# Supplementary material
Source: publisher figshare collection journal article supplement (https://acs.figshare.com/ndownloader/files/17662967)

---

## Supporting Information

### **Synthesis of the Antimalarial Peptide Aldehyde, a Precursor of Kozupeptin A, Utilizing a Designed Hydrophobic Anchor Molecule**

Yumi Hayashi,<sup>a</sup> Tomoyasu Hirose,<sup>a,b</sup> Masato Iwatsuki,<sup>a,b</sup> Satoshi Ōmura,<sup>a,b</sup> and Toshiaki Sunazuka<sup>\*,a,b</sup>

<sup>a</sup>Graduate School of Infection Control Sciences, Kitasato University, 5-9-1 Shirokane, Minato-ku, Tokyo 108-8641, Japan

<sup>b</sup>Kitasato Institute for Life Sciences, Kitasato University, 5-9-1 Shirokane, Minato-ku, Tokyo 108-8641, Japan

---

## Table of contents

|                                                                                                 |              |
|-------------------------------------------------------------------------------------------------|--------------|
| <b>Table of contents</b>                                                                        | <b>p. 2</b>  |
| <b>General remarks</b>                                                                          | <b>p. 3</b>  |
| <b>Screening of condensation reagents to suppress the epimerization in our previous report</b>  | <b>p. 3</b>  |
| <b>Experimental procedures and compounds characterization</b>                                   | <b>p. 4</b>  |
| Preparation of TAGa-type anchor molecule                                                        | p. 4         |
| Preparation of TAGb-type anchor molecule                                                        | p. 6         |
| Peptide elongations (using TAGa-type anchor molecule)                                           | p. 7         |
| Reduction to afford the aldehyde                                                                | p. 10        |
| Use of a model substrate                                                                        | p. 12        |
| Using TAGb-type anchor molecule                                                                 | p. 14        |
| Selective deprotection of TAG benzyl group under acid conditions and reduction to the aldehydes | p. 17        |
| <b>References</b>                                                                               | <b>p. 18</b> |
| <b>NMR spectra of the products</b>                                                              | <b>p. 19</b> |

## General remarks

Infrared (IR) spectra were recorded on a Horiba FT-210 spectrometer. UV spectra were measured with a Beckman DU640 spectrophotometer. NMR spectra were measured on a JEOL JNM-ECA-500 spectrometer with  $^1\text{H}$  NMR at 500 MHz and  $^{13}\text{C}$  NMR at 125 MHz. Chemical shifts were reported in ppm from the internal solvent peaks for chloroform- $d_1$  ( $\text{CDCl}_3$ ) ( $^1\text{H}$ ;  $\delta$  = 7.26 ppm,  $^{13}\text{C}$ ;  $\delta$  = 77.16 ppm) or dimethylsulfoxide- $d_6$  ( $(\text{CD}_3)_2\text{SO}$ , DMSO- $d_6$ ) ( $^1\text{H}$ ;  $\delta$  = 2.50 ppm,  $^{13}\text{C}$ ;  $\delta$  = 39.52 ppm).  $^1\text{H}$  NMR data were reported as follows: chemical shift (integration, multiplicity (s = singlet, d = doublet, t = triplet, q = quartet, m = multiplet, br = broad, app = apparent), coupling constants (Hz)). Liquid chromatography-electrospray ionization mass spectrometry (LC/MS) was performed on a Waters AQUITY UPLC H-Class using acetonitrile (MeCN) solvent system containing 0.05% formic acid. The high-resolution mass spectra (HRMS) were performed on a JEOL JMS-AX505 HA, a JEOL JMS-700 MStation, or a JEOL JMS-T100LP. Optical rotations were measured on a JASCO P-1010 polarimeter.

For thin layer chromatography (TLC) analysis, Merck precoated TLC plates (silica gel 60 GF<sub>254</sub>, 0.25 mm) were used. Flash chromatography was carried out with Kanto Chemical silica gel (silica gel 60N, spherical neutral, 0.040–0.050 mm) or Fuji Silysia silica gel (FL60D, avg. 0.060 mm). For purification with preparative thin layer chromatography (PLC), Merck precoated PLC plates (silica gel 60 GF<sub>254</sub>, 0.5 mm) were used.

Unless otherwise noted, reagents and solvents were commercially available and used without further purification. In experiments requiring dry solvents, dichloromethane (DCM) and tetrahydrofuran (THF) were purchased from Kanto Chemical Co. Inc. as "Dehydrated." For Fmoc-protected amino acids, Fmoc-Ala-OH, Fmoc-Asn-OH, Fmoc-Val-OH, and Fmoc-Thr-OH·H<sub>2</sub>O were purchased from Watanabe Chemical Industries, Ltd. Fmoc-(2S, 4R)-4-MePro-OH was prepared by the procedure described in the literature.<sup>[1]</sup>

## Screening of condensation reagents to suppress the epimerization in our previous report<sup>[2]</sup> (not shown in the previous paper)

### Experimental procedure and determination of the stereochemistry of $\alpha$ -position of Ala unit (L or D)

To a solution of **S1** (5.0 mg, 0.01 mmol, 1.0 eq.), MeO(Me)NH·HCl, and condensation reagent in dimethylformamide (DMF) (0.036 M) was added *N,N*-diisopropylethylamine (DIPEA) at room temperature. After stirring at room temperature until **S1** was completely consumed, the reaction mixture was then treated with aqueous 1 N HCl in an ice bath to quench the excess amine reagent, poured into a separatory funnel containing ethyl acetate (EtOAc) (20 mL), and washed with aqueous 1 N HCl (2 x 10 mL) and sat. NaCl aq. (10 mL). The organic layer was dried over Na<sub>2</sub>SO<sub>4</sub>, filtered, and concentrated in vacuo to afford the crude product **S2**.

The diastereoselective ratio (L/D) of  $\alpha$ -position of Ala unit was determined by advanced Marfey's analysis.<sup>[3]</sup> A sample (100  $\mu\text{g}$ ) of the above crude product **S2** was dissolved in 6 N HCl (500  $\mu\text{L}$ ) and heated for 3 h at 100 °C. After cooling to room temperature, the hydrolysate was evaporated to dryness in vacuo, and the residue was dissolved in 100  $\mu\text{L}$  of water. 50  $\mu\text{L}$  of the hydrolysate aq. was treated with 25  $\mu\text{L}$  of 1 M NaHCO<sub>3</sub> and 50  $\mu\text{L}$  of 1% 1-fluoro-2,4-dinitrophenyl-5-D-leucinamide (D-FDLA) in acetone. The mixture was heated for 1 h at 37 °C. After cooling to room temperature, the reaction mixture was neutralized with 1 N HCl, and concentrated in vacuo. The residue was dissolved with 200  $\mu\text{L}$  of MeCN, filtered to remove salt and analyzed by UPLC-MS (Waters Co., USA) on reversed-phase column (BEH C18 column; 2.1 x 50 mm, 1.7  $\mu\text{m}$ , 0.5 mL/min) with a linear gradient from 50% to 100% aqueous MeCN containing formic acid (mobile phase A; 100% MeCN + 0.05% formic acid and mobile phase B; 90% H<sub>2</sub>O / 10% MeCN + 0.05% formic acid) for 10 min.

Commercial L-Ala-OH and D-Ala-OH standards were adjusted to 1 mM with water and were subjected to advanced Marfey's analysis as described above. The ESI positive mode was used for the detection of L- or D-Ala-D-FDLA derivative, and the L/D ratio of  $\alpha$ -position of Ala unit was determined by a comparison of retention time between the Ala-D-FDLA derivatives from the hydrolysate of crude product **S2** and standards. The results were summarized in Table S1.

**Table S1.** Screening of condensation reagents in the transformation of carboxylic acid **S1** to Weinreb amide **S2**.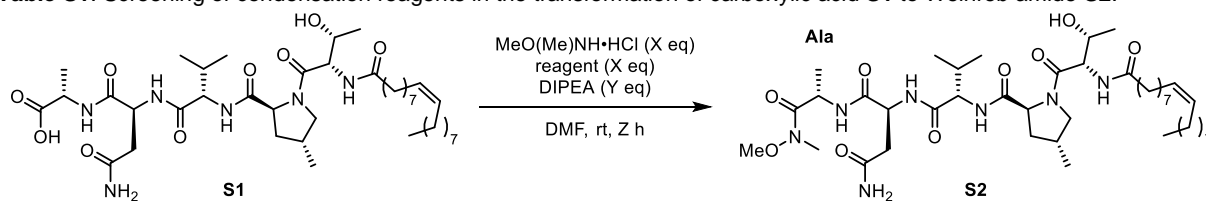

| entry | reagent | X eq | Y eq | Z h <sup>[a]</sup> | L/D of <b>Ala</b> unit <sup>[b]</sup> | yield (isolated)      |
|-------|---------|------|------|--------------------|---------------------------------------|-----------------------|
| 1     | HBTU    | 1.2  | 2.4  | 3                  | 62/38                                 | —                     |
| 2     | HATU    | 1.2  | 2.4  | 4.5                | 82/18                                 | —                     |
| 3     | COMU    | 1.2  | 2.4  | 4.5                | 86/14                                 | —                     |
| 4     | PyBroP  | 1.8  | 4.8  | 5                  | 61/39                                 | —                     |
| 5     | PyAOP   | 1.2  | 2.4  | 6                  | 89/11                                 | —                     |
| 6     | DEPBT   | 3.2  | 6.4  | 16                 | 97/3                                  | quant. <sup>[c]</sup> |

<sup>[a]</sup>In all entries, full conv. <sup>[b]</sup>Determined by advanced Marfey's analysis after complete hydrolysis.

<sup>[c]</sup>120 mg scale of **S1** (0.15 mmol). The crude was purified by flash column chromatography on silica gel ( $\text{CHCl}_3/\text{MeOH}$ ).

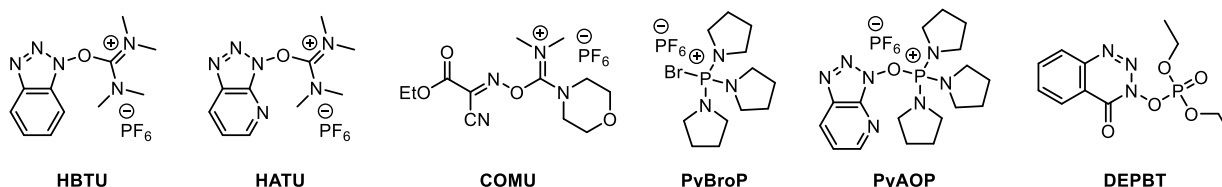

## Experimental procedures and compounds characterization

### Preparation of TAGa-type anchor molecule

**Scheme S1.** Synthesis of a new designed hydrophobic anchor molecule (TAGa-type anchor molecule)

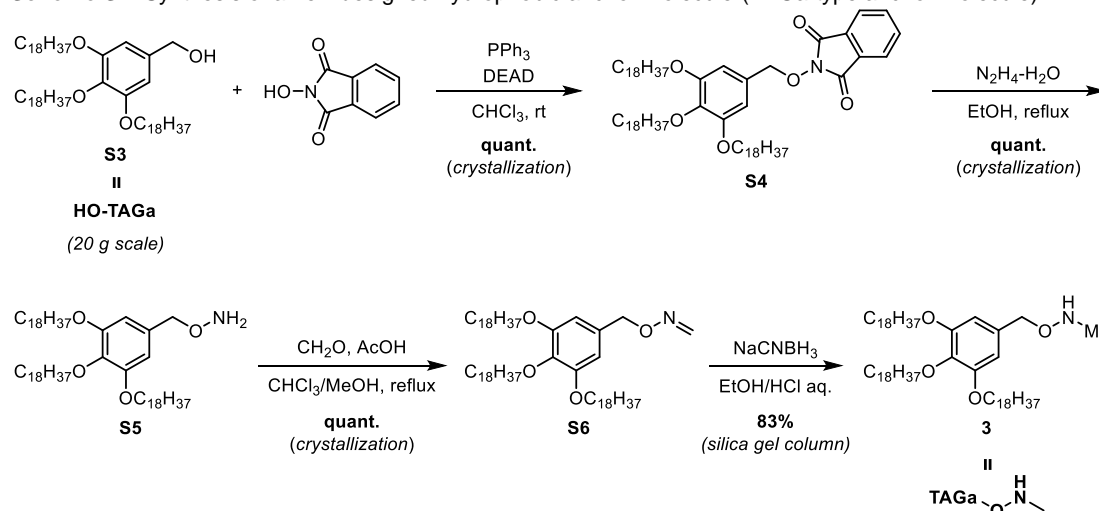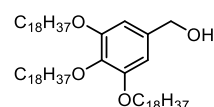

#### 3,4,5-Tris(octadecyloxy)benzyl alcohol (**S3**) (HO-TAGa)

HO-TAGa (**S3**) was prepared by the procedure described in the literature as a white powder.<sup>[4]</sup> mp 68–69 °C; <sup>1</sup>H NMR (500 MHz,  $\text{CDCl}_3$ )  $\delta$  6.56 (2H, s), 4.59 (2H, s), 3.98–3.92 (6H, m, overlapped), 1.82–1.71 (6H, m, overlapped), 1.50–1.43 (6H, br m, overlapped), 1.35–1.22 (84H, br m, overlapped), 0.88 (9H, t,  $J = 7.0$  Hz); <sup>13</sup>C NMR (125 MHz,  $\text{CDCl}_3$ )  $\delta$  153.4, 137.7, 136.2, 105.5, 73.6, 69.3, 65.8, 32.1, 30.5, 29.9–29.5 (many signals overlapped), 26.29, 26.26, 22.8, 14.3; IR (KBr)  $\nu$  ( $\text{cm}^{-1}$ ) 3541, 2916, 2848, 1594, 1462, 1439, 1118, 719; HRMS (FAB, NBA matrix) Calcd. for  $\text{C}_{61}\text{H}_{116}\text{O}_4$ : 912.8874 ( $[\text{M}]^+$ ), Found: 912.8876.

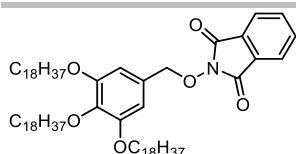

**Phthalimide-O-TAGa (S4)**

To a solution of **S3** (20.0 g, 21.9 mmol, 1.0 eq), triphenylphosphine (PPh<sub>3</sub>) (11.5 g, 43.8 mmol, 2.0 eq) and *N*-hydroxyphthalimide (7.14 g, 43.8 mmol, 2.0 eq) in CHCl<sub>3</sub> (274 mL, 0.08 M) was added dropwise diethyl azodicarboxylate (DEAD) (40% toluene solution, 19.1 g, 43.8 mmol, 2.0 eq) at 0 °C for 20 min. The mixture was heated to room temperature and stirred for 5 h. Methanol (MeOH) (1370 mL, 5-fold excess of CHCl<sub>3</sub>) was added to the reaction mixture and the resulting heterogeneous solution was stirred for a further 30 min at room temperature. The precipitate was filtered and washed with additional MeOH to afford phthalimide-O-TAGa (**S4**) (23.2 g, quant.) as a white powder. mp 81 °C; <sup>1</sup>H NMR (500 MHz, CDCl<sub>3</sub>) δ 7.82-7.78 (2H, m), 7.74-7.71 (2H, m), 6.72 (2H, s), 5.13 (2H, s), 3.97-3.92 (6H, m, overlapped), 1.80-1.68 (6H, m, overlapped), 1.48-1.42 (6H, br m, overlapped), 1.35-1.22 (84H, br m, overlapped), 0.88 (9H, t, *J* = 7.0 Hz); <sup>13</sup>C NMR (125 MHz, CDCl<sub>3</sub>, peaks were complex because of rotamers) δ 163.6, 153.3, 139.1, 134.5, 129.0, 128.6, 123.6, 108.4, 80.3, 73.5, 69.3, 32.1, 30.4, 29.9-29.5 (many signals overlapped), 26.2, 22.8, 14.3; IR (KBr) ν (cm<sup>-1</sup>) 2916, 2849, 1739, 1466, 1440, 1112, 700; HRMS (FAB, NBA + Na matrix) Calcd. for C<sub>69</sub>H<sub>119</sub>NO<sub>6</sub>Na: 1080.8935 ([M+Na]<sup>+</sup>), Found: 1080.8942.

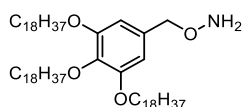

**NH<sub>2</sub>-O-TAGa (S5)**

To a solution of **S4** (23.2 g, 21.9 mmol, 1.0 eq) in ethanol (EtOH) (730 mL, 0.03 M) was added dropwise N<sub>2</sub>H<sub>4</sub>·H<sub>2</sub>O (11.0 g, 219 mmol, 10 eq) at room temperature. The mixture was heated to reflux and stirred for 8 h. After cooling to room temperature, the resulting heterogeneous solution was stirred for a further 30 min at room temperature. The precipitate was filtered and washed with additional EtOH to afford NH<sub>2</sub>-O-TAGa (**S5**) (20.3 g, quant.) as a white powder. mp 69–70 °C; <sup>1</sup>H NMR (500 MHz, CDCl<sub>3</sub>) δ 6.55 (2H, s), 5.39 (2H, br s), 4.59 (2H, s), 3.98-3.92 (6H, m, overlapped), 1.82-1.71 (6H, m, overlapped), 1.50-1.43 (6H, br m, overlapped), 1.37-1.22 (84H, br m, overlapped), 0.88 (9H, t, *J* = 7.0 Hz); <sup>13</sup>C NMR (125 MHz, CDCl<sub>3</sub>) δ 153.4, 138.1, 132.4, 106.8, 78.5, 73.5, 69.2, 32.1, 30.5, 29.9-29.5 (many signals overlapped), 26.29, 26.26, 22.8, 14.3; IR (KBr) ν (cm<sup>-1</sup>) 2914, 2848, 1596, 1469, 1243, 1128, 718; HRMS (ESI<sup>+</sup>) Calcd. for C<sub>61</sub>H<sub>118</sub>NO<sub>4</sub>: 928.9061 ([M+H]<sup>+</sup>), Found: 928.9056.

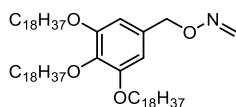

**CH<sub>2</sub>=N-O-TAGa (S6)**

A mixture of **S5** (20.3 g, 21.9 mmol, 1.0 eq) and paraformaldehyde ((CH<sub>2</sub>O)<sub>n</sub>) (6.56 g, 219 mmol, 10 eq) in CHCl<sub>3</sub>/MeOH = 5/1 (375 mL, 0.06 M) was heated to reflux and stirred for 3 h. After cooling to room temperature, MeOH (1560 mL, 5-fold excess of CHCl<sub>3</sub>) was added to the reaction mixture and was stirred for a further 30 min at room temperature. The precipitate was filtered and washed with additional MeOH to afford CH<sub>2</sub>=N-O-TAGa (**S6**) (20.6 g, quant.) as a white powder. mp 71–72 °C; <sup>1</sup>H NMR (500 MHz, CDCl<sub>3</sub>) δ 7.09 (1H, d, *J* = 8.5 Hz), 6.55 (2H, s), 6.48 (1H, d, *J* = 8.5 Hz), 5.02 (2H, s), 3.98-3.92 (6H, m, overlapped), 1.82-1.70 (6H, m, overlapped), 1.49-1.43 (6H, br m, overlapped), 1.35-1.22 (84H, br m, overlapped), 0.88 (9H, t, *J* = 7.5 Hz); <sup>13</sup>C NMR (125 MHz, CDCl<sub>3</sub>) δ 153.3, 138.1, 137.8, 132.4, 106.9, 76.6, 73.5, 69.2, 32.1, 30.5, 29.9-29.2 (many signals overlapped), 26.29, 26.26, 22.8, 14.3; IR (KBr) ν (cm<sup>-1</sup>) 2914, 2847, 1596, 1469, 1243, 1129, 717; HRMS data is not available because the parent peak was not detected by ESI nor FAB. Only hydrolyzed peaks (928.9 ([**S5** + H]<sup>+</sup>) and 959.9 ([**S5** + Na]<sup>+</sup>)) were observed.

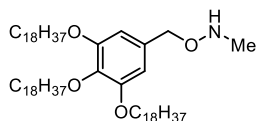

**Me-HN-O-TAGa (3)**

To a solution of **S6** (17.6 g, 18.7 mmol, 1.0 eq) and NaBH<sub>3</sub>CN (3.53 g, 56.1 mmol, 3.0 eq) in EtOH/THF = 1/1 (535 mL, 0.035 M) was added dropwise conc. HCl (4.29 g) at room temperature until the pH reached around 3. After stirring for 2 h, MeOH (1338 mL, 5-fold excess of THF) was added to the mixture and the resulting heterogeneous solution was stirred for a further 30 min at room temperature. The precipitate was filtered and washed with additional MeOH to afford Me-HN-O-TAGa (**3**) (17.7 g, app. quant.) as a white powder. Additional purification was performed by column chromatography on silica gel (CHCl<sub>3</sub>/*n*-hexane = 1/1 to 5/1 as eluent) to give highly pure **3** (14.7 g, 83%) as a white powder. mp 53–54 °C; <sup>1</sup>H NMR (500 MHz, CDCl<sub>3</sub>) δ 6.55 (2H, s), 5.54 (1H, br s), 4.61 (2H, s), 3.98-3.91 (6H, m, overlapped), 2.75 (3H, s), 1.82-1.70 (6H, m, overlapped), 1.49-1.43 (6H, br m, overlapped), 1.37-1.22 (84H, br m, overlapped), 0.88 (9H, t, *J* = 7.5 Hz); <sup>13</sup>C NMR (125 MHz, CDCl<sub>3</sub>) δ 153.3, 137.9, 133.1, 106.8, 76.1, 73.5, 69.2, 39.4, 32.1, 30.5, 29.9-29.5 (many signals overlapped), 26.29, 26.26, 22.8, 14.3; IR (KBr) ν (cm<sup>-1</sup>) 2916, 2849, 1588, 1468, 1234, 1116, 720; HRMS (ESI<sup>+</sup>) Calcd. for C<sub>62</sub>H<sub>120</sub>NO<sub>4</sub>: 942.9217 ([M+H]<sup>+</sup>), Found: 942.9241.

## Preparation of TAGb-type anchor molecule

**Scheme S2.** Synthesis of TAGb-type anchor molecule

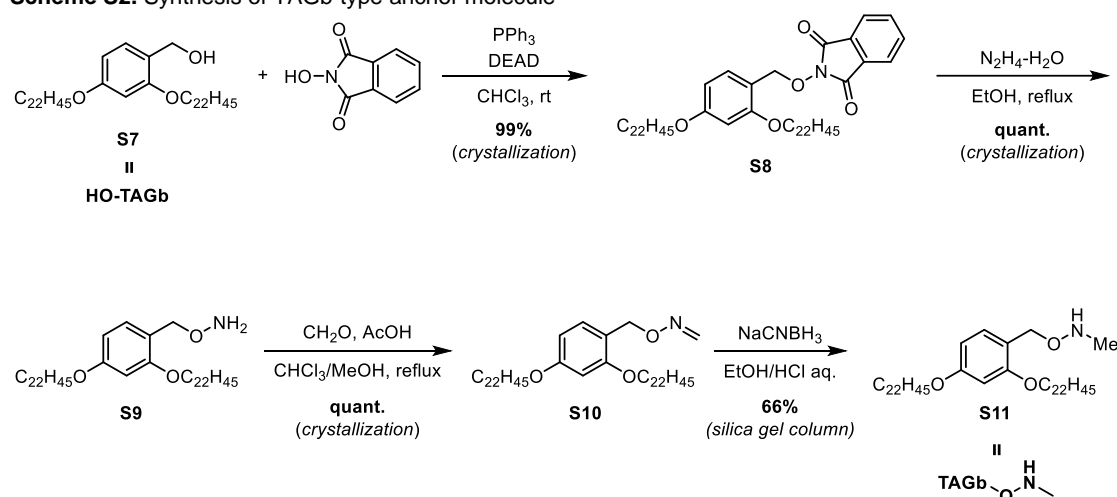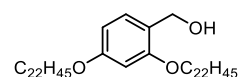

**2,4-Bis(docosyloxy)benzyl alcohol (S7) (HO-TAGb)**<sup>[5]</sup>

HO-TAGb (**S7**) (11.4 g, 15.1 mmol) was prepared by the same procedure as HO-TAGa (**S3**) described above as a white powder. mp 69–70 °C; <sup>1</sup>H NMR (500 MHz, CDCl<sub>3</sub>) δ 7.13 (1H, d, *J* = 8.5 Hz), 6.45 (1H, d, *J* = 2.5 Hz), 6.42 (1H, dd, *J* = 8.0, 2.0 Hz), 4.61 (2H, d, *J* = 6.5 Hz), 3.98 (2H, t, *J* = 6.5 Hz), 3.93 (2H, t, *J* = 6.5 Hz), 2.27 (1H, t, *J* = 6.5 Hz), 1.83–1.74 (4H, m, overlapped), 1.48–1.41 (4H, br m, overlapped), 1.37–1.22 (72H, br m, overlapped), 0.88 (6H, t, *J* = 7.0 Hz); <sup>13</sup>C NMR (125 MHz, CDCl<sub>3</sub>, peaks were complex because of rotamers) δ 160.3, 158.2, 129.7, 121.8, 104.6, 99.9, 68.3, 68.1, 62.2, 32.1, 29.9–29.4 (many signals overlapped), 26.3, 26.2, 22.8, 14.3; IR (KBr) ν (cm<sup>-1</sup>) 2916, 2848, 1614, 1470, 1180, 1121, 718; HRMS (FAB, NBA + Na matrix) Calcd. for C<sub>51</sub>H<sub>96</sub>O<sub>3</sub>Na: 779.7257 ([M+Na]<sup>+</sup>), Found: 779.7258.

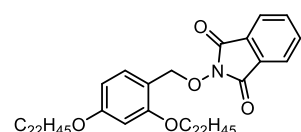

**Phthalimide-O-TAGb (S8)**

Following the same procedure described for phthalimide-O-TAGa (**S4**), HO-TAGb (**S7**) (6.30 g, 8.3 mmol) was converted to phthalimide-O-TAGa (**S4**) (7.40 g, 99%) as a white powder. mp 85–86 °C; <sup>1</sup>H NMR (500 MHz, CDCl<sub>3</sub>) δ 7.80–7.76 (2H, m), 7.72–7.68 (2H, m), 7.32 (1H, d, *J* = 8.5 Hz), 6.43 (1H, dd, *J* = 8.5, 2.5 Hz), 6.37 (1H, d, *J* = 2.0 Hz), 5.20 (2H, s), 3.92 (2H, t, *J* = 6.5 Hz), 3.82 (2H, t, *J* = 6.5 Hz), 1.75 (2H, m), 1.68 (2H, m), 1.46–1.22 (76H, br m, overlapped), 0.88 (6H, t, *J* = 7.0 Hz); <sup>13</sup>C NMR (125 MHz, CDCl<sub>3</sub>) δ 163.6, 161.7, 159.4, 134.2, 133.5, 129.2, 123.4, 115.1, 105.0, 99.7, 74.5, 68.5, 68.1, 32.1, 29.9–29.4 (many signals overlapped), 29.1, 26.2, 26.1, 22.8, 14.3; IR (KBr) ν (cm<sup>-1</sup>) 2913, 2849, 1745, 1471, 1187, 969, 695; HRMS (FAB, NBA + Na matrix) Calcd. for C<sub>59</sub>H<sub>99</sub>NO<sub>5</sub>Na: 924.7421 ([M+Na]<sup>+</sup>), Found: 924.7426.

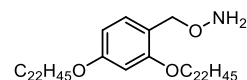

**NH<sub>2</sub>-O-TAGb (S9)**

Following the same procedure described for NH<sub>2</sub>-O-TAGa (**S5**), phthalimide-O-TAGb (**S8**) (7.30 g, 8.1 mmol) was converted to NH<sub>2</sub>-O-TAGb (**S9**) (6.25 g, quant.) as a white powder. mp 71–73 °C; <sup>1</sup>H NMR (500 MHz, CDCl<sub>3</sub>) δ 7.22 (1H, m), 6.46–6.43 (2H, m, overlapped), 5.33 (2H, s), 4.69 (2H, s), 3.96–3.93 (4H, m, overlapped), 1.82–1.74 (4H, m, overlapped), 1.48–1.41 (4H, br m, overlapped), 1.37–1.22 (72H, br m, overlapped), 0.88 (6H, t, *J* = 7.0 Hz); <sup>13</sup>C NMR (125 MHz, CDCl<sub>3</sub>, peaks were complex because of rotamers) δ 160.6, 158.7, 131.4, 117.9, 104.7, 100.0, 73.1, 68.4, 68.2, 32.1, 29.9–29.3 (many signals overlapped), 26.23, 26.21, 22.8, 14.3; IR (KBr) ν (cm<sup>-1</sup>) 2915, 2848, 1618, 1471, 1200, 1178, 1041, 717; HRMS (ESI<sup>+</sup>) Calcd. for C<sub>51</sub>H<sub>98</sub>NO<sub>3</sub>: 772.7547 ([M+H]<sup>+</sup>), Found: 772.7550.

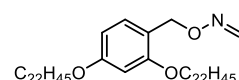

**CH<sub>2</sub>=N-O-TAGb (S10)**

Following the same procedure described for CH<sub>2</sub>=N-O-TAGa (**S6**), NH<sub>2</sub>-O-TAGb (**S9**) (3.94 g, 5.1 mmol) was converted to CH<sub>2</sub>=N-O-TAGb (**S10**) (4.00 g, quant.) as a white powder. mp 64–65 °C; <sup>1</sup>H NMR (500 MHz, CDCl<sub>3</sub>) δ 7.22 (1H, m), 7.05 (1H, d, *J* = 8.5 Hz), 6.45–6.42 (3H, m, overlapped), 5.12 (2H, s), 3.96–3.92 (4H, m, overlapped), 1.81–1.74 (4H, m, overlapped), 1.48–1.41 (4H, br m, overlapped), 1.37–1.22 (72H, br m, overlapped), 0.88 (6H, t, *J* = 7.0 Hz); <sup>13</sup>C NMR (125 MHz, CDCl<sub>3</sub>, peaks were complex because of rotamers) δ 160.6, 158.4, 137.1, 131.1, 118.1, 104.7, 100.0, 71.2, 68.3, 68.2, 32.1, 29.9–29.3 (many signals overlapped), 26.2, 22.8, 14.3; IR (KBr) ν (cm<sup>-1</sup>) 2916, 2848, 1613, 1465, 1289, 1183, 1004, 817, 718; HRMS (ESI<sup>+</sup>) Calcd. for C<sub>52</sub>H<sub>97</sub>NO<sub>3</sub>Na: 806.7366 ([M+Na]<sup>+</sup>), Found: 806.7352.

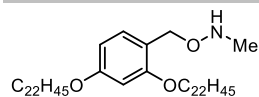

**Me-HN-O-TAGb (S11)**

Following the same procedure described for Me-HN-O-TAGa (**3**), CH<sub>2</sub>=N-O-TAGb (**S10**) (3.95 g, 5.0 mmol) was converted to Me-HN-O-TAGb (**S11**) (2.61 g after purification by column chromatography on silica gel (CHCl<sub>3</sub>/*n*-hexane = 1/1 to 5/1 as eluent), 66%) as a white powder. mp 60–61 °C; <sup>1</sup>H NMR (500 MHz, CDCl<sub>3</sub>) δ 7.22 (1H, m), 6.44–6.42 (2H, m, overlapped), 5.49 (1H, br s), 4.70 (2H, s), 3.96–3.91 (4H, m, overlapped), 2.75 (3H, s), 1.81–1.73 (4H, m, overlapped), 1.48–1.41 (4H, br m, overlapped), 1.37–1.22 (72H, br m, overlapped), 0.88 (6H, t, *J* = 7.5 Hz); <sup>13</sup>C NMR (125 MHz, CDCl<sub>3</sub>, peaks were complex because of rotamers) δ 160.4, 158.5, 131.2, 118.5, 104.7, 100.0, 70.3, 68.3, 68.2, 39.3, 32.1, 29.9–29.4 (many signals overlapped), 26.3, 26.2, 22.8, 14.3; IR (KBr) ν (cm<sup>-1</sup>) 2915, 2848, 1613, 1466, 1287, 1178, 718; HRMS (ESI<sup>+</sup>) Calcd. for C<sub>52</sub>H<sub>100</sub>NO<sub>3</sub>: 786.7703 ([M+H]<sup>+</sup>), Found: 786.7685.

## Peptide elongations

### General procedure for elongation of peptide chain (condensation with Fmoc-protected amino acid)

To a solution of free amine (1.0 eq) in DCM (0.05 M for substrate) was added Fmoc protected amino acid (1.1 eq), 1-hydroxybenzotriazole (HOBt) (1.2 eq), and *N,N'*-diisopropylcarbodiimide (DIC) (1.2 eq (2.3 eq when Fmoc protected amino acid was monohydrate)) at room temperature to 40 °C and stirred until the reaction completed (1.5 to 5 h). The reaction mixture was subsequently cooled to 0 °C and MeOH (generally 5-fold excess of DCM) was added. The resulting heterogeneous solution was stirred for a further 30 min at 0 °C, and the precipitate was filtered and washed with additional MeOH to afford the corresponding Fmoc protected peptide with an anchor molecule as a white to off-white powder.

### General procedure for Fmoc deprotection

The Fmoc protected amino acid or peptide was dissolved into or 10% piperidine/DCM or 1% piperidine/1% 1,8-diazabicyclo[5.4.0]-7-undecene (DBU)/CHCl<sub>3</sub> (0.036 M for substrate) at room temperature, and the solution was stirred until the reaction was completed (generally 0.5 h to 2 h). The reaction mixture was subsequently cooled to 0 °C and MeOH (generally 5-fold excess of DCM or CHCl<sub>3</sub>) was added. The resulting heterogeneous solution was stirred for a further 30 min at 0 °C, and the precipitate was filtered and washed with additional MeOH to afford the corresponding amine as a white to off-white powder.

## Using TAGa-type anchor molecule

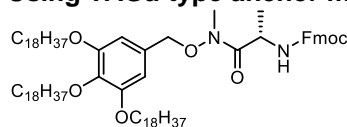

**Fmoc-Ala-(Me)N-O-TAGa (S12)**

Following the general procedure described for condensation, Me-HN-O-TAGa (**3**) (5.00 g, 5.3 mmol) was converted to Fmoc-Ala-(Me)N-O-TAGa (**S12**) (6.56 g, quant.) as a white powder. [α]<sub>D</sub><sup>24.3</sup> = +12.1 (c 0.1, CHCl<sub>3</sub>); mp 56–59 °C; <sup>1</sup>H NMR (500 MHz, CDCl<sub>3</sub>) δ 7.77 (2H, d, *J* = 7.5 Hz), 7.62 (2H, t, *J* = 7.5 Hz), 7.40 (2H, t, *J* = 7.5 Hz), 7.32 (2H, t, *J* = 7.5 Hz), 6.63 (2H, s), 5.62 (1H, br d, *J* = 8.5 Hz), 4.88 (1H, br m), 4.86 (2H, s), 4.40–4.34 (2H, m, overlapped), 4.24 (1H, t, *J* = 7.5 Hz), 4.00–3.94 (6H, m, overlapped), 3.24 (3H, s), 1.83–1.71 (6H, m, overlapped), 1.50–1.44 (6H, br m, overlapped), 1.37–1.22 (87H, br m, overlapped), 0.89 (9H, t, *J* = 7.0 Hz); <sup>13</sup>C NMR (125 MHz, CDCl<sub>3</sub>) δ 173.9, 155.9, 153.5, 144.1, 143.9, 141.40, 141.38, 138.9, 129.1, 127.8, 127.2, 125.29, 125.25, 120.1, 107.8, 77.7, 73.5, 69.3, 67.1, 47.4, 47.3, 33.9, 32.1, 30.5, 29.9–29.5 (many signals overlapped), 26.2, 22.8, 18.6, 14.2; IR (KBr) ν (cm<sup>-1</sup>) 2916, 2849, 1658, 1467, 1243, 1119, 740, 720; HRMS (FAB, NBA + NaI matrix) Calcd. for C<sub>80</sub>H<sub>134</sub>O<sub>7</sub>N<sub>2</sub>Na: 1258.0089 ([M + Na]<sup>+</sup>), Found: 1258.0090.

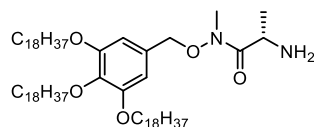

**Ala-(Me)N-O-TAGa (4)**

Following the general procedure described for Fmoc deprotection, Fmoc-Ala-(Me)N-O-TAGa (**S12**) (3.90 g, 3.2 mmol) was converted to Ala-(Me)N-O-TAGa (**4**) (3.20 g, quant.) as a white powder. [α]<sub>D</sub><sup>24.3</sup> = +5.6 (c 0.1, CHCl<sub>3</sub>); mp 64–65 °C; <sup>1</sup>H NMR (500 MHz, CDCl<sub>3</sub>) δ 6.53 (2H, s), 4.74 (2H, app dd, *J* = 18.5, 10.5 Hz), 3.97–3.93 (6H, m, overlapped), 3.85 (1H, br d, *J* = 6.0 Hz), 3.22 (3H, s), 1.82–1.70 (6H, m, overlapped), 1.49–1.43 (6H, br m, overlapped), 1.37–1.22 (87H, br m, overlapped), 0.87 (9H, t, *J* = 7.0 Hz); <sup>13</sup>C NMR (125 MHz, CDCl<sub>3</sub>) δ 178.2, 153.5, 139.0, 129.3, 107.7, 77.0, 73.6, 69.4, 47.3, 34.0, 32.1, 30.5, 29.9–29.5 (many signals overlapped), 26.2, 22.8, 20.8, 14.3; IR (KBr) ν (cm<sup>-1</sup>) 2915, 2848, 1641, 1469, 1335, 1240, 1123, 719; HRMS (FAB, NBA + NaI matrix) Calcd. for C<sub>65</sub>H<sub>124</sub>O<sub>5</sub>N<sub>2</sub>Na: 1035.9408 ([M + Na]<sup>+</sup>), Found: 1035.9396.

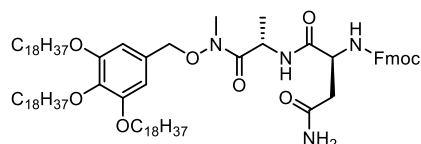

**Fmoc-Asn-Ala-(Me)N-O-TAGa (S13)**

Following the general procedure described for condensation, Ala-(Me)N-O-TAGa (**4**) (5.00 g, 4.9 mmol) was converted to Fmoc-Asn-Ala-(Me)N-O-TAGa (**S13**) (6.54 g, 98%) as a white powder. [α]<sub>D</sub><sup>24.4</sup> = +11.9 (c 0.1, CHCl<sub>3</sub>); mp 134–135 °C; <sup>1</sup>H NMR (500 MHz, CDCl<sub>3</sub>) δ 7.75 (2H, d, *J* = 7.5 Hz), 7.60 (2H, br dd, *J* = 7.0, 4.5 Hz), 7.54 (1H, br d, *J* = 7.5 Hz), 7.39 (2H, t, *J* = 7.5 Hz), 7.31 (2H, td, *J* = 7.5, 1.0 Hz), 6.58 (2H, s), 6.36 (1H, br d, *J* = 7.5 Hz), 6.09 (1H, br s), 5.63 (1H, br s), 4.93 (1H, br m), 4.84 (2H, app dd, *J* = 19.5,

10.0 Hz), 4.60 (1H, br m), 4.41-4.35 (2H, m, overlapped), 4.22 (1H, t,  $J = 7.5$  Hz), 3.98-3.93 (6H, m, overlapped), 3.20 (3H, s), 2.91 (1H, br m), 2.63 (1H, br m), 1.82-1.71 (6H, m, overlapped), 1.49-1.44 (6H, br m, overlapped), 1.34-1.22 (87H, br m, overlapped), 0.88 (9H, t,  $J = 7.0$  Hz);  $^{13}\text{C}$  NMR (125 MHz,  $\text{CDCl}_3$ )  $\delta$  173.4 (two signals), 170.5, 156.2, 153.5, 144.0, 143.8, 141.4, 138.7, 129.3, 127.8, 127.2, 125.3, 120.1, 107.7, 73.6, 69.3, 67.4, 51.3, 47.2, 46.5, 37.7, 34.0, 32.1, 30.5, 29.9-29.5 (many signals overlapped), 26.3, 22.8, 17.7, 14.3; IR (KBr)  $\nu$  ( $\text{cm}^{-1}$ ) 3403, 3298, 2916, 2848, 1668, 1655, 1468, 1262, 1125, 990, 740, 719; HRMS (FAB, NBA + NaI matrix) Calcd. for  $\text{C}_{84}\text{H}_{140}\text{O}_9\text{N}_4\text{Na}$ : 1372.0518 ( $[\text{M} + \text{Na}]^+$ ), Found: 1372.0538.

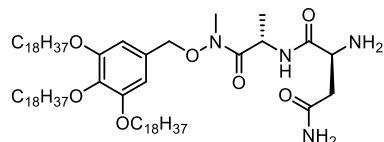

#### Asn-Ala-(Me)N-O-TAGa (**5**)

Following the general procedure described for Fmoc deprotection, Fmoc-Asn-Ala-(Me)N-O-TAGa (**S13**) (5.00 g, 3.7 mmol) was converted to Asn-Ala-(Me)N-O-TAGa (**5**) (4.18 g, quant.) as a white powder.  $[\alpha]_{\text{D}}^{24.5} = -4.2$  (c 0.1,  $\text{CHCl}_3$ ); mp 67–69 °C;  $^1\text{H}$  NMR (500 MHz,  $\text{CDCl}_3$ )  $\delta$  7.92 (1H, br d,  $J = 7.5$  Hz), 6.59 (2H, s), 6.35 (1H, br s), 5.62 (1H, br s), 4.97 (1H, br m), 4.84 (2H, app dd,  $J = 21.5, 10.5$  Hz), 3.98-3.92 (6H, m, overlapped), 3.70 (1H, m), 3.20 (3H, s), 2.67 (1H, br m), 2.53 (1H, br m), 1.82-1.70 (6H, m, overlapped), 1.49-1.43 (6H, br m, overlapped), 1.37-1.21 (87H, br m, overlapped), 0.87 (9H, t,  $J = 7.0$  Hz);  $^{13}\text{C}$  NMR (125 MHz,  $\text{CDCl}_3$ , Signals were complex due to the rotamers.)  $\delta$  173.75, 173.69, 173.55, 173.50, 173.45, 153.4, 138.8, 129.3, 107.8, 77.4, 73.6, 69.3, 52.4, 45.8, 45.6, 40.6, 34.0, 32.1, 30.5, 29.9-29.5 (many signals overlapped), 26.3, 22.8, 18.08, 18.05, 14.3; IR (KBr)  $\nu$  ( $\text{cm}^{-1}$ ) 3366, 2916, 2848, 1659, 1468, 1334, 1122, 719; HRMS (FAB, NBA matrix) Calcd. for  $\text{C}_{69}\text{H}_{131}\text{O}_7\text{N}_4$ : 1128.0018 ( $[\text{M} + \text{H}]^+$ ), Found: 1128.0023.

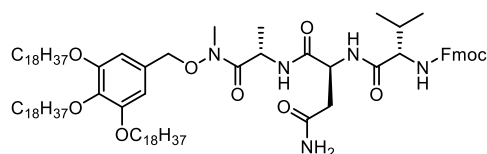

#### Fmoc-Val-Asn-Ala-(Me)N-O-TAGa (**S14**)

Following the general procedure described for condensation, Asn-Ala-(Me)N-O-TAGa (**5**) (4.10 g, 3.6 mmol) was converted to Fmoc-Val-Asn-Ala-(Me)N-O-TAGa (**S14**) (5.27 g, quant.) as a white powder.  $[\alpha]_{\text{D}}^{24.5} = -0.1$  (c 0.1,  $\text{CHCl}_3$ ); mp 174–179 °C;  $^1\text{H}$  NMR (500 MHz,  $\text{CDCl}_3$ , Signals were complex due to rotamers of the peptide bonds.)  $\delta$  7.75 (1H, br s), 7.73 (2H, dd,  $J = 7.5, 4.0$  Hz), 7.63 (1H, br d,  $J = 7.0$  Hz), 7.58 (2H, br d,  $J = 7.5$  Hz), 7.36 (2H, app q,  $J = 7.0$  Hz), 7.28 (2H, br t,  $J = 7.5$  Hz), 6.55 (2H, s), 6.30 (1H, br s), 5.85 (1H, br s), 5.75 (1H, br d,  $J = 8.0$  Hz), 4.93-4.77 (4H, br m, overlapped), 4.40 (1H, br dd,  $J = 10.5, 8.0$  Hz), 4.31 (1H, br dd,  $J = 10.5, 7.5$  Hz), 4.19 (1H, br t,  $J = 7.0$  Hz), 4.14 (1H, br t,  $J = 7.0$  Hz), 3.97-3.92 (6H, br m, overlapped), 3.17 (3H, s), 2.83 (1H, br m), 2.62 (1H, br m), 2.16 (1H, br m), 1.81-1.71 (6H, m, overlapped), 1.49-1.43 (6H, br m, overlapped), 1.35-1.22 (87H, br m, overlapped), 0.99 (3H, d,  $J = 6.0$  Hz), 0.94 (3H, d,  $J = 7.0$  Hz), 0.88 (9H, t,  $J = 7.0$  Hz);  $^{13}\text{C}$  NMR (125 MHz,  $\text{CDCl}_3$ , Signals were complex due to the rotamers.)  $\delta$  173.6, 173.4, 171.6, 170.2, 156.7, 153.4, 144.0, 143.9, 141.4, 138.8, 129.3, 127.8, 127.22, 127.18, 125.30, 125.25, 120.07, 120.05, 107.7, 73.6, 69.3, 67.3, 60.4, 49.8, 47.3, 46.4, 37.1, 34.0, 32.1, 31.5, 30.5, 29.9-29.5 (many signals overlapped), 26.3, 22.8, 19.4, 17.9, 17.6, 14.3; IR (KBr)  $\nu$  ( $\text{cm}^{-1}$ ) 3272, 2917, 2849, 1639, 1468, 1247, 1120, 719; HRMS (FAB, NBA + NaI matrix) Calcd. for  $\text{C}_{89}\text{H}_{149}\text{O}_{10}\text{N}_5\text{Na}$ : 1471.1202 ( $[\text{M} + \text{Na}]^+$ ), Found: 1471.0200.

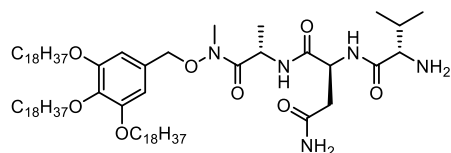

#### Val-Asn-Ala-(Me)N-O-TAGa (**6**)

Following the general procedure described for Fmoc deprotection, Fmoc-Val-Asn-Ala-(Me)N-O-TAGa (**S14**) (5.21 g, 3.6 mmol) was converted to Val-Asn-Ala-(Me)N-O-TAGa (**6**) (4.41 g, quant.) as a white powder.  $[\alpha]_{\text{D}}^{24.6} = -2.8$  (c 0.1,  $\text{CHCl}_3$ ); mp 81–83 °C;  $^1\text{H}$  NMR (500 MHz,  $\text{CDCl}_3$ , Signals were complex due to rotamers of the peptide bonds.)  $\delta$  8.40 (1H, d,  $J = 8.0$  Hz), 7.66 (1H, d,  $J = 7.0$  Hz), 6.57 (2H, s), 6.47 (1H, br s), 5.75 (1H, br s), 4.92-4.77 (4H, br m, overlapped), 3.99-3.92 (6H, br m, overlapped), 3.26 (1H, br d,  $J = 3.0$  Hz), 3.18 (3H, s), 2.83 (1H, m), 2.63 (1H, m), 2.24 (1H, m), 1.82-1.70 (6H, m, overlapped), 1.49-1.43 (6H, br m, overlapped), 1.37-1.22 (87H, br m, overlapped), 0.98 (3H, d,  $J = 7.0$  Hz), 0.87 (9H, t,  $J = 7.5$  Hz), 0.83 (3H, d,  $J = 6.5$  Hz);  $^{13}\text{C}$  NMR (125 MHz,  $\text{CDCl}_3$ , Signals were complex due to the rotamers.)  $\delta$  175.11, 175.05, 173.5, 173.41, 173.36, 170.6, 170.5, 153.4, 138.7, 129.3, 107.7, 73.6, 69.3, 60.3, 49.5, 49.4, 46.45, 46.35, 37.8, 34.0, 32.1, 31.2, 30.5, 29.9-29.5 (many signals overlapped), 26.3, 22.8, 19.8, 17.6, 16.3, 14.2; IR (KBr)  $\nu$  ( $\text{cm}^{-1}$ ) 3277, 2916, 2849, 1637, 1468, 1236, 1121, 720; HRMS (FAB, NBA matrix) Calcd. for  $\text{C}_{74}\text{H}_{140}\text{O}_8\text{N}_5$ : 1227.0702 ( $[\text{M} + \text{H}]^+$ ), Found: 1227.0693.

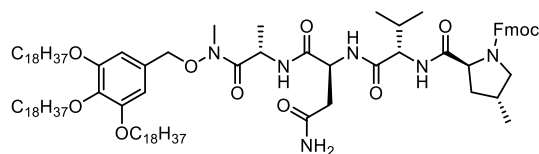

#### Fmoc-4-MePro-Val-Asn-Ala-(Me)N-O-TAGa (**S15**)

Following the general procedure described for condensation, Val-Asn-Ala-(Me)N-O-TAGa (**6**) (4.40 g, 3.6 mmol) was converted to Fmoc-4-MePro-Val-Asn-Ala-(Me)N-O-TAGa (**S15**) (5.60 g, quant.) as a white powder.  $[\alpha]_{\text{D}}^{24.8} = -17.7$  (c 0.1,  $\text{CHCl}_3$ ); mp 169–171 °C;  $^1\text{H}$  NMR (500 MHz,  $\text{CDCl}_3$ , Signals were broad and complex due to the rotamers. Those derived from minor rotamers were not described here.)  $\delta$  7.76 (2H, br d,  $J = 7.5$  Hz), 7.70 (1H, br d,  $J = 7.5$  Hz), 7.58 (2H, br d,  $J = 7.0$  Hz), 7.56 (1H, br m), 7.39 (2H, br t,  $J$



= 7.5 Hz), 7.31 (2H, td,  $J$  = 7.5, 1.5 Hz), 6.57 (2H, br s), 6.45 (1H, br s), 5.93 (1H, br s), 5.51 (1H, ap p br d,  $J$  = 48 Hz), 4.92 (1H, br s), 4.86-4.78 (3H, m, overlapped), 4.46-4.33 (3H, br m, overlapped), 4.22 (1H, br t,  $J$  = 7.0 Hz), 3.97-3.92 (6H, m, overlapped), 3.65 (1H, br t,  $J$  = 8.5 Hz), 3.17 (3H, s), 2.95 (1H, br t,  $J$  = 10.0 Hz), 2.77 (1H, br m), 2.66 (1H, br m), 2.50-2.06 (4H, br m, overlapped), 1.81-1.70 (6H, m, overlapped), 1.65 (1H, br m), 1.49-1.43 (6H, br m, overlapped), 1.37-1.22 (87H, br m, overlapped), 1.06 (3H, br d,  $J$  = 6.5 Hz), 0.93 (3H, d,  $J$  = 7.0 Hz), 0.87 (12H, app t,  $J$  = 7.0 Hz);  $^{13}\text{C}$  NMR (125 MHz,  $\text{CDCl}_3$ , Signals were broad and complex due to the rotamers. Those derived from minor rotamers were not described here.)  $\delta$  173.4 (two signals), 172.4, 171.3, 170.2, 156.3, 153.4, 144.0, 143.8, 141.4, 138.7, 129.4, 127.9, 127.2, 125.1, 120.1, 107.7, 73.6, 69.3, 68.1, 61.3, 58.7, 54.0, 49.9, 47.2, 46.3, 37.2, 36.7, 34.1, 32.7, 32.0, 30.9, 30.5, 29.9-29.5 (many signals overlapped), 26.3, 22.8, 19.5, 17.8, 17.7, 17.3, 14.2; IR (KBr)  $\nu$  ( $\text{cm}^{-1}$ ) 3272, 2916, 2849, 1661, 1638, 1468, 1236, 1122, 739, 720; HRMS (FAB, NBA + NaI matrix) Calcd. for  $\text{C}_{95}\text{H}_{158}\text{O}_{11}\text{N}_6\text{Na}$ : 1582.1886 ([M + Na] $^+$ ), Found: 1582.1896.

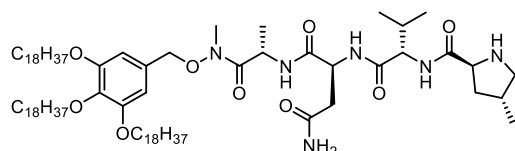

#### 4-MePro-Val-Asn-Ala-(Me)N-O-TAGa (**7**)

Following the general procedure described for Fmoc deprotection, Fmoc-4-MePro-Val-Asn-Ala-(Me)N-O-TAGa (**S15**) (5.55 g, 3.6 mmol) was converted to 4-MePro-Val-Asn-Ala-(Me)N-O-TAGa (**7**) (4.76 g, quant.) as a white powder.  $[\alpha]_D^{24.9} = -9.1$  (c 0.1,  $\text{CHCl}_3$ ); mp 100–102  $^{\circ}\text{C}$ ;  $^1\text{H}$  NMR (500 MHz,  $\text{CDCl}_3$ , Signals were broad and complex due to the rotamers. Those derived from minor rotamers were not described here.)  $\delta$  8.31 (1H, d,  $J$  = 8.5 Hz), 7.81 (1H, br s), 7.61 (1H, d,  $J$  = 6.5 Hz), 6.60 (1H, br s), 6.57 (2H, s), 5.88 (1H, br s), 4.91-4.74 (4H, br m, overlapped), 4.26 (1H, br m), 4.00-3.91 (6H, m, overlapped), 3.81 (1H, br d,  $J$  = 9.0 Hz), 3.39 (1H, br m), 3.17 (3H, s), 3.08 (1H, br m), 2.81-2.55 (3H, br m, overlapped), 2.30-2.03 (3H, br m, overlapped), 1.81-1.63 (6H, m, overlapped), 1.49-1.43 (6H, br m, overlapped), 1.35-1.22 (87H, br m, overlapped), 0.99 (3H, d,  $J$  = 6.0 Hz), 0.95 (3H, d,  $J$  = 6.5 Hz), 0.91 (3H, d,  $J$  = 7.0 Hz), 0.87 (9H, t,  $J$  = 7.0 Hz);  $^{13}\text{C}$  NMR (125 MHz,  $\text{CDCl}_3$ , Signals were broad and complex due to the rotamers. Those derived from minor rotamers were not described here.)  $\delta$  176.4, 173.6, 173.5, 171.6, 170.4, 153.4, 138.7, 129.4, 107.7, 73.6, 69.3, 60.4, 58.1, 54.7, 54.2, 49.9, 48.7, 46.3, 39.0, 36.9, 34.1, 33.3, 32.1, 30.8, 30.5, 29.9-29.5 (many signals overlapped), 26.3, 22.8, 19.6, 17.9, 17.58, 17.56, 14.2; IR (KBr)  $\nu$  ( $\text{cm}^{-1}$ ) 3270, 2916, 2849, 1635, 1468, 1236, 1121, 720; HRMS (FAB, NBA matrix) Calcd. for  $\text{C}_{80}\text{H}_{149}\text{O}_9\text{N}_6$ : 1338.1386 ([M + H] $^+$ ), Found: 1338.1384.

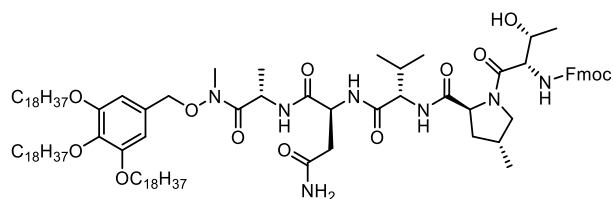

#### Fmoc-Thr-4-MePro-Val-Asn-Ala-(Me)N-O-TAGa (**S16**)

Following the general procedure described for condensation, 4-MePro-Val-Asn-Ala-(Me)N-O-TAGa (**7**) (4.70 g, 3.5 mmol) was converted to Fmoc-Thr-4-MePro-Val-Asn-Ala-(Me)N-O-TAGa (**S16**) (5.84 g, quant.) as a white powder.  $[\alpha]_D^{25.0} = -22.8$  (c 0.1,  $\text{CHCl}_3$ ); mp 151–154  $^{\circ}\text{C}$ ;  $^1\text{H}$  NMR (500 MHz,  $\text{CDCl}_3$ , Signals were broad and complex due to the rotamers. Those derived from minor rotamers were not described here.)  $\delta$  7.80-7.71 (3H, br m, overlapped), 7.59 (2H, br d,  $J$  = 7.0 Hz), 7.37 (2H, br t,  $J$  = 7.5 Hz), 7.32-7.28 (3H, br m, overlapped), 7.13 (1H, br d,  $J$  = 9.5 Hz), 6.95 (1H, br s), 6.57 (2H, s), 6.31-6.22 (2H, br m, overlapped), 5.01-4.95 (2H, br m, overlapped), 4.84 (1H, d,  $J$  = 10.5 Hz), 4.79 (1H, d,  $J$  = 10.5 Hz), 4.70 (1H, dd,  $J$  = 9.5, 3.5 Hz), 4.63 (1H, dd,  $J$  = 9.5, 4.0 Hz), 4.56 (1H, br m), 4.46 (1H, dd,  $J$  = 11.0, 7.5 Hz), 4.35 (1H, dd,  $J$  = 10.5, 7.0 Hz), 4.30 (1H, br m), 4.19 (1H, t,  $J$  = 6.5 Hz), 4.03 (1H, br t,  $J$  = 8.0 Hz), 3.97-3.92 (6H, m, overlapped), 3.32 (1H, br t,  $J$  = 9.0 Hz), 3.17 (3H, s), 2.81-2.69 (2H, br m, overlapped), 2.47 (1H, br m), 2.24-2.16 (2H, br m, overlapped), 1.93 (1H, m), 1.80-1.70 (6H, m, overlapped), 1.49-1.42 (6H, br m, overlapped), 1.35-1.22 (90H, br m, overlapped), 1.09 (3H, d,  $J$  = 6.0 Hz), 0.94 (3H, d,  $J$  = 6.5 Hz), 0.87 (12H, app t,  $J$  = 7.0 Hz);  $^{13}\text{C}$  NMR (125 MHz,  $\text{CDCl}_3$ , Signals were broad and complex due to the rotamers. Those derived from minor rotamers were not described here.)  $\delta$  173.9, 173.3, 172.2, 171.7, 171.3, 169.9, 156.4, 153.4, 143.9, 143.8, 141.4, 138.7, 129.5, 127.9, 127.2, 125.21, 125.16, 120.1, 107.7, 73.6, 69.3, 68.0, 67.0, 61.5, 58.1, 57.0, 54.6, 50.5, 47.3, 46.2, 42.3, 37.8, 37.1, 34.2, 33.0, 32.1, 31.0, 30.5, 29.9-29.5 (many signals overlapped), 26.3, 23.6, 22.8, 19.5, 18.8, 18.0, 17.9, 17.4, 14.3; IR (KBr)  $\nu$  ( $\text{cm}^{-1}$ ) 3286, 2917, 2849, 1638, 1467, 1439, 1236, 1119, 720; HRMS (FAB, NBA + NaI matrix) Calcd. for  $\text{C}_{99}\text{H}_{165}\text{O}_{13}\text{N}_7\text{Na}$ : 1683.2363 ([M + Na] $^+$ ), Found: 1683.2360.

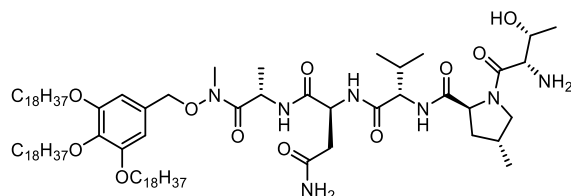

#### Thr-4-MePro-Val-Asn-Ala-(Me)N-O-TAGa (**8**)

Following the general procedure described for Fmoc deprotection, Fmoc-Thr-4-MePro-Val-Asn-Ala-(Me)N-O-TAGa (**S16**) (5.78 g, 3.5 mmol) was converted to Thr-4-MePro-Val-Asn-Ala-(Me)N-O-TAGa (**8**) (5.01 g, quant.) as a white powder.  $[\alpha]_D^{25.1} = -35.3$  (c 0.1,  $\text{CHCl}_3$ ); mp ca. 190  $^{\circ}\text{C}$  (decomp.);  $^1\text{H}$  NMR (500 MHz,  $\text{CDCl}_3$ , Signals were broad and complex due to the rotamers. Those derived from minor rotamers were not described here.)  $\delta$  7.34-7.30 (3H, br m, overlapped), 7.17 (1H, br s), 6.81 (1H, br s), 6.58 (2H, s), 4.97 (1H, br m), 4.93 (1H, dd,  $J$  = 9.5, 4.5 Hz), 4.85 (1H, d,  $J$  = 10.0 Hz), 4.79 (1H, d,  $J$  = 10.5 Hz), 4.66-4.58 (2H, br m), 4.11 (1H, br m), 3.98-3.92 (6H, m, overlapped), 3.80 (1H, br m), 3.30 (1H, br m), 3.17 (3H, s), 3.16 (1H, br m), 2.78-2.63 (2H, br m, overlapped), 2.46 (1H, br m), 2.22 (1H, m), 2.12 (2H, m), 1.83 (1H, m, overlapped), 1.81-1.70 (6H, m, overlapped), 1.49-1.43 (6H, br m, overlapped), 1.37-1.22 (90H, br m, overlapped), 1.09 (3H, d,  $J$  = 6.0 Hz), 0.94 (3H, d,  $J$  = 7.0 Hz), 0.87 (12H, app t,  $J$  = 7.0 Hz);  $^{13}\text{C}$  NMR (125

MHz, CDCl<sub>3</sub>, Signals were broad and complex due to the rotamers. Those derived from minor rotamers were not described here.)  $\delta$  174.2, 173.3 (two signals), 172.4, 171.5, 170.1, 153.4, 138.8, 129.4, 107.7, 73.6, 70.1, 69.3, 61.7, 57.7, 56.4, 54.5, 50.5, 46.0, 37.6, 37.2, 34.1, 32.9, 32.1, 30.5, 29.9-29.5 (many signals overlapped), 26.3, 22.8, 19.5, 18.0, 17.9, 17.5, 17.3, 14.2; IR (KBr)  $\nu$  (cm<sup>-1</sup>) 3292, 2917, 2849, 1644, 1468, 1237, 1117, 720; HRMS (FAB, NBA matrix) Calcd. for C<sub>84</sub>H<sub>155</sub>O<sub>11</sub>N<sub>7</sub>: 1439.1863 ([M + H]<sup>+</sup>), Found: 1439.1868.

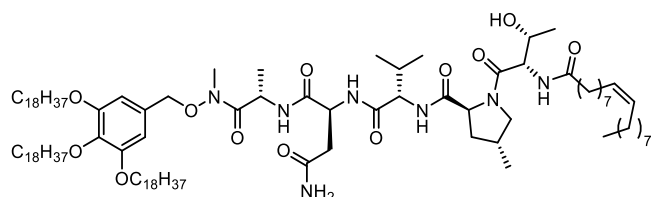

#### Oleic acid-Thr-4-MePro-Val-Asn-Ala-(Me)N-O-TAGa (**9**)

Following the general procedure described for condensation using oleic acid instead of Fmoc protected amino acid, Thr-4-MePro-Val-Asn-Ala-(Me)N-O-TAGa (**8**) (2.97 g, 2.1 mmol) was converted to oleic acid-Thr-4-MePro-Val-Asn-Ala-(Me)N-O-TAGa (**9**) (3.52 g, quant.) as a white powder. Advanced Marfey's method for all the amino acid residues after complete acid hydrolysis in the same way as described above in "Screening of condensation reagents to suppress the epimerization in our previous report" section confirmed that no epimerization occurred.  $[\alpha]_D^{25.1} = -11.9$  (c 0.1, CHCl<sub>3</sub>); mp 151–152 °C; <sup>1</sup>H NMR (500 MHz, CDCl<sub>3</sub>)  $\delta$  7.78 (1H, br d, *J* = 8.0 Hz), 7.30 (1H, br d, *J* = 7.5 Hz), 7.09 (1H, d, *J* = 9.5 Hz), 7.03 (1H, br s), 6.77 (1H, br d, *J* = 8.5 Hz), 6.57 (2H, s), 6.37 (1H, br s), 5.37-5.29 (2H, m, overlapped), 4.98 (1H, dd, *J* = 7.5, 4.0 Hz), 4.95-4.89 (2H, br m, overlapped), 4.85 (1H, d, *J* = 10.5 Hz), 4.80 (1H, d, *J* = 10.5 Hz), 4.59 (1H, dd, *J* = 9.0, 4.0 Hz), 4.55 (1H, dd, *J* = 9.0, 6.5 Hz), 4.46 (1H, d, *J* = 6.0 Hz), 4.29 (1H, m), 4.03 (1H, dd, *J* = 9.5, 7.5 Hz), 3.98-3.92 (6H, m, overlapped), 3.36 (1H, br t, *J* = 9.5 Hz), 3.18 (3H, s), 2.79 (1H, m), 2.70 (1H, m), 2.46 (1H, m), 2.34 (2H, t, *J* = 8.0 Hz), 2.20-2.15 (2H, br m, overlapped), 2.20-1.98 (3H, m, overlapped), 1.90 (1H, m), 1.82-1.72 (6H, m, overlapped), 1.66-1.58 (2H, br m, overlapped), 1.49-1.43 (6H, br m, overlapped), 1.37-1.22 (110H, br m, overlapped), 1.09 (3H, d, *J* = 7.0 Hz), 0.94 (3H, d, *J* = 6.5 Hz), 0.89-0.86 (15H, m, overlapped); <sup>13</sup>C NMR (125 MHz, CDCl<sub>3</sub>)  $\delta$  173.8, 173.4 (two signals), 172.2, 171.7, 171.5, 169.9, 153.5, 138.8, 130.1, 129.9, 129.4, 107.7, 73.6, 69.4, 67.9, 61.5, 58.0, 54.7, 50.6, 46.2, 37.7, 37.1, 36.6, 34.1, 33.0, 32.1, 31.3, 30.5, 29.9-29.3 (many signals overlapped), 27.4, 27.3, 26.3, 25.7, 22.8, 19.5, 18.9, 17.93, 17.86, 17.3, 14.3; IR (KBr)  $\nu$  (cm<sup>-1</sup>) 3279, 2917, 2849, 1640, 1438, 1238, 1121, 719; HRMS (FAB, NBA + NaI matrix) Calcd. for C<sub>102</sub>H<sub>187</sub>O<sub>12</sub>N<sub>7</sub>Na: 1725.4135 ([M + Na]<sup>+</sup>), Found: 1725.4131.

#### Reduction to afford the aldehyde

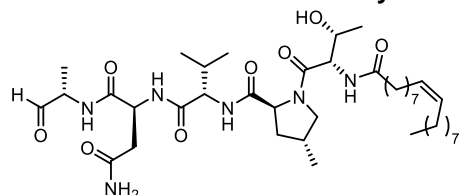

#### Oleic acid-Thr-4-MePro-Val-Asn-Ala-H (**2**)

To a solution of **9** (850 mg, 0.50 mmol, 1.0 eq) in dehydrated THF (50 mL, 0.01 M) was added dropwise 1.0 M LiAlH(O*t*-Bu)<sub>3</sub> in dehydrated THF (4.99 mL, 10 eq, prepared by the procedure described in the literature.<sup>[6]</sup>) at room temperature. After stirring for 1 h at room temperature, the reaction mixture was then treated with aqueous 1 N HCl (25 mL) at 0 °C to quench the excess LiAlH(O*t*-Bu)<sub>3</sub>. After stirring for 10 min at room temperature, MeOH (250 mL) was added. The resulting heterogeneous solution was stirred for a further 30 min at room temperature, and the precipitate was filtered and washed with additional MeOH. The filtrate was roughly concentrated in vacuo, poured into a separatory funnel containing aqueous 1 N HCl (20 mL), and extracted with CHCl<sub>3</sub> (3 × 20 mL). The combined organic extracts were dried with Na<sub>2</sub>SO<sub>4</sub>, filtered, and concentrated in vacuo. The residue was purified by flash column chromatography on silica gel (CHCl<sub>3</sub>/MeOH = 50/1 to 10/1 as eluent) to afford aldehyde **2** (240.0 mg, 63%) as a white powder and MePro-Thr amide bond-cleaved alcohol **S17** (37.5 mg, 20% yield) as a colorless oil (the structure is shown below).  $[\alpha]_D^{24.6} = -33.8$  (c 0.1, DMSO),  $[\alpha]_D^{24.6} = -29.6$  (c 0.1, CHCl<sub>3</sub>); mp 170–175 °C; <sup>1</sup>H NMR (500 MHz, DMSO-*d*<sub>6</sub>, Signals derived from the diastereomer of the  $\alpha$ -position of alaninal moiety were not observed at all.)  $\delta$  9.34 (1H, s), 8.14 (1H, d, *J* = 6.5 Hz), 8.11 (1H, d, *J* = 7.5 Hz), 7.87 (2H, app dd, *J* = 8.0, 1.5 Hz), 7.37 (1H, br s), 6.93 (1H, br s), 5.35-5.29 (2H, m, overlapped), 4.67 (1H, d, *J* = 6.0 Hz), 4.55-4.47 (2H, m, overlapped), 4.41 (1H, t, *J* = 7.5 Hz), 4.09-3.98 (2H, m, overlapped), 3.83-3.76 (2H, m, overlapped), 3.27 (1H, t, *J* = 9.5 Hz), 2.55-2.46 (2H, m, overlapped with solvent residual signals), 2.34 (1H, m), 2.17-2.06 (2H, m, overlapped), 2.01-1.94 (6H, m, overlapped), 1.65 (1H, m), 1.48-1.42 (2H, m, overlapped), 1.32-1.19 (20H, br m, overlapped), 1.14 (3H, d, *J* = 7.5 Hz), 1.08 (3H, d, *J* = 6.0 Hz), 0.97 (3H, d, *J* = 7.0 Hz), 0.86-0.82 (9H, m, overlapped); <sup>13</sup>C NMR (125 MHz, DMSO-*d*<sub>6</sub>)  $\delta$  201.4, 172.2, 171.9, 171.4, 171.3, 170.6, 169.5, 129.7, 66.9, 59.2, 58.0, 56.2, 54.0, 53.9, 49.5, 36.8, 36.5, 34.9, 32.0, 31.3, 30.4, 29.2-28.6 (many signals overlapped), 26.64, 26.60, 25.3, 22.1, 19.4, 19.1, 18.0, 17.2, 14.0, 13.6; IR (KBr)  $\nu$  (cm<sup>-1</sup>) 3285, 2924, 2853, 1736, 1639, 1542, 1426, 1235; HRMS (ESI<sup>+</sup>) Calcd. for C<sub>40</sub>H<sub>70</sub>N<sub>6</sub>O<sub>8</sub>Na: 785.5153 ([M + Na]<sup>+</sup>), Found: 785.5151.

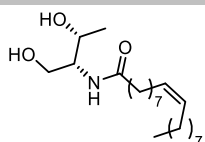

#### MePro-Thr amide bond-cleaved alcohol **S17**

$[\alpha]_D^{25.2} = -25.7$  (c 0.1,  $\text{CHCl}_3$ );  $^1\text{H NMR}$  (500 MHz,  $\text{DMSO}-d_6$ )  $\delta$  7.24 (1H, br d,  $J = 9.0$  Hz), 5.35-5.28 (2H, m, overlapped), 4.55-4.51 (2H, br m, overlapped), 3.85 (1H, br m), 3.62 (1H, m), 3.42 (1H, br m), 3.29 (1H, br m), 2.15-2.04 (2H, m, overlapped), 2.02-1.93 (4H, br m, overlapped), 1.51-1.43 (2H, br m, overlapped), 1.30-1.20 (20H, br m, overlapped), 0.97 (3H, d,  $J = 6.0$  Hz), 0.85 (3H, t,  $J = 7.0$  Hz);  $^{13}\text{C NMR}$  (125 MHz,  $\text{DMSO}-d_6$ )  $\delta$  172.4, 129.6, 64.2, 60.6, 55.4, 35.4, 31.3, 29.2-28.6 (many signals overlapped), 26.64, 26.60, 25.5, 22.1, 20.1, 14.0; IR (KBr)  $\nu$  ( $\text{cm}^{-1}$ ) 3294, 2923, 2853, 1632, 1541, 1458, 1065; HRMS (ESI<sup>+</sup>) Calcd. for  $\text{C}_{22}\text{H}_{43}\text{NO}_3\text{Na}$ : 392.3141 ([M + Na]<sup>+</sup>), Found: 392.3139.

#### Recovery of benzyloxy methyl amine anchor molecule **3**

To a solution of **9** (50.0 mg, 0.029 mmol, 1.0 eq) in dehydrated THF (2.9 mL, 0.01 M) was added dropwise 1.0 M  $\text{LiAlH}(\text{t-BuO})_3$  in dehydrated THF (0.293 mL, 10 eq, prepared by the procedure described in the literature.<sup>[6]</sup>) at room temperature. After stirring for 1 h at room temperature, the reaction mixture was then treated with aqueous 1 N HCl (1.5 mL) at 0 °C to quench the excess  $\text{LiAlH}(\text{t-BuO})_3$ . After stirring for 10 min at room temperature, MeOH (14.7 mL) was added. The resulting heterogeneous solution was stirred for a further 30 min at room temperature, and the precipitate was filtered and washed with additional MeOH to recover benzyloxy methyl amine anchor molecule **3** as its hydrogen chloride salt form (28.8 mg, quant.). Aldehyde **2** was obtained from the filtrate by the same procedure described above (13.7 mg, 61%). The  $^1\text{H NMR}$  spectrum of this recovered **3** showed clear match with the data of newly prepared **3** in  $\text{CDCl}_3$  + small amount of conc. HCl (see NMR spectra section below).

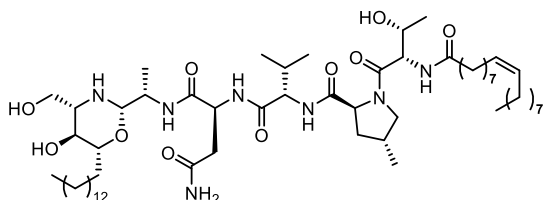

#### Kozupeptin A (**1**)

To a solution of **2** (17.5 mg, 0.023 mmol, 1.0 eq) in  $\text{CHCl}_3$  (1.2 mL) was added phytosphingosine (8.7 mg, 0.028 mmol, 1.2 eq) at room temperature. After stirring for 6 h at room temperature, the reaction mixture was concentrated in vacuo. The residue was purified by flash column chromatography on silica gel ( $\text{CHCl}_3/\text{MeOH}$ ) to afford kozupeptin A (**1**) (23.1 mg, 95%) as a white powder. All physical data for **1** obtained here matched with the data in our previous paper.<sup>[2]</sup> In  $^1\text{H NMR}$  spectrum, signals derived from the diastereomer of the  $\alpha$ -position of alaninal moiety were not observed at all. The amide-H region was shown below (upper: derived from this method, lower: derived from the previous report method using HBTU as a condensation reagent to get Weinreb amide **S2**).

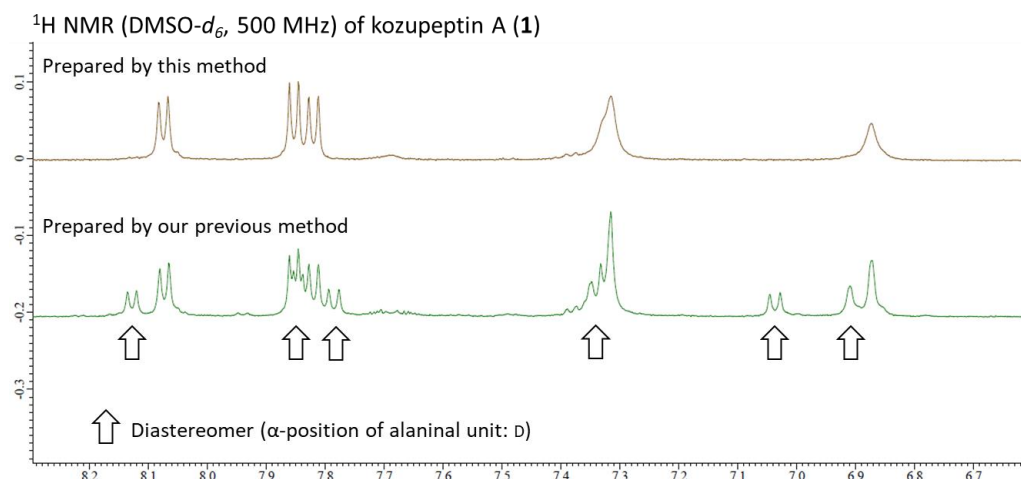

## Use of the reductants having bulkier alkoxy group

Table S2. Screening of the reductant

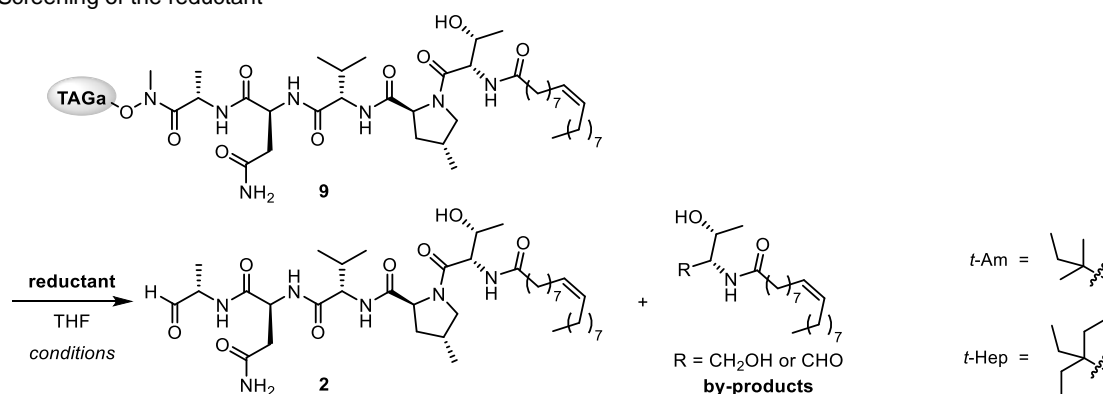

| entry | reductant                                      | temperature  | isolated yield of <b>2</b> (%) | note                                                                                                         |
|-------|------------------------------------------------|--------------|--------------------------------|--------------------------------------------------------------------------------------------------------------|
| 1     | LiAlH <sub>4</sub> (1.8 eq)                    | 0 °C         | 42                             | Full conversion. <b>By-products</b> were obtained together in 20-30% yield.                                  |
| 2     | Red-Al® (9.0 eq)                               | 0 °C         | 37                             | Full conversion. <b>By-products</b> were obtained together in 20-30% yield.                                  |
| 3     | LiAlH(O <sup>t</sup> Bu) <sub>3</sub> (10 eq)  | rt           | 63                             | 850 mg of substrate <b>9</b> was used. Full conversion. <b>By-product</b> alcohol was obtained in 20% yield. |
| S3-1* | LiAlH(O <sup>t</sup> Am) <sub>3</sub> (10 eq)  | rt           | 62                             | Full conversion. <b>By-product</b> alcohol was obtained in around 20% yield.                                 |
| S3-2* | LiAlH(O <sup>t</sup> Hep) <sub>3</sub> (10 eq) | rt           | 58                             | Full conversion. <b>By-product</b> alcohol was obtained in around 20% yield.                                 |
| 4     | DIBAL (10 eq)                                  | −78 °C to rt | not obtained                   | No reaction to decomposition.                                                                                |
| 5     | LiBH <sub>4</sub> (4.0 eq)                     | rt           | trace                          | <b>By-product</b> alcohol was observed as a major product in TLC analysis.                                   |
| 6     | K-selectride® (30 eq)                          | rt to 40 °C  | not obtained                   | No reaction to decomposition.                                                                                |
| 7     | LiBHEt <sub>3</sub> (7.0 eq)                   | 0 °C         | 38                             | Full conversion. <b>By-products</b> were obtained together in 20-30% yield.                                  |

Unless noted, 40.0 or 50.0 mg of **9** in THF (0.01 M) was used. \*Prepared by the procedure described in the literature.<sup>[6]</sup>

## Use of a model substrate

Scheme S3. Use of a model substrate without Thr-Pro amide bond

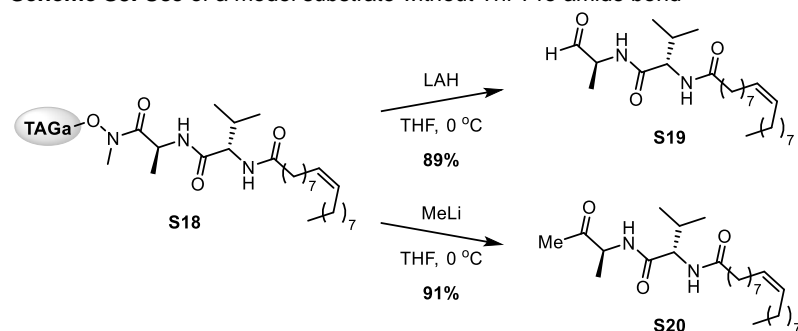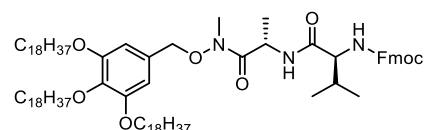

Fmoc-Val-Ala-(Me)N-O-TAGa (**S21**)

Following the general procedure described for condensation, Ala-(Me)N-O-TAGa (**4**) (817 mg, 0.81 mmol) was converted to Fmoc-Val-Ala-(Me)N-O-TAGa (**S21**) (1.08 g, quant.) as a white powder.  $[\alpha]_D^{24.3} = -13.8$  (c 0.1, CHCl<sub>3</sub>); mp 65–69 °C; <sup>1</sup>H NMR (500 MHz, CDCl<sub>3</sub>) δ 7.76 (2H, d, *J* = 7.5 Hz), 7.61 (2H, br dd, *J* = 7.5, 4.0 Hz), 7.39 (2H, br td, *J* = 7.5, 2.0 Hz), 7.31 (2H, m), 6.63 (1H, br s, overlapped), 6.60 (2H, s), 5.43 (1H, br d, *J* = 9.0 Hz), 5.05 (1H, br m), 4.85 (2H, br s), 4.45 (1H, dd, *J* = 10.5, 7.5 Hz), 4.36 (1H, dd, *J* = 11.0, 6.5 Hz), 4.23 (1H, t, *J* = 7.0 Hz), 4.07 (1H, br dd, *J* = 8.5, 6.5 Hz), 3.99-3.94 (6H, m, overlapped), 3.21 (3H, s), 2.13 (1H, m), 1.82-1.71 (6H, m, overlapped), 1.50-1.44 (6H, br m, overlapped), 1.36-1.22 (87H, br m, overlapped), 0.97 (3H, d, *J* = 6.5 Hz), 0.94 (3H, d, *J* = 7.0 Hz), 0.88 (9H, t, *J* = 7.5 Hz); <sup>13</sup>C NMR (125 MHz, CDCl<sub>3</sub>, Signals were complex due to the rotamers.) δ 173.4, 170.8, 156.4, 153.5, 144.1, 143.9, 141.4, 138.9, 129.1, 127.8, 127.2, 125.3, 125.2, 120.11, 120.09, 107.8, 77.6, 73.6, 69.3, 67.2, 60.3, 47.3, 46.0, 34.1, 32.1, 31.7, 30.5, 29.9-29.5 (many signals overlapped), 26.3, 22.8, 19.3, 18.3, 17.9, 14.3; IR (KBr) ν (cm<sup>−1</sup>) 3290, 2916,

2849, 1644, 1468, 1237, 1119, 739, 721; HRMS (FAB, NBA + NaI matrix) Calcd. for  $C_{85}H_{143}N_3O_8Na$ : 1357.0773 ( $[M + Na]^+$ ), Found: 1357.0785.

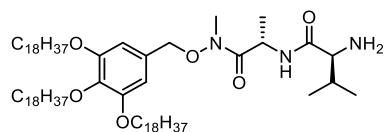

**Val-Ala-(Me)N-O-TAGa (S22)**

Following the general procedure described for Fmoc deprotection, Fmoc-Val-Ala-(Me)N-O-TAGa (**S21**) (965 mg, 0.72 mmol) was converted to Val-Ala-(Me)N-O-TAGa (**S22**) (804 mg, quant.) as a white powder.  $[\alpha]_D^{24.4} = -10.0$  (c 0.1,  $CHCl_3$ ); mp 58–59 °C;  $^1H$  NMR (500 MHz,  $CDCl_3$ )  $\delta$  7.82 (1H, br d,  $J = 8.0$  Hz), 6.62 (2H, s), 5.10 (1H, br m), 4.89 (1H, d,  $J = 10.0$  Hz), 4.84 (1H, d,  $J = 10.5$  Hz), 4.01–3.91 (6H, m, overlapped), 3.25 (1H, d,  $J = 4.0$  Hz), 3.20 (3H, s), 2.26 (1H, m), 1.82–1.70 (6H, br m, overlapped), 1.49–1.43 (6H, br m, overlapped), 1.36–1.22 (87H, br m, overlapped), 1.00 (3H, d,  $J = 7.0$  Hz), 0.89–0.85 (12H, m, overlapped);  $^{13}C$  NMR (125 MHz,  $CDCl_3$ , Signals were complex due to the rotamers.)  $\delta$  173.94, 173.87, 153.5, 138.8, 129.3, 107.9, 77.7, 73.6, 69.3, 60.3, 45.3, 34.0, 32.1, 31.2, 30.5, 29.9–29.5 (many signals overlapped), 26.3, 22.8, 19.8, 18.5, 16.4, 14.3; IR (KBr)  $\nu$  ( $cm^{-1}$ ) 2916, 2849, 1659, 1467, 1236, 1119, 720; HRMS (FAB, NBA matrix) Calcd. for  $C_{70}H_{134}O_6N_3$ : 1113.0273 ( $[M + H]^+$ ), Found: 1113.0282.

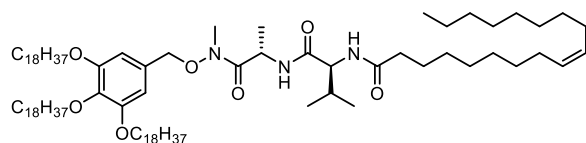

**Oleic acid-Val-Ala-(Me)N-O-TAGa (S18)**

Following the general procedure described for condensation using oleic acid instead of Fmoc protected amino acid, Val-Ala-(Me)N-O-TAGa (**S22**) (770 mg, 0.72 mmol) was converted to oleic acid-Val-Ala-(Me)N-O-TAGa (**S18**) (933 mg, 98%) as a white powder.  $[\alpha]_D^{24.4} = -11.6$  (c 0.1,  $CHCl_3$ ); mp 54–55 °C;  $^1H$  NMR (500 MHz,  $CDCl_3$ )  $\delta$  6.70 (1H, br d,  $J = 7.0$  Hz), 6.59 (2H, s), 6.11 (1H, br d,  $J = 7.5$  Hz), 5.36–5.29 (2H, m, overlapped), 5.01 (1H, br m), 4.83 (2H, s), 4.36 (1H, dd,  $J = 8.5, 6.5$  Hz), 3.99–3.93 (6H, m, overlapped), 3.20 (3H, s), 2.22 (2H, m), 2.07 (1H, m), 2.01–1.98 (3H, br m, overlapped), 1.82–1.70 (6H, m, overlapped), 1.68–1.59 (2H, br m, overlapped), 1.49–1.43 (6H, br m, overlapped), 1.36–1.22 (107H, br m, overlapped), 0.94 (3H, d,  $J = 7.0$  Hz), 0.92 (3H, d,  $J = 6.5$  Hz), 0.87 (12H, t,  $J = 7.0$  Hz);  $^{13}C$  NMR (125 MHz,  $CDCl_3$ , Signals were complex because of the rotamers.)  $\delta$  173.4, 173.2, 170.8, 153.5, 138.9, 130.1, 129.9, 129.2, 107.8, 77.6, 73.6, 69.3, 58.0, 45.9, 36.9, 34.1, 32.1, 32.0, 31.7, 30.5, 29.9–29.3 (many signals overlapped), 27.34, 27.30, 26.3, 25.9, 22.8, 19.3, 18.19, 18.16, 14.2; IR (KBr)  $\nu$  ( $cm^{-1}$ ) 3303, 2917, 2849, 1638, 1467, 1235, 1118, 721; HRMS (FAB, NBA + NaI matrix) Calcd. for  $C_{88}H_{165}N_3O_7Na$ : 1399.2545 ( $[M + Na]^+$ ), Found: 1399.2542.

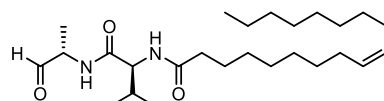

**Oleic acid-Val-Ala-H (S19)**

To a solution of **S18** (20.0 mg, 0.015 mmol, 1.0 eq) in dehydrated THF (1.8 mL, 0.008 M) was added dropwise 2.0 M  $LiAlH_4$  in dehydrated THF (8.7  $\mu$ L, 1.2 eq) at 0 °C. After stirring for 15 min at 0 °C, the reaction mixture was then treated with aqueous 1 N HCl (0.9 mL) at 0 °C to quench the excess  $LiAlH_4$ . After stirring for 10 min at room temperature, MeOH (9.0 mL) was added. The resulting heterogeneous solution was stirred for a further 30 min at room temperature, and the precipitate was filtered and washed with additional MeOH. The filtrate was roughly concentrated in vacuo, poured into a separatory funnel containing aqueous 1 N HCl (10 mL), and extracted with  $CHCl_3$  (3  $\times$  10 mL). The combined organic extracts were dried with  $Na_2SO_4$ , filtered, and concentrated in vacuo. The residue was purified by flash column chromatography on silica gel ( $CHCl_3/MeOH = 200/1$  to 20/1 as eluent) to afford aldehyde **S19** (5.6 mg, 89%) as a white powder.  $[\alpha]_D^{24.5} = -12.5$  (c 0.1,  $CHCl_3$ ); mp 96–99 °C;  $^1H$  NMR (500 MHz,  $DMSO-d_6$ , Signals were broad and complex due to the rotamers. Those derived from minor rotamers were not described here.)  $\delta$  9.37 (1H, s), 8.45 (1H, d,  $J = 6.0$  Hz), 7.83 (1H, d,  $J = 7.5$  Hz), 5.35–5.29 (2H, m, overlapped), 4.19 (1H, m), 4.07 (1H, m), 2.21–2.07 (2H, m, overlapped), 1.99–1.91 (5H, m, overlapped), 1.53–1.42 (2H, m, overlapped), 1.30–1.22 (20H, br m, overlapped), 1.16 (3H, d,  $J = 7.5$  Hz), 0.88–0.84 (9H, m, overlapped);  $^{13}C$  NMR (125 MHz,  $DMSO-d_6$ , Signals were broad and complex due to the rotamers. Those derived from minor rotamers were not described here.)  $\delta$  201.9, 173.2, 172.5, 130.5, 58.2, 54.7, 36.1, 32.2, 31.3, 30.0–29.5 (many signals overlapped), 27.53, 27.49, 26.3, 23.0, 20.1, 19.1, 14.9, 14.4; IR (KBr)  $\nu$  ( $cm^{-1}$ ) 3284, 2919, 2850, 1733, 1633, 1541, 1466, 1386, 693; HRMS (FAB, NBA matrix) Calcd. for  $C_{26}H_{49}O_3N_2$ : 437.3743 ( $[M + H]^+$ ), Found: 437.3747.

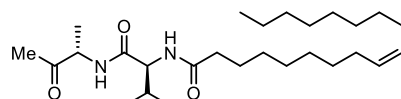

**Oleic acid-Val-Ala-Me (S20)**

To a solution of **S18** (20.0 mg, 0.015 mmol, 1.0 eq) in dehydrated THF (1.8 mL, 0.008 M) was added dropwise 1.11 M MeLi in dehydrated diethyl ether ( $Et_2O$ ) (131  $\mu$ L, 10 eq) at 0 °C. After stirring for 20 min at 0 °C, the reaction mixture was then treated with aqueous 1 N HCl (0.9 mL) at 0 °C to quench the excess MeLi. After stirring for 10 min at room temperature, MeOH (9.0 mL) was added. The resulting heterogeneous solution was stirred for a further 30 min at room temperature, and the precipitate was filtered and washed with additional MeOH. The filtrate was roughly concentrated in vacuo, poured into a separatory funnel containing aqueous 1 N HCl (10 mL), and extracted with  $CHCl_3$  (3  $\times$  10 mL). The combined organic extracts were dried with  $Na_2SO_4$ , filtered, and concentrated in vacuo. The residue was purified by PLC on silica gel ( $CHCl_3/MeOH = 10/1$ ) to afford methyl ketone **S20** (5.9 mg, 91%) as a white powder.  $[\alpha]_D^{24.5} = -9.0$  (c 0.1,  $CHCl_3$ ); mp 93–97 °C;  $^1H$  NMR (500 MHz,  $DMSO-d_6$ , Signals were broad and complex due to the rotamers.)  $\delta$  8.34–8.30 (1H, m), 7.84–7.79 (1H, m), 5.35–5.29 (2H, m, overlapped), 4.23–4.11 (2H, m, overlapped), 2.20–2.07 (2H, m, overlapped), 2.06 & 2.04 (3H, two s), 1.99–1.90 (5H, m, overlapped), 1.51–1.42 (2H, br m, overlapped), 1.30–1.22 (20H, br m, overlapped), 1.15 (3H, t,  $J = 7.0$  Hz), 0.87–0.83 (9H, m, overlapped);  $^{13}C$  NMR (125 MHz,  $DMSO-d_6$ , Signals were complex due

### Using TAGb-type anchor molecule

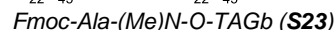

*Ala-(Me)N-O-TAGb* (**S24**)

*Fmoc-Asn-Ala-(Me)N-O-TAGb* (**S25**)

*Asn-Ala-(Me)N-O-TAGb* (**S26**)

14

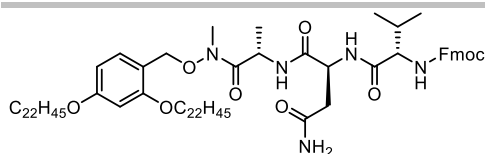

#### Fmoc-Val-Asn-Ala-(Me)N-O-TAGb (**S27**)

Following the general procedure described for condensation, Asn-Ala-(Me)N-O-TAGb (**S26**) (1.34 g, 1.4 mmol) was converted to Fmoc-Val-Asn-Ala-(Me)N-O-TAGb (**S27**) (1.66 g, 93%) as a white powder.  $[\alpha]_D^{24.5} = 9.6$  (c 0.1, CHCl<sub>3</sub>); mp 185–190 °C; <sup>1</sup>H NMR (500 MHz, CDCl<sub>3</sub>, Signals were broad and complex due to the rotamers.)  $\delta$  7.76–7.72 (3H, br m, overlapped), 7.60–7.57 (3H, br m, overlapped), 7.38–7.35 (2H, br m), 7.28 (2H, t,  $J = 7.5$  Hz), 7.20 (1H, d,  $J = 8.5$  Hz), 6.43–6.40 (2H, overlapped), 6.30 (1H, br s), 5.86 (1H, br s), 5.76 (1H, br d,  $J = 8.5$  Hz), 5.00–4.92 (2H, br m, overlapped), 4.86–4.77 (2H, br m, overlapped), 4.41–4.29 (2H, br m, overlapped), 4.21–4.14 (2H, br m, overlapped), 4.00–3.91 (4H, br m, overlapped), 3.20 (3H, br s), 2.83 (1H, br m), 2.63 (1H, br m), 2.16 (1H, br m), 1.81–1.73 (4H, br m, overlapped), 1.47–1.40 (4H, br m, overlapped), 1.35–1.22 (75H, br m, overlapped), 0.99 (3H, d,  $J = 6.5$  Hz), 0.95 (3H, d,  $J = 7.0$  Hz), 0.88 (6H, t,  $J = 7.5$  Hz); <sup>13</sup>C NMR (125 MHz, CDCl<sub>3</sub>, Signals were broad and complex due to the rotamers.)  $\delta$  173.5, 173.3, 171.6, 170.1, 161.6, 159.0, 156.7, 144.1, 143.9, 141.4, 132.9, 127.8, 127.22, 127.18, 125.32, 125.29, 120.1, 114.7, 104.8, 99.8, 71.6, 68.3, 67.2, 60.3, 49.8, 47.3, 46.4, 37.2, 33.5, 32.1, 31.5, 29.8–29.2 (many signals overlapped), 26.18, 26.16, 22.8, 19.4, 17.8, 17.7, 14.3; IR (KBr)  $\nu$  (cm<sup>-1</sup>) 3288, 2917, 2849, 1642, 1535, 1468, 1292, 1248, 1180, 1131, 1032, 740, 718; HRMS (FAB, NBA + NaI matrix) Calcd. for C<sub>79</sub>H<sub>129</sub>N<sub>5</sub>O<sub>9</sub>Na: 1314.9688 ([M + Na]<sup>+</sup>), Found: 1314.9697.

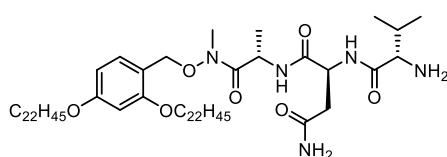

#### Val-Asn-Ala-(Me)N-O-TAGb (**S28**)

Following the general procedure described for Fmoc deprotection, Fmoc-Val-Asn-Ala-(Me)N-O-TAGb (**S27**) (1.61 g, 1.2 mmol) was converted to Val-Asn-Ala-(Me)N-O-TAGb (**S28**) (1.33 g, quant.) as a white powder.  $[\alpha]_D^{24.5} = 7.7$  (c 0.1, CHCl<sub>3</sub>); mp 101–102 °C; <sup>1</sup>H NMR (500 MHz, CDCl<sub>3</sub>)  $\delta$  8.39 (1H, br d,  $J = 7.5$  Hz), 7.61 (1H, br d,  $J = 7.5$  Hz), 7.22 (1H, d,  $J = 9.0$  Hz), 6.50 (1H, br s), 6.44–6.42 (2H, m, overlapped), 5.78 (1H, br s), 4.97–4.91 (2H, br m, overlapped), 4.84–4.78 (2H, br m, overlapped), 4.01–3.92 (4H, m, overlapped), 3.28 (1H, d,  $J = 4.0$  Hz), 3.22 (3H, s), 2.84 (1H, m), 2.64 (1H, m), 2.24 (1H, m), 1.82–1.73 (4H, m, overlapped), 1.47–1.41 (4H, br m, overlapped), 1.35–1.22 (75H, br m, overlapped), 0.98 (3H, d,  $J = 7.0$  Hz), 0.89–0.83 (9H, m, overlapped); <sup>13</sup>C NMR (125 MHz, CDCl<sub>3</sub>)  $\delta$  174.9, 173.4, 173.3, 170.4, 161.6, 159.0, 132.9, 114.7, 104.8, 99.8, 71.6, 68.2, 60.3, 49.6, 46.4, 37.9, 33.5, 32.0, 31.2, 29.8–29.2 (many signals overlapped), 26.1, 22.8, 19.7, 17.7, 16.4, 14.2; IR (KBr)  $\nu$  (cm<sup>-1</sup>) 3286, 2916, 2849, 1654, 1469, 1179, 1131, 719; HRMS (FAB, NBA matrix) Calcd. for C<sub>64</sub>H<sub>120</sub>N<sub>5</sub>O<sub>7</sub>: 1070.9188 ([M + Na]<sup>+</sup>), Found: 1070.9191.

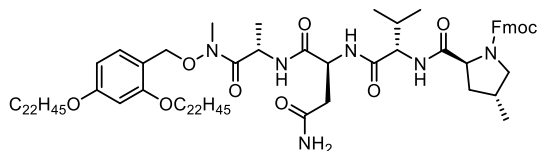

#### Fmoc-4-MePro-Val-Asn-Ala-(Me)N-O-TAGb (**S29**)

Following the general procedure described for condensation, Val-Asn-Ala-(Me)N-O-TAGb (**S28**) (1.28 g, 1.2 mmol) was converted to Fmoc-4-MePro-Val-Asn-Ala-(Me)N-O-TAGb (**S29**) (1.68 g, quant.) as a white powder.  $[\alpha]_D^{24.6} = -9.7$  (c 0.1, CHCl<sub>3</sub>); mp 160–161 °C; <sup>1</sup>H NMR (500 MHz, CDCl<sub>3</sub>, Signals were broad and complex due to the rotamers. Those derived from minor rotamers were not described here.)  $\delta$  7.76 (2H, br d,  $J = 6.5$  Hz), 7.63 (1H, br d,  $J = 7.0$  Hz), 7.59 (2H, br d,  $J = 7.5$  Hz), 7.49 (1H, br d,  $J = 7.0$  Hz), 7.40 (2H, br t,  $J = 7.5$  Hz), 7.32 (2H, td,  $J = 7.5, 1.0$  Hz), 7.23 (1H, br d,  $J = 8.0$  Hz), 6.43–6.42 (2H, br m, overlapped), 6.34 (1H, br s), 5.85 (1H, br s), 5.39 (1H, br s), 4.97–4.92 (2H, br m, overlapped), 4.81 (2H, br m, overlapped), 4.48–4.34 (4H, br m, overlapped), 4.25 (1H, br t,  $J = 6.5$  Hz), 4.01–3.92 (4H, br m, overlapped), 3.66 (1H, br t,  $J = 7.0$  Hz), 3.21 (3H, br s), 2.96 (1H, br t,  $J = 10.0$  Hz), 2.78 (1H, br m), 2.65 (1H, br m), 2.28–2.07 (3H, br m, overlapped), 1.80–1.73 (4H, br m), 1.65 (1H, br m), 1.47–1.41 (4H, br m, overlapped), 1.35–1.22 (75H, br m, overlapped), 1.06 (3H, br d,  $J = 6.0$  Hz), 0.93 (3H, d,  $J = 6.5$  Hz), 0.90–0.86 (9H, m, overlapped); <sup>13</sup>C NMR (125 MHz, CDCl<sub>3</sub>, Signals were broad and complex due to the rotamers.)  $\delta$  173.4, 173.2, 172.3, 171.2, 170.0, 161.6, 159.0, 156.3, 144.1, 143.8, 141.4, 133.0, 127.9, 127.5, 127.3, 125.2, 120.1, 114.8, 104.8, 99.8, 71.6, 68.3, 68.0, 61.3, 58.7, 54.0, 49.9, 47.3, 46.3, 37.3, 36.7, 33.5, 32.7, 32.1, 30.9, 29.8–29.3 (many signals overlapped), 26.2, 22.8, 19.5, 17.9, 17.8, 17.3, 14.3; IR (KBr)  $\nu$  (cm<sup>-1</sup>) 3286, 2917, 2849, 1642, 1468, 1418, 1178, 1129, 739, 719; HRMS (FAB, NBA + NaI matrix) Calcd. for C<sub>85</sub>H<sub>138</sub>N<sub>6</sub>O<sub>10</sub>Na: 1426.0372 ([M + Na]<sup>+</sup>), Found: 1426.0363.

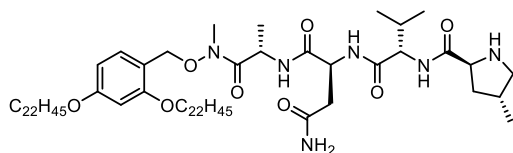

#### 4-MePro-Val-Asn-Ala-(Me)N-O-TAGb (**S30**)

Following the general procedure described for Fmoc deprotection, Fmoc-4-MePro-Val-Asn-Ala-(Me)N-O-TAGb (**S29**) (1.64 g, 1.2 mmol) was converted to 4-MePro-Val-Asn-Ala-(Me)N-O-TAGb (**S30**) (1.38 g, quant.) as a white powder.  $[\alpha]_D^{24.6} = -2.3$  (c 0.1, CHCl<sub>3</sub>); mp 93–95 °C; <sup>1</sup>H NMR (500 MHz, CDCl<sub>3</sub>)  $\delta$  8.31 (1H, br d,  $J = 8.5$  Hz), 7.78 (1H, br d,  $J = 7.5$  Hz), 7.58 (1H, br d,  $J = 7.0$  Hz), 7.23 (1H, br m), 6.54 (1H, br s), 6.43–6.42 (2H, br m, overlapped), 5.94 (1H, br s), 4.97–4.92 (2H, br m, overlapped), 4.83–4.75 (2H, m, overlapped), 4.28 (1H, dd,  $J = 9.5, 6.5$  Hz), 4.01–3.92 (4H, m, overlapped), 3.82 (1H, m), 3.21 (3H, s), 3.08 (1H, dd,  $J = 10.0, 6.5$  Hz), 2.80 (1H, m), 2.65–2.56 (2H, m, overlapped), 2.21 (1H, m), 2.13–2.04 (2H, m, overlapped), 1.82–1.68 (5H, m, overlapped), 1.46–1.41 (4H, br m, overlapped), 1.35–1.22 (75H, br m, overlapped), 0.99 (3H, d,  $J = 6.5$  Hz), 0.96 (3H, d,  $J = 6.5$  Hz), 0.91 (3H, d,  $J = 7.0$  Hz),

0.87 (6H, t,  $J = 7.0$  Hz);  $^{13}\text{C}$  NMR (125 MHz,  $\text{CDCl}_3$ )  $\delta$  176.2, 173.6, 173.3, 171.7, 170.2, 161.6, 159.0, 133.0, 114.8, 104.9, 99.8, 71.6, 68.3, 60.4, 58.1, 54.7, 50.0, 46.3, 39.0, 37.2, 33.5, 33.3, 32.1, 30.9, 29.8-29.3 (many signals overlapped), 26.19, 26.17, 22.8, 19.7, 17.9, 17.7, 17.6, 14.3; IR (KBr)  $\nu$  ( $\text{cm}^{-1}$ ) 3271, 2916, 2849, 1643, 1508, 1468, 1179, 1131, 719; HRMS (FAB, NBA matrix) Calcd. for  $\text{C}_{70}\text{H}_{128}\text{N}_6\text{O}_8$ : 1181.9872 ( $[\text{M} + \text{H}]^+$ ), Found: 1181.9851.

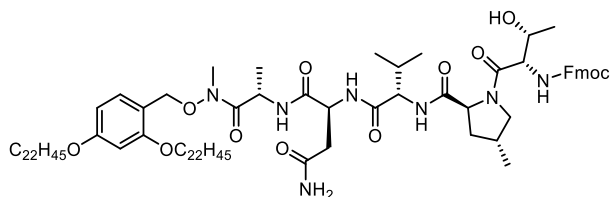

#### Fmoc-Thr-4-MePro-Val-Asn-Ala-(Me)N-O-TAGb (**S31**)

Following the general procedure described for condensation, 4-MePro-Val-Asn-Ala-(Me)N-O-TAGb (**S30**) (657 mg, 0.56 mmol) was converted to Fmoc-Thr-4-MePro-Val-Asn-Ala-(Me)N-O-TAGb (**S31**) (818 mg, 98%) as a white powder.  $[\alpha]_D^{24.6} = -11.9$  (c 0.1,  $\text{CHCl}_3$ ); mp 115–125 °C;  $^1\text{H}$  NMR (500 MHz,  $\text{CDCl}_3$ , Signals were broad and complex due to the rotamers. Those derived from minor rotamers were not described here.)  $\delta$  7.78 (1H, br d,  $J = 8.0$  Hz), 7.74 (2H, br d,  $J = 7.5$  Hz), 7.59 (2H, br d,  $J = 7.5$  Hz), 7.38 (2H, br t,  $J = 7.5$  Hz), 7.30 (2H, br td,  $J = 7.5$ , 2.0 Hz), 7.30 (1H, br d,  $J = 8.5$  Hz), 7.15 (1H, br d,  $J = 9.0$  Hz), 6.95 (1H, br s), 6.44-6.40 (2H, br m, overlapped), 6.36 (1H, br s), 6.23 (1H, br d,  $J = 8.0$  Hz), 5.05-4.96 (3H, br m, overlapped), 4.80 (1H, br d,  $J = 10.0$  Hz), 4.71 (1H, br dd,  $J = 9.5$ , 4.0 Hz), 4.66-4.49 (3H, br m, overlapped), 4.45 (1H, dd,  $J = 11.0$ , 7.5 Hz), 4.35 (1H, dd,  $J = 10.5$ , 7.0 Hz), 4.30 (1H, br m), 4.20 (1H, t,  $J = 7.0$  Hz), 4.05 (1H, br t,  $J = 8.0$  Hz), 4.01-3.90 (4H, br m, overlapped), 3.31 (1H, br t,  $J = 9.5$  Hz), 3.21 (3H, s), 2.79 (1H, br m), 2.70 (1H, br m), 2.47 (1H, br m), 2.25-2.17 (2H, br m, overlapped), 1.93 (1H, br m), 1.82-1.73 (4H, br m, overlapped), 1.47-1.41 (4H, br m, overlapped), 1.35-1.22 (78H, br m, overlapped), 1.09 (3H, d,  $J = 6.5$  Hz), 0.95 (3H, d,  $J = 7.0$  Hz), 0.88 (9H, t,  $J = 7.0$  Hz);  $^{13}\text{C}$  NMR (125 MHz,  $\text{CDCl}_3$ , Signals were broad and complex due to the rotamers.)  $\delta$  173.8, 173.1, 172.2, 171.6, 171.2, 169.8, 161.6, 159.0, 156.4, 143.9, 143.8, 141.4, 133.0, 127.9, 127.2, 125.23, 125.19, 120.10, 120.08, 114.8, 104.8, 99.8, 71.6, 68.3, 68.1, 67.1, 61.6, 58.0, 56.8, 54.6, 50.5, 47.3, 46.1, 37.8, 37.2, 33.5, 32.9, 32.1, 31.2, 29.8-29.3 (many signals overlapped), 26.2, 22.8, 19.6, 18.6, 18.1, 18.0, 17.4, 14.3; IR (KBr)  $\nu$  ( $\text{cm}^{-1}$ ) 3302, 2917, 2849, 1644, 1508, 1467, 1264, 1179, 740, 721; HRMS (FAB, NBA + NaI matrix) Calcd. for  $\text{C}_{89}\text{H}_{145}\text{N}_7\text{O}_{12}\text{Na}$ : 1527.0849 ( $[\text{M} + \text{Na}]^+$ ), Found: 1527.0854.

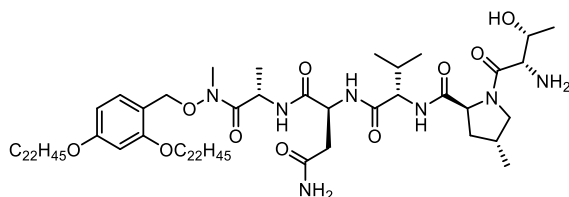

#### Thr-4-MePro-Val-Asn-Ala-(Me)N-O-TAGb (**S32**)

Following the general procedure described for Fmoc deprotection, Fmoc-Thr-4-MePro-Val-Asn-Ala-(Me)N-O-TAGb (**S31**) (768 mg, 0.51 mmol) was converted to Thr-4-MePro-Val-Asn-Ala-(Me)N-O-TAGb (**S32**) (664 mg, quant.) as a white powder.  $[\alpha]_D^{24.6} = -9.7$  (c 0.1,  $\text{CHCl}_3$ ); mp 70–78 °C;  $^1\text{H}$  NMR (500 MHz,  $\text{CDCl}_3$ , Signals were broad and complex due to the rotamers. Those derived from minor rotamers were not described here.)  $\delta$  7.97 (1H, br d,  $J = 8.0$  Hz), 7.35 (1H, br d,  $J = 9.5$  Hz), 7.25 (1H, br m), 7.16 (1H, br s), 6.96 (1H, br s), 6.43-6.41 (2H, br m, overlapped), 5.04-4.91 (3H, br m, overlapped), 4.80 (1H, br m), 4.69-4.60 (2H, br m, overlapped), 4.15-4.09 (2H, br m, overlapped), 4.01-3.92 (4H, br m, overlapped), 3.84 (1H, br d,  $J = 5.0$  Hz), 3.21 (3H, s), 3.15 (1H, br t,  $J = 9.5$  Hz), 2.75 (1H, br m), 2.65 (1H, br m), 2.47 (1H, br m), 2.24-2.08 (3H, br m, overlapped), 1.87-1.73 (5H, br m, overlapped), 1.47-1.40 (4H, br m, overlapped), 1.35-1.22 (78H, br m, overlapped), 1.09 (3H, d,  $J = 6.5$  Hz), 0.95 (3H, d,  $J = 6.0$  Hz), 0.87 (9H, t,  $J = 7.5$  Hz);  $^{13}\text{C}$  NMR (125 MHz,  $\text{CDCl}_3$ )  $\delta$  174.0, 173.3, 173.2, 172.4, 171.5, 169.9, 161.6, 159.0, 133.0, 114.8, 104.9, 99.8, 71.6, 70.2, 68.3, 61.7, 57.6, 56.3, 54.5, 50.5, 46.0, 37.6, 37.3, 33.5, 32.8, 32.3, 32.1, 29.8-29.3 (many signals overlapped), 26.2, 22.8, 19.5, 18.2, 17.9, 17.4, 14.3; IR (KBr)  $\nu$  ( $\text{cm}^{-1}$ ) 3297, 2917, 2849, 1645, 1508, 1468, 1178, 1131, 719; HRMS (FAB, NBA matrix) Calcd. for  $\text{C}_{74}\text{H}_{136}\text{N}_7\text{O}_{10}$ : 1283.0349 ( $[\text{M} + \text{H}]^+$ ), Found: 1283.0349.

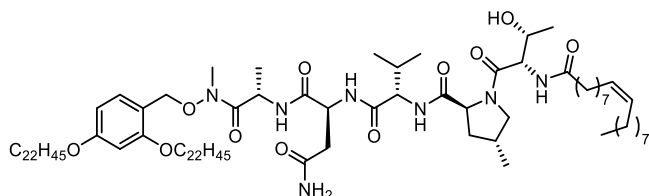

#### Oleic acid-Thr-4-MePro-Val-Asn-Ala-(Me)N-O-TAGb (**12**)

Following the general procedure described for condensation using oleic acid instead of Fmoc protected amino acid, Thr-4-MePro-Val-Asn-Ala-(Me)N-O-TAGb (**S32**) (610 mg, 0.48 mmol) was converted to oleic acid-Thr-4-MePro-Val-Asn-Ala-(Me)N-O-TAGb (**12**) (707 mg, 96%) as a white powder.  $[\alpha]_D^{24.6} = -8.5$  (c 0.1,  $\text{CHCl}_3$ ); mp 155–163 °C;  $^1\text{H}$  NMR (500 MHz,  $\text{CDCl}_3$ )  $\delta$  7.84 (1H, br d,  $J = 9.0$  Hz), 7.28 (1H, br d,  $J = 7.5$  Hz), 7.24 (1H, br d,  $J = 8.5$  Hz), 7.16 (1H, br d,  $J = 9.0$  Hz), 7.11 (1H, br s), 6.76 (1H, br d,  $J = 8.0$  Hz), 6.58 (1H, br s), 6.44-6.42 (2H, br m, overlapped), 5.36-5.29 (2H, m, overlapped), 5.01-4.92 (4H, br m, overlapped), 4.80 (1H, br d,  $J = 9.5$  Hz), 4.61-4.58 (2H, br m, overlapped), 4.29 (1H, br m), 4.06 (1H, br m), 4.02-3.92 (4H, br m, overlapped), 3.35 (1H, br t,  $J = 9.5$  Hz), 3.21 (3H, s), 2.81-2.76 (1H, br m), 2.70-2.66 (1H, br m), 2.46 (1H, br m), 2.25-2.15 (6H, br m, overlapped), 1.99 (3H, br m), 1.89 (1H, br m), 1.82-1.73 (4H, br m), 1.62 (2H, br m), 1.44 (4H, br m), 1.35-1.22 (98H, br m, overlapped), 1.09 (3H, d,  $J = 6.5$  Hz), 0.94 (3H, d,  $J = 6.5$  Hz), 0.88-0.86 (12H, m, overlapped);  $^{13}\text{C}$  NMR (125 MHz,  $\text{CDCl}_3$ )  $\delta$  173.7, 173.4, 173.2, 172.2, 171.6, 171.3, 169.8, 161.7, 159.0, 133.0, 130.1, 129.9, 114.7, 104.9, 99.8, 71.7, 68.3, 67.9, 61.6, 57.8, 54.6, 54.5, 50.3, 46.1, 37.8, 37.2, 36.6, 33.6, 32.9, 32.1, 31.6, 29.9-29.3 (many signals overlapped), 27.3, 26.2, 25.7, 22.8, 19.5, 18.8, 18.0, 17.9, 17.3, 14.3; IR (KBr)  $\nu$  ( $\text{cm}^{-1}$ ) 3284,



2915, 2849, 1645, 1536, 1468, 1180, 1130, 719; HRMS (FAB, NBA + NaI matrix) Calcd. for  $C_{92}H_{167}N_7O_{11}Na$ : 1569.2621 ( $[M + Na]^+$ ), Found: 1569.2625.

### Selective deprotection of TAG benzyl group under acid conditions and reduction to the aldehydes Scheme 3c.

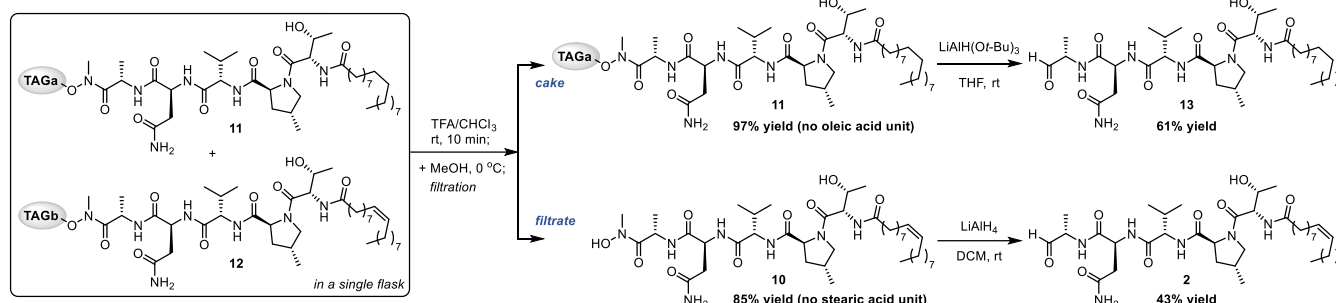

**11** (55.1 mg, 0.032 mmol, 1.0 eq) and **12** (50.0 mg, 0.032 mmol, 1.0 eq) was dissolved into 30% TFA/CHCl<sub>3</sub> (3.2 mL, 0.01 M for each substrate) at room temperature, and the solution was stirred for 10 min. The reaction mixture was subsequently cooled to 0 °C and MeOH (19 mL, 6-fold excess of TFA/CHCl<sub>3</sub>) was added. The resulting heterogeneous solution was stirred for a further 30 min at 0 °C. The precipitate was filtered and washed with additional MeOH to afford the crude cake **11**. On the other hand, the filtrate was concentrated in vacuo to afford the crude **10**. The crude products were purified by PLC on silica gel (CHCl<sub>3</sub>/MeOH = 5/1 as eluent) to give **11** (53.5 mg, 97%) as a white powder and hydroxamic acid **10** (22.2 mg, 85%) as a white powder respectively.

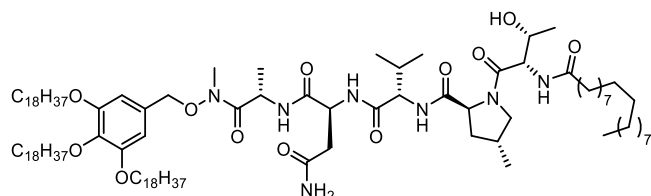

#### Stearic acid-Thr-4-MePro-Val-Asn-Ala-(Me)N-O-TAGa (**11**)

Following the general procedure described for condensation using stearic acid instead of Fmoc protected amino acid, Thr-4-MePro-Val-Asn-Ala-(Me)N-O-TAGa (**8**) (0.300 g, 0.21 mmol) was converted to stearic acid-Thr-4-MePro-Val-Asn-Ala-(Me)N-O-TAGa (**11**) (0.356 g, quant.) as a white powder.  $[\alpha]_D^{24.6} = -15.5$  (c 0.1, CHCl<sub>3</sub>); mp 153–154 °C; <sup>1</sup>H NMR (500 MHz, CDCl<sub>3</sub>)  $\delta$  7.80 (1H, br d,  $J = 8.5$  Hz), 7.33 (1H, br d,  $J = 7.5$  Hz), 7.11–7.08 (2H, br m, overlapped), 6.81 (1H, br d,  $J = 8.5$  Hz), 6.57 (2H, s), 6.39 (1H, br s), 4.98 (1H, dd,  $J = 8.5, 4.0$  Hz), 4.96–4.90 (2H, m, overlapped), 4.85 (1H, br d,  $J = 10.0$  Hz), 4.79 (1H, br d,  $J = 10.5$  Hz), 4.59 (1H, dd,  $J = 9.0, 4.0$  Hz), 4.55 (1H, dd,  $J = 9.0, 6.5$  Hz), 4.49 (1H, br s), 4.29 (1H, br m), 4.03 (1H, br dd,  $J = 9.5, 7.5$  Hz), 3.98–3.92 (6H, m, overlapped), 3.36 (1H, t,  $J = 9.5$  Hz), 3.18 (3H, s), 2.80 (1H, m), 2.70 (1H, m), 2.46 (1H, m), 2.25–2.15 (4H, m, overlapped), 1.90 (1H, m), 1.82–1.70 (6H, m, overlapped), 1.65–1.56 (2H, m), 1.49–1.43 (6H, br m, overlapped), 1.36–1.22 (89H, br m, overlapped), 1.09 (3H, t,  $J = 7.0$  Hz), 0.94 (3H, t,  $J = 6.5$  Hz), 0.89–0.86 (15H, m, overlapped); <sup>13</sup>C NMR (125 MHz, CDCl<sub>3</sub>)  $\delta$  173.8, 173.5, 173.4, 172.2, 171.7, 171.5, 170.0, 153.5, 138.8, 129.4, 107.7, 73.6, 69.3, 67.8, 61.5, 58.0, 54.7, 54.6, 50.6, 46.2, 37.8, 37.1, 36.7, 34.1, 33.0, 32.1, 31.3, 30.5, 29.9–29.5 (many signals overlapped), 26.3, 25.8, 22.8, 19.5, 18.9, 17.9, 17.8, 17.3, 14.3; IR (KBr)  $\nu$  (cm<sup>-1</sup>) 3281, 2916, 2849, 1638, 1543, 1468, 1439, 1239, 1121, 719; HRMS (FAB, NBA + NaI matrix) Calcd. for  $C_{102}H_{189}N_7O_{12}Na$ : 1727.4292 ( $[M + Na]^+$ ), Found: 1727.4307.

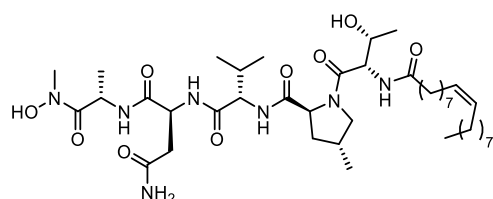

#### Oleic acid-Thr-4-MePro-Val-Asn-Ala-(Me)N-OH (**10**)

**12** (350 mg, 0.23 mmol) was dissolved into 30% trifluoroacetic acid (TFA)/CHCl<sub>3</sub> (11 mL, 0.02 M for substrate) at room temperature, and the solution was stirred for 20 min. The reaction mixture was subsequently cooled to 0 °C and MeOH (66 mL, 6-fold excess of TFA/CHCl<sub>3</sub>) was added, and the resulting heterogeneous solution was stirred for a further 30 min at 0 °C. The precipitate was filtered and washed with additional MeOH, and the filtrate was concentrated in vacuo. The residue was purified by flash column chromatography on silica gel (CHCl<sub>3</sub>/MeOH = 50/1 to 10/1 as eluent) to afford hydroxamic acid **10** (160 mg, 88%) as a white powder.  $[\alpha]_D^{24.6} = -32.1$  (c 0.1, DMSO); mp 193–196 °C; <sup>1</sup>H NMR (500 MHz, DMSO-*d*<sub>6</sub>)  $\delta$  10.05 (1H, s), 8.15 (1H, d,  $J = 8.0$  Hz), 7.86 (1H, d,  $J = 7.5$  Hz), 7.82 (1H, d,  $J = 8.5$  Hz), 7.59 (1H, br d,  $J = 7.5$  Hz), 7.33 (1H, br s), 6.89 (1H, br s), 5.35–5.29 (2H, m, overlapped), 4.76 (1H, br m), 4.65 (1H, d,  $J = 6.0$  Hz), 4.55–4.48 (2H, m, overlapped), 4.42 (1H, t,  $J = 7.5$  Hz), 4.12 (1H, dd,  $J = 8.0, 6.0$  Hz), 3.83–3.76 (2H, m, overlapped), 3.25 (1H, t,  $J = 9.0$  Hz), 3.08 (3H, s), 2.56 (1H, dd,  $J = 11.0, 6.5$  Hz), 2.39–2.30 (2H, m, overlapped), 2.17–2.06 (2H, m, overlapped), 2.01–1.91 (6H, m, overlapped), 1.64 (1H, m), 1.45 (2H, br m), 1.30–1.20 (20H, br m, overlapped), 1.16 (3H, d,  $J = 7.0$  Hz), 1.08 (3H, d,  $J = 6.0$  Hz), 0.97 (3H, d,  $J = 6.5$  Hz), 0.86–0.80 (9H, m, overlapped); <sup>13</sup>C NMR (125 MHz, DMSO-*d*<sub>6</sub>)  $\delta$  172.2, 171.7, 171.5, 171.4, 170.8, 170.1, 169.4, 129.7, 67.0, 59.2, 57.5, 56.1, 54.0, 49.3, 45.0, 36.7, 36.6, 35.9, 34.9, 32.0, 31.3, 30.7, 29.2–28.6 (many signals overlapped), 26.64, 26.60, 25.3, 22.1, 19.3, 19.2, 17.9, 17.3, 17.2, 14.0; IR (KBr)  $\nu$  (cm<sup>-1</sup>) 3283, 2924, 2854, 1636, 1540, 1435, 1199; HRMS (ESI<sup>+</sup>) Calcd. for  $C_{41}H_{73}N_7O_9Na$ : 830.5367 ( $[M + Na]^+$ ), Found: 830.5358.

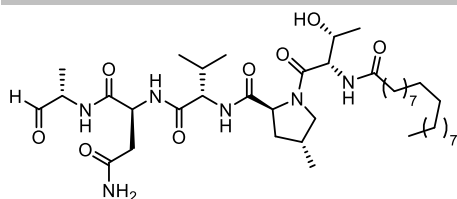

Stearic acid-Thr-4-MePro-Val-Asn-Ala-H (**13**)

To a solution of **11** (50 mg, 0.029 mmol, 1.0 eq) in dehydrated THF (2.9 mL, 0.01 M) was added dropwise 1.0 M LiAlH(*t*-BuO)<sub>3</sub> in dehydrated THF (293 mL, 10 eq) at room temperature. After stirring for 1 h at room temperature, the reaction mixture was then treated with aqueous 1 N HCl (1.5 mL) at 0 °C to quench the excess LiAlH(*t*-BuO)<sub>3</sub>. After stirring for 10 min at room temperature, MeOH (15 mL) was added. The resulting heterogeneous solution was stirred for a further 30 min at room temperature, and the precipitate was filtered and washed with additional MeOH. The filtrate was roughly concentrated in vacuo, poured into a separatory funnel containing aqueous 1 N HCl (10 mL), and extracted with CHCl<sub>3</sub> (3 × 10 mL). The combined organic extracts were dried with Na<sub>2</sub>SO<sub>4</sub>, filtered, and concentrated in vacuo. The residue was purified by PLC on silica gel (CHCl<sub>3</sub>/MeOH = 5/1 as eluent) to afford aldehyde **13** (13.7 mg, 61%) as a white powder. [ $\alpha$ ]<sub>D</sub><sup>24.6</sup> = −35.6 (c 0.1, CHCl<sub>3</sub>); mp 176–177 °C; <sup>1</sup>H NMR (500 MHz, DMSO-*d*<sub>6</sub>)  $\delta$  9.34 (1H, s), 8.13 (1H, d, *J* = 6.5 Hz), 8.10 (1H, d, *J* = 8.5 Hz), 7.87 (2H, app d, *J* = 8.5 Hz, overlapped), 7.37 (1H, br s), 6.92 (1H, br s), 4.67 (1H, br m), 4.55–4.47 (2H, m, overlapped), 4.41 (1H, br m), 4.03 (1H, m), 3.83–3.77 (2H, m, overlapped), 3.27 (1H, br m), 2.52 (1H, m, overlapped with solvent residual signals), 2.34 (1H, m), 2.12 (2H, m), 2.01–1.92 (2H, m, overlapped), 1.65 (1H, m), 1.45 (2H, br m), 1.29–1.18 (30H, br m, overlapped), 1.14 (3H, d, *J* = 7.5 Hz), 1.08 (3H, d, *J* = 6.0 Hz), 0.97 (3H, d, *J* = 6.5 Hz), 0.86–0.82 (9H, m, overlapped); <sup>13</sup>C NMR (125 MHz, DMSO-*d*<sub>6</sub>)  $\delta$  201.3, 172.2, 171.8, 171.4, 171.3, 170.6, 169.4, 66.9, 59.2, 56.2, 53.9, 49.5, 36.7, 36.5, 34.8, 32.0, 31.3, 30.3, 29.0–28.7 (many signals overlapped), 25.2, 22.1, 19.3, 19.1, 18.0, 17.2, 14.0, 13.5; IR (KBr)  $\nu$  (cm<sup>−1</sup>) 3286, 2920, 2851, 1639, 1541, 1419, 1239, 1066; HRMS (ESI<sup>+</sup>) Calcd. for C<sub>40</sub>H<sub>72</sub>N<sub>6</sub>O<sub>8</sub>Na: 787.5309 ([M + Na]<sup>+</sup>), Found: 787.5315.

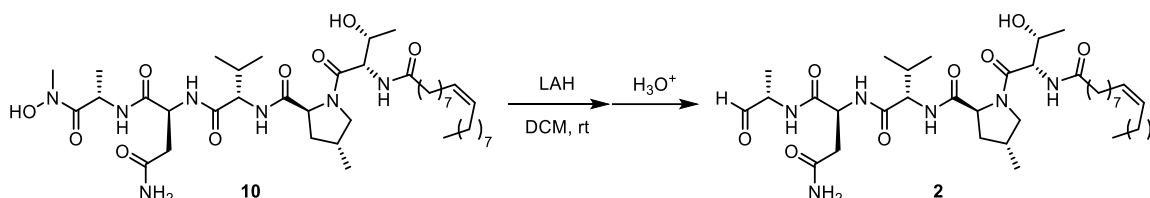

To a solution of **10** (20.0 mg, 0.025 mmol, 1.0 eq) in dehydrated DCM (2.5 mL, 0.01 M) was added dropwise 0.2 M LiAlH<sub>4</sub> in dehydrated THF (pre-prepared, 0.272 mL, 2.2 eq) at 0 °C. After stirring for 40 min at room temperature, the reaction mixture was then treated with aqueous 1 N HCl (1.2 mL) at 0 °C to quench the excess LiAlH<sub>4</sub>. After stirring for 10 min at room temperature, MeOH (13 mL) was added. The resulting heterogeneous solution was stirred for a further 30 min at room temperature, and the precipitate was filtered and washed with additional MeOH. The filtrate was roughly concentrated in vacuo, poured into a separatory funnel containing aqueous 1 N HCl (10 mL), and extracted with CHCl<sub>3</sub> (3 × 10 mL). The combined organic extracts were dried with Na<sub>2</sub>SO<sub>4</sub>, filtered, and concentrated in vacuo. The residue was purified by PLC on silica gel (CHCl<sub>3</sub>/MeOH = 5/1 as eluent) to afford aldehyde **2** (8.1 mg, 43%) as a white powder.

## References

- [1] a) J. R. D. Valle, M. Goodman, *J. Org. Chem.* **2003**, 68, 3923–3931; b) M. D. Shoulders, J. A. Hodges, R. T. Raines, *J. Am. Chem. Soc.* **2006**, 128, 8112–8113.
- [2] Y. Hayashi, W. Fukasawa, T. Hirose, M. Iwatsuki, R. Hokari, A. Ishiyama, M. Kanaida, K. Nonaka, A. Také, K. Otoguro, S. Ōmura, K. Shiomi, T. Sunazuka, *Org. Lett.* **2019**, 21, 2180–2184.
- [3] a) P. Marfey, *Carisberg Res. Commun.* **1984**, 49, 591–596; b) K. Fujii, Y. Ikai, T. Mayumi, H. Oka, M. Suzuki, K. Harada, *Anal. Chem.* **1997**, 69, 3346–3352.
- [4] a) H. Tamiaki, T. Obata, Y. Azefu, K. Toma, *Bull. Chem. Soc. Jpn.* **2001**, 74, 733–738; b) T. Hirose, T. Kasai, T. Akimoto, A. Endo, A. Sugawara, K. Nagasawa, K. Shiomi, S. Ōmura, T. Sunazuka, *Tetrahedron* **2011**, 67, 6633–6643.
- [5] Tana, G.; Kitada, S.; Fujita, S.; Okada, Y.; Kim, S.; Chiba, K. *Chem. Commun.* **2010**, 46, 8219–8221.
- [6] Brown, H. C.; McFarlin, R. F. *J. Am. Chem. Soc.* **1958**, 80, 5372–5376.

## NMR spectra of the products

$^1\text{H}$  NMR of HO-TAGa (**S3**) (500 MHz,  $\text{CDCl}_3$ )

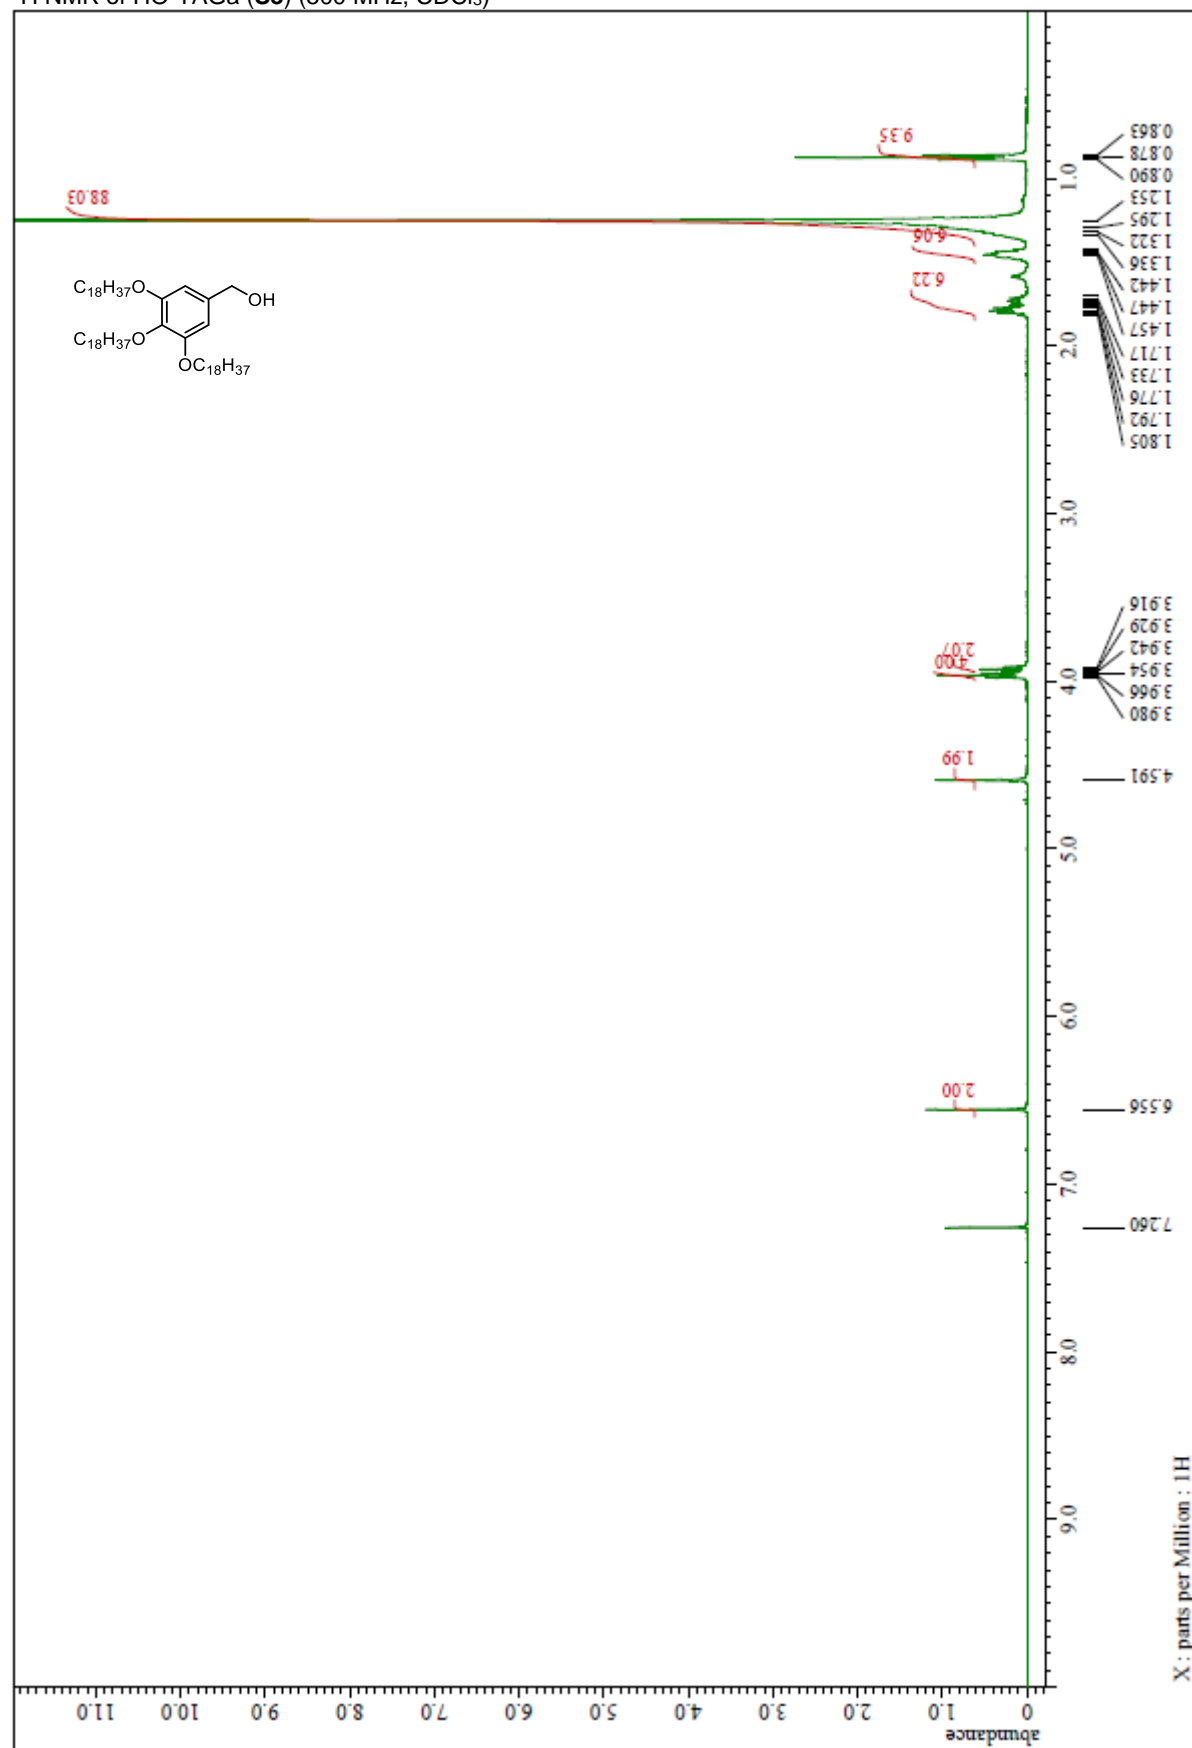

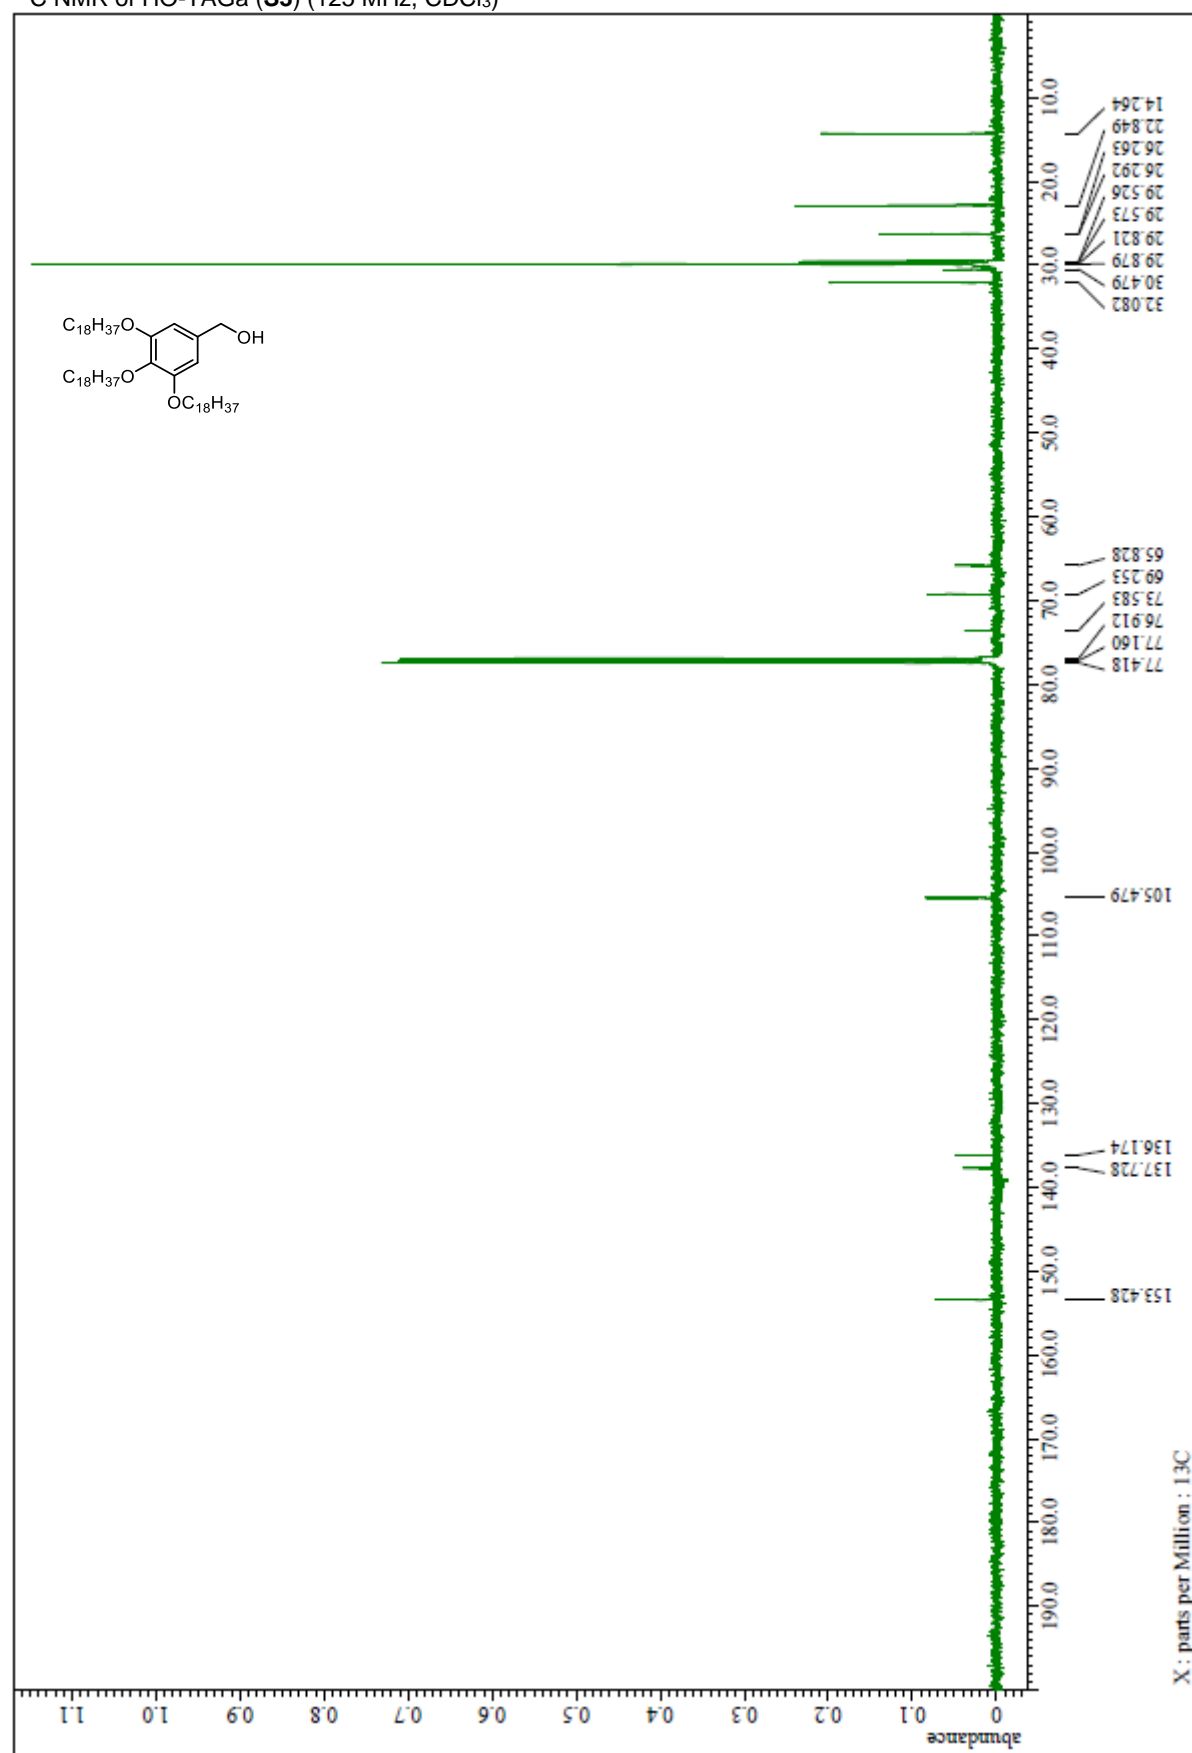

$^1\text{H}$  NMR of Phthalimide-O-TAGa (**S4**) (500 MHz,  $\text{CDCl}_3$ )

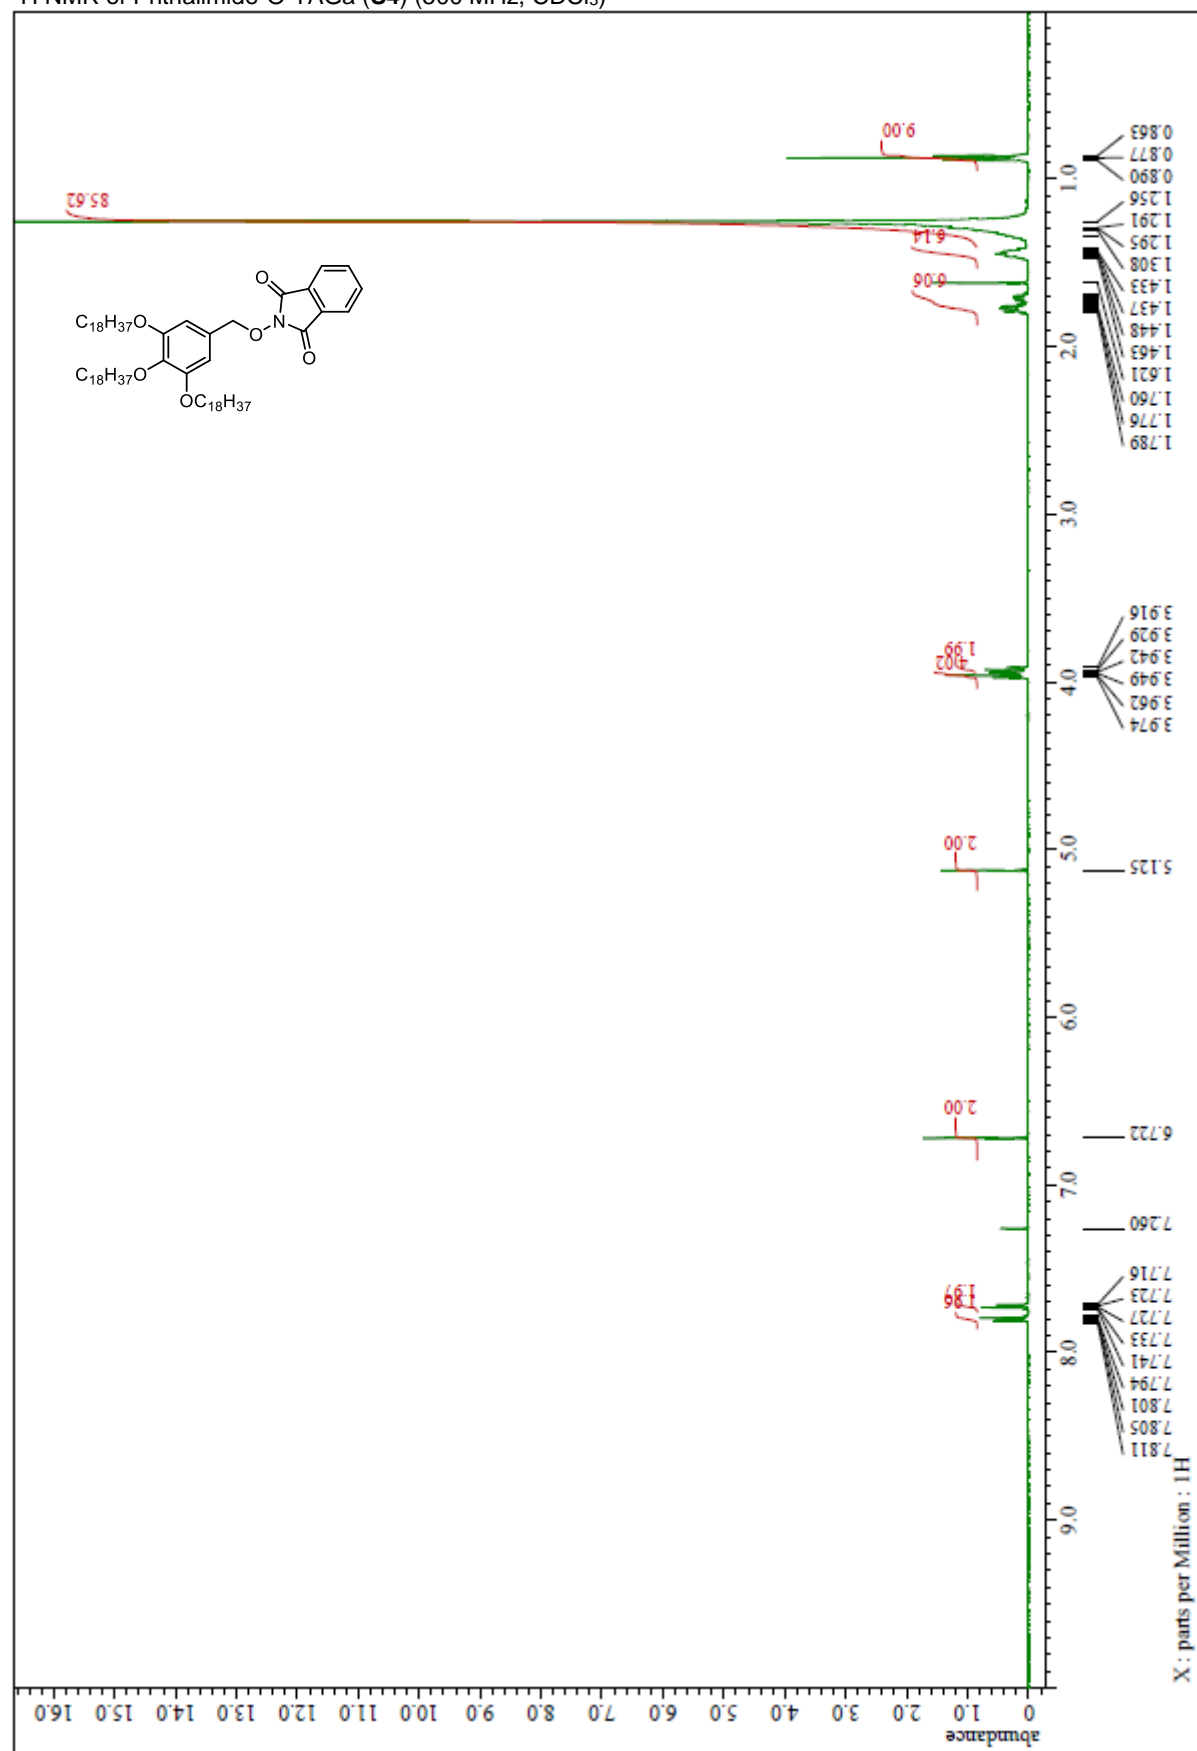

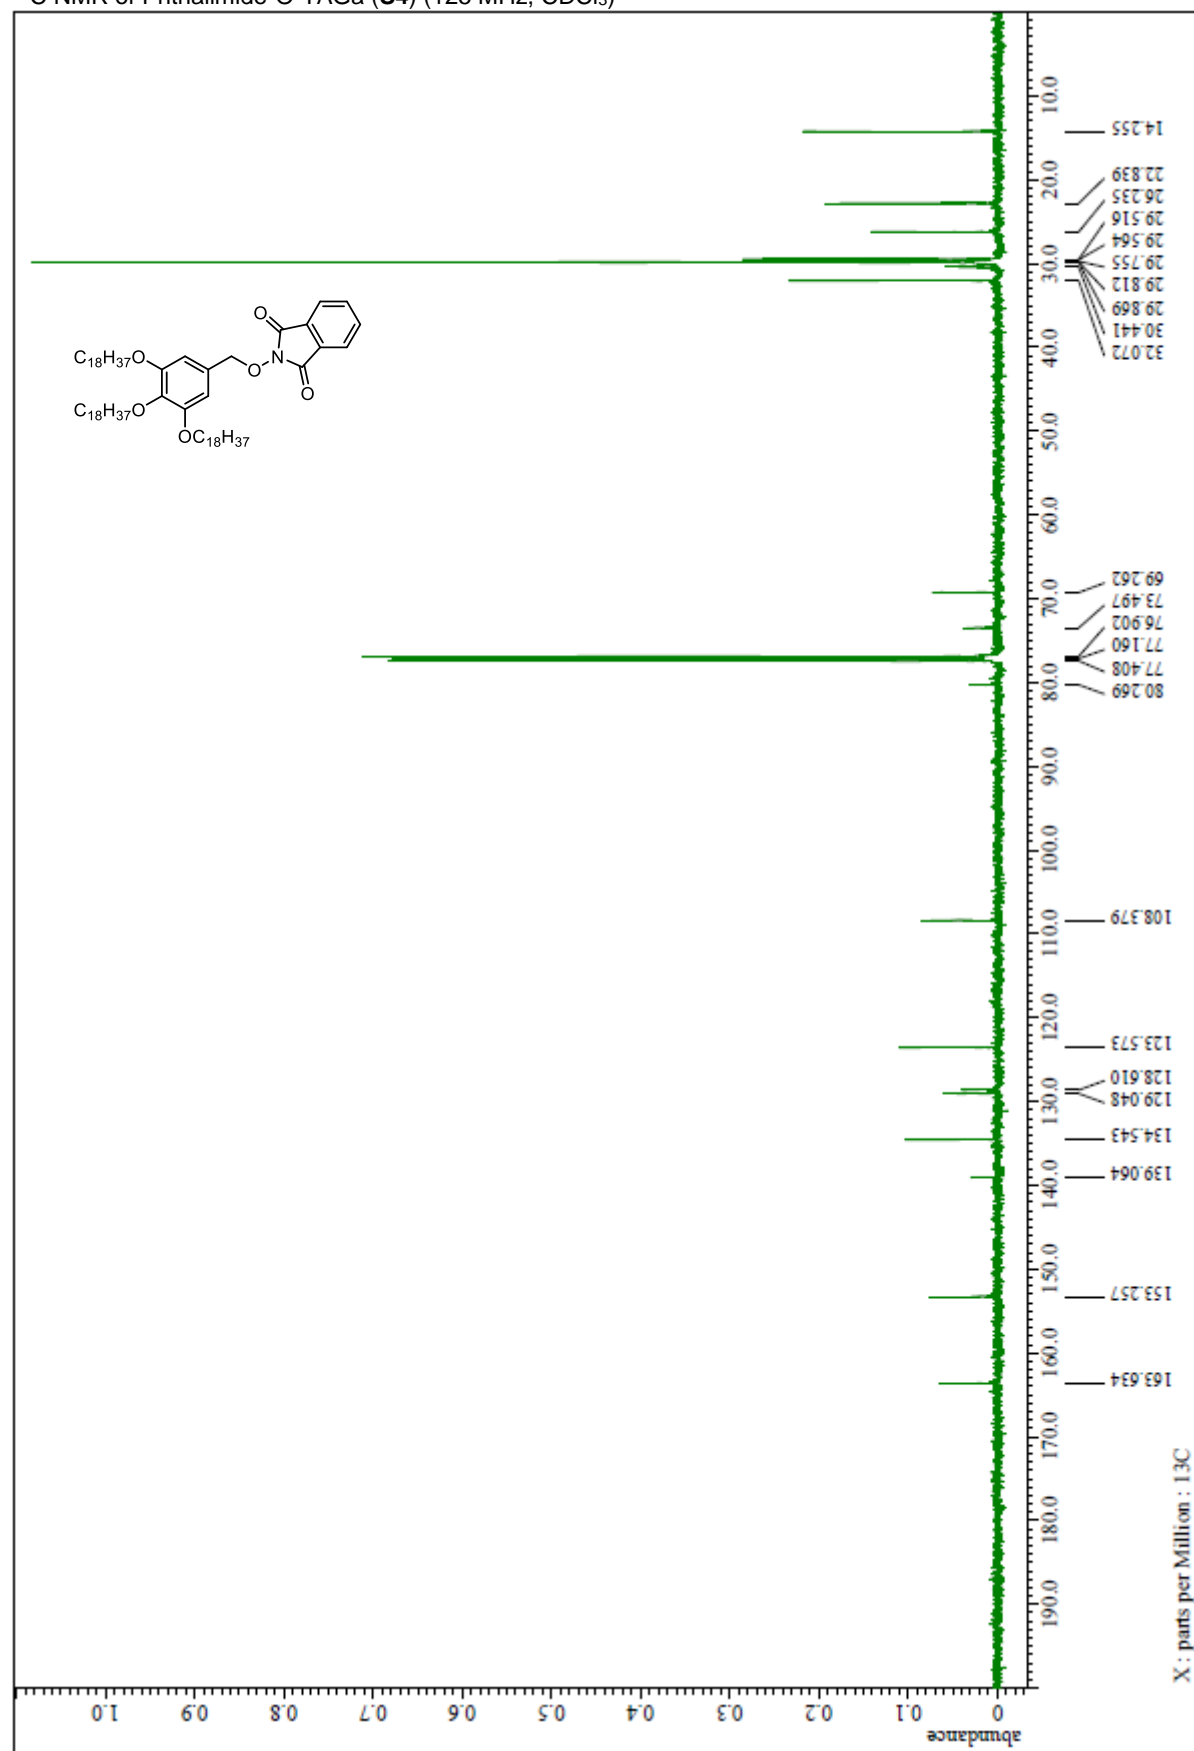

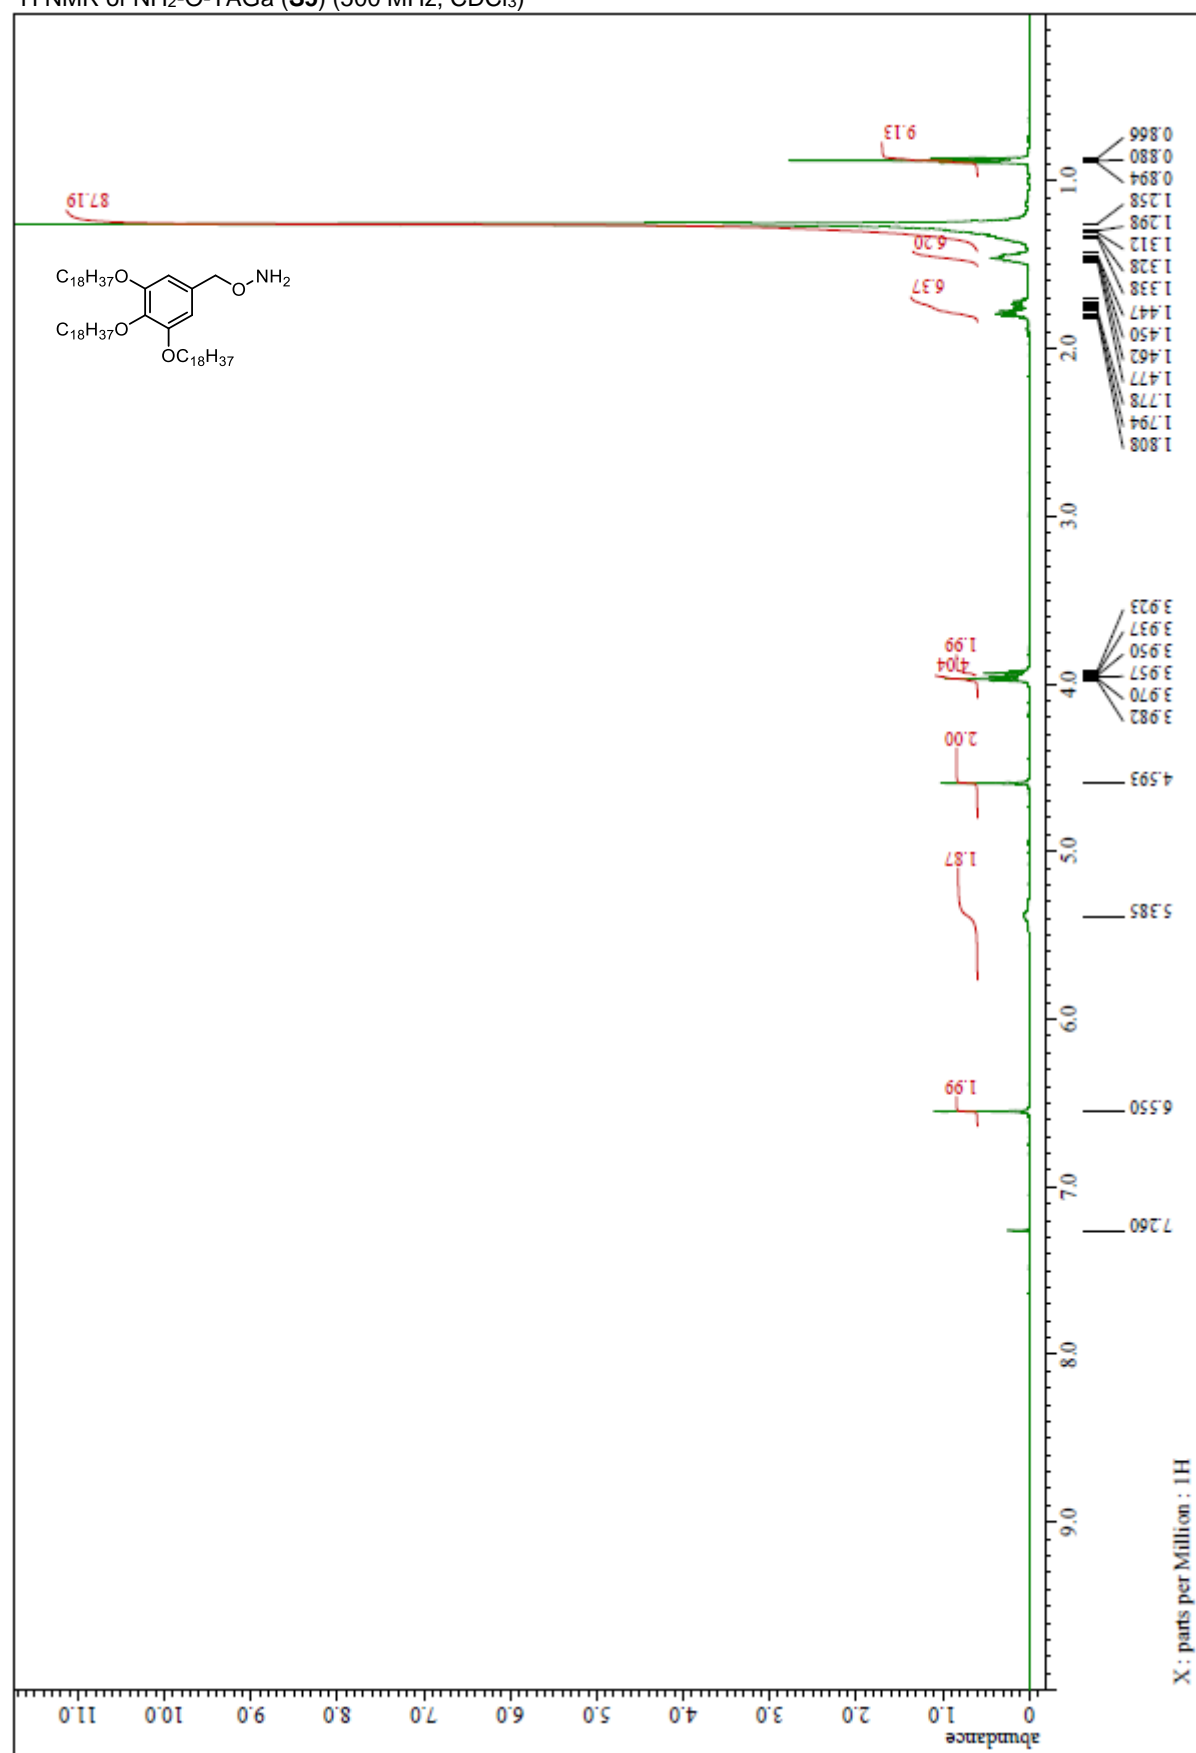

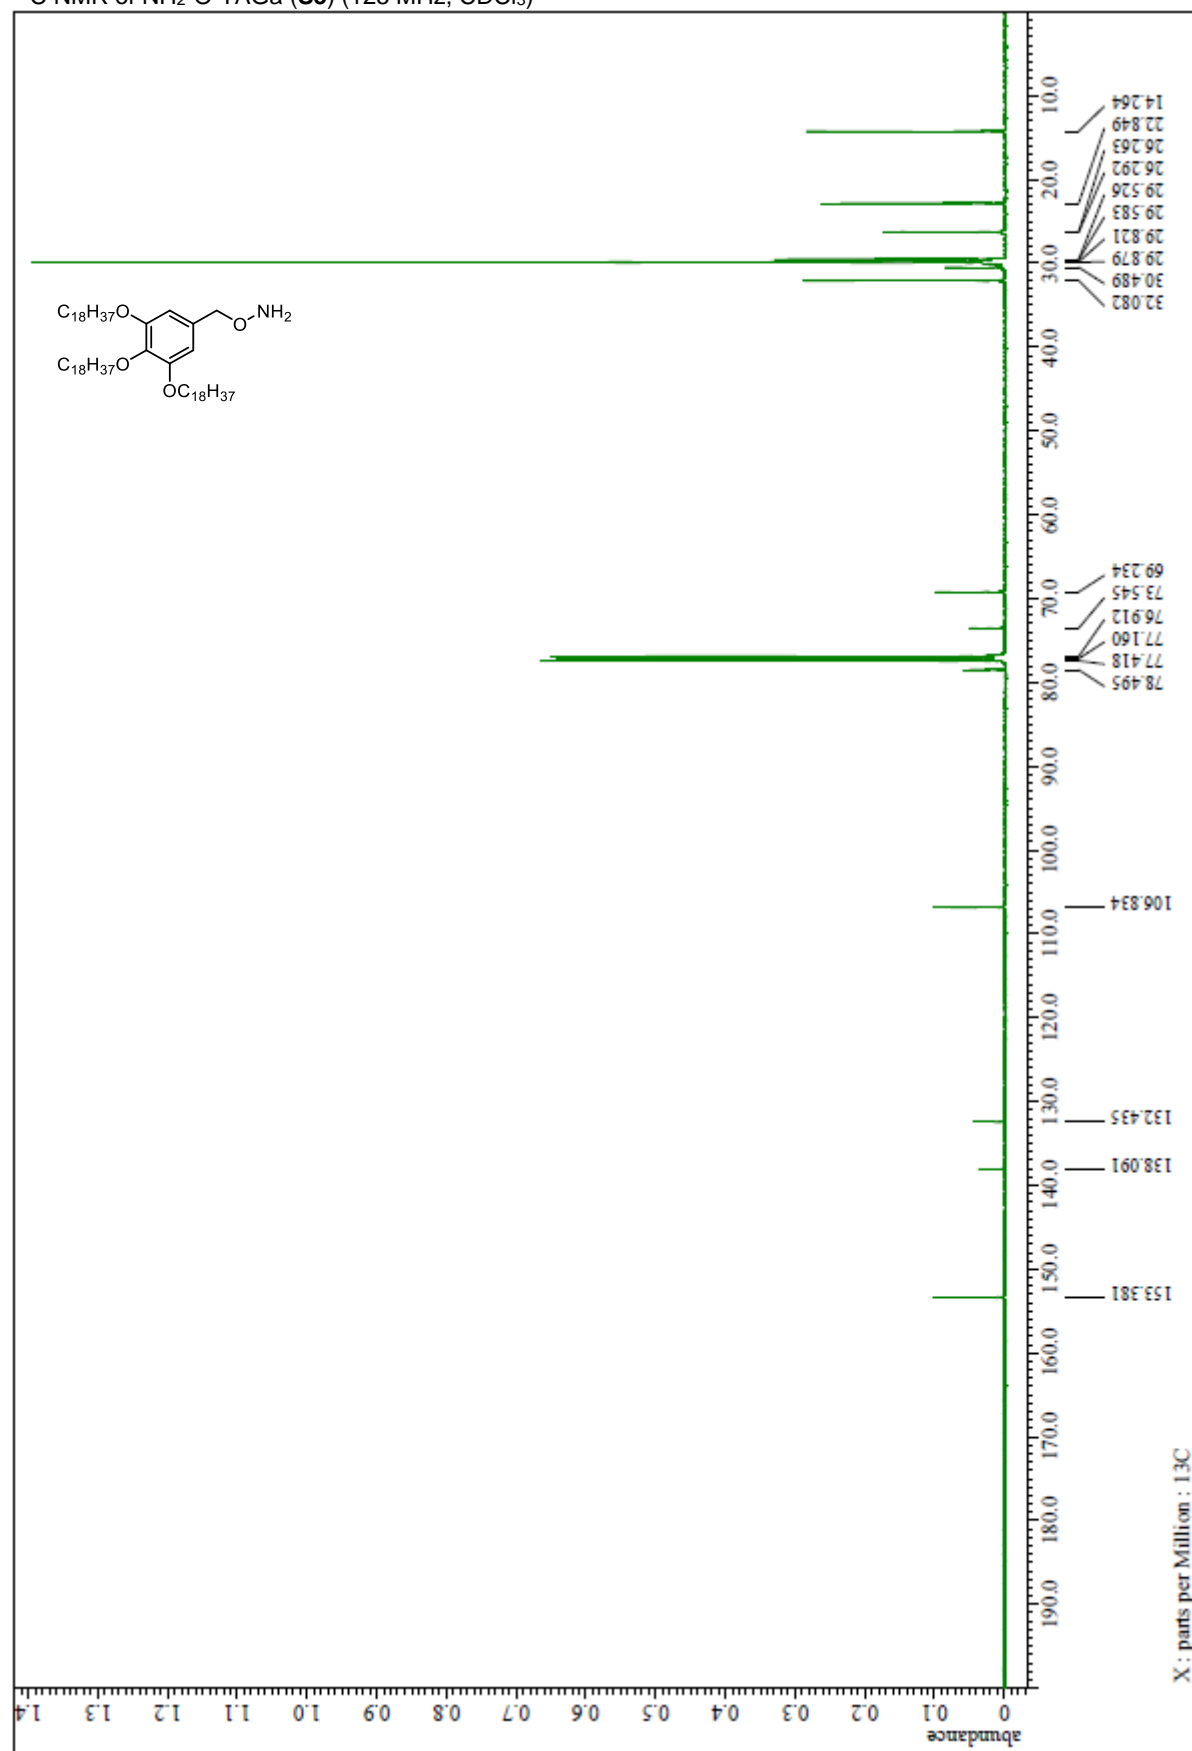



$^1\text{H}$  NMR of  $\text{CH}_2=\text{N}-\text{O}-\text{TAGa}$  (**S6**) (500 MHz,  $\text{CDCl}_3$ )

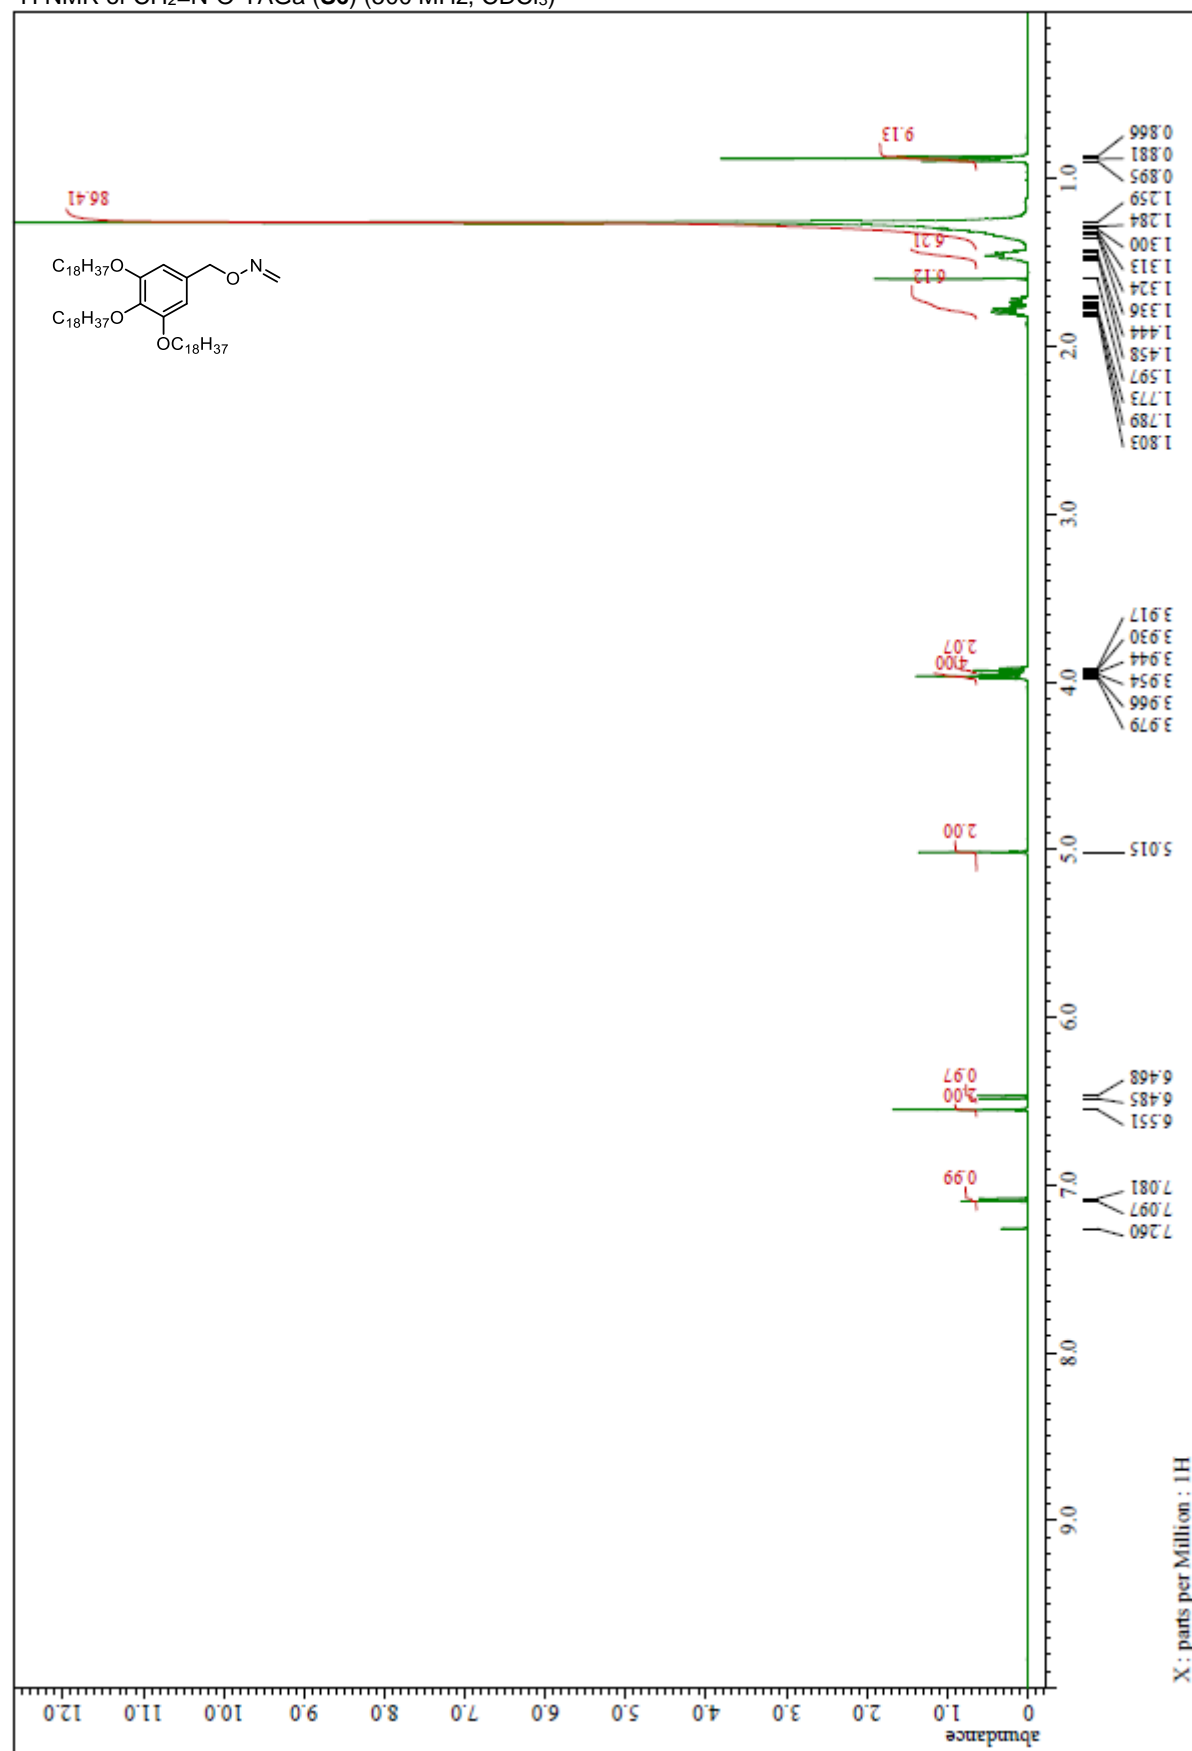

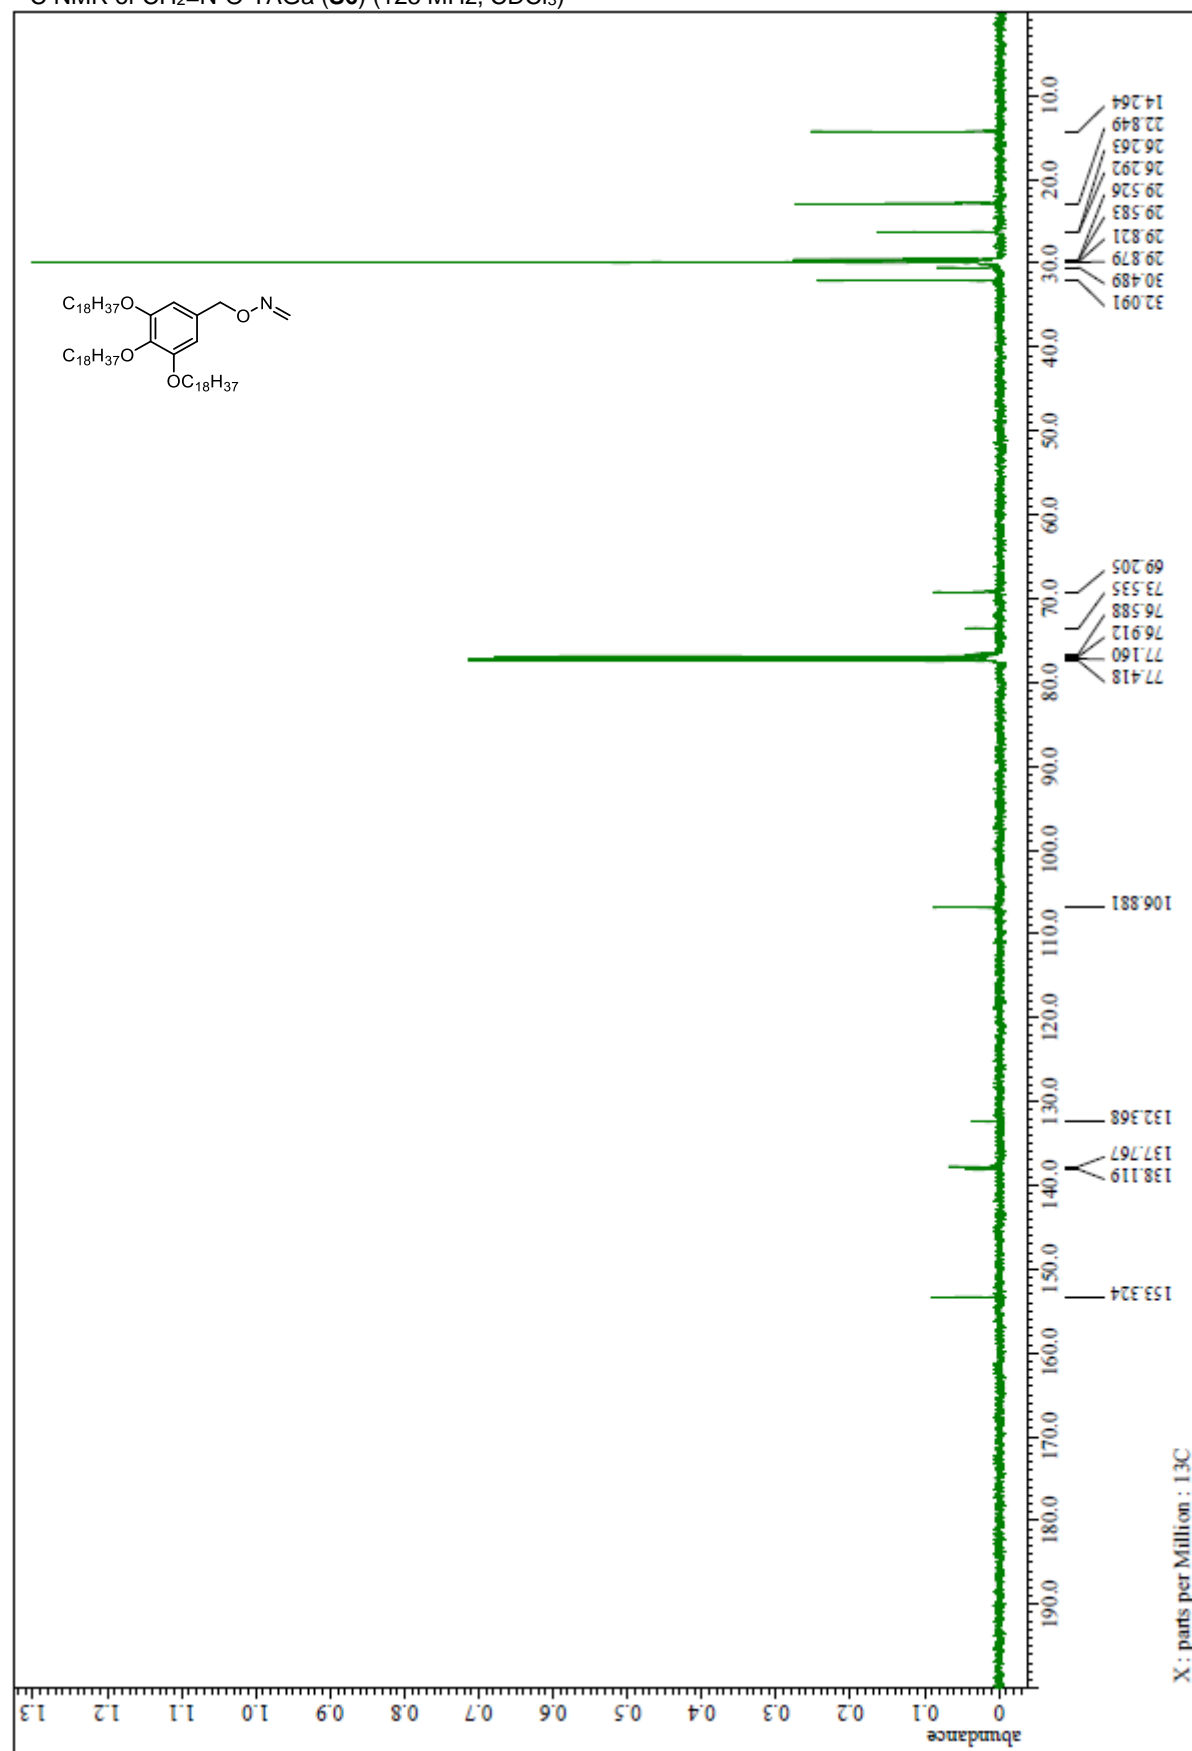

$^1\text{H}$  NMR of Me-HN-O-TAGa (**3**) (500 MHz,  $\text{CDCl}_3$ )

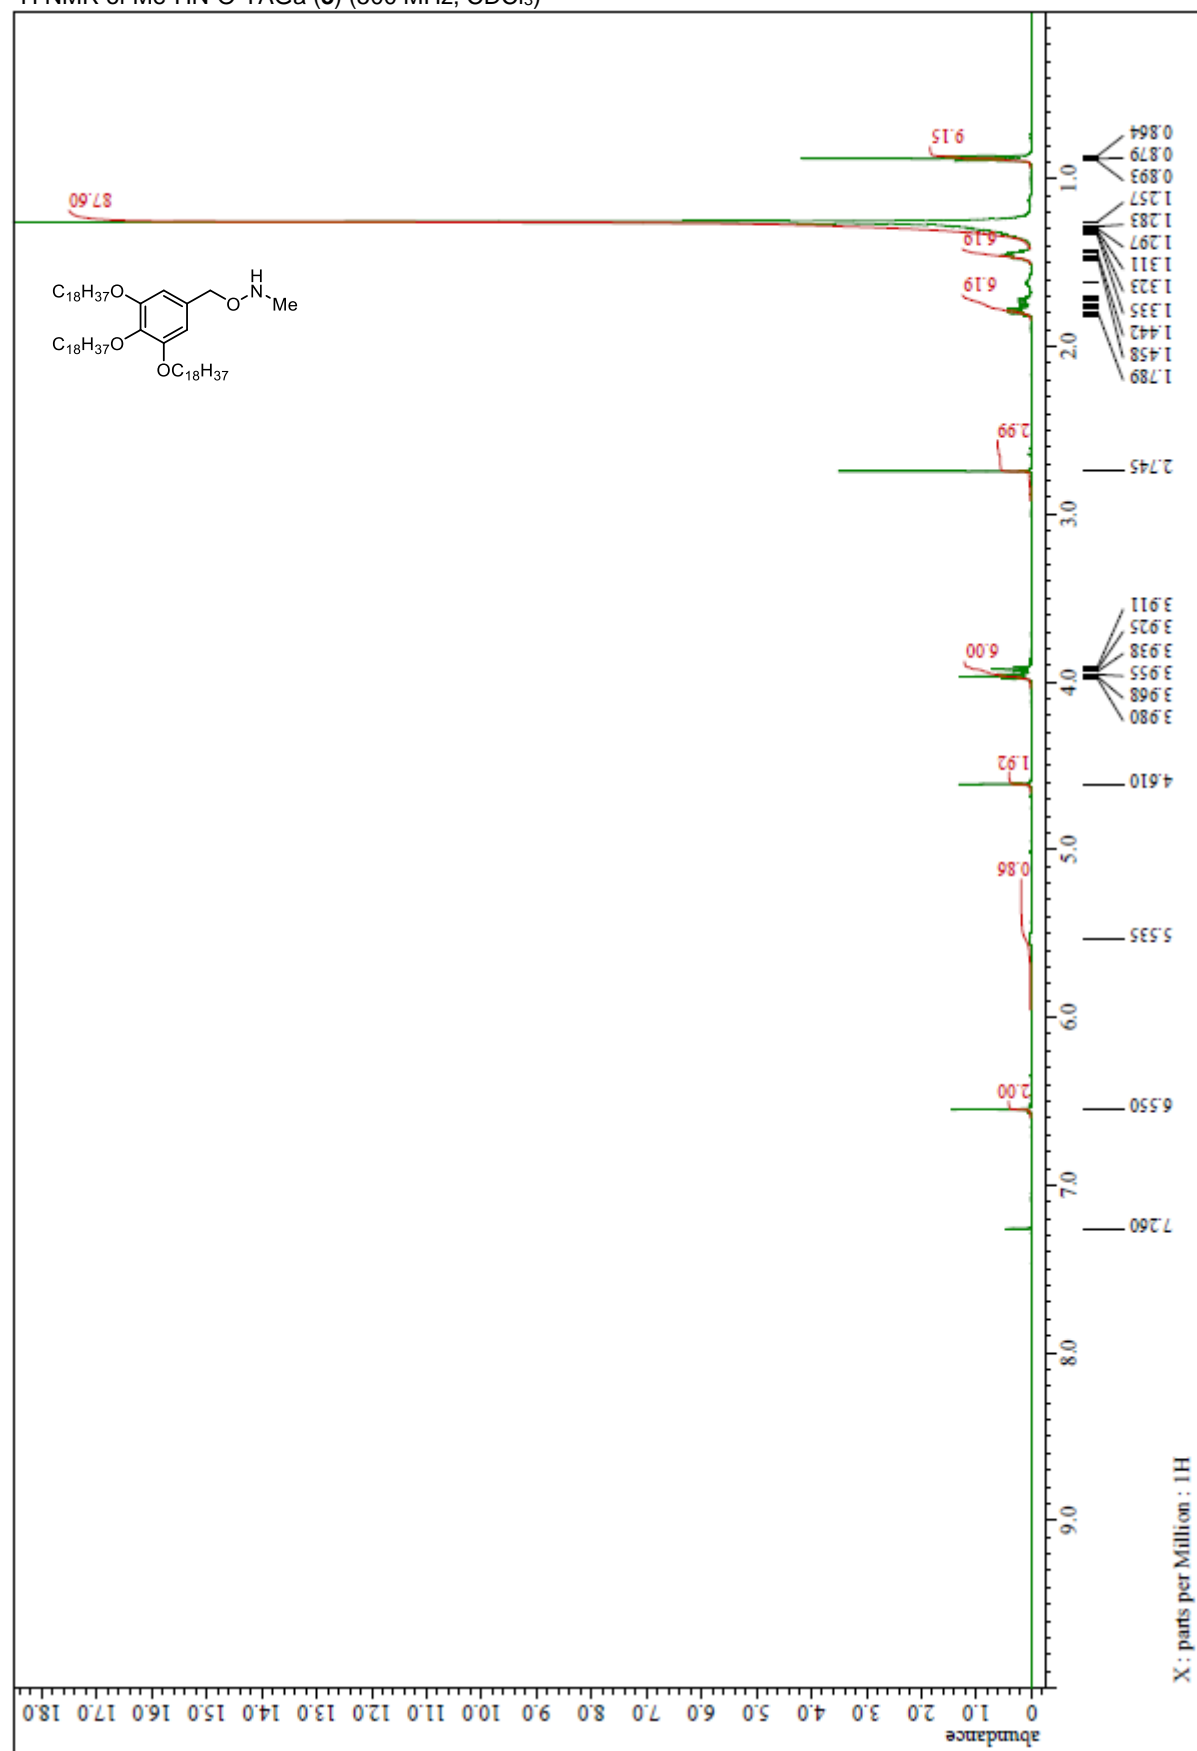

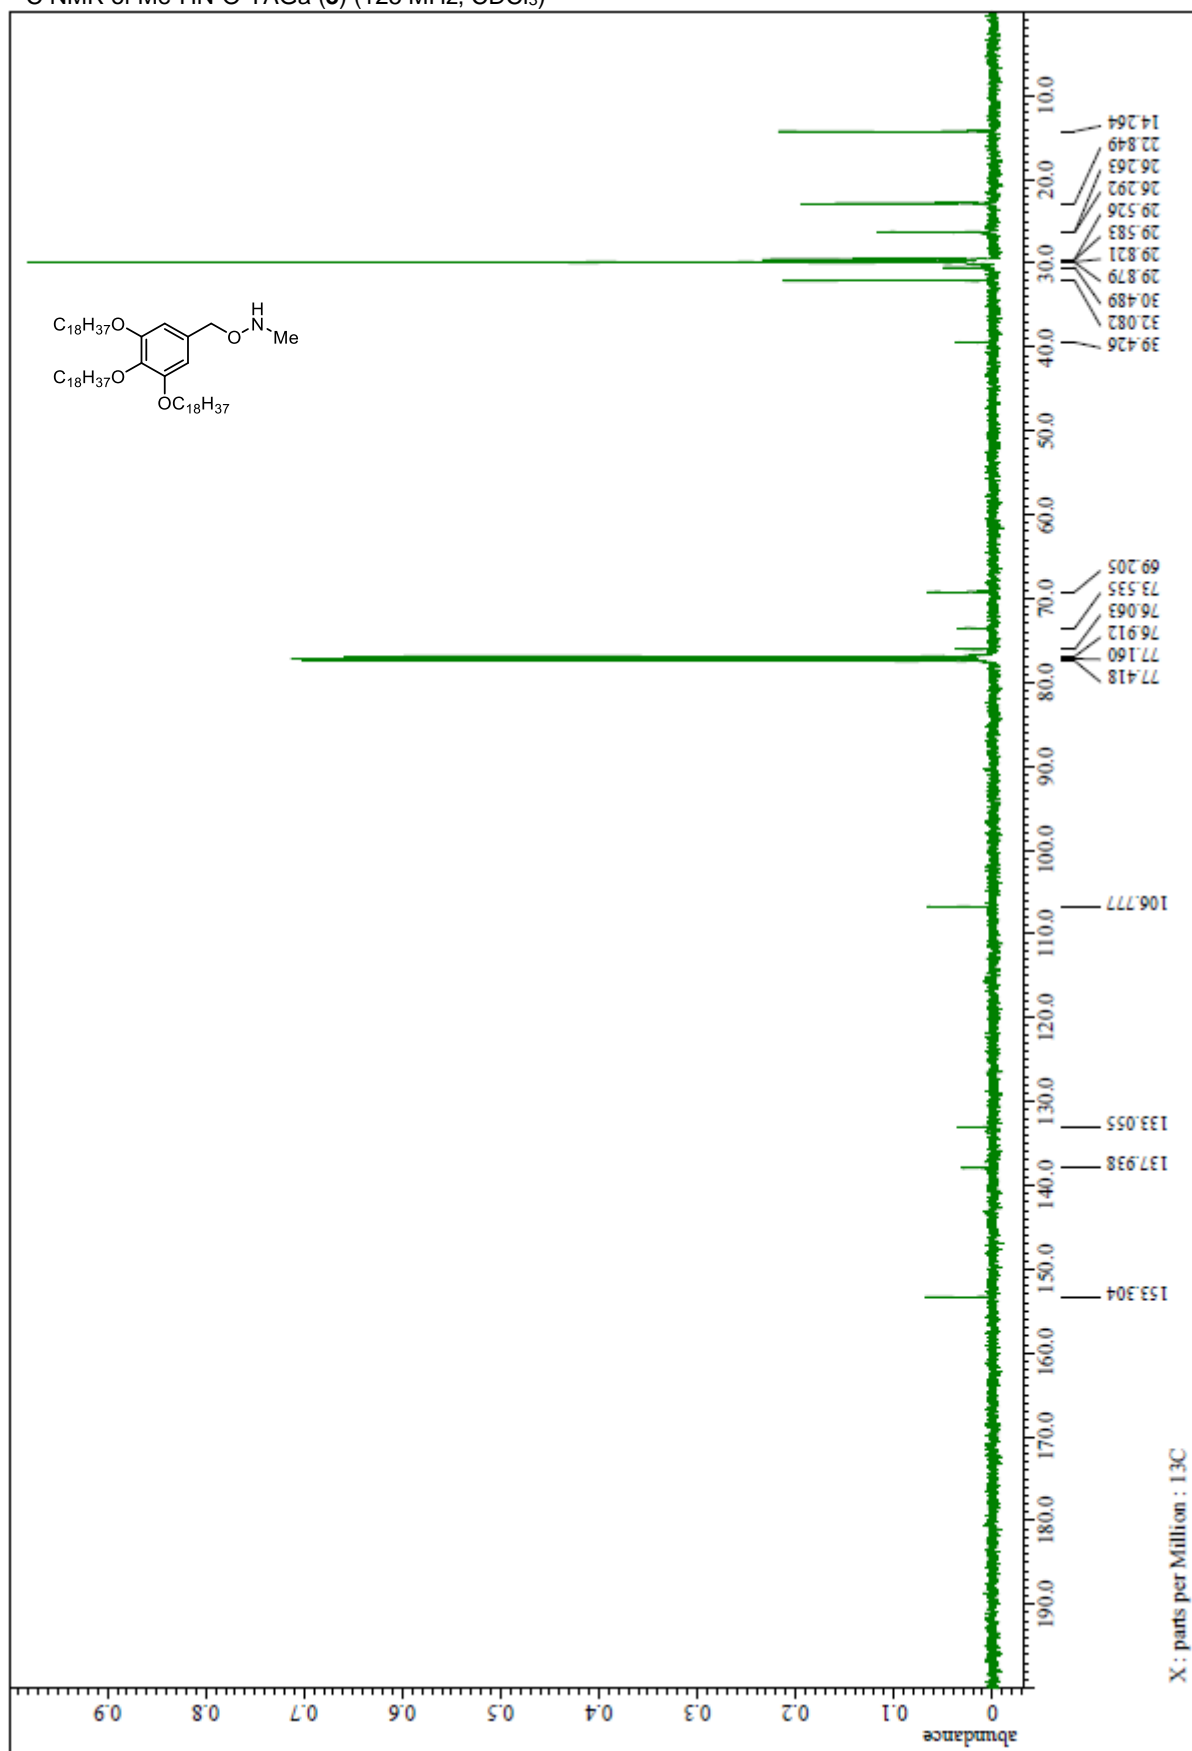

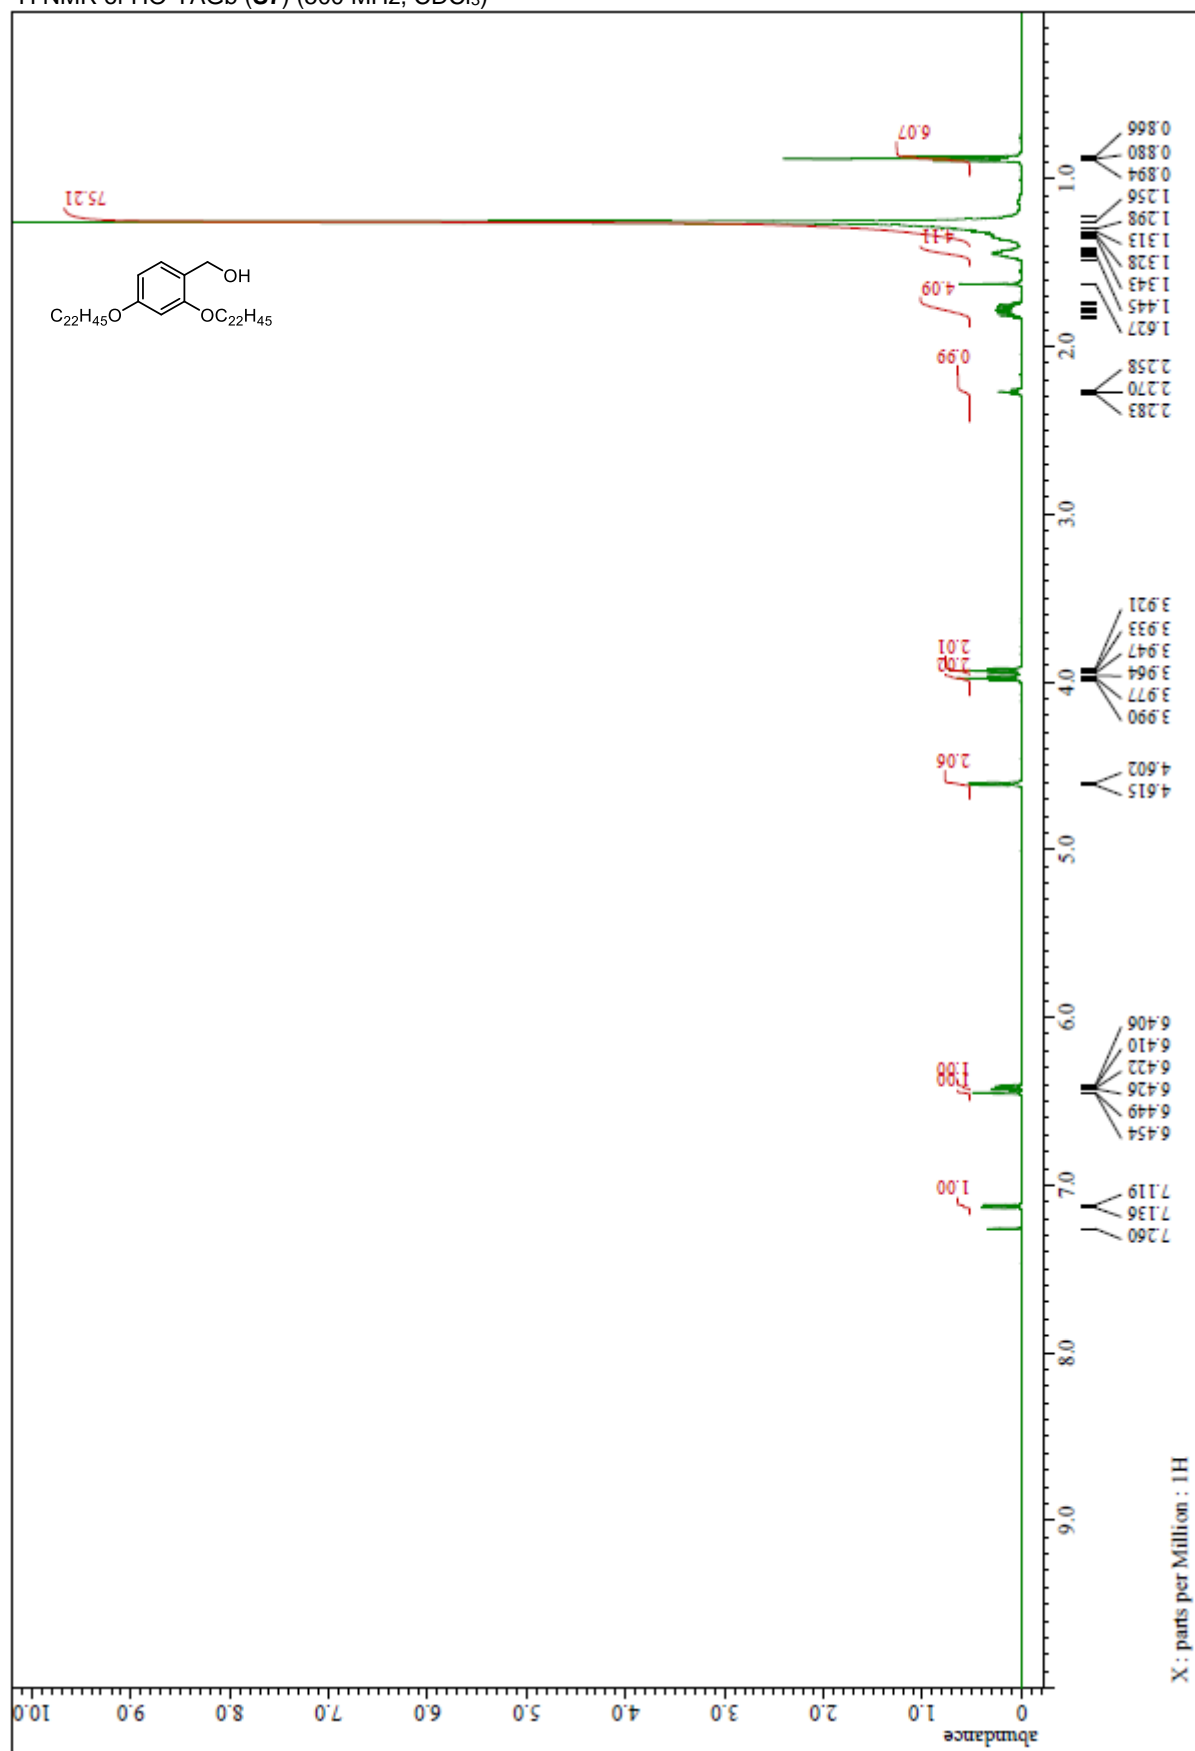

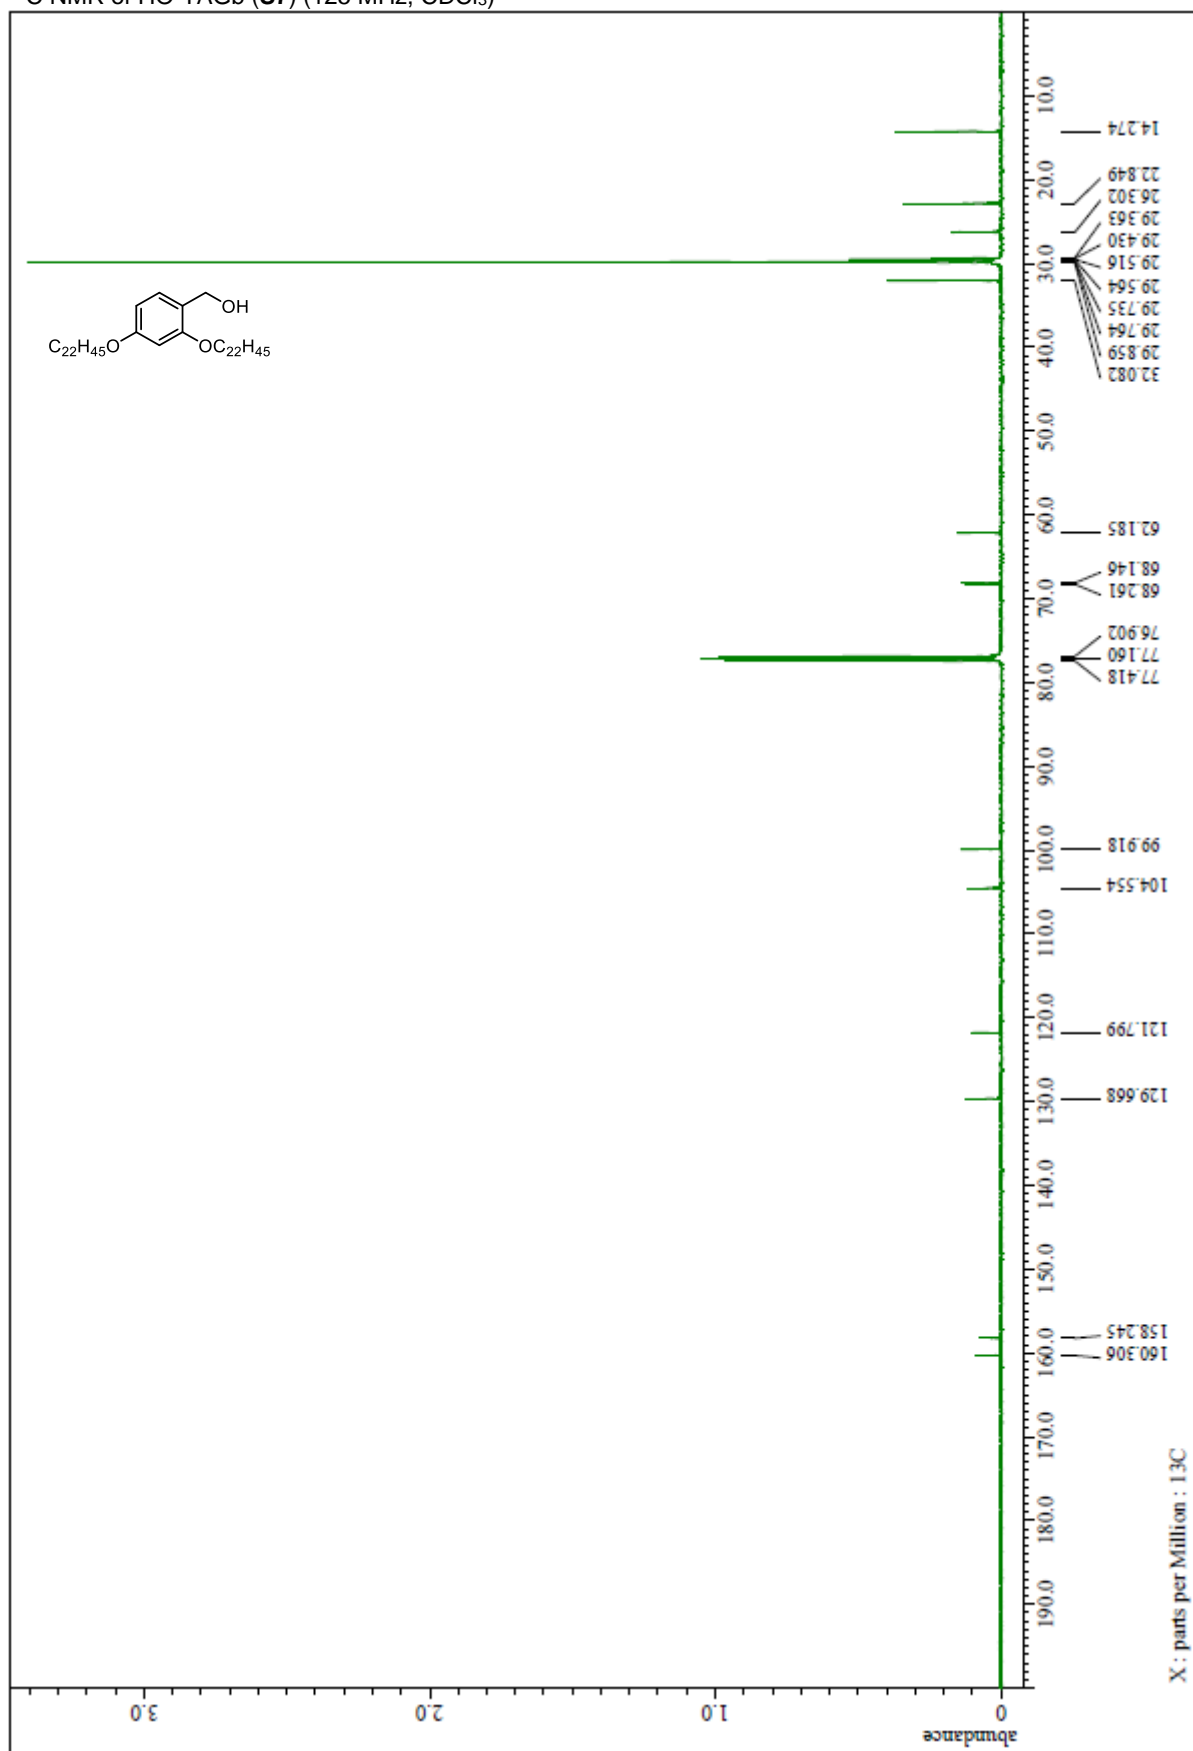

$^1\text{H}$  NMR of Phthalimide-O-TAGb (**S8**) (500 MHz,  $\text{CDCl}_3$ )

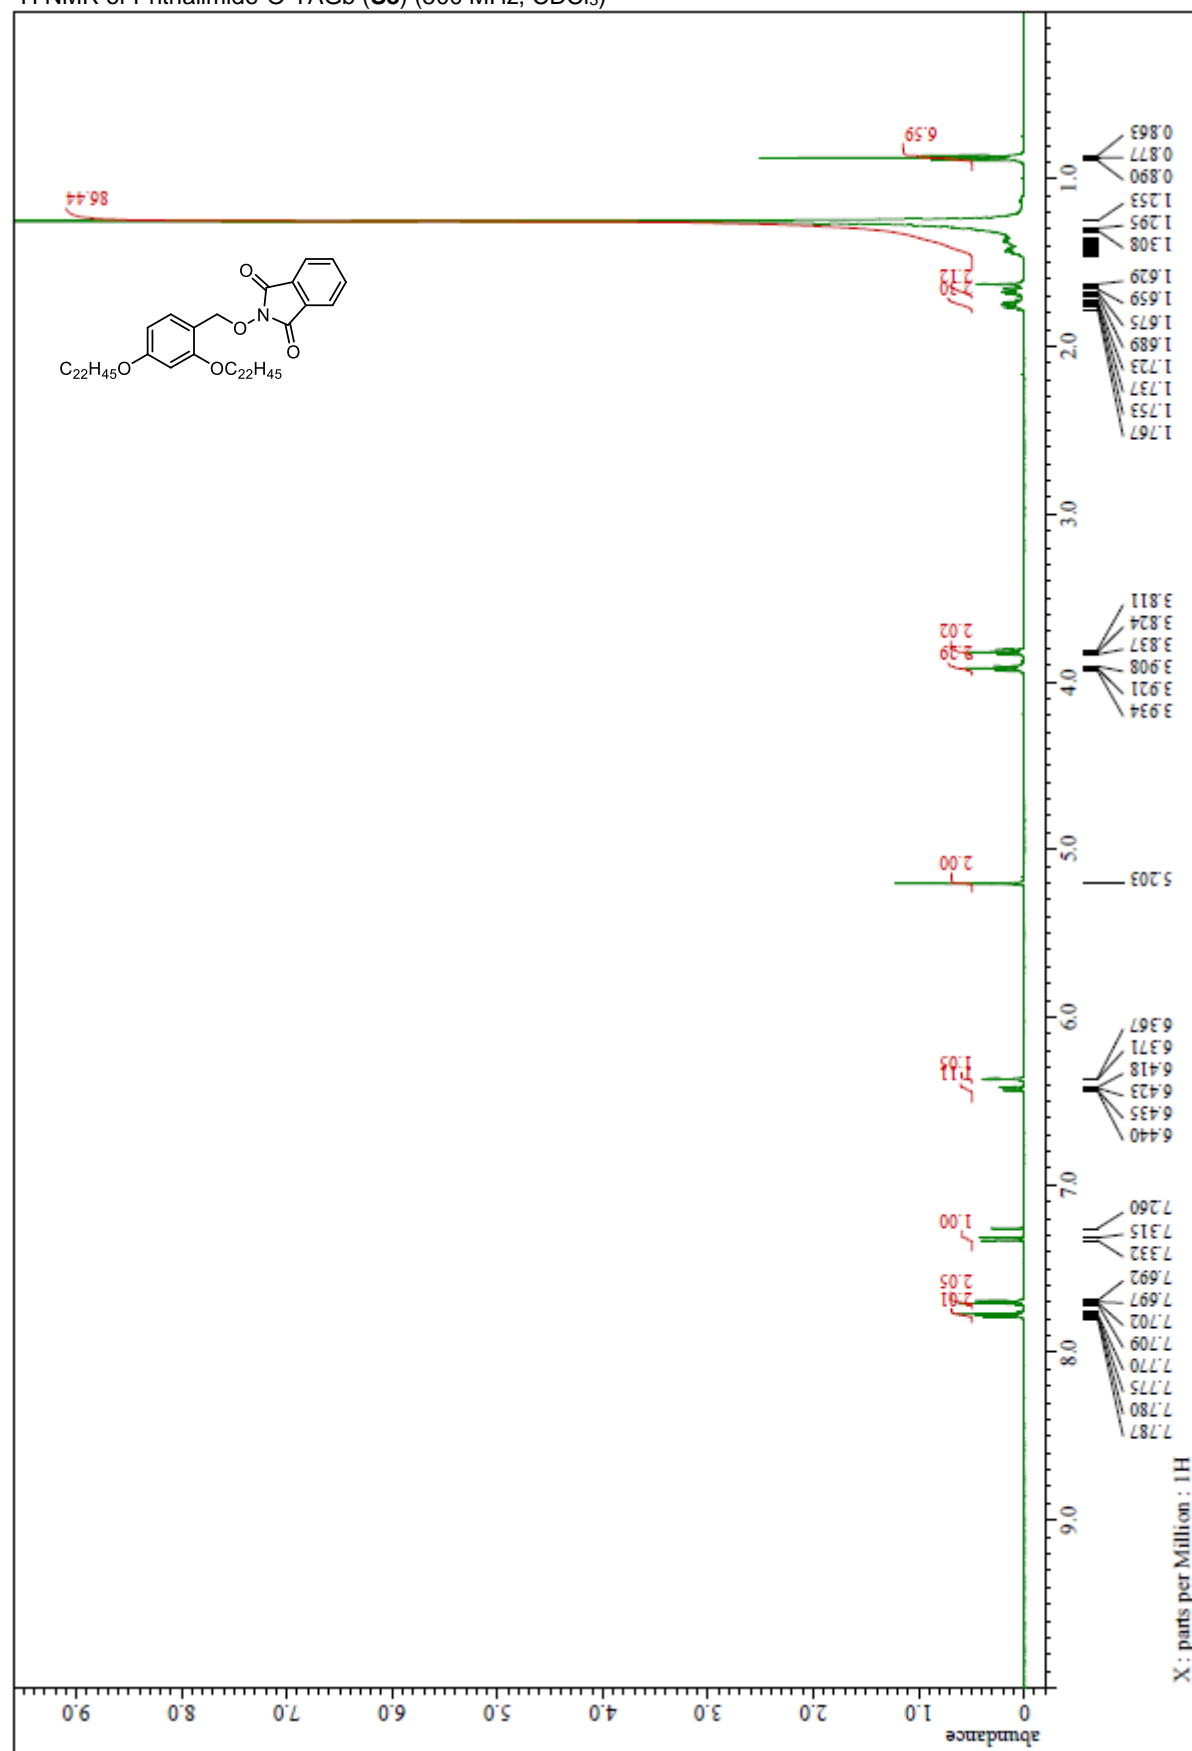

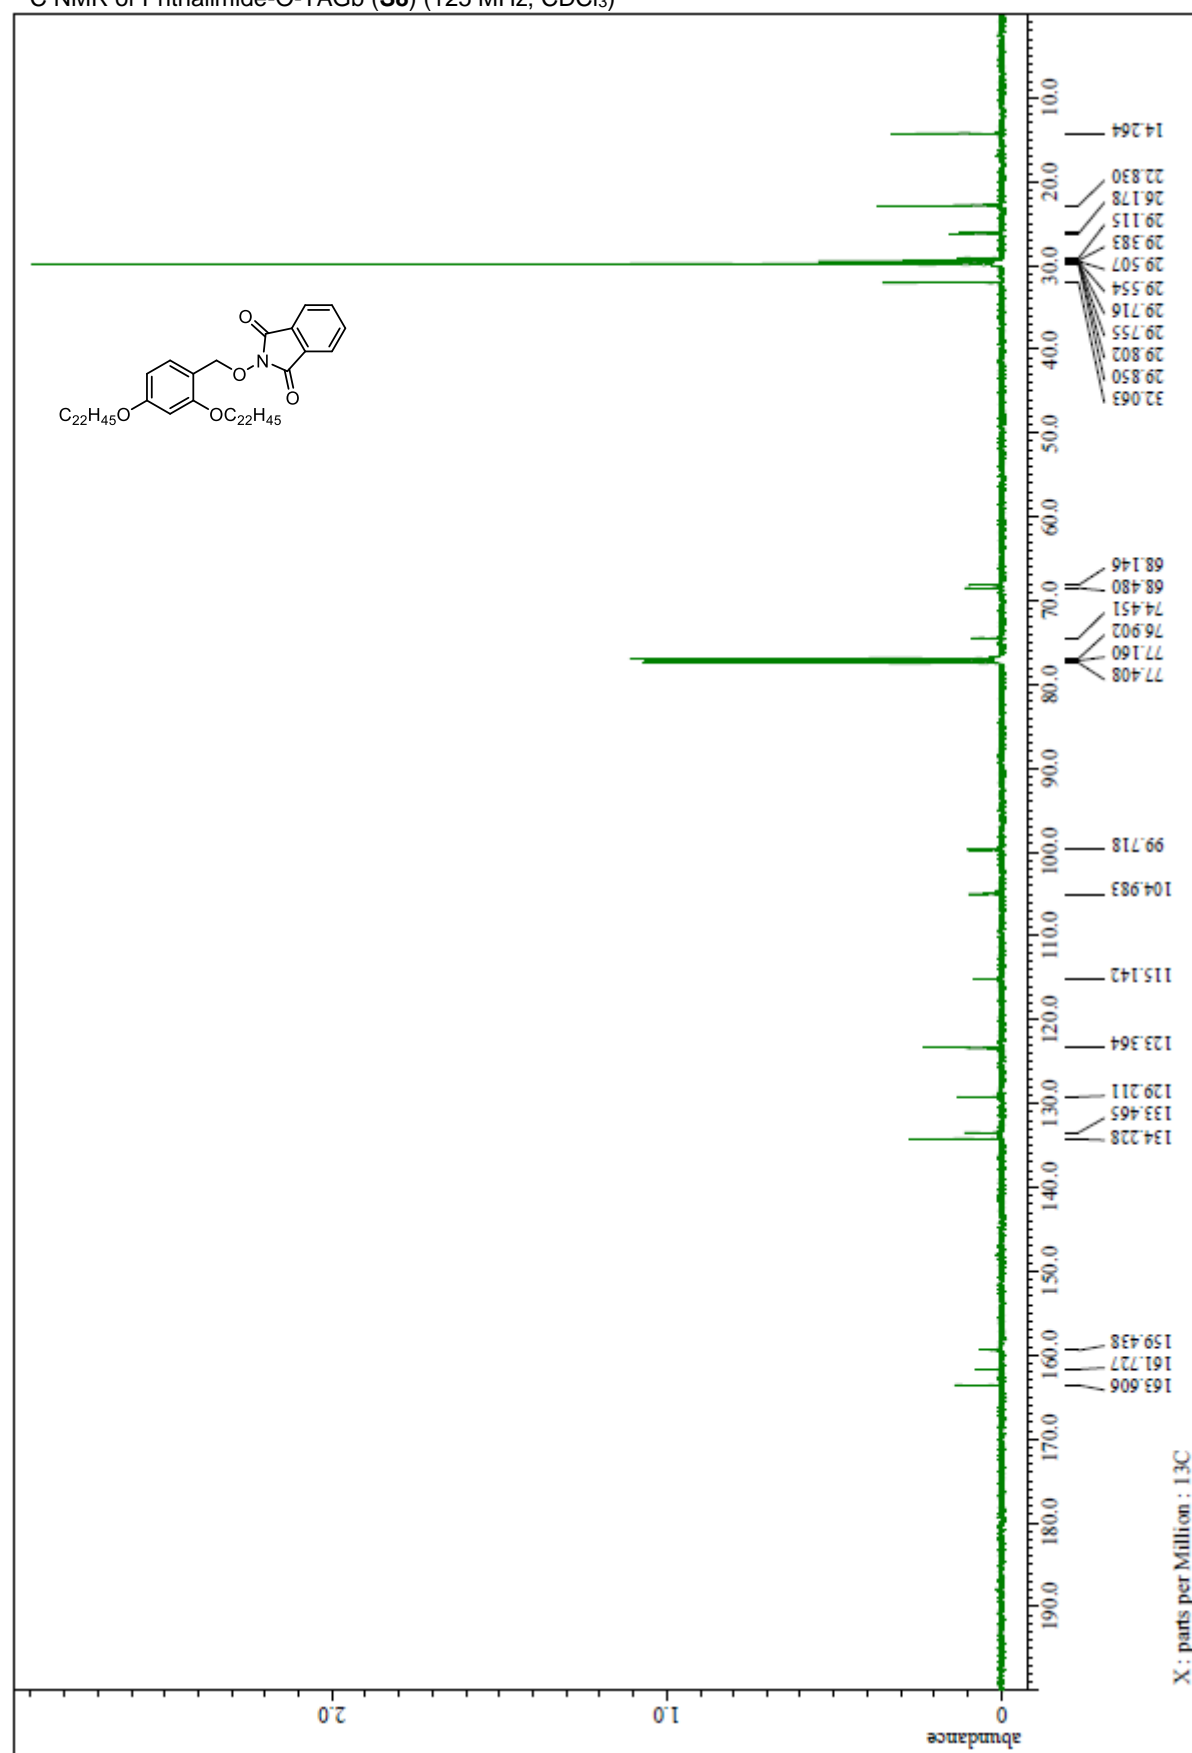



$^1\text{H}$  NMR of  $\text{NH}_2\text{-O-TAGb}$  (**S9**) (500 MHz,  $\text{CDCl}_3$ )

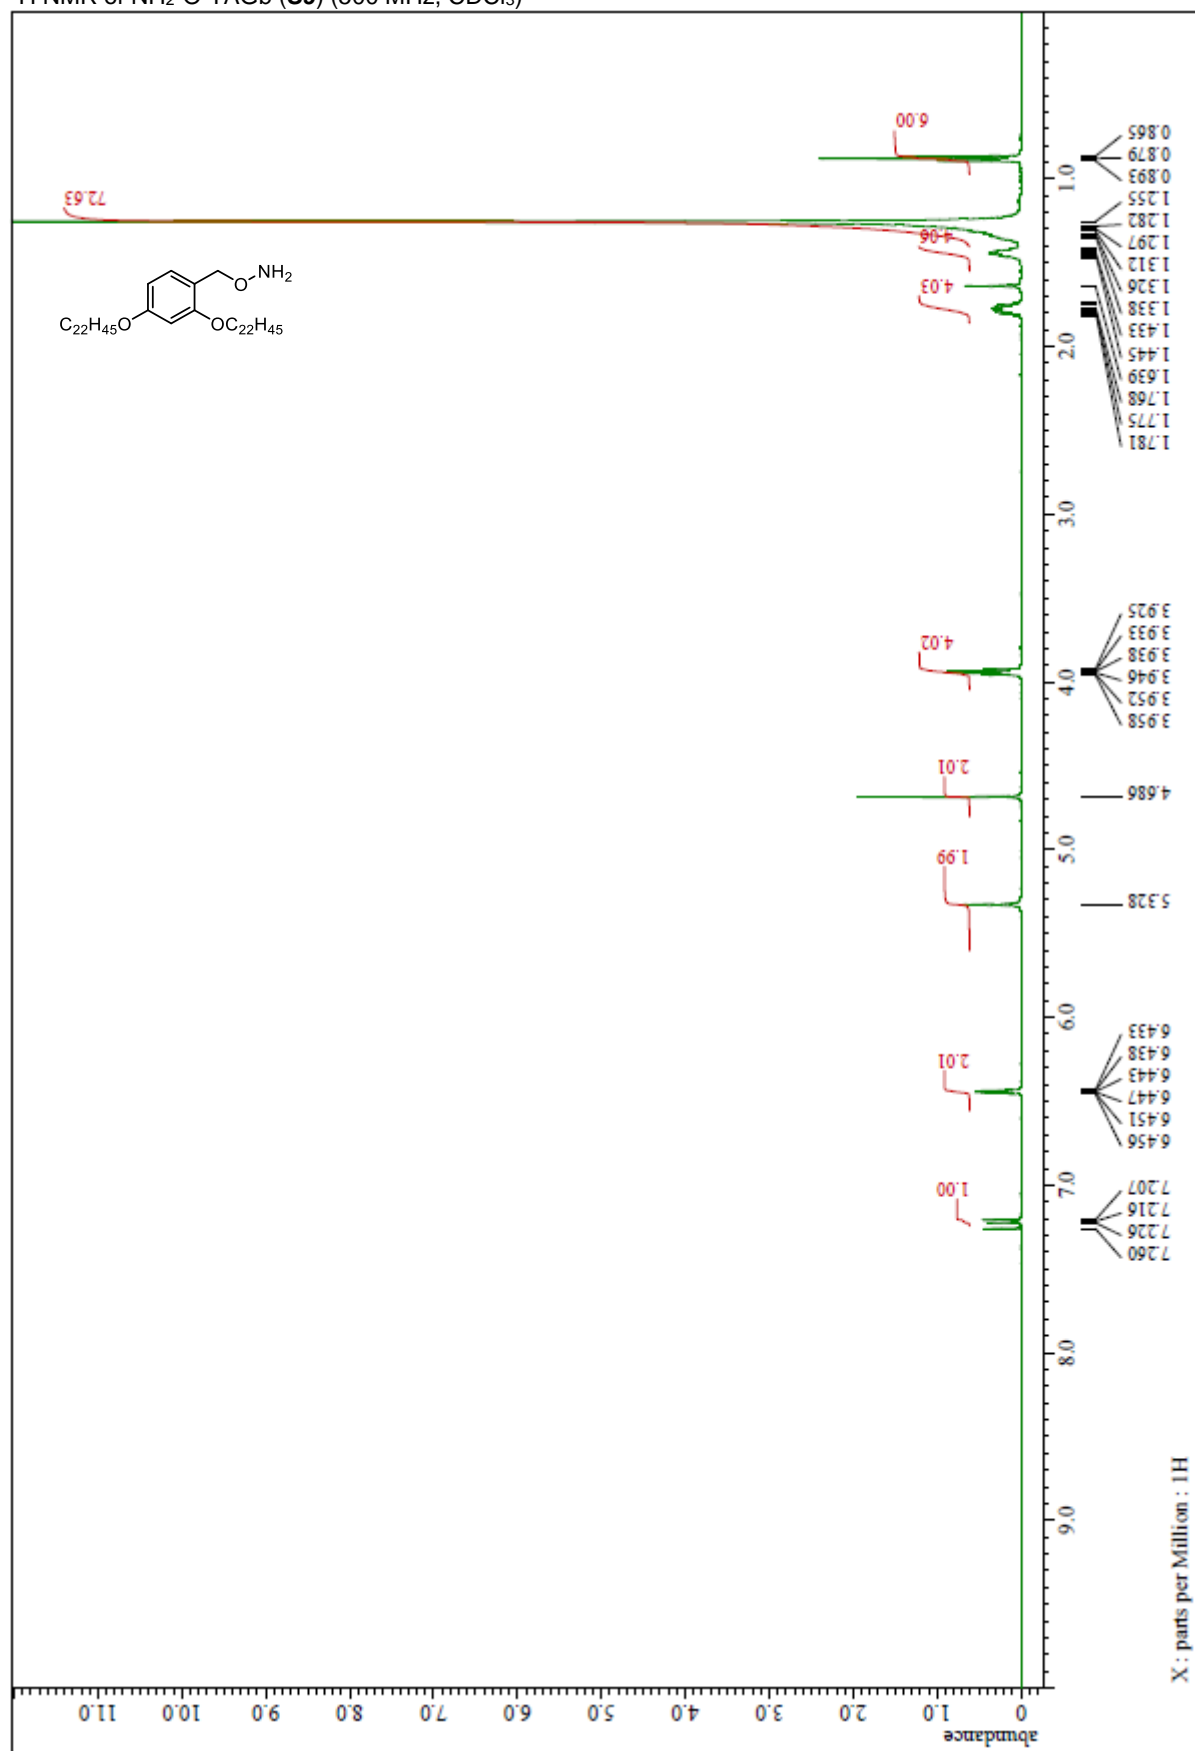

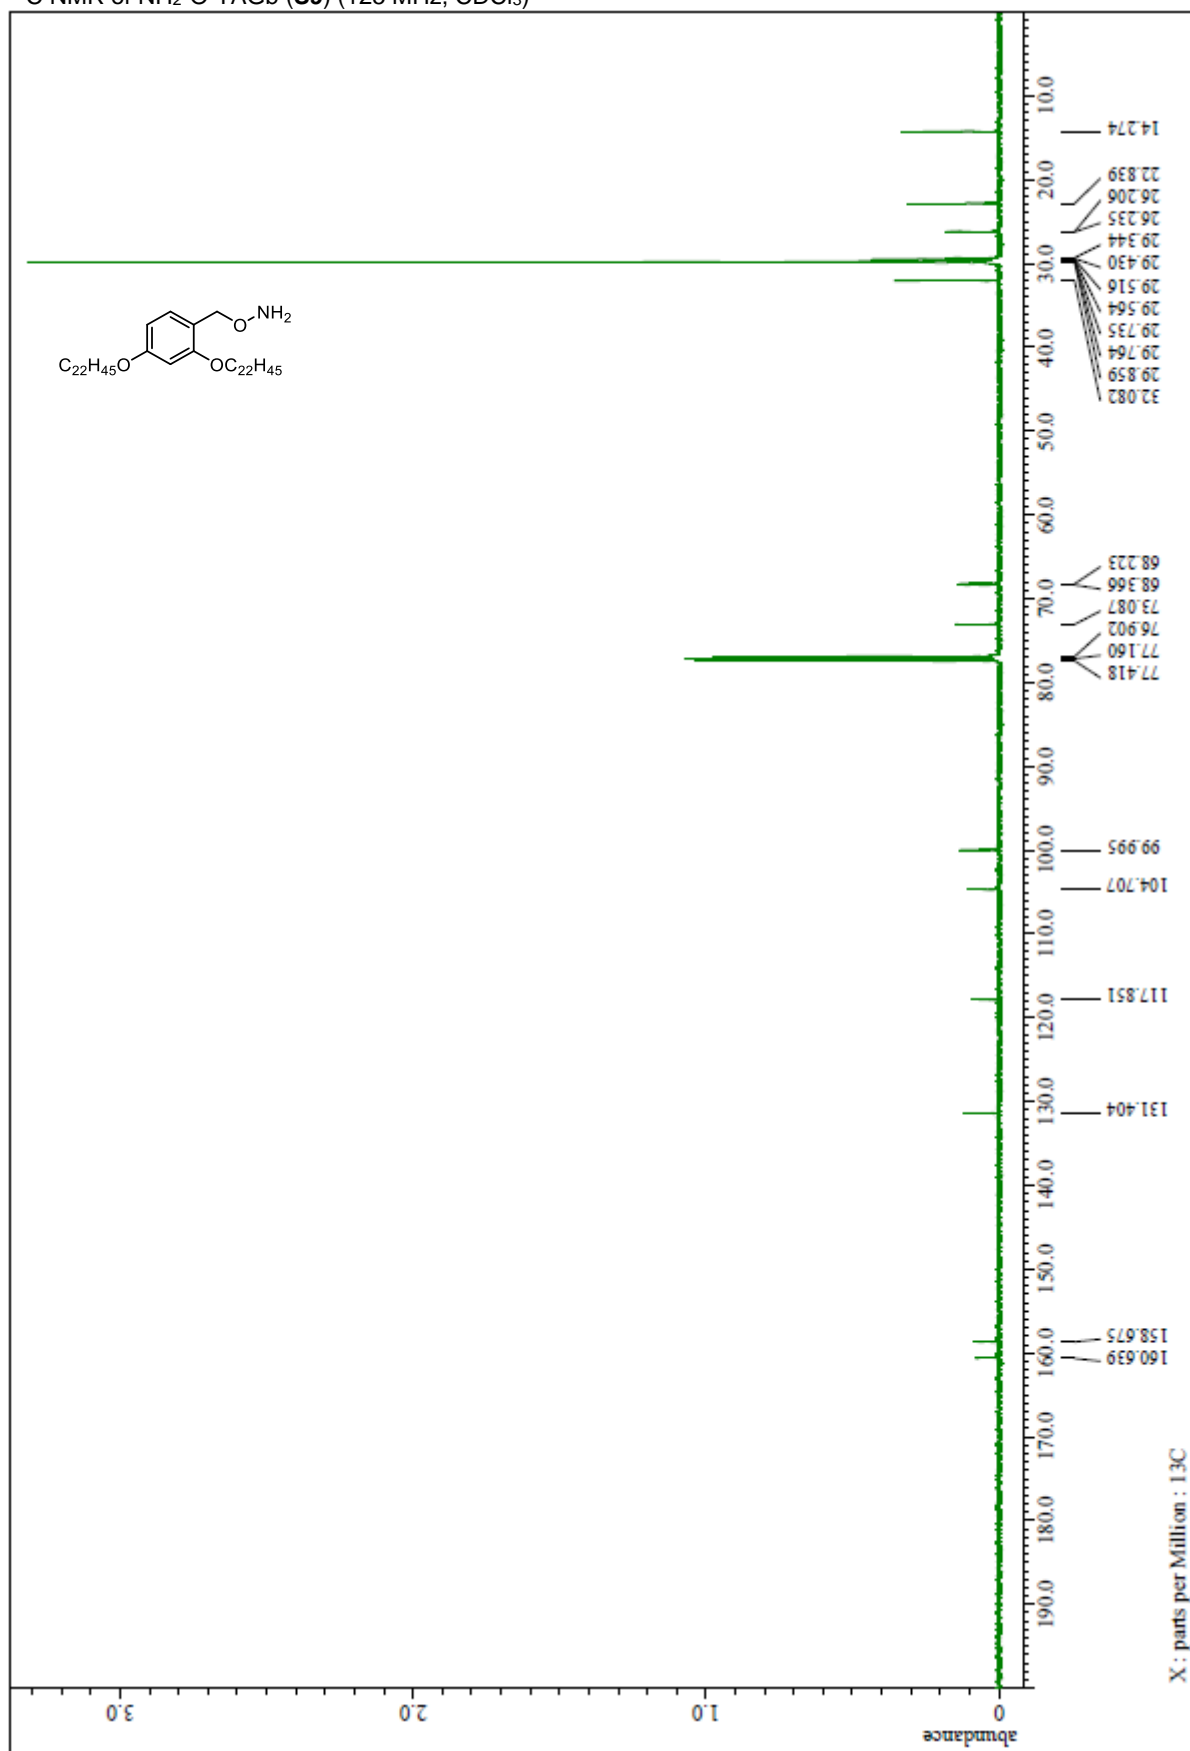

$^1\text{H}$  NMR of  $\text{CH}_2=\text{N}-\text{O}-\text{TAGb}$  (**S10**) (500 MHz,  $\text{CDCl}_3$ )

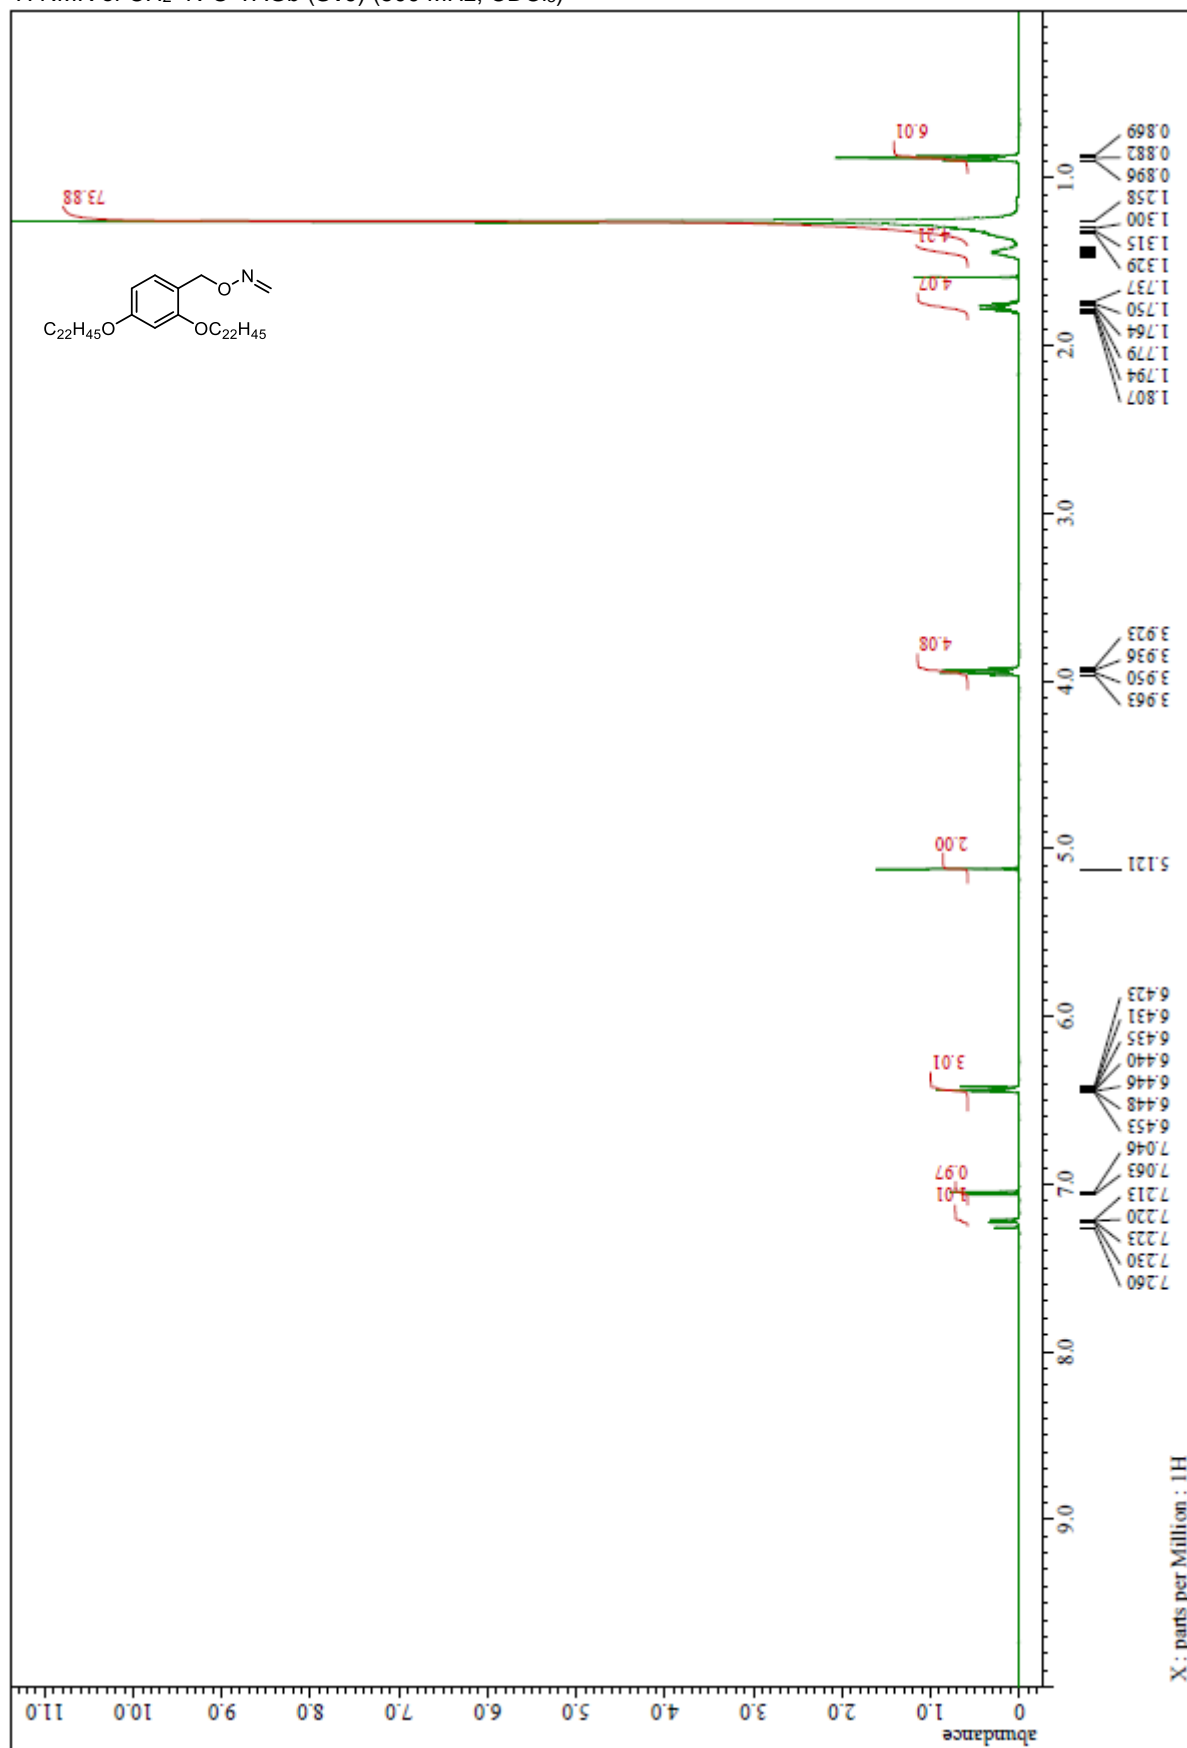

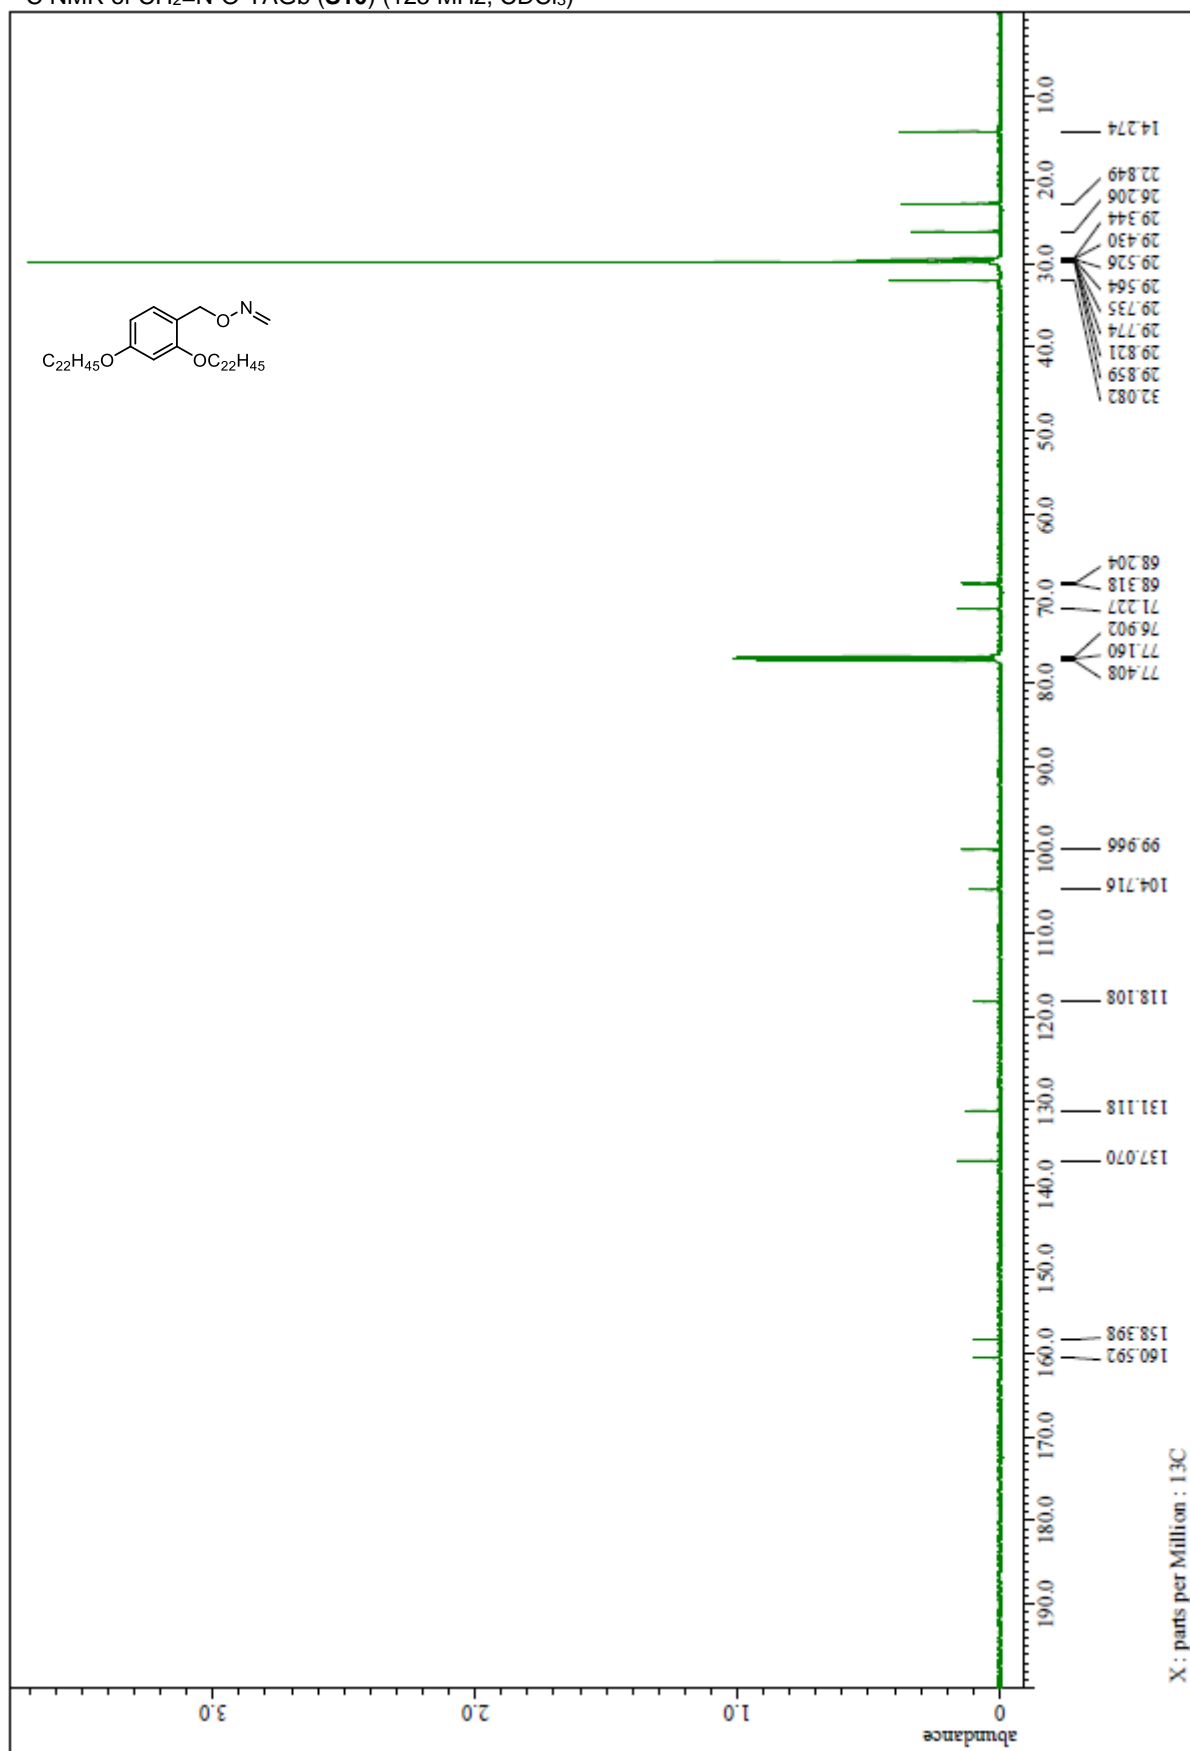

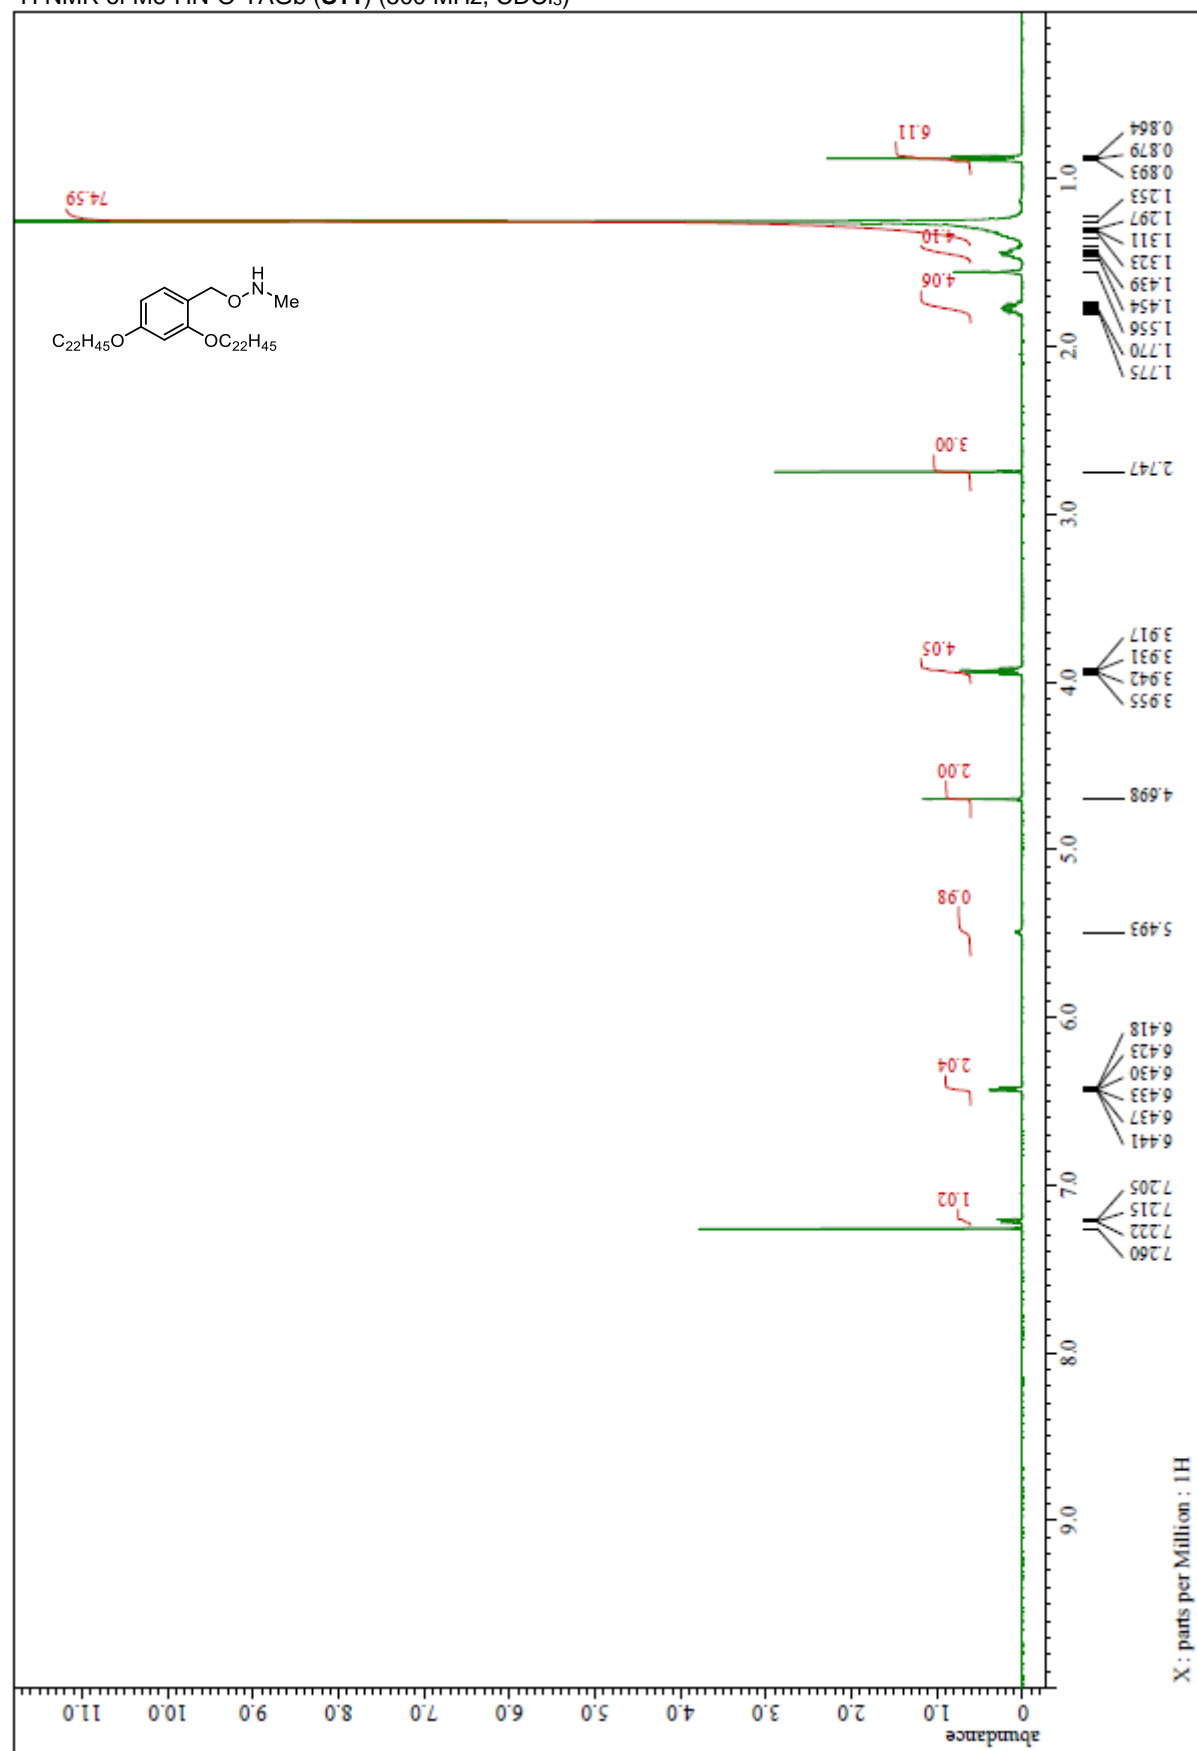

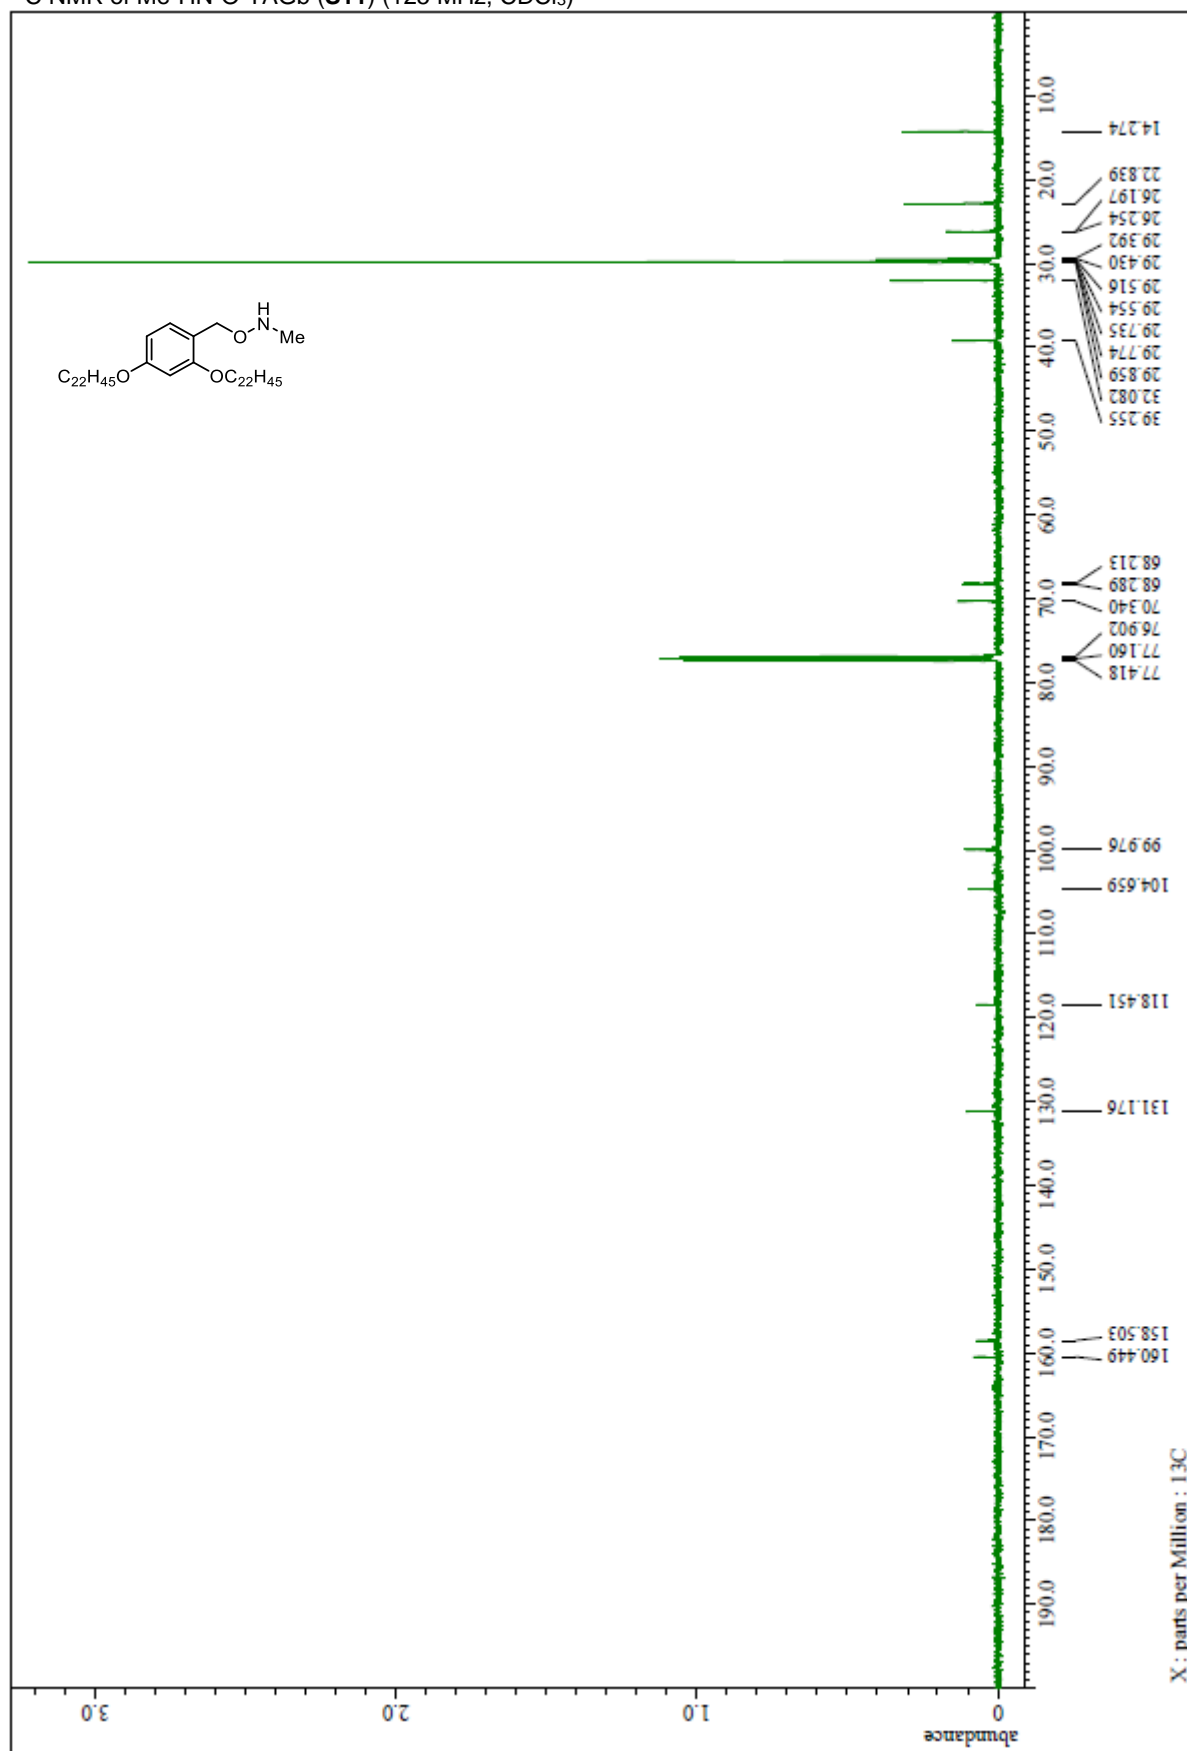

$^1\text{H}$  NMR of Fmoc-Ala-(Me)N-O-TAGa (**S12**) (500 MHz,  $\text{CDCl}_3$ )

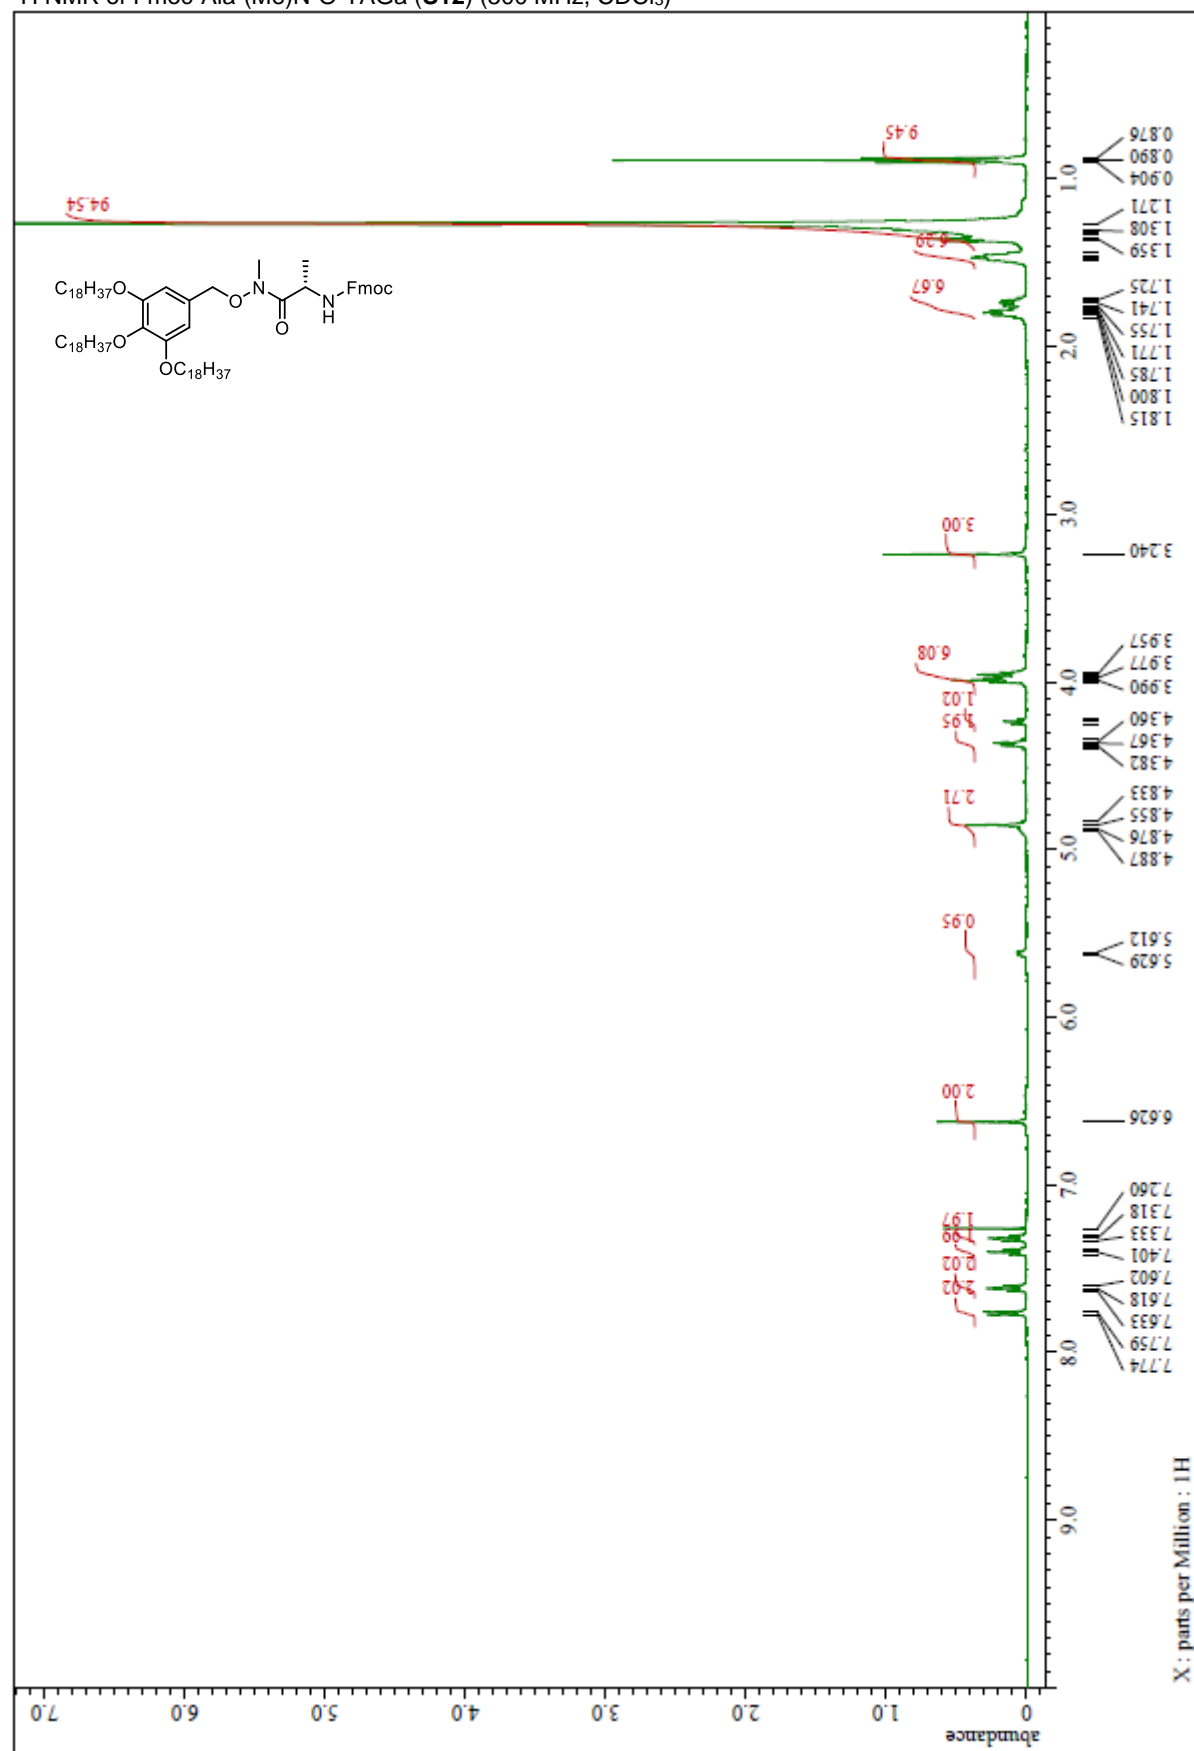

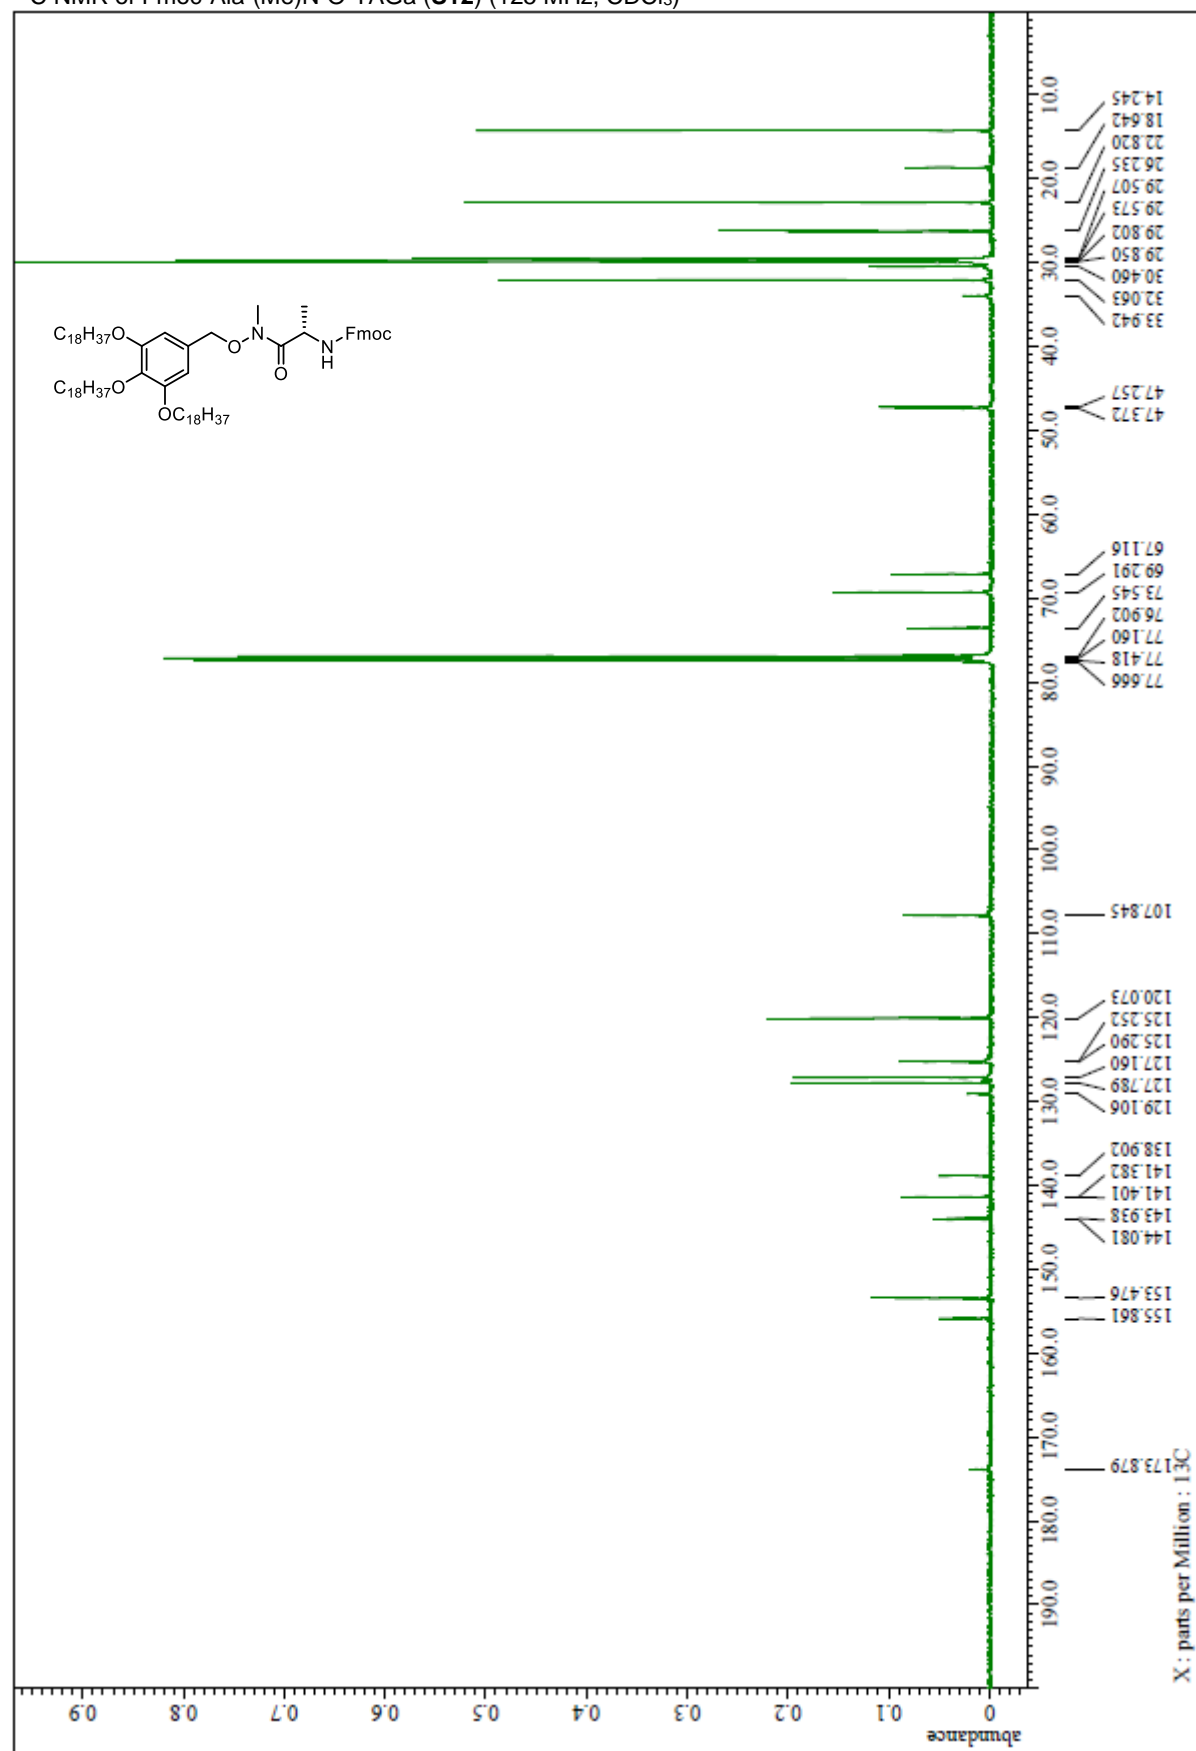



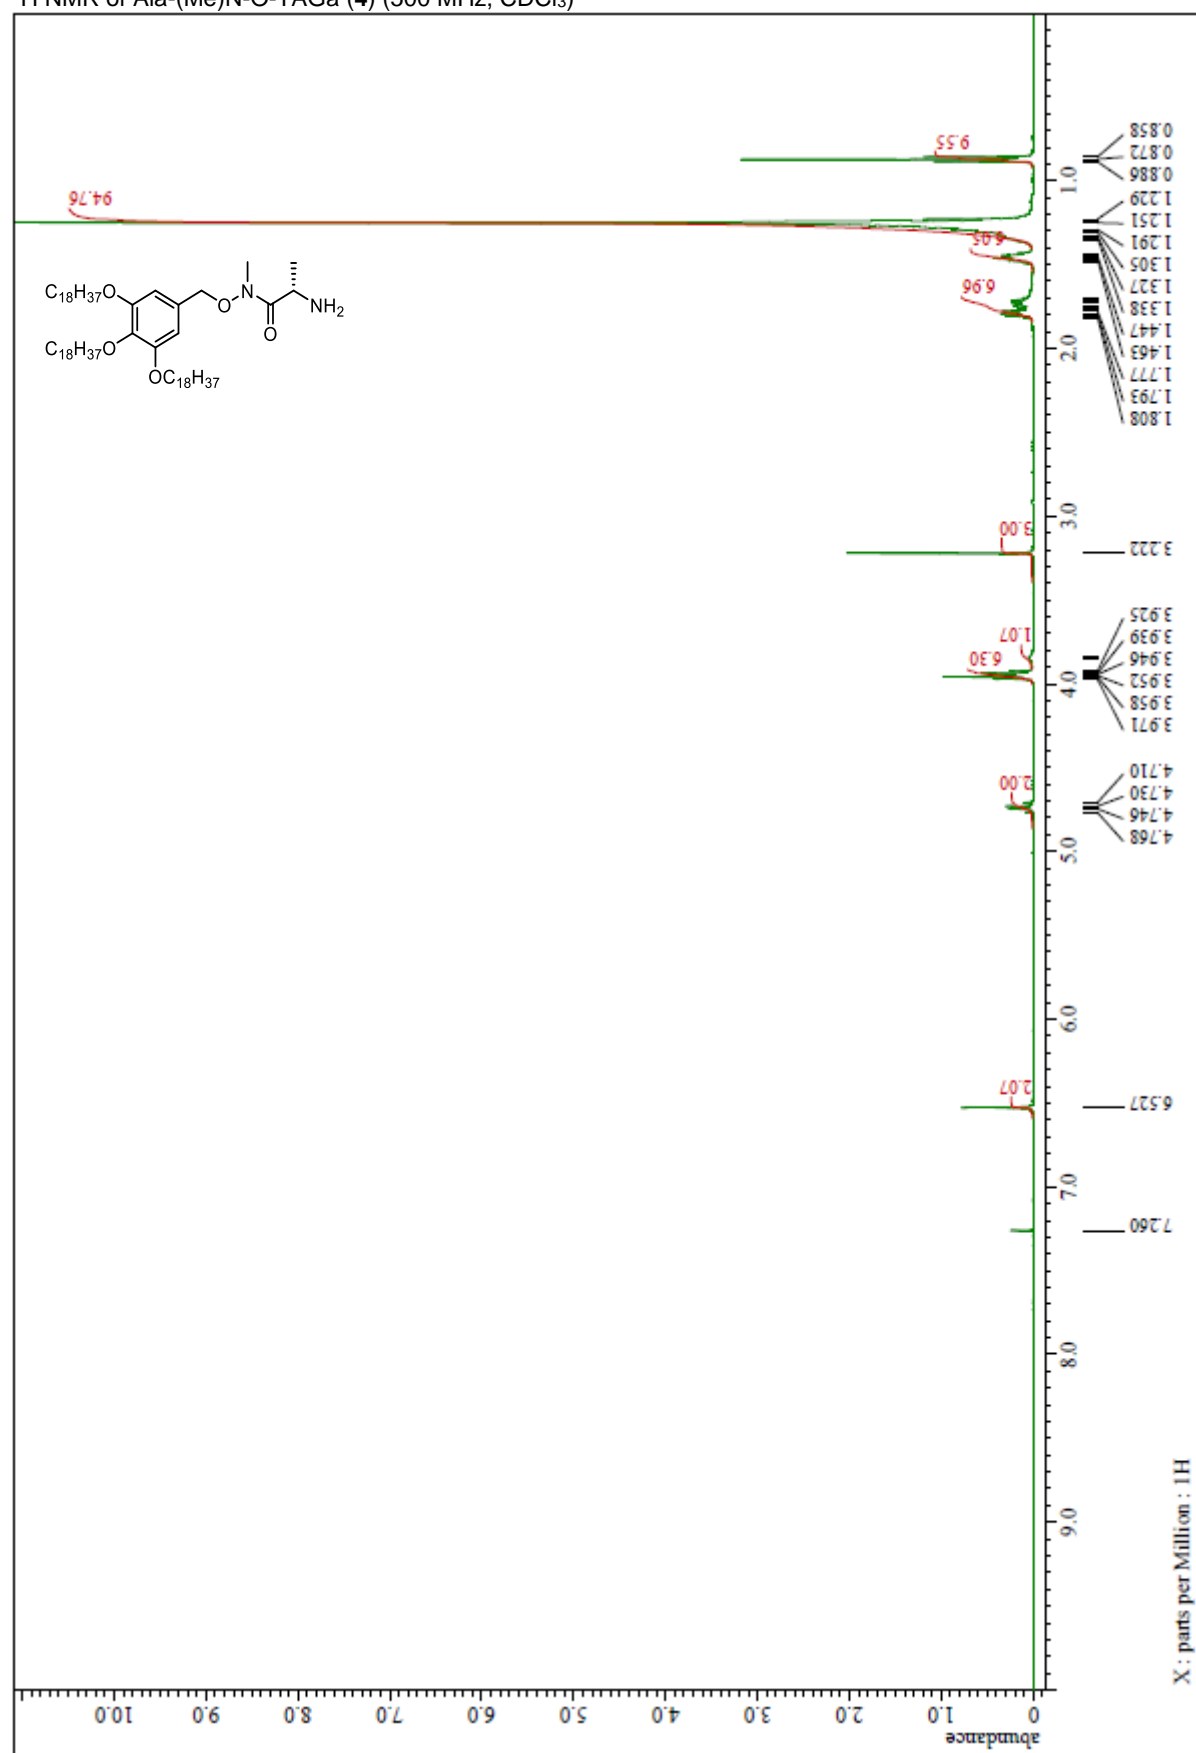

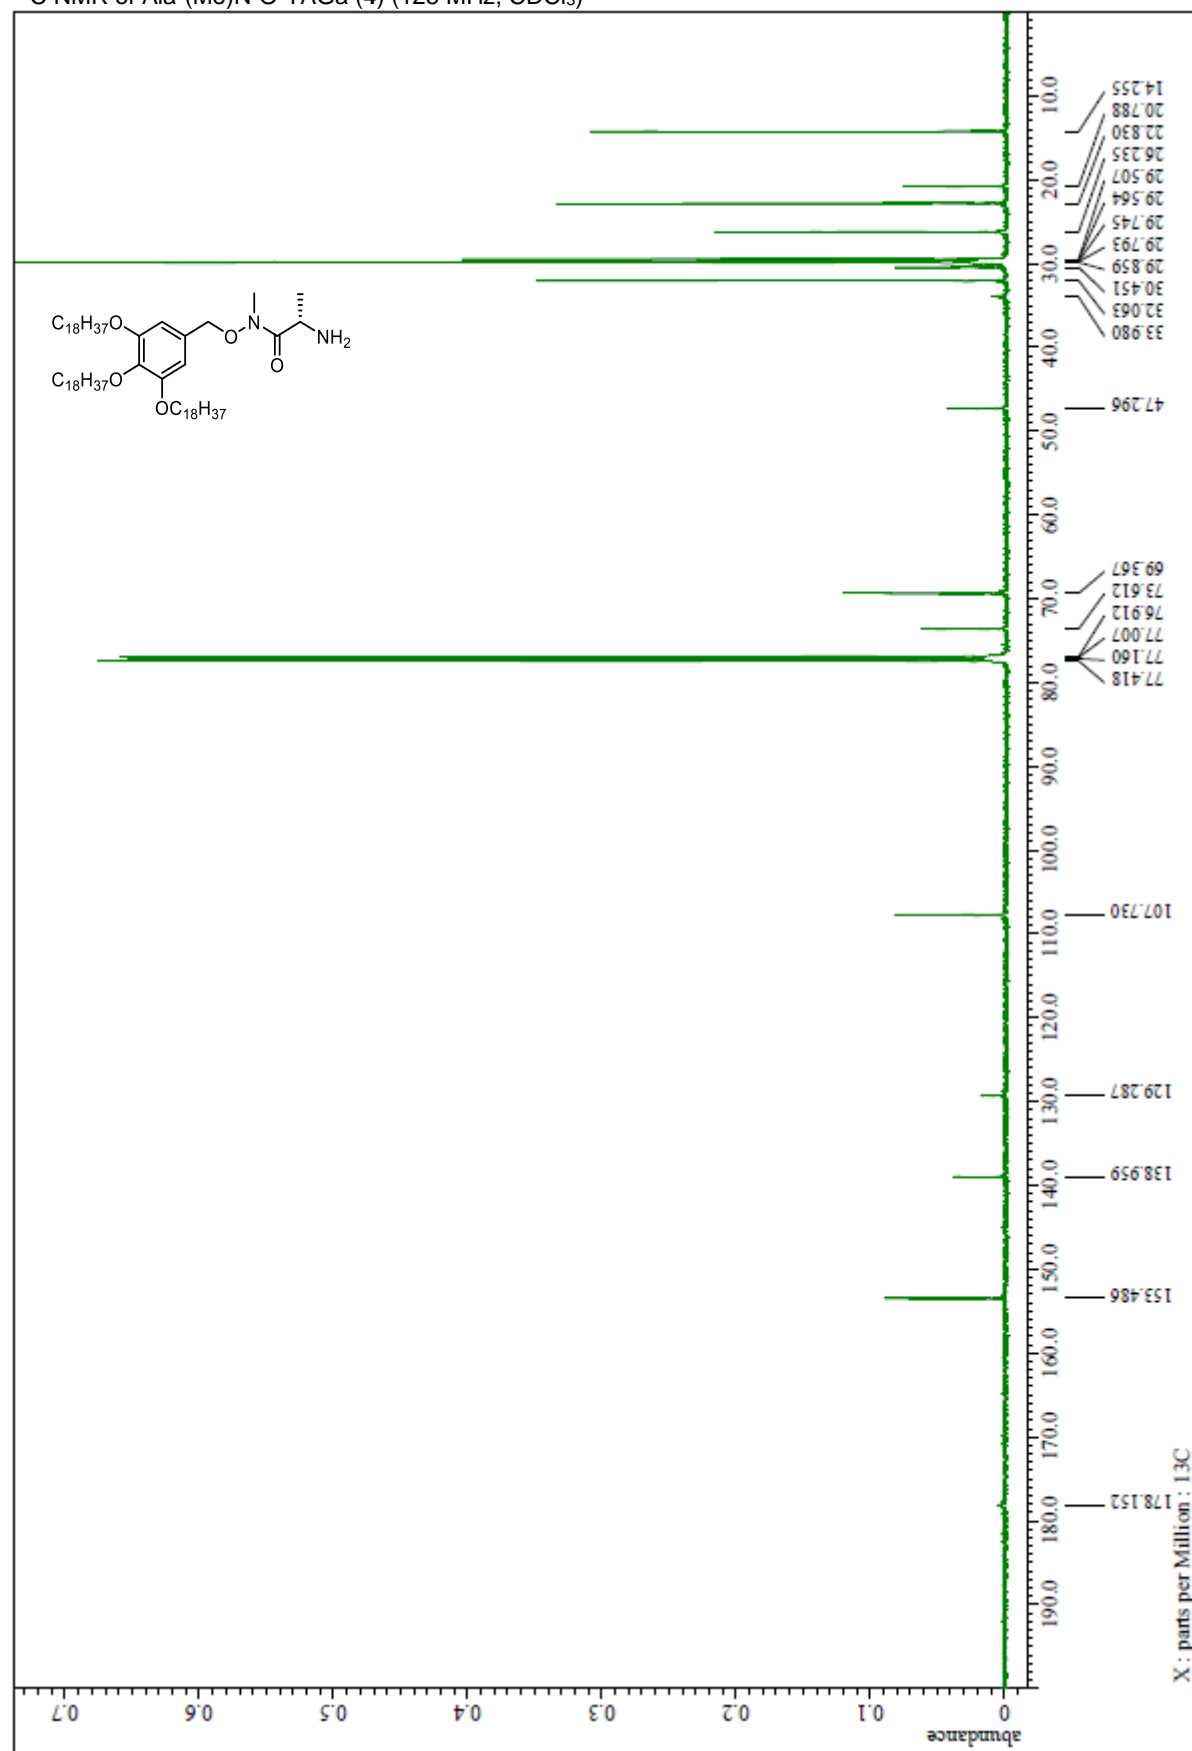

$^1\text{H}$  NMR of Fmoc-Asn-Ala-(Me)N-O-TAGa (**S13**) (500 MHz,  $\text{CDCl}_3$ )

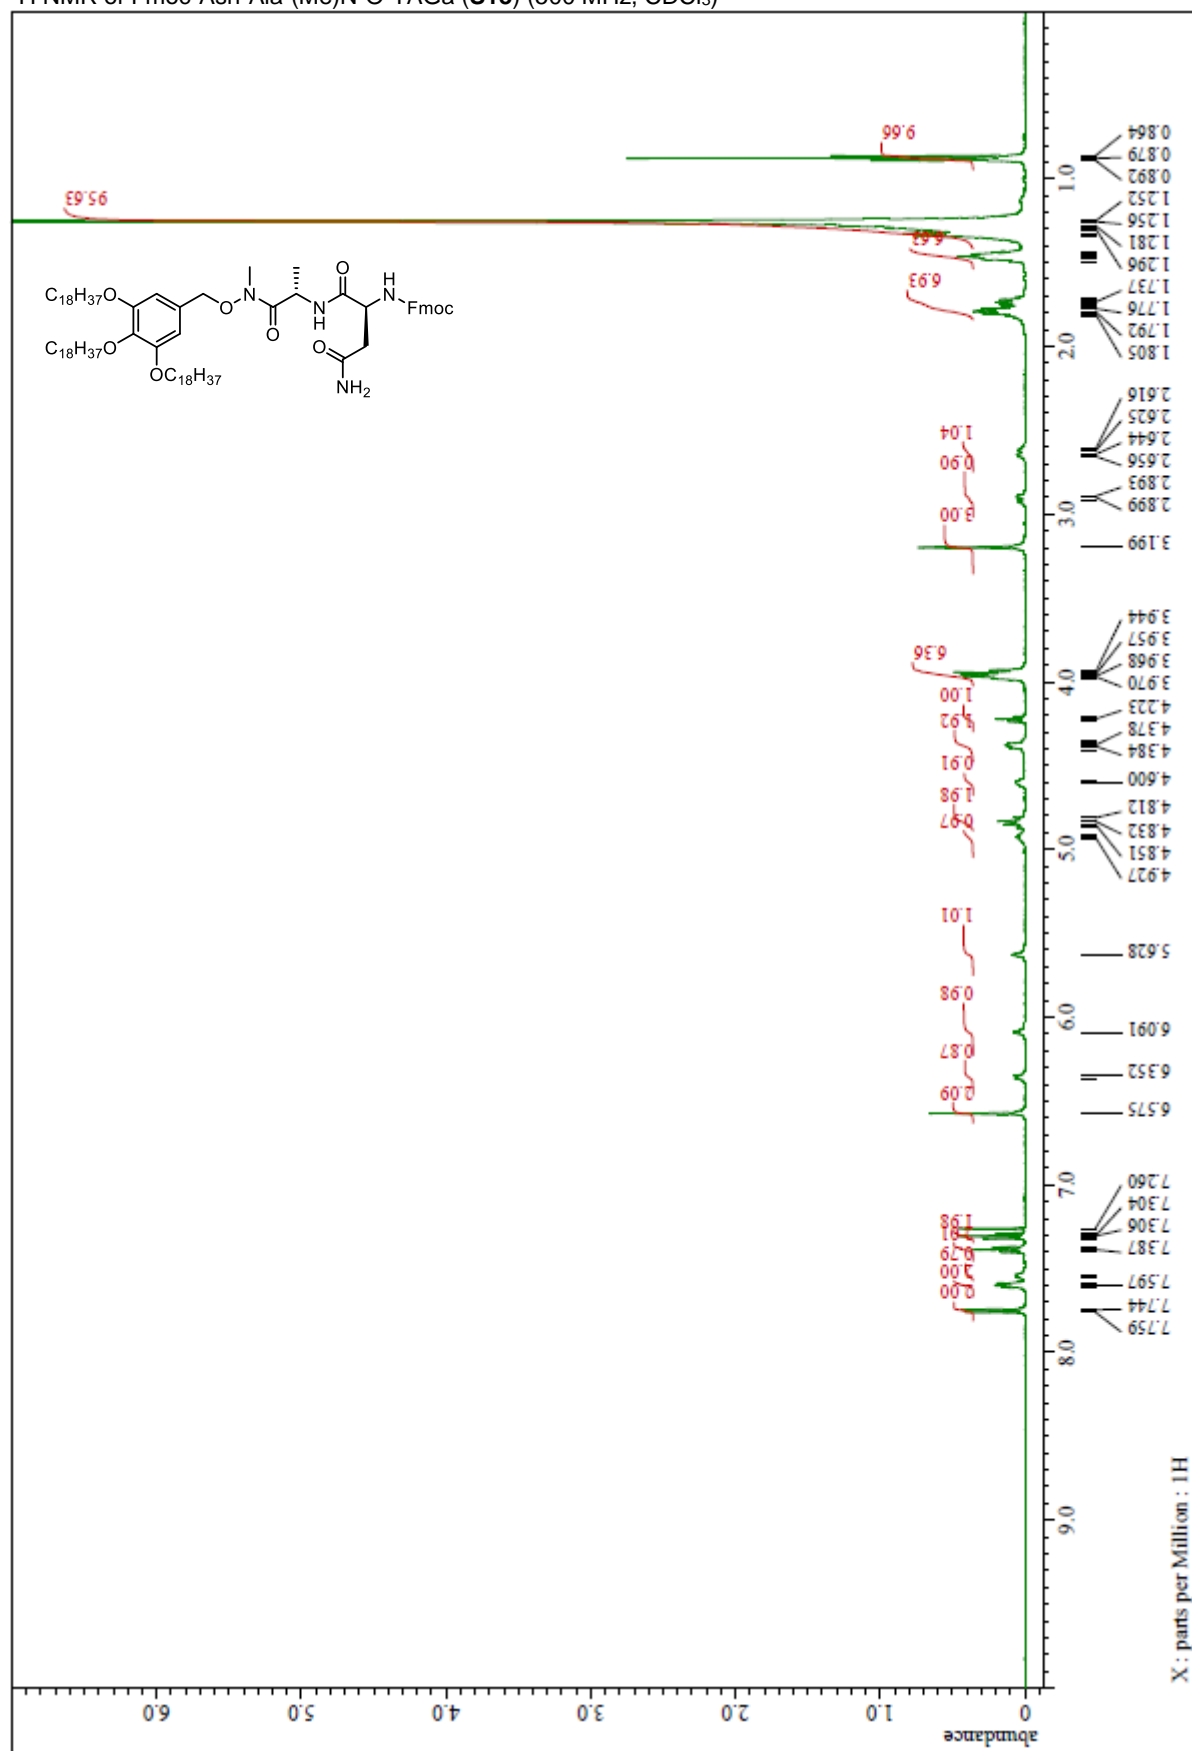

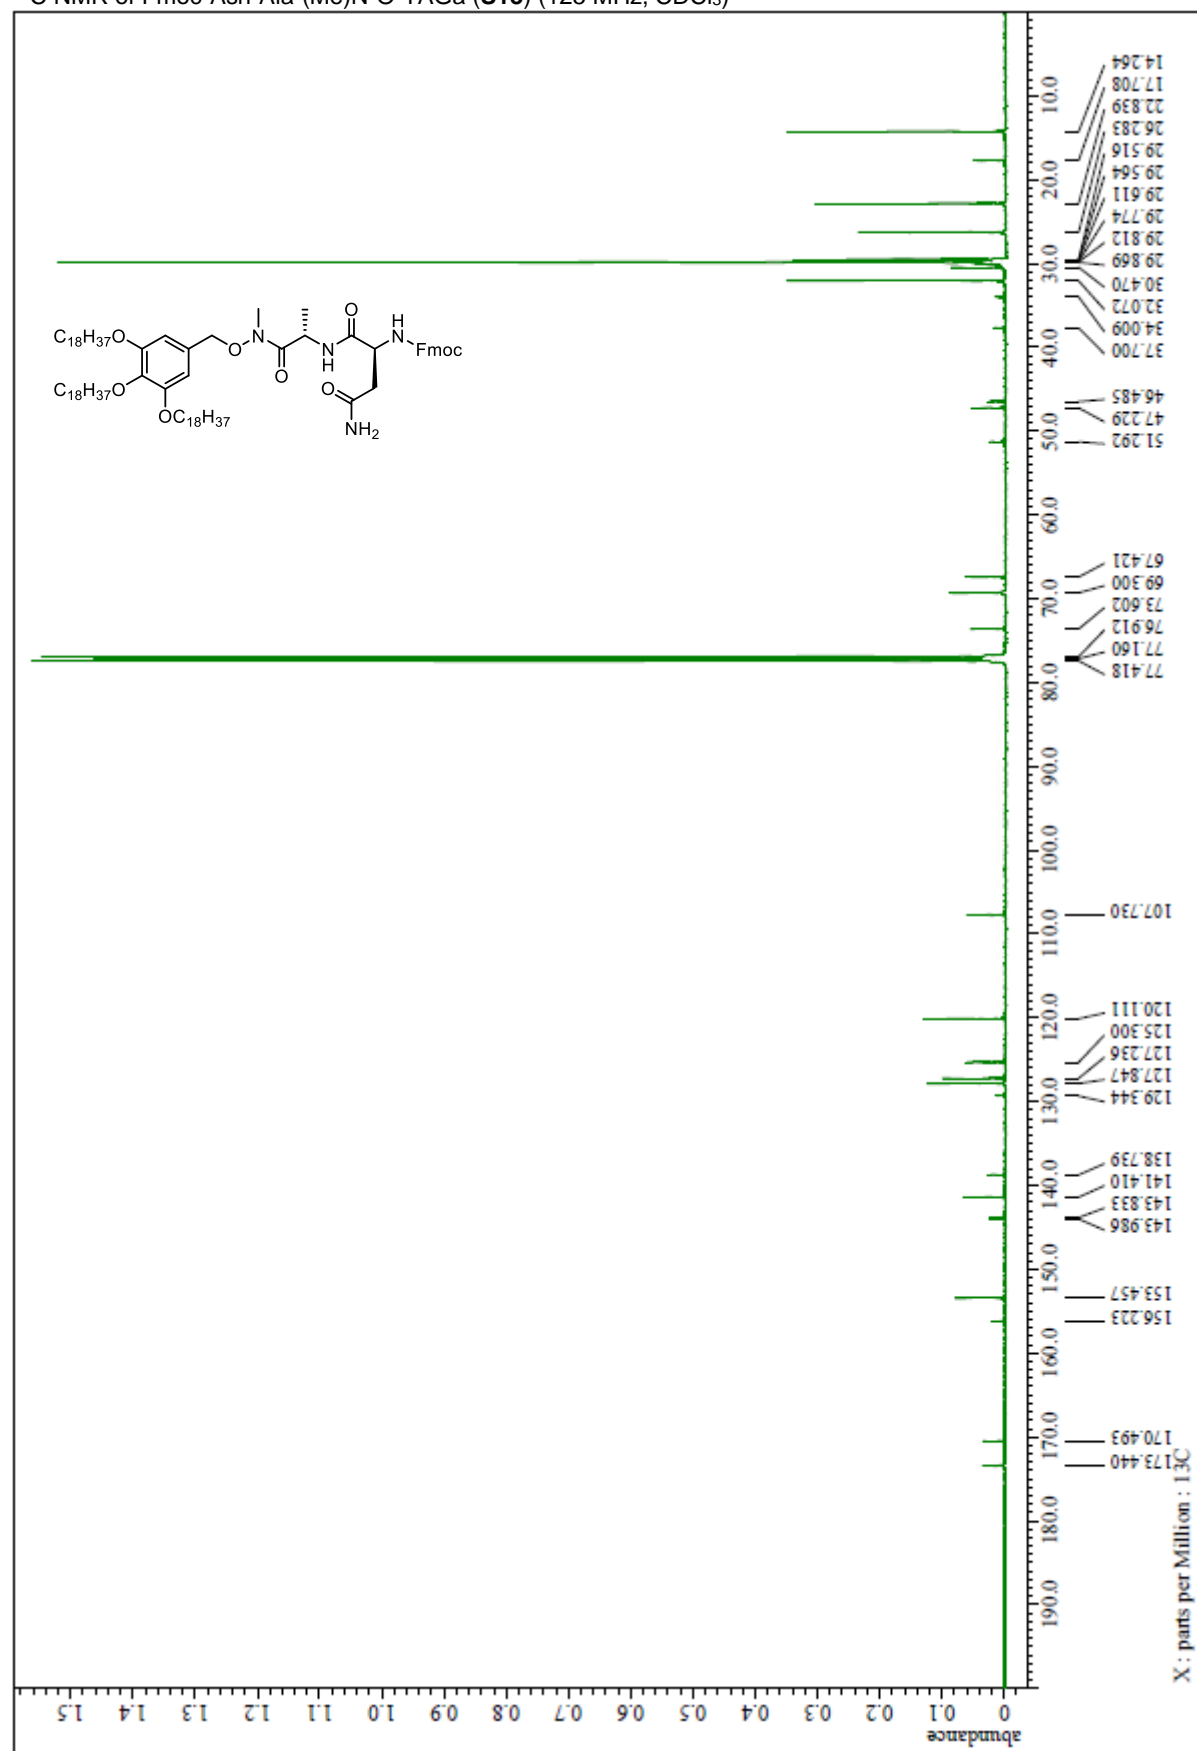

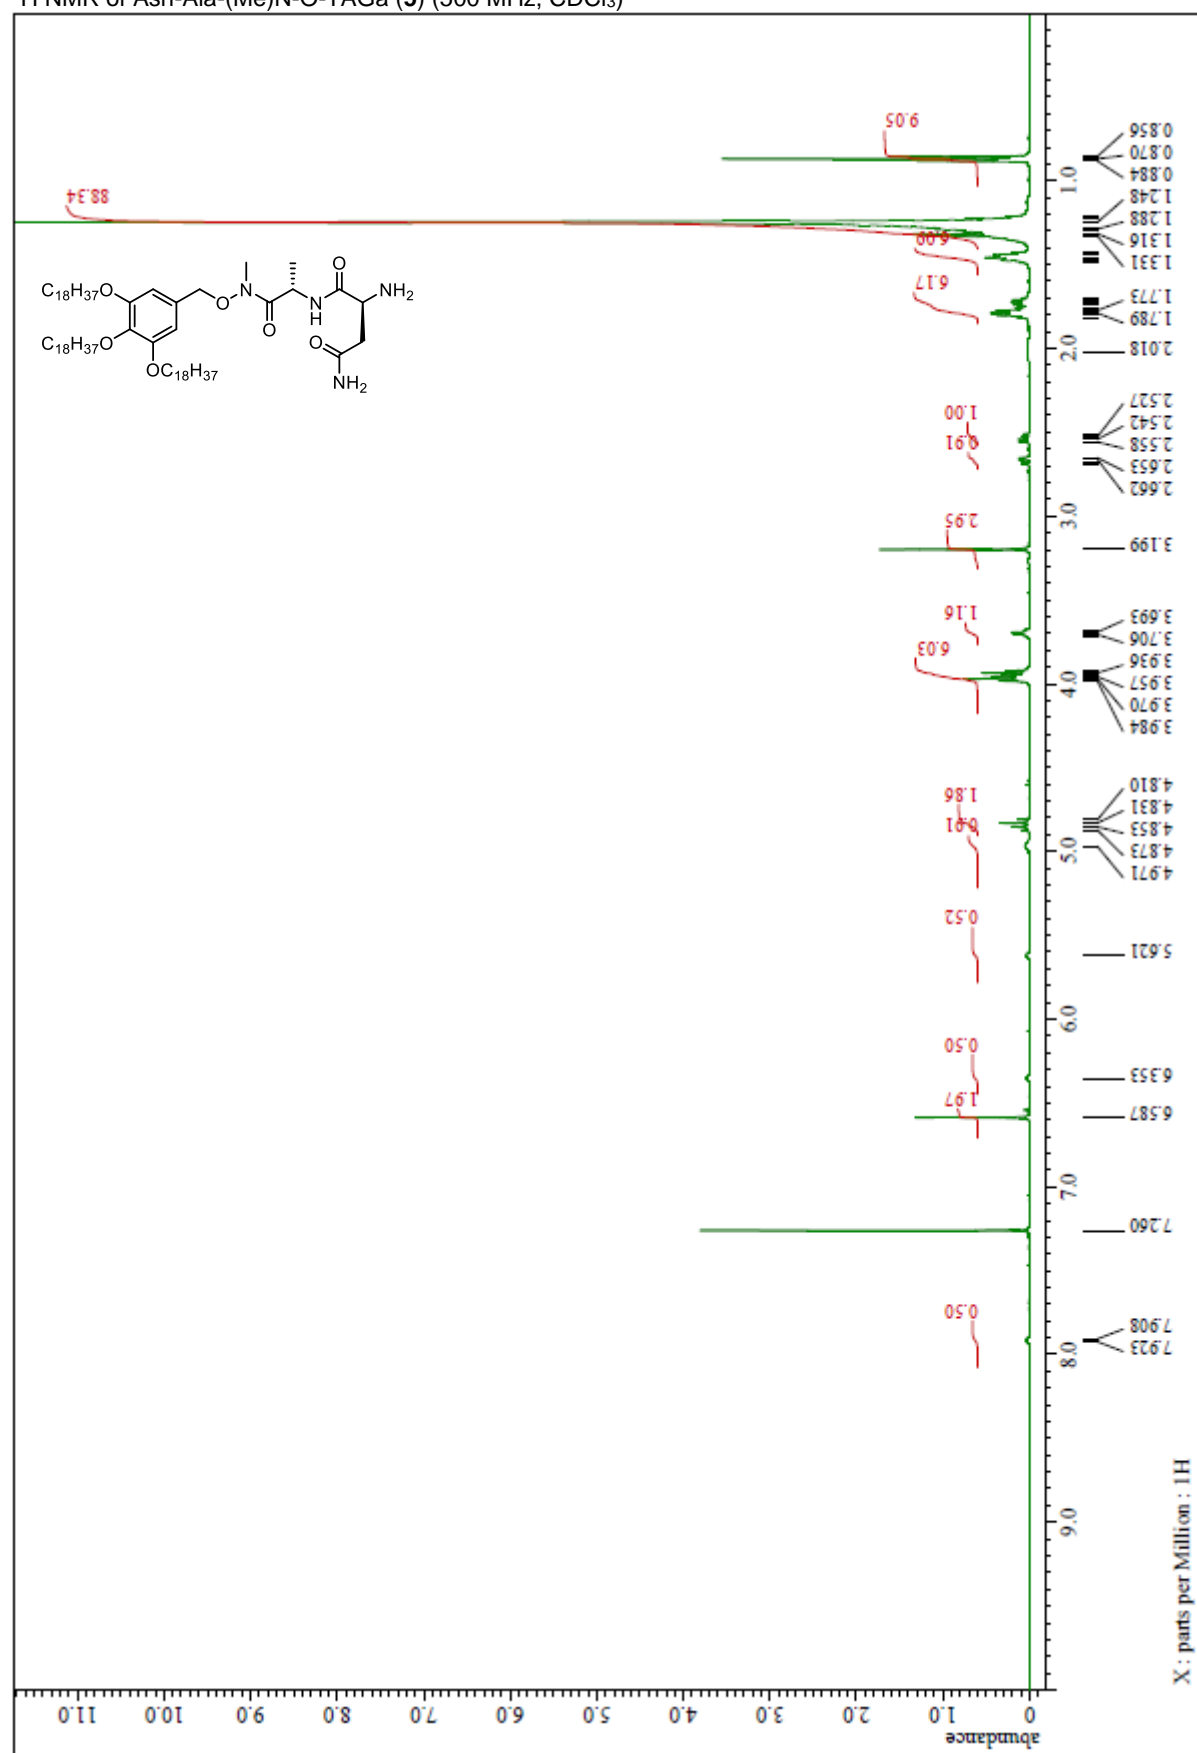

$^{13}\text{C}$  NMR of Asn-Ala-(Me)N-O-TAGa (**5**) (125 MHz,  $\text{CDCl}_3$ )

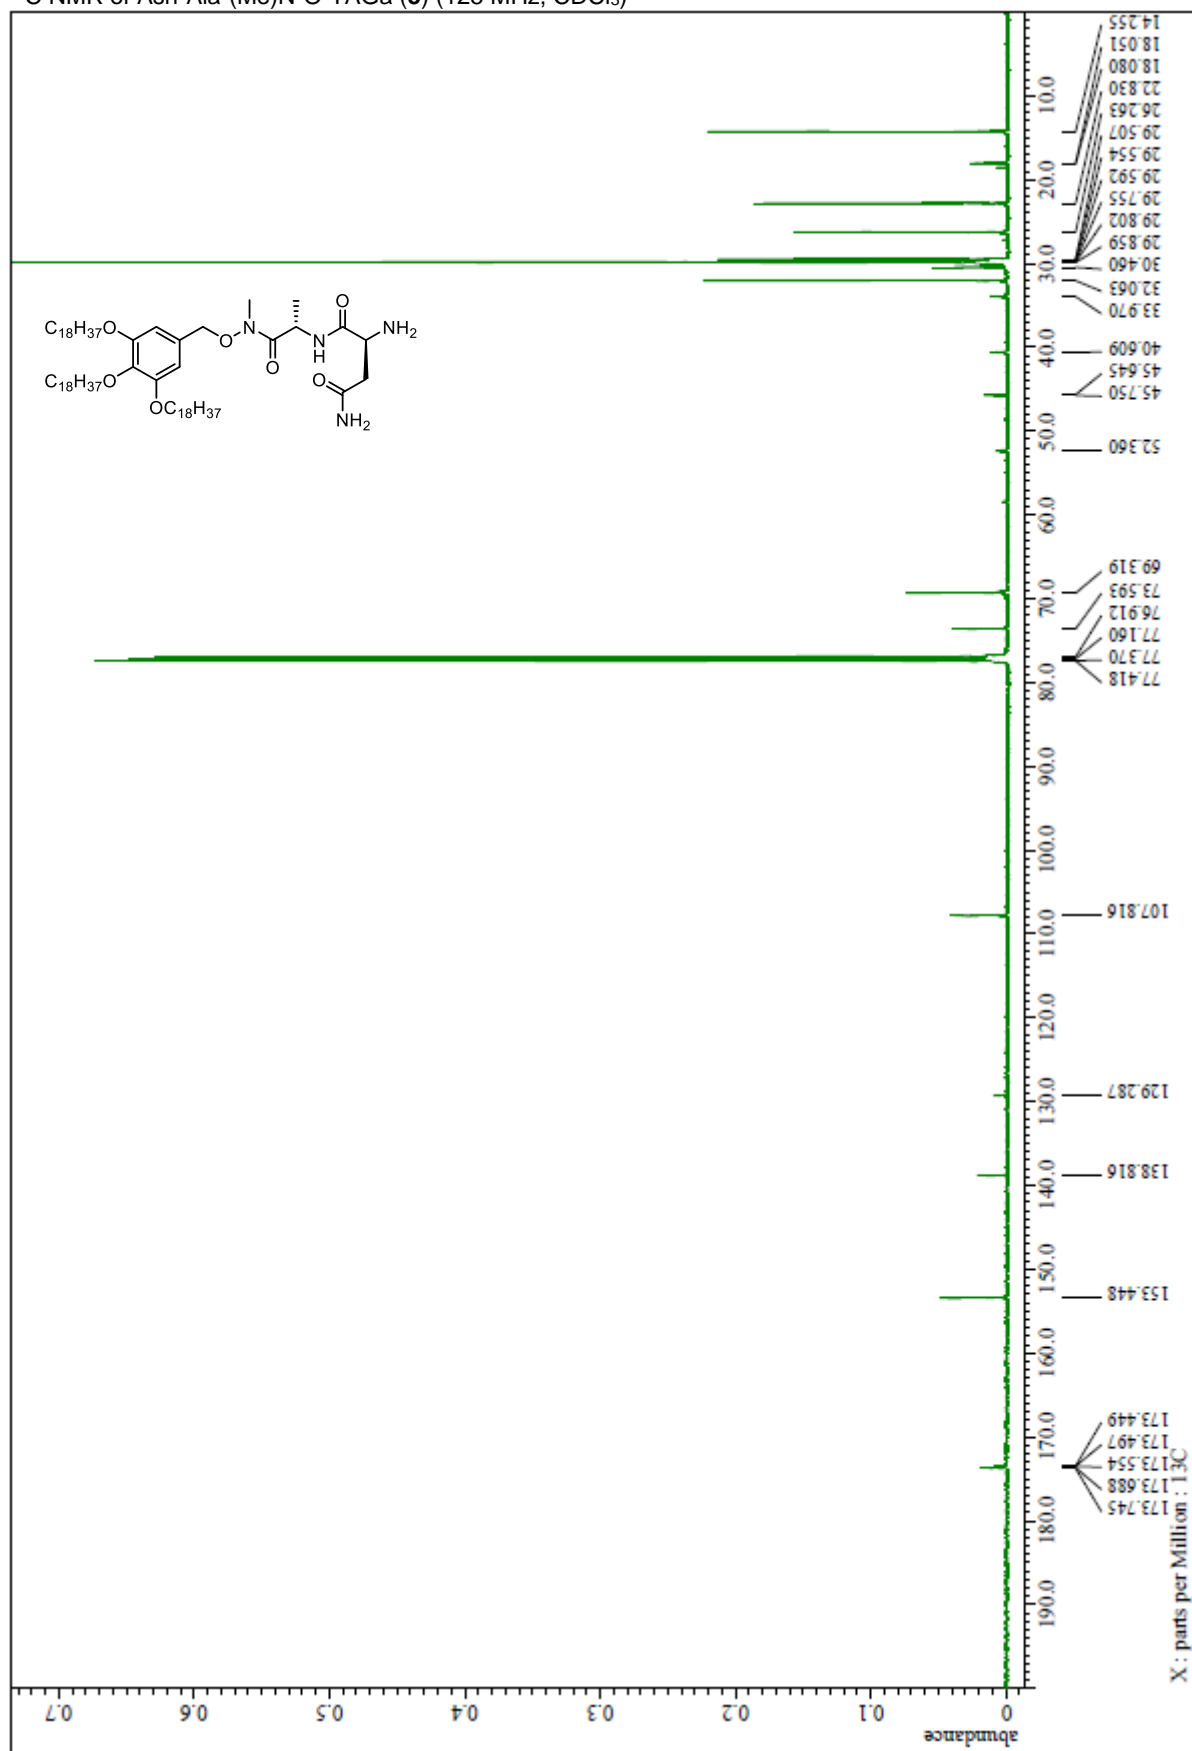



$^{13}\text{C}$  NMR of Fmoc-Val-Asn-Ala-(Me)N-O-TAGa (**S14**) (125 MHz,  $\text{CDCl}_3$ )

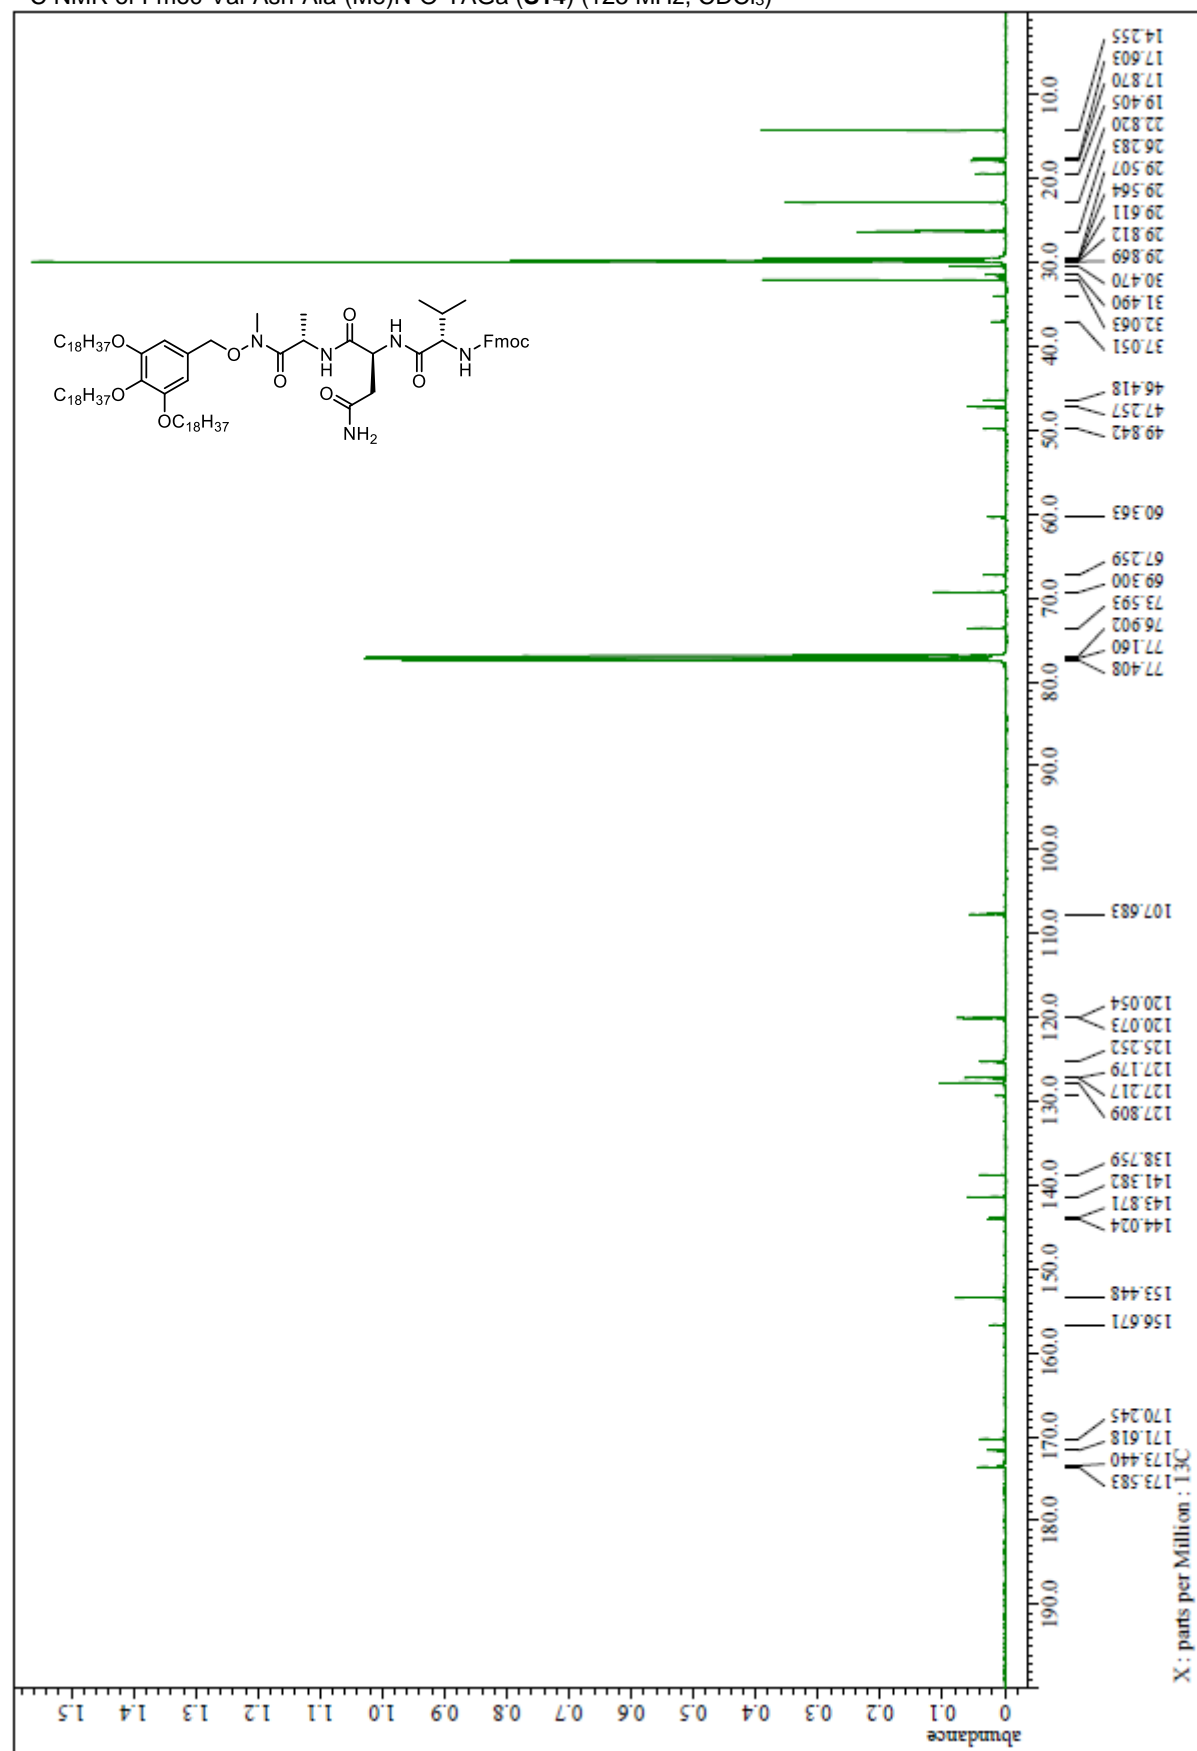



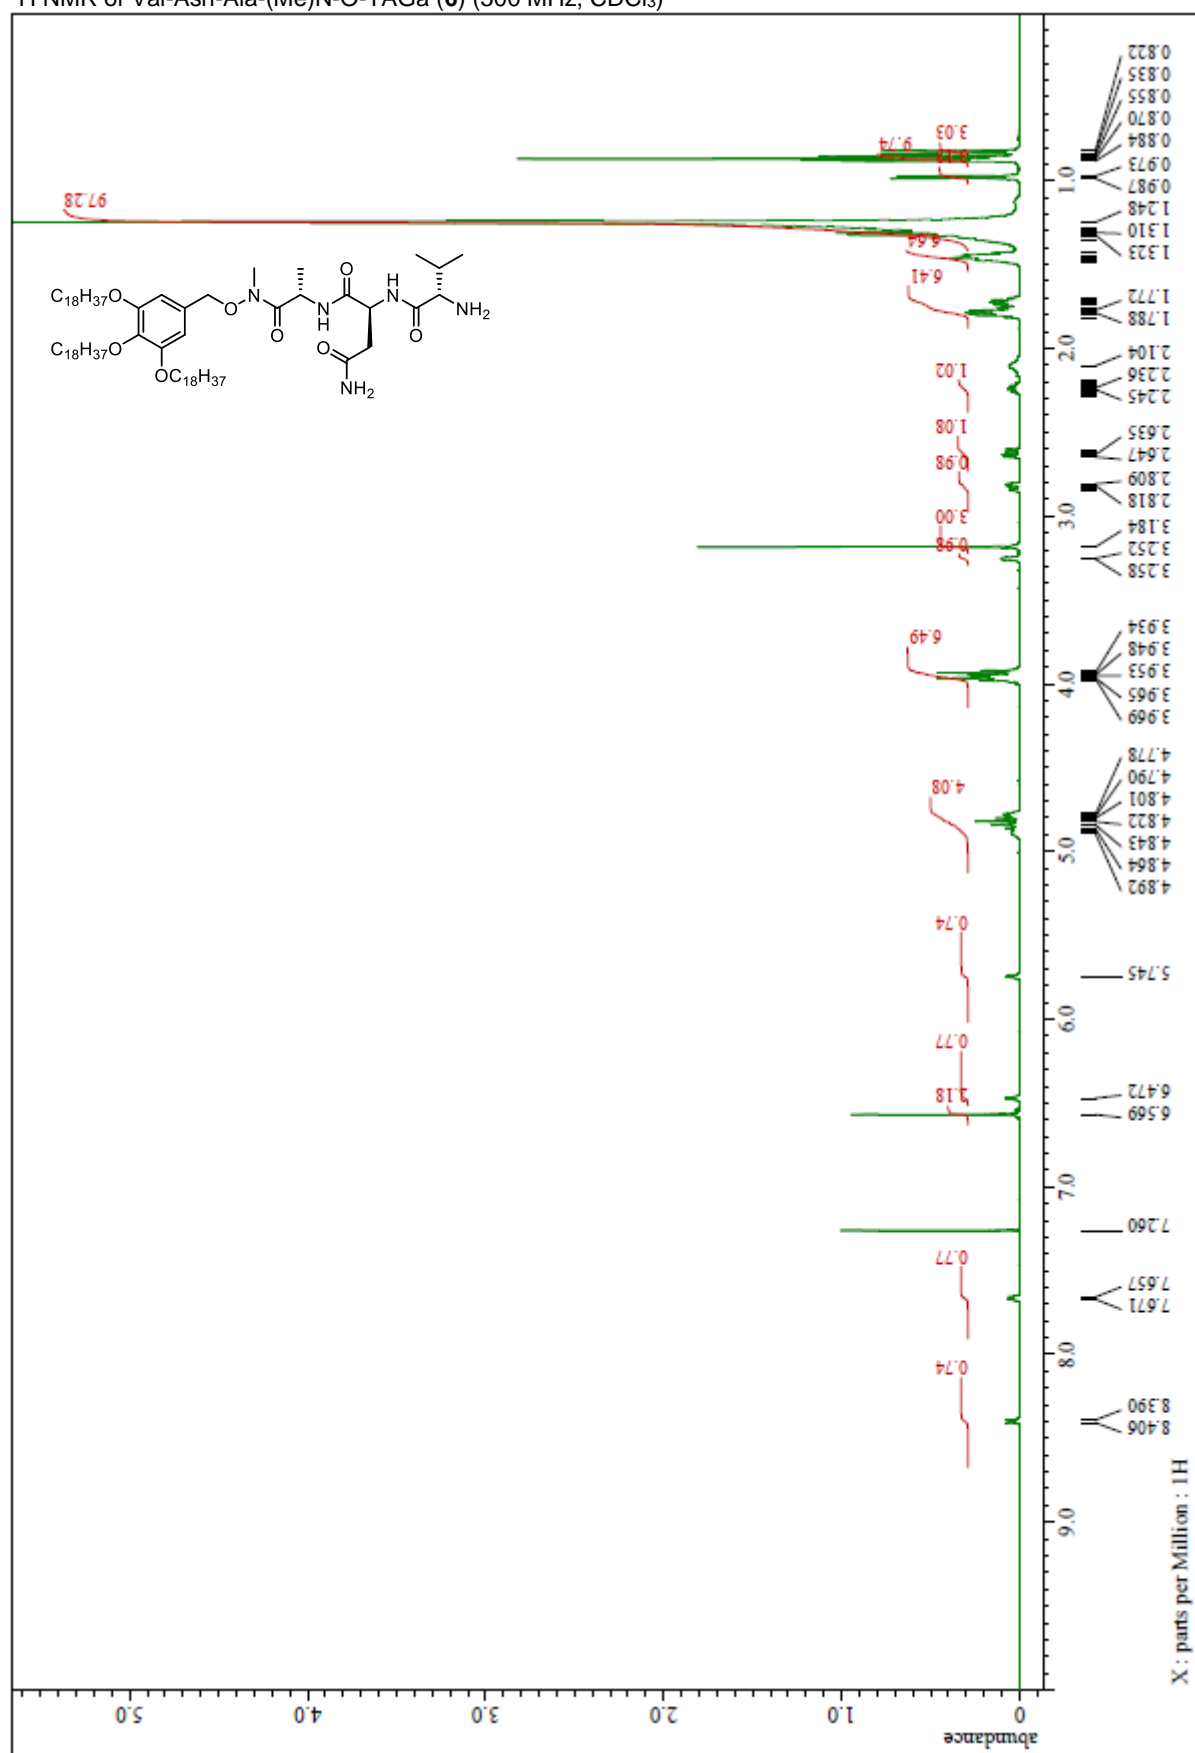

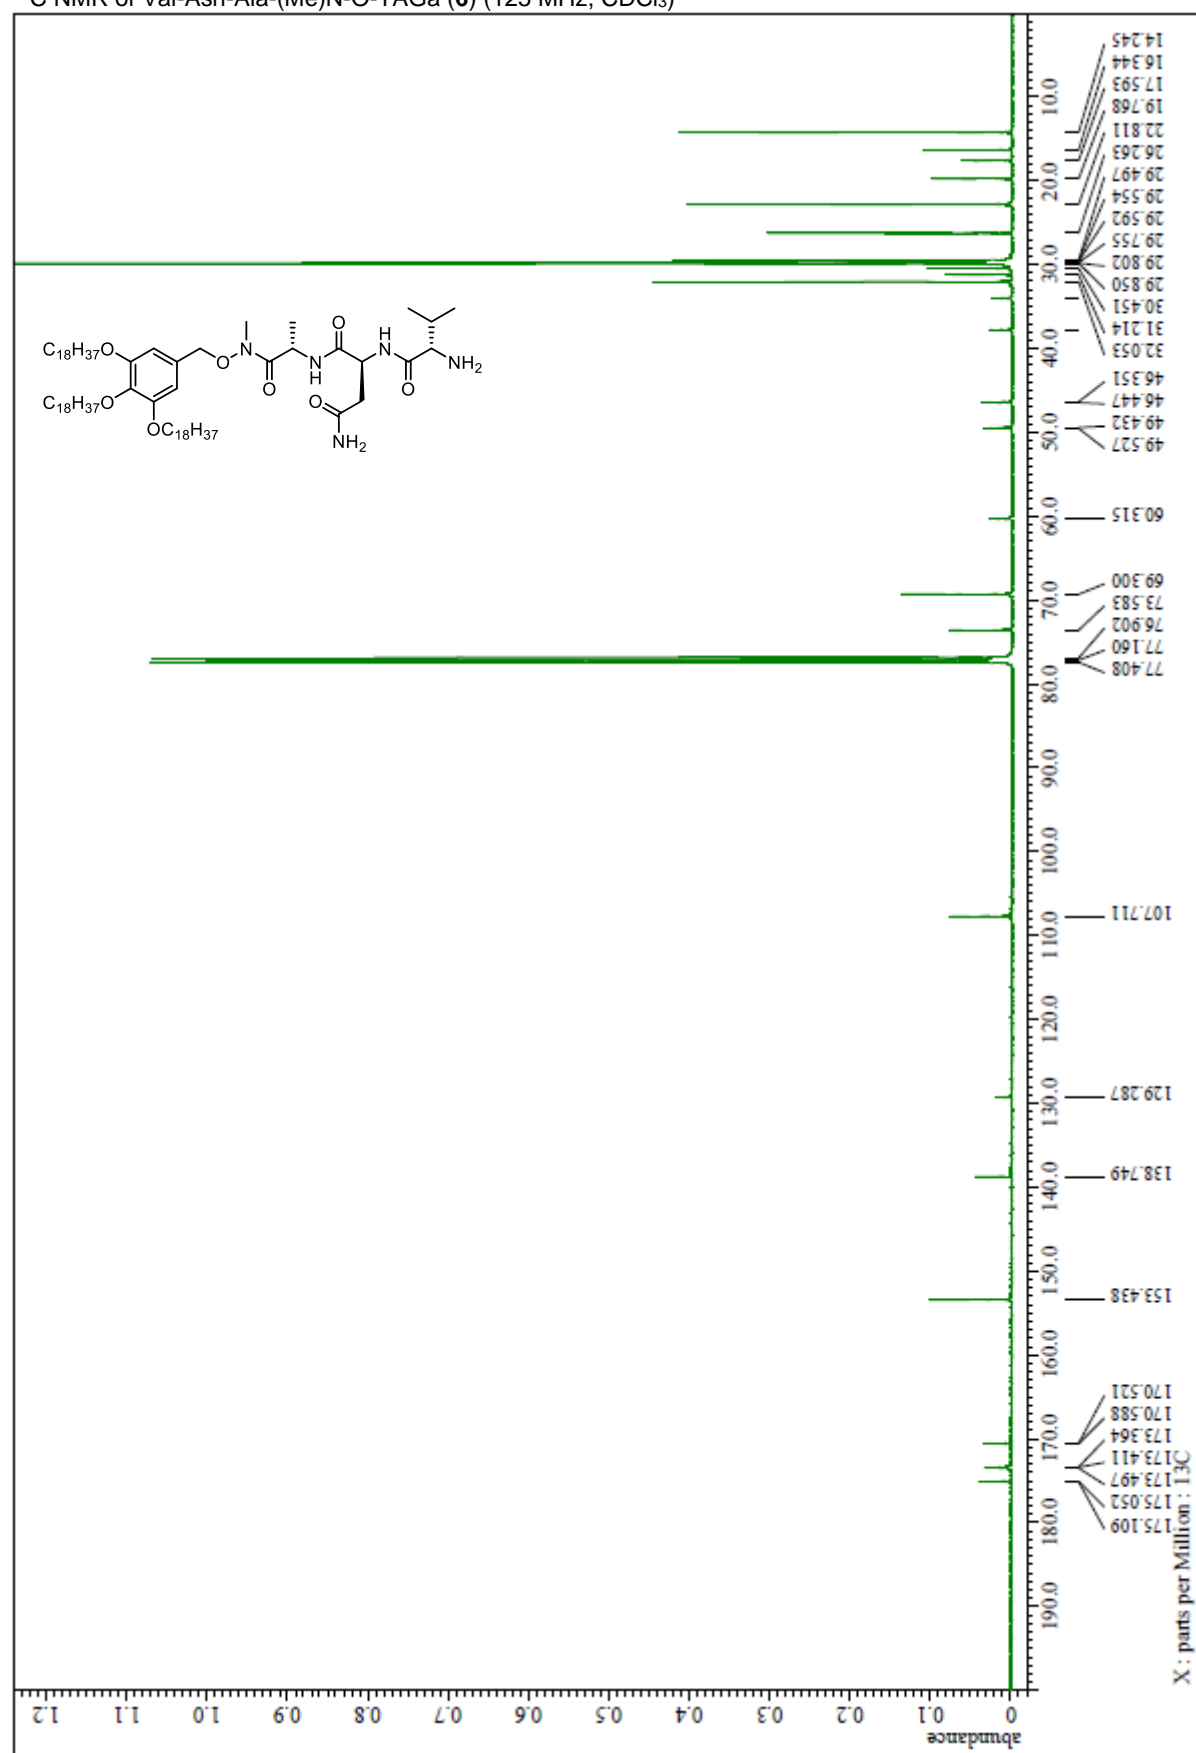



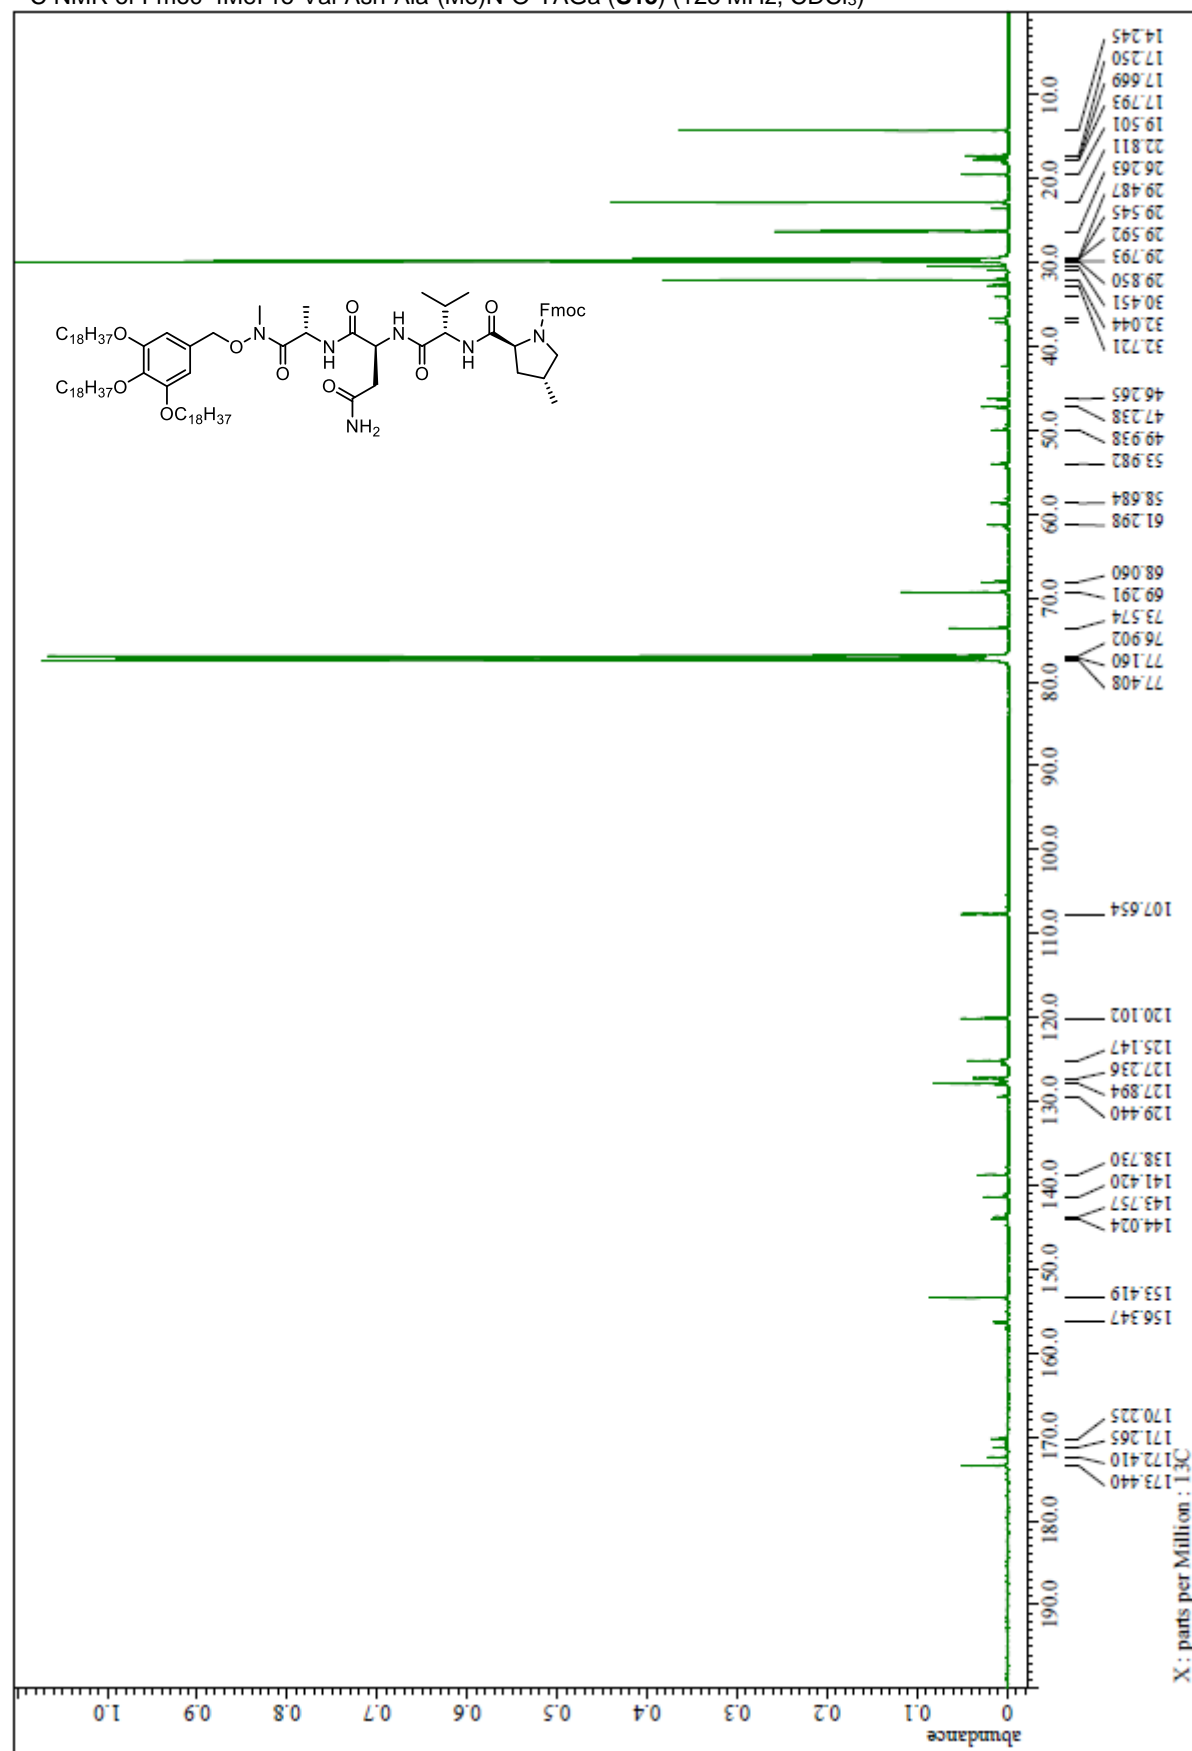

$^1\text{H}$  NMR of 4MePro-Val-Asn-Ala-(Me)N-O-TAGa (**7**) (500 MHz,  $\text{CDCl}_3$ )

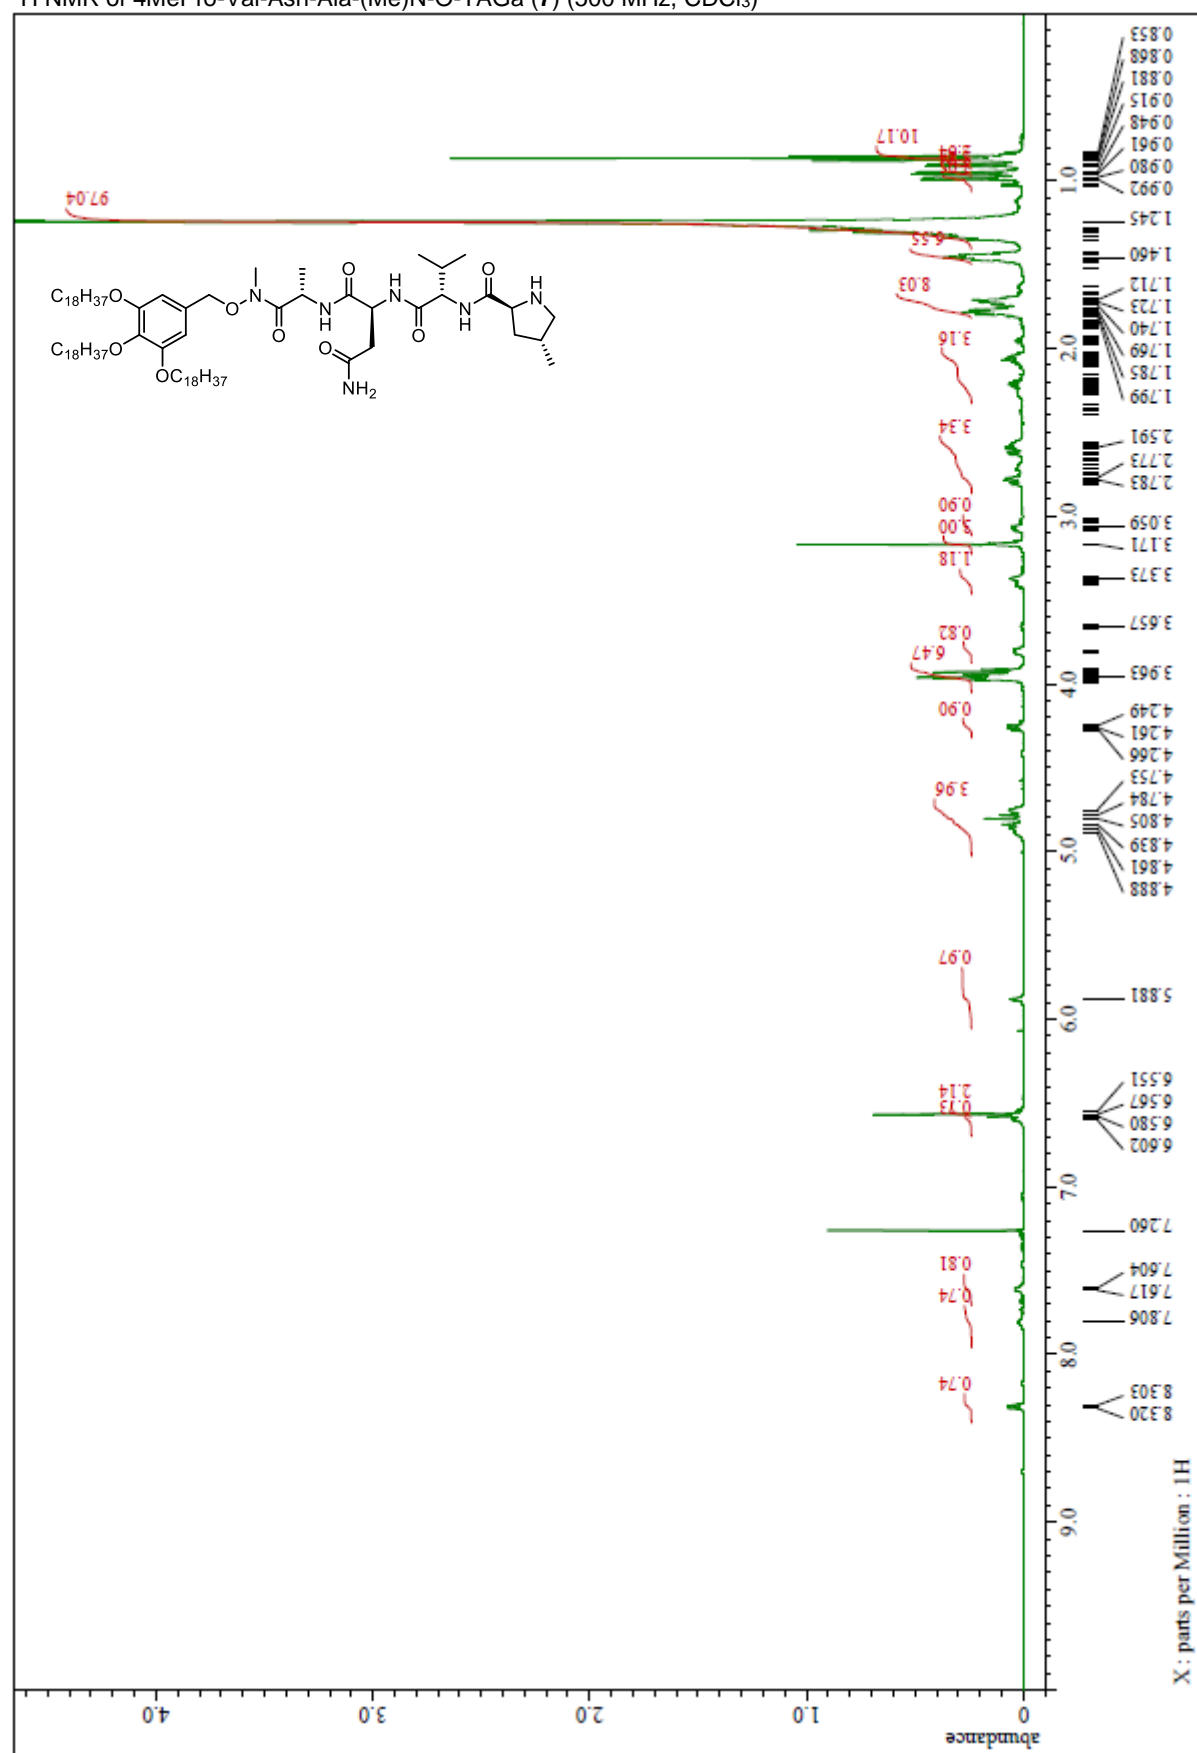

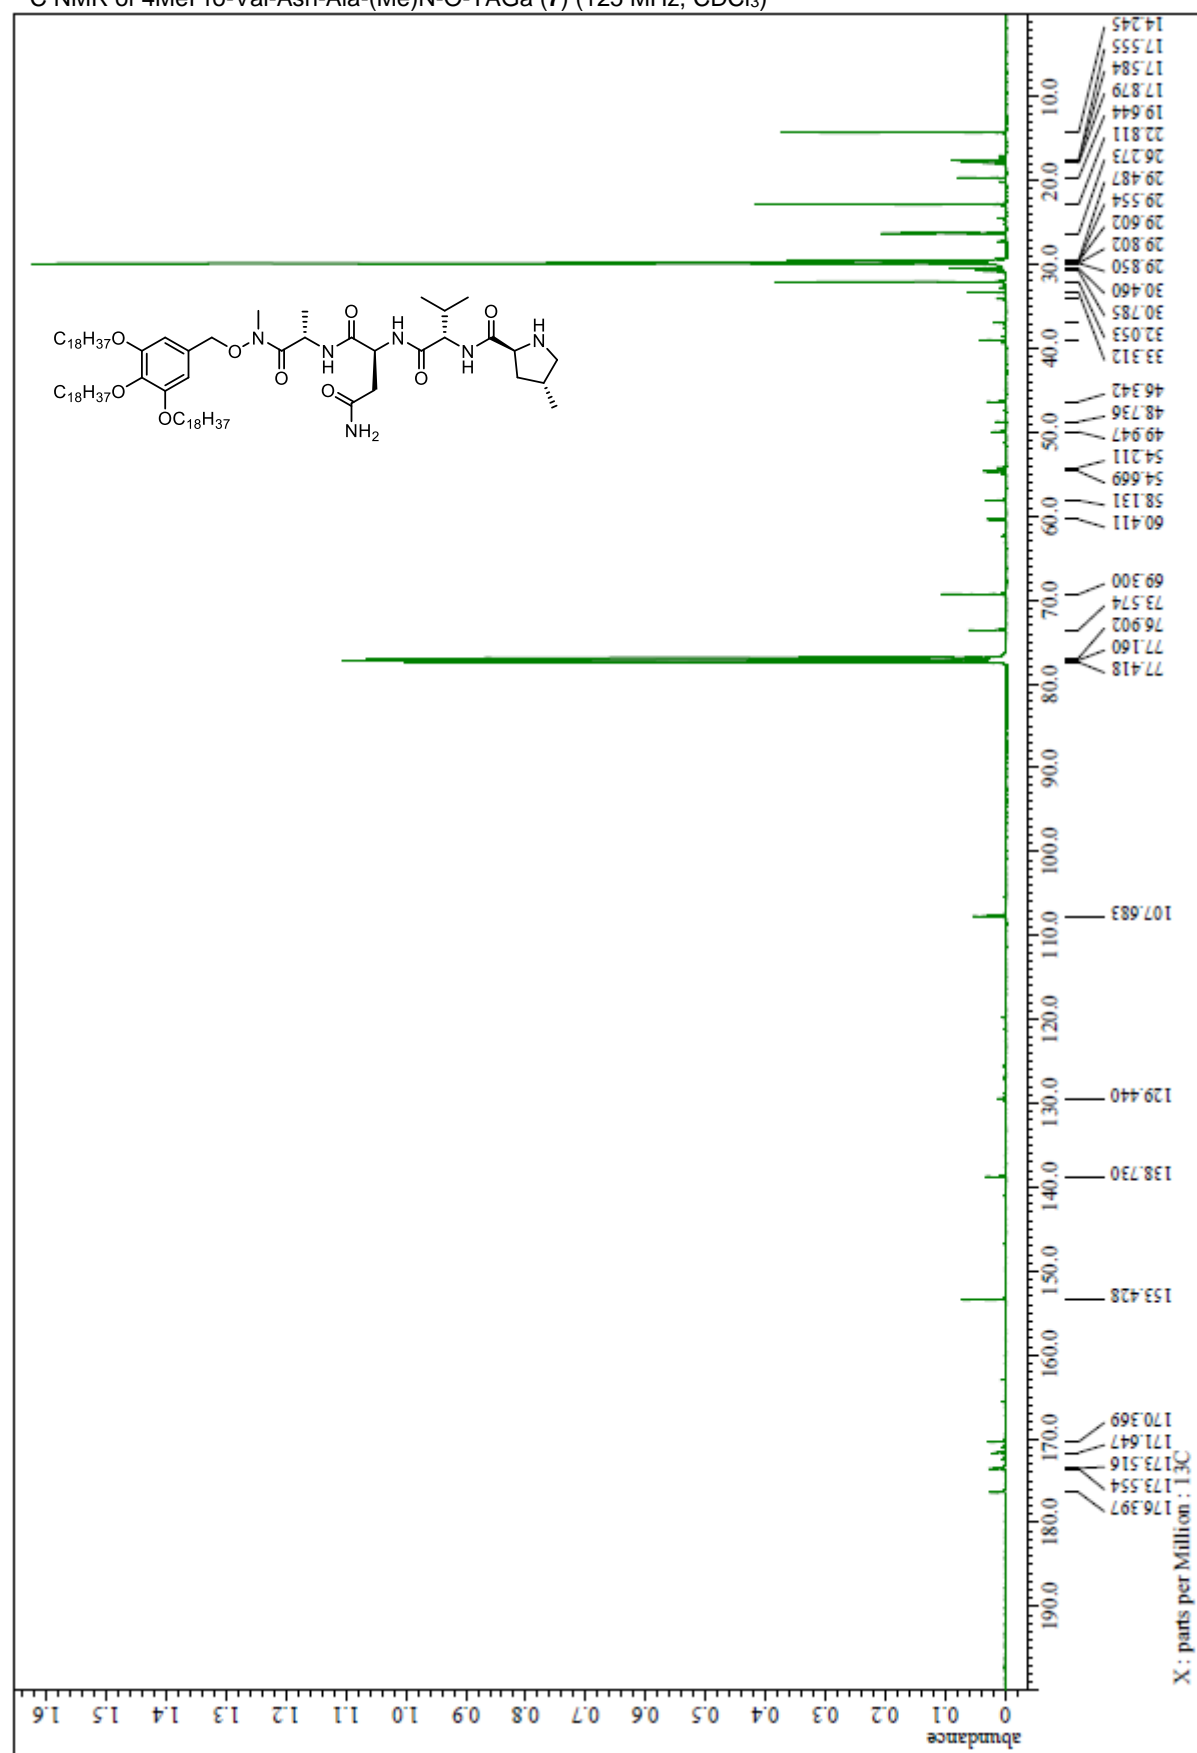

$^1\text{H}$  NMR of Fmoc-Thr-4MePro-Val-Asn-Ala-(Me)N-O-TAGa (**S16**) (500 MHz,  $\text{CDCl}_3$ )

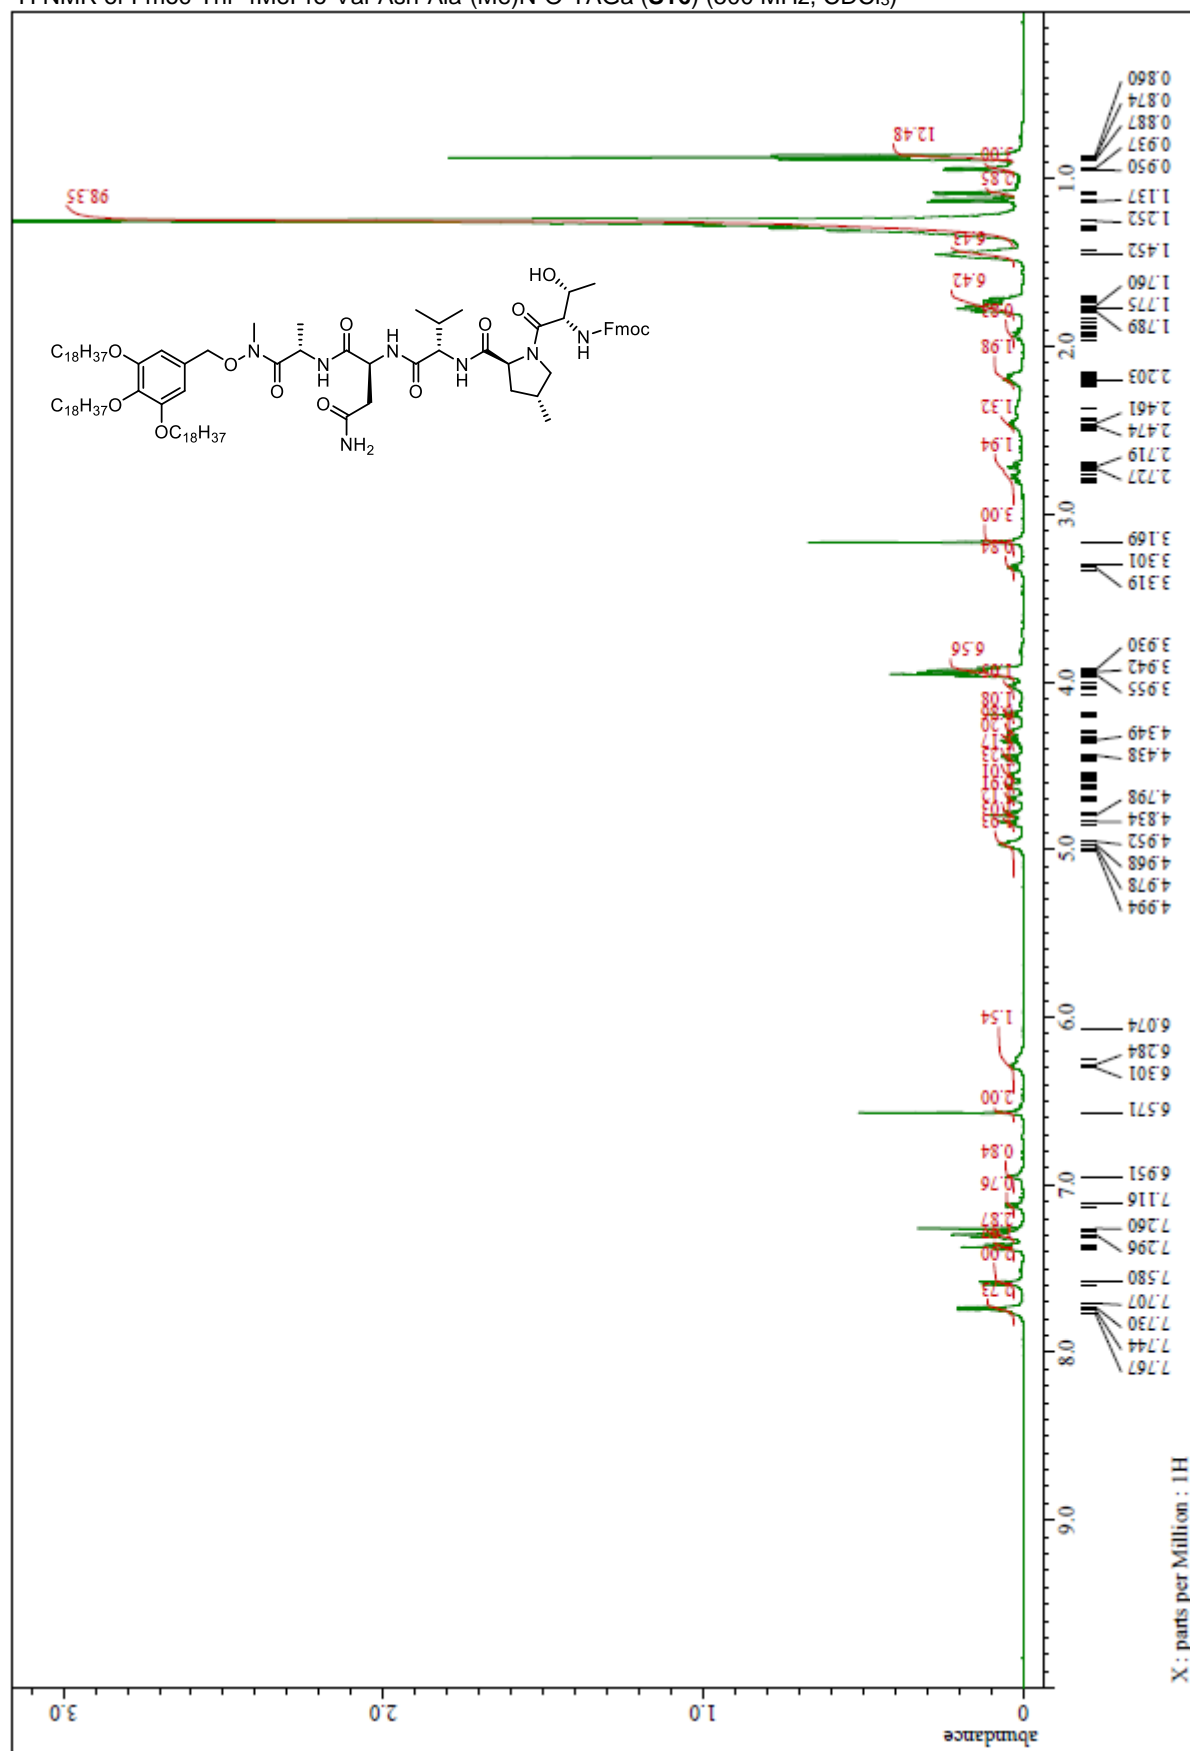

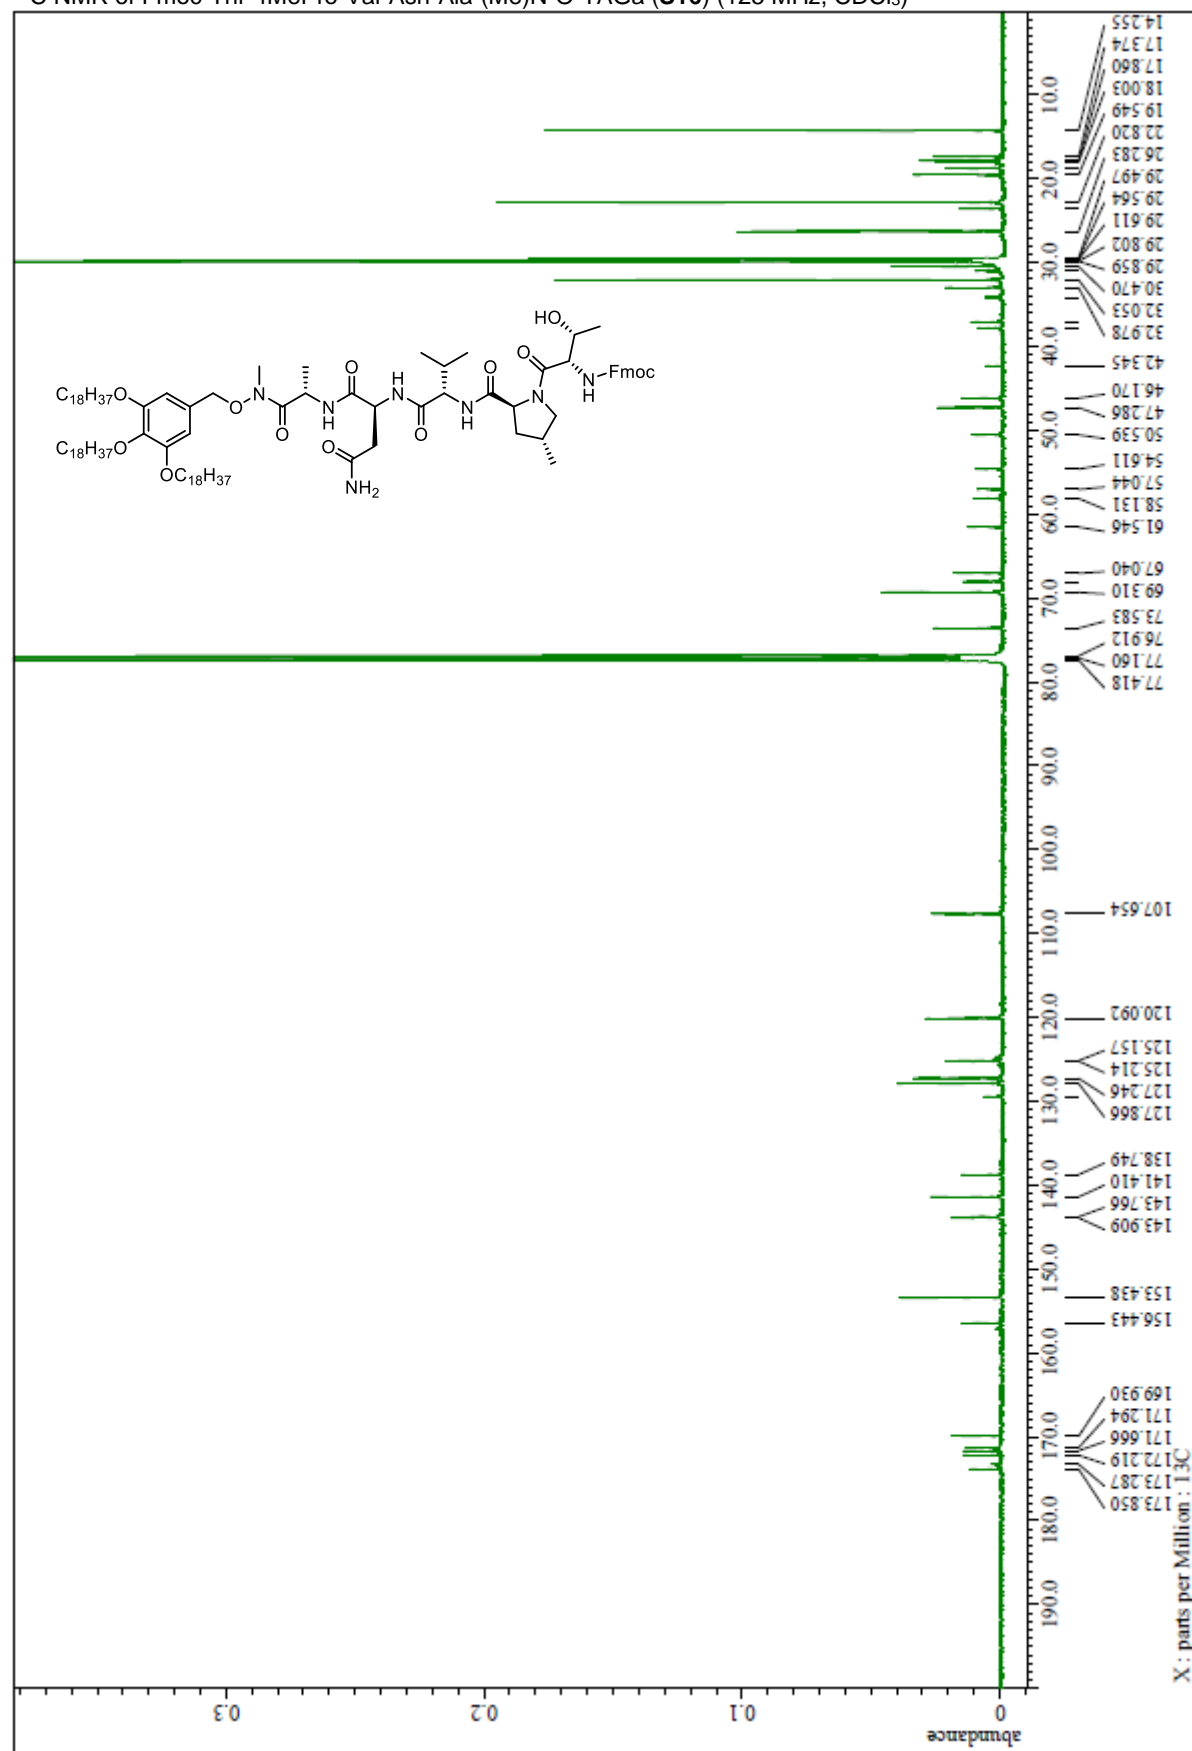



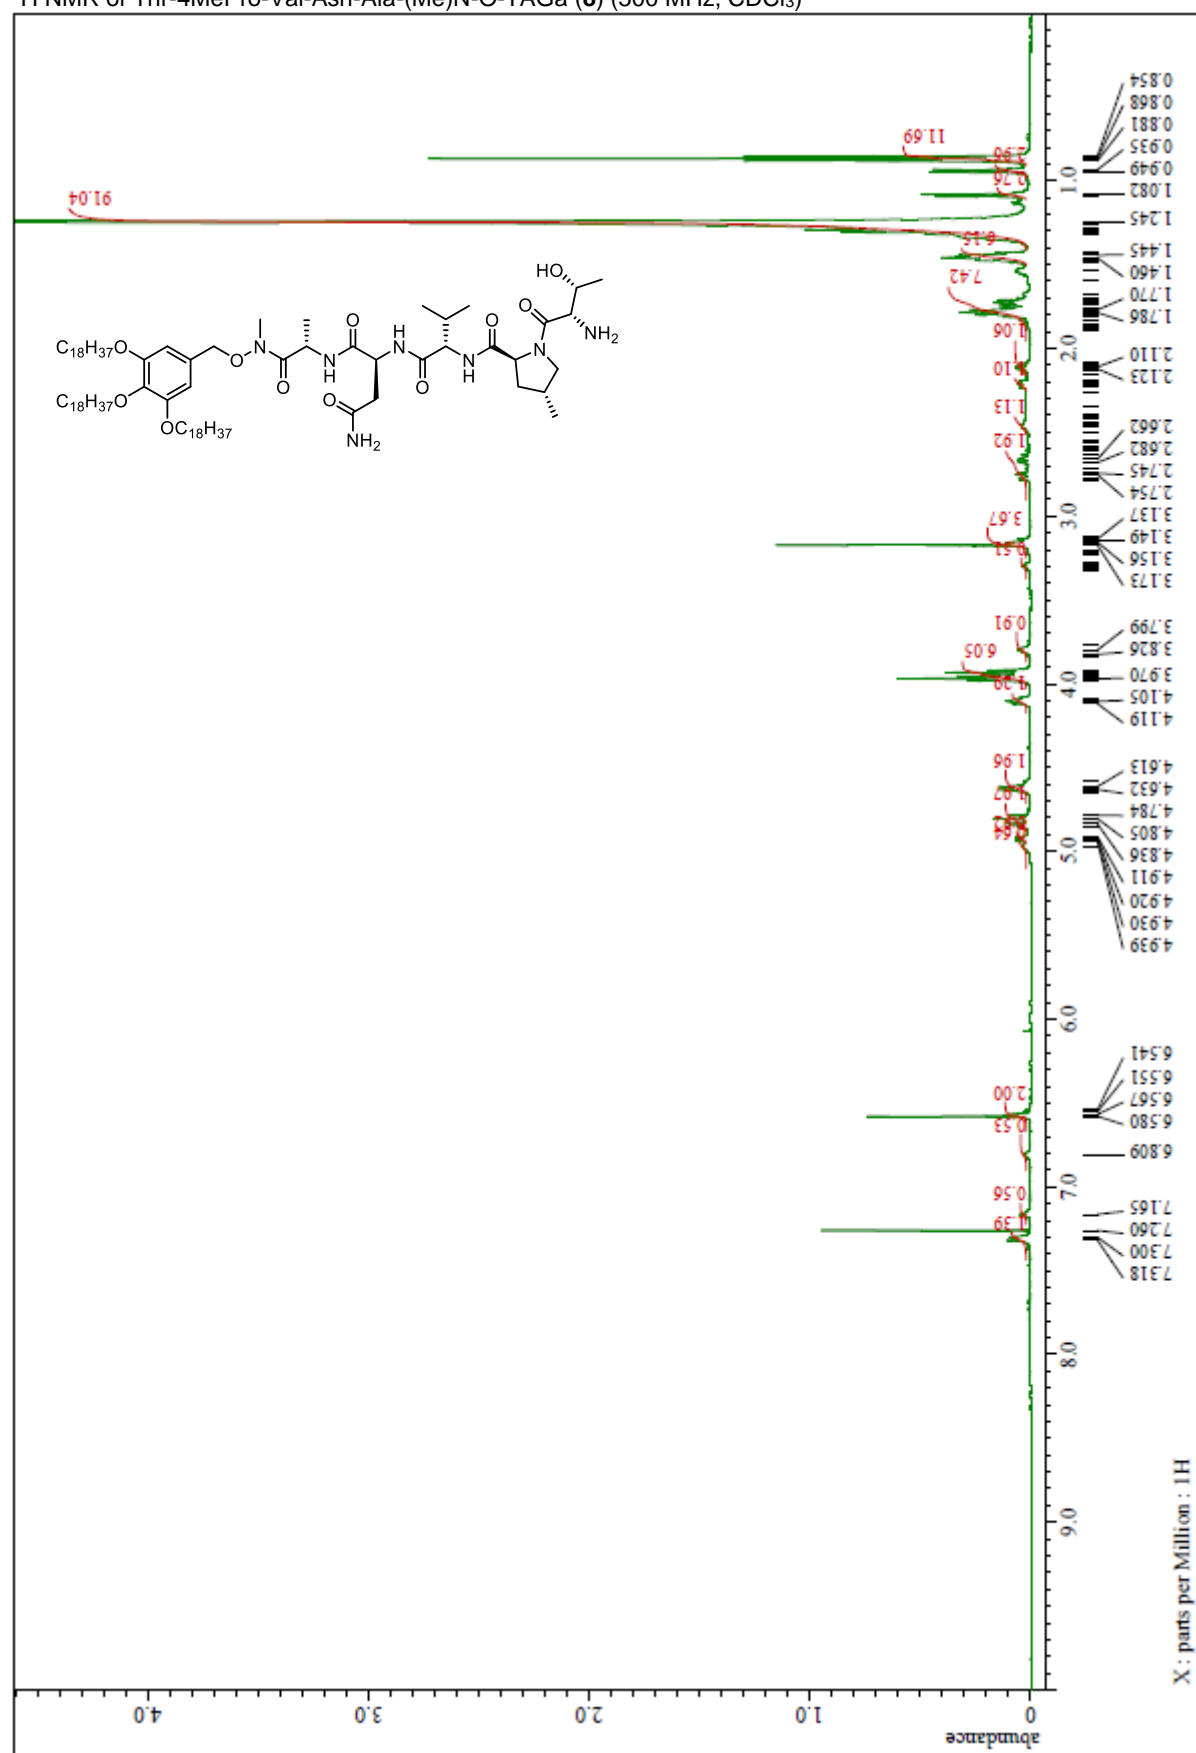

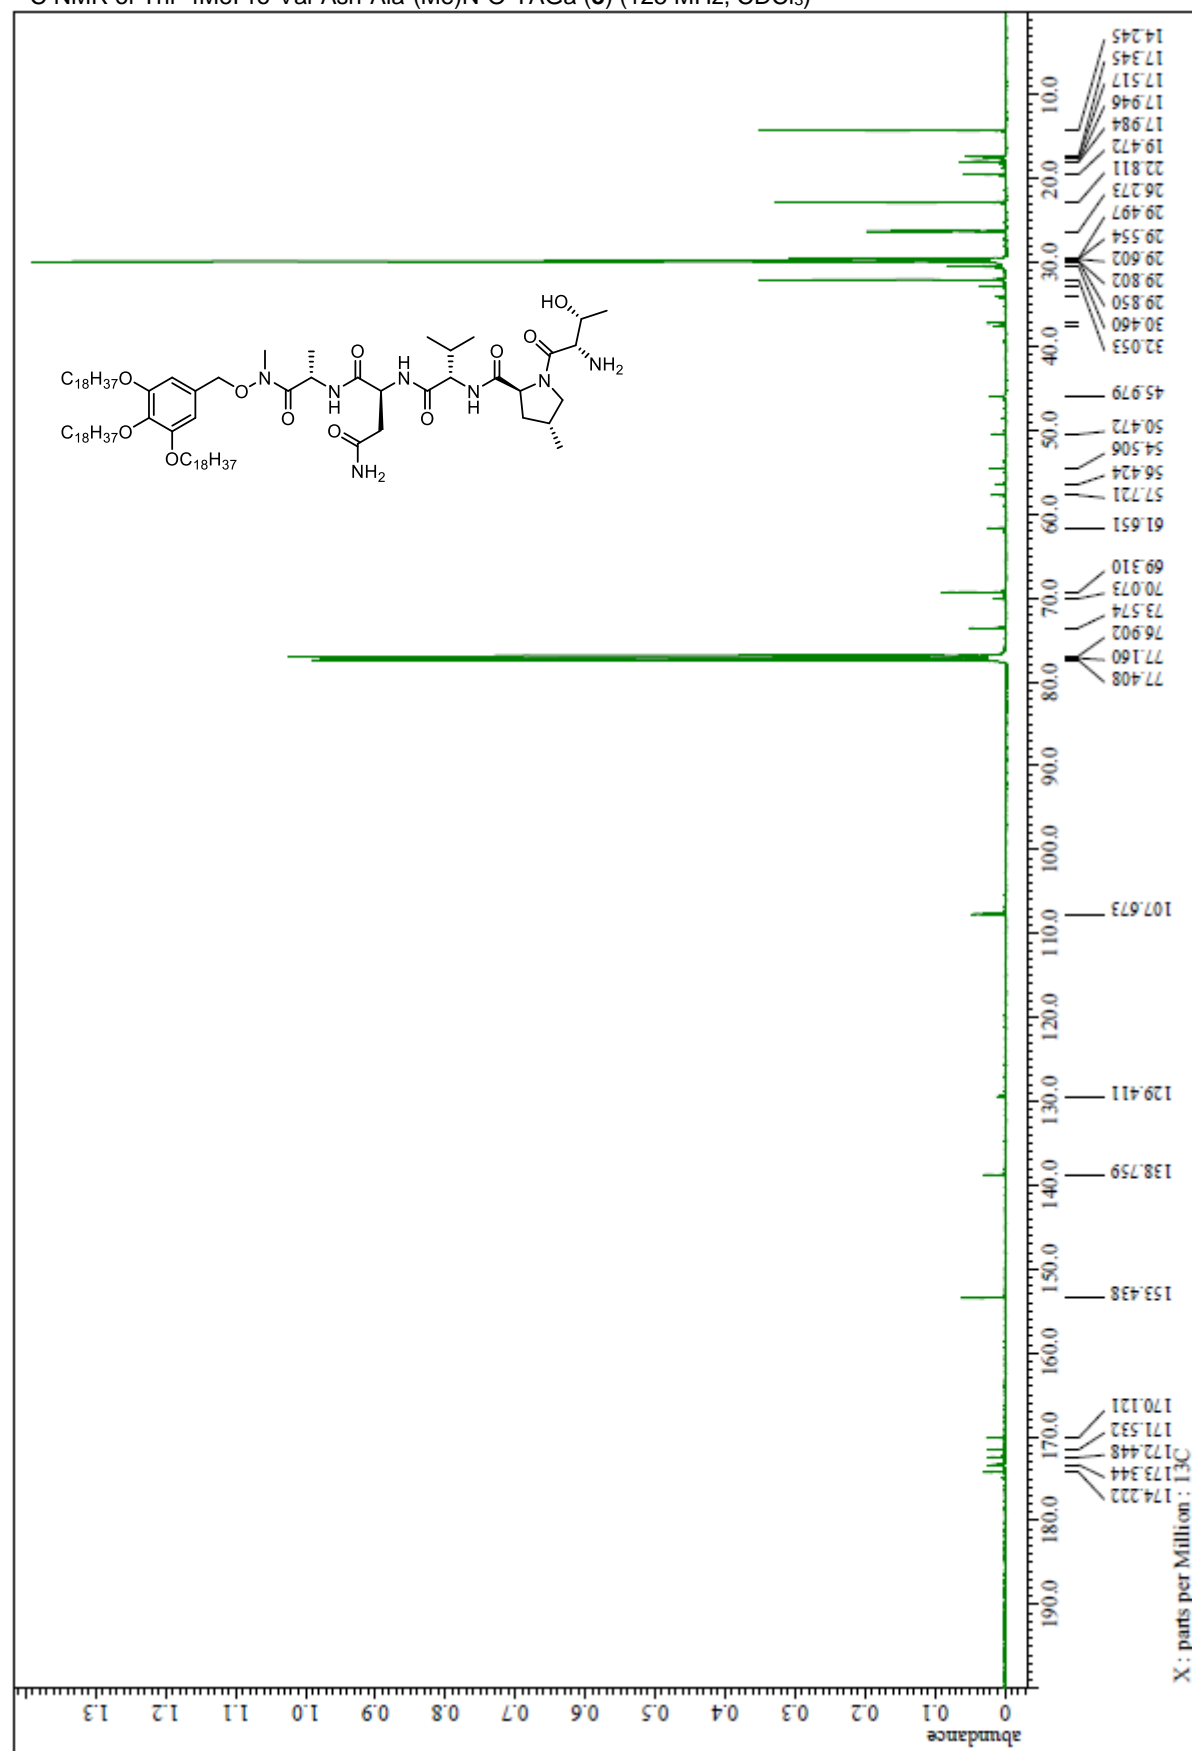

<sup>1</sup>H NMR of Oleic acid-Thr-4MePro-Val-Asn-Ala-(Me)N-O-TAGa (**9**) (500 MHz, CDCl<sub>3</sub>)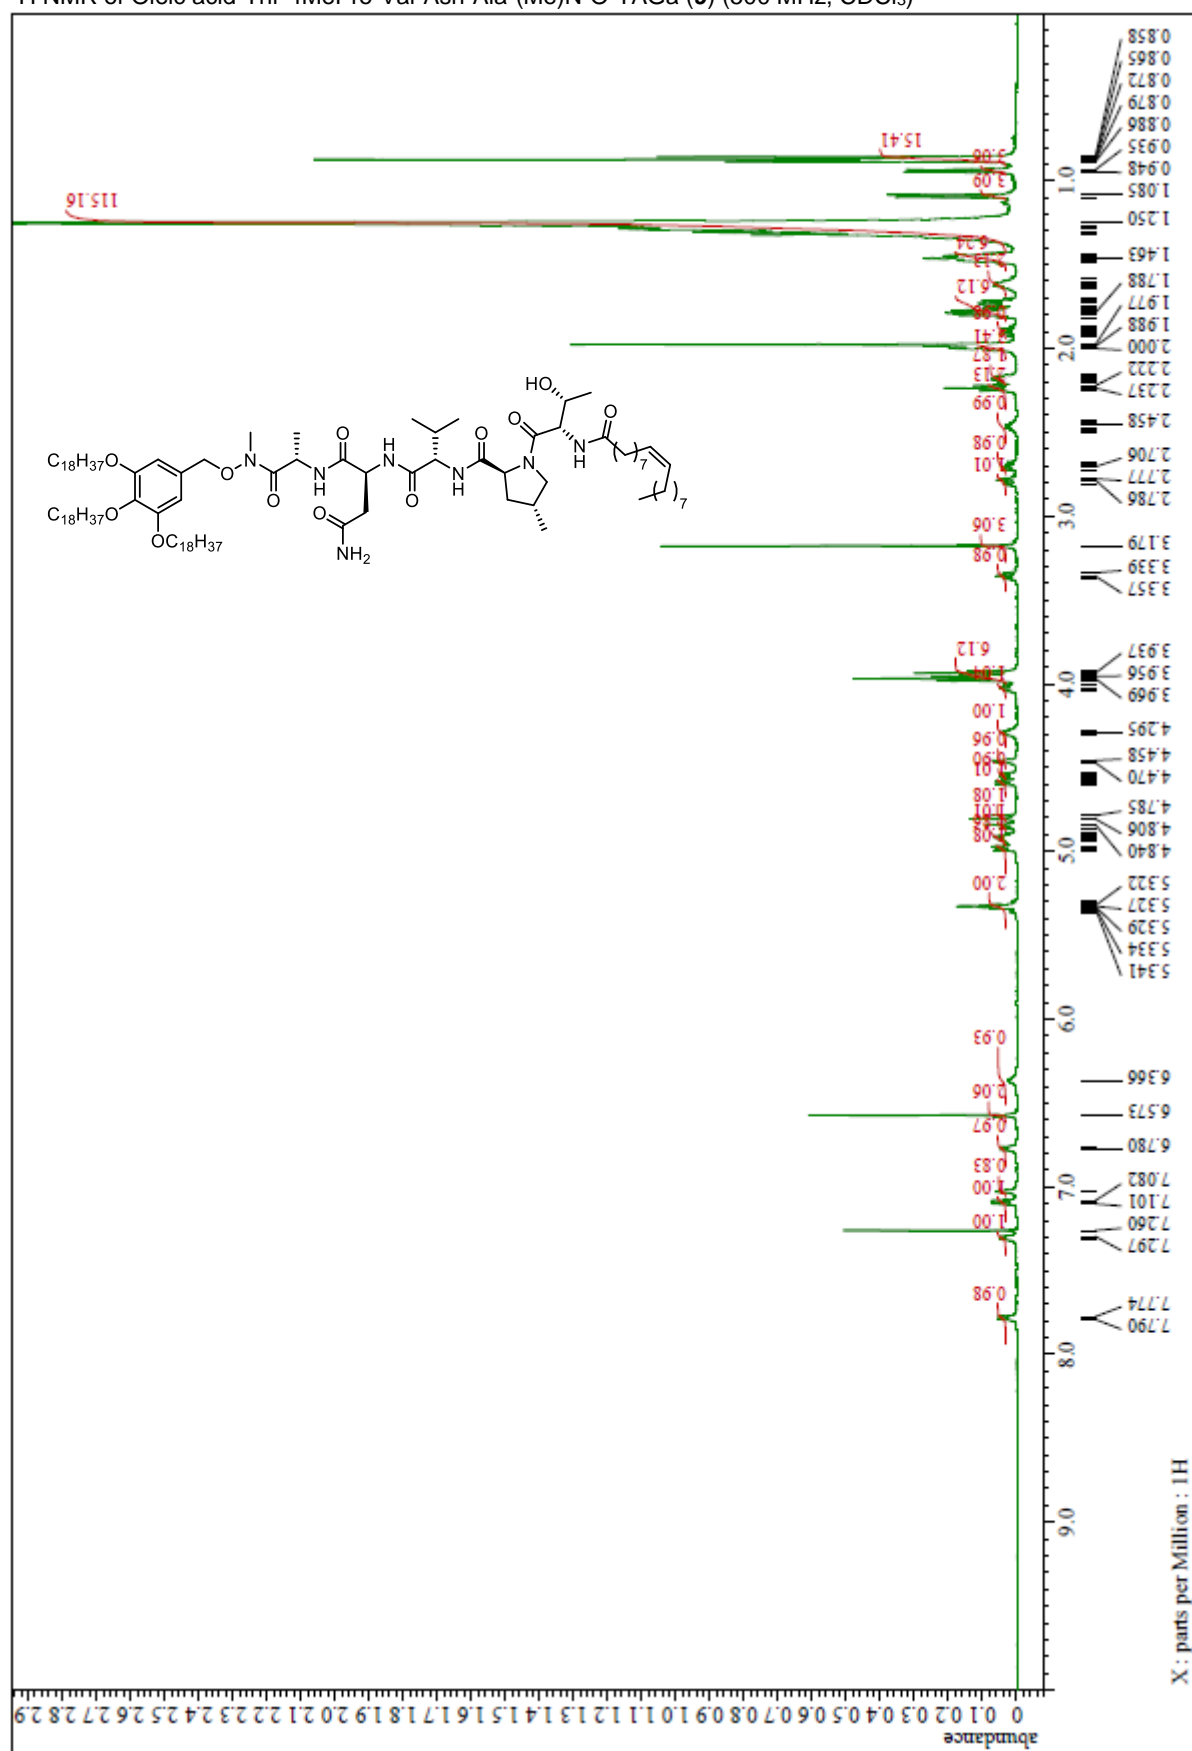

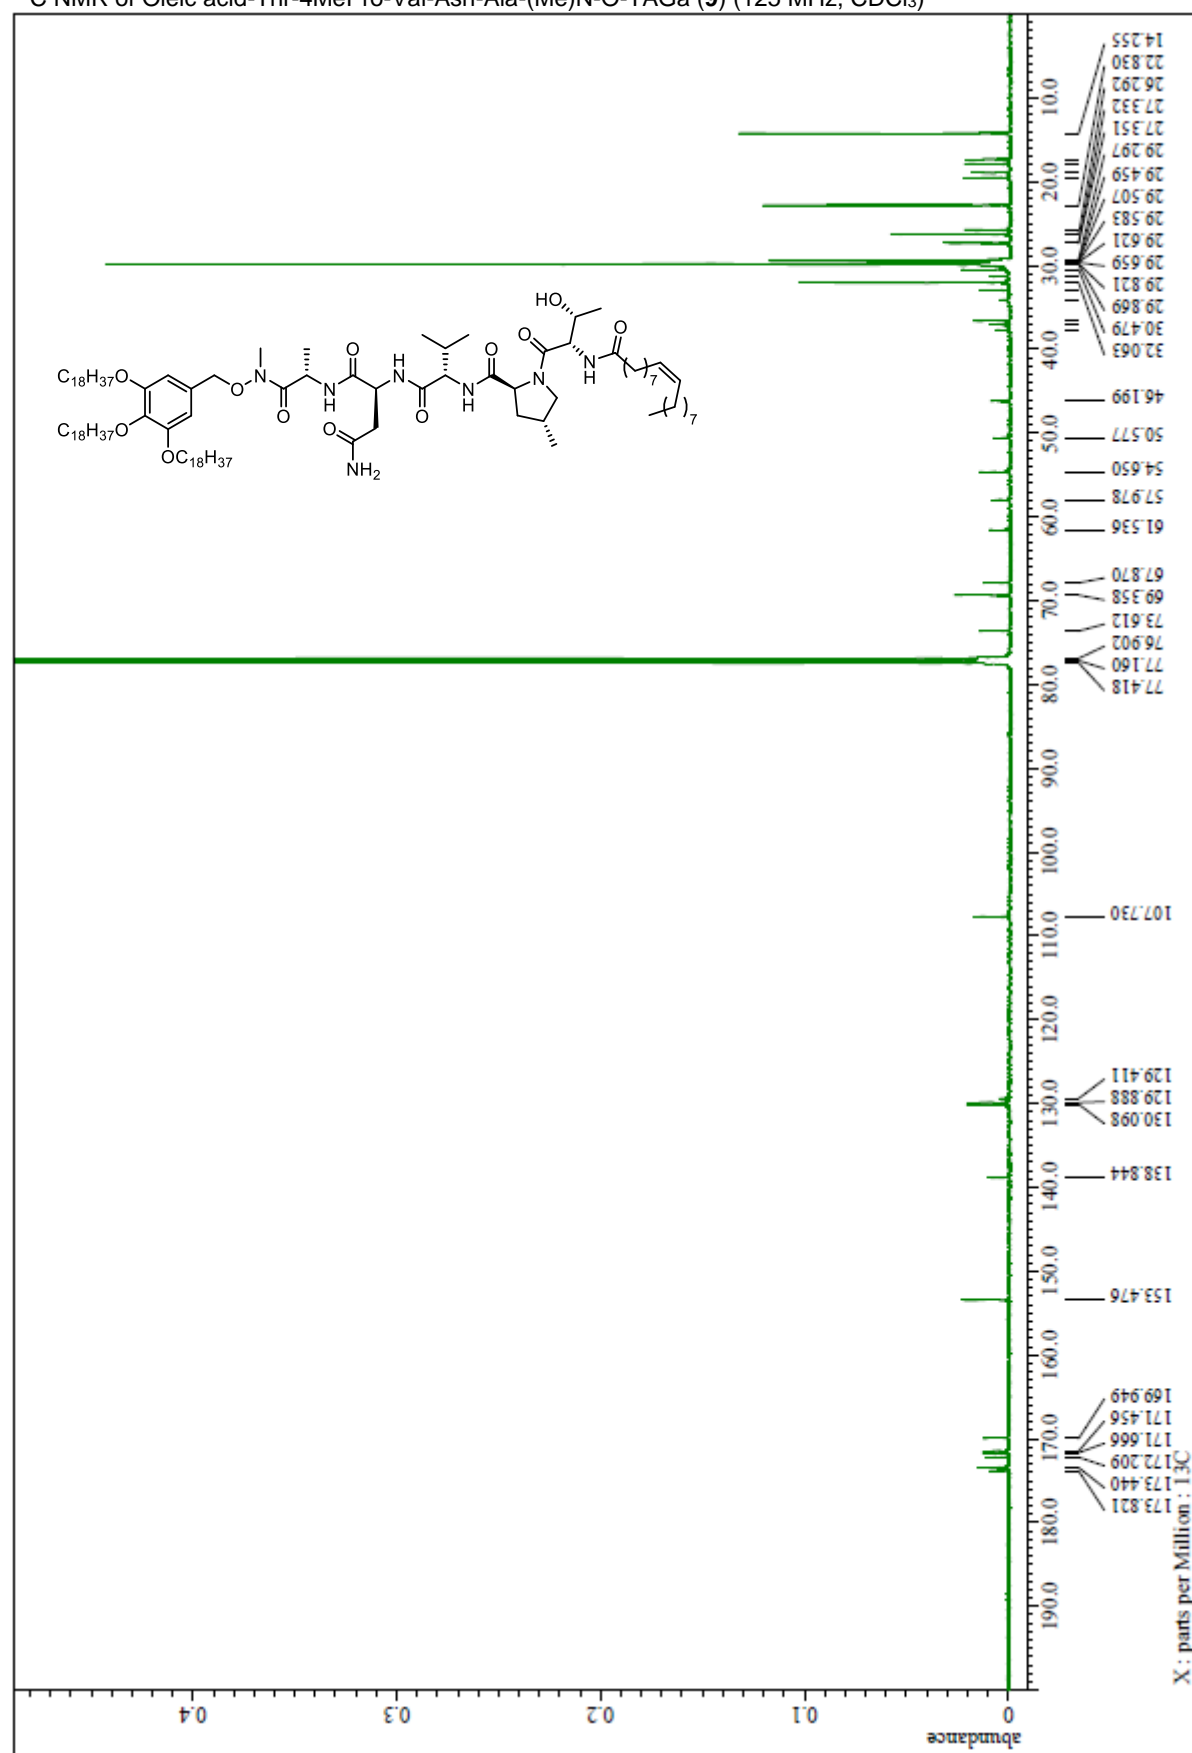

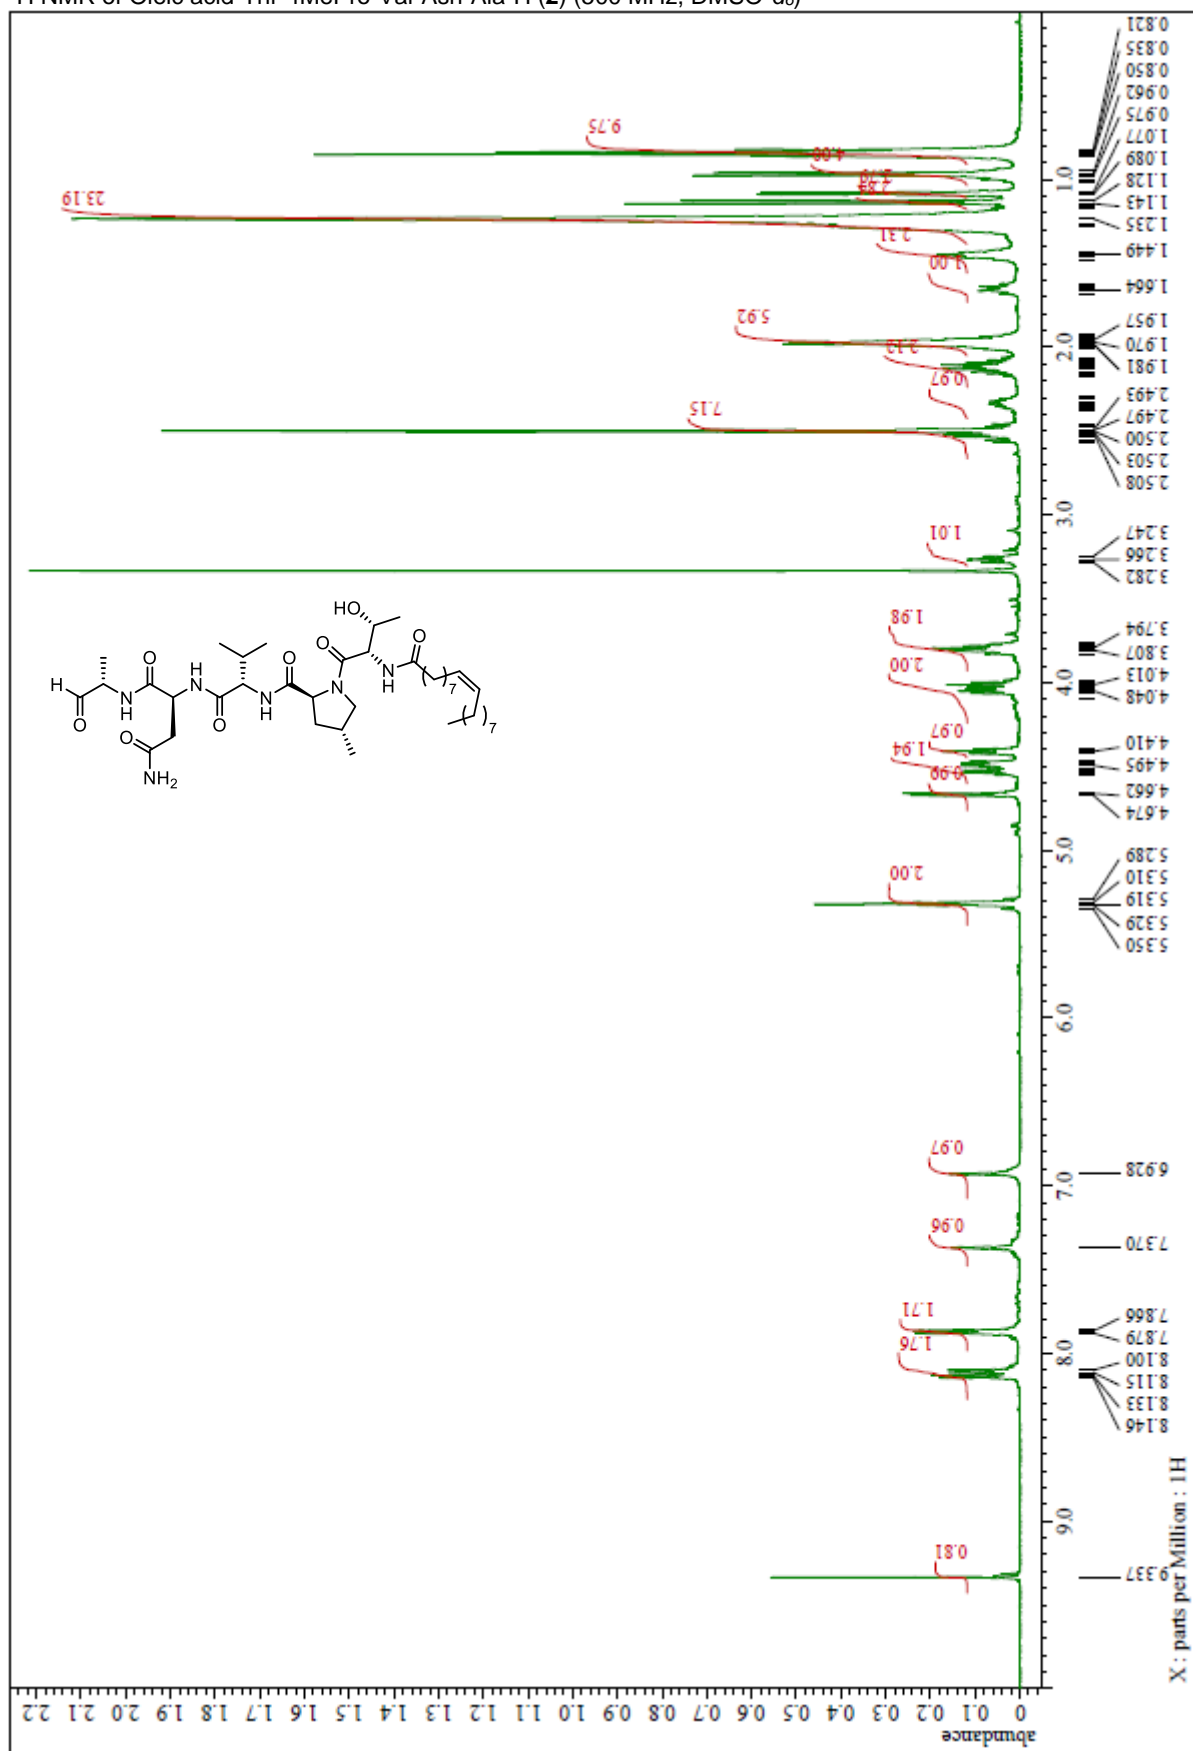

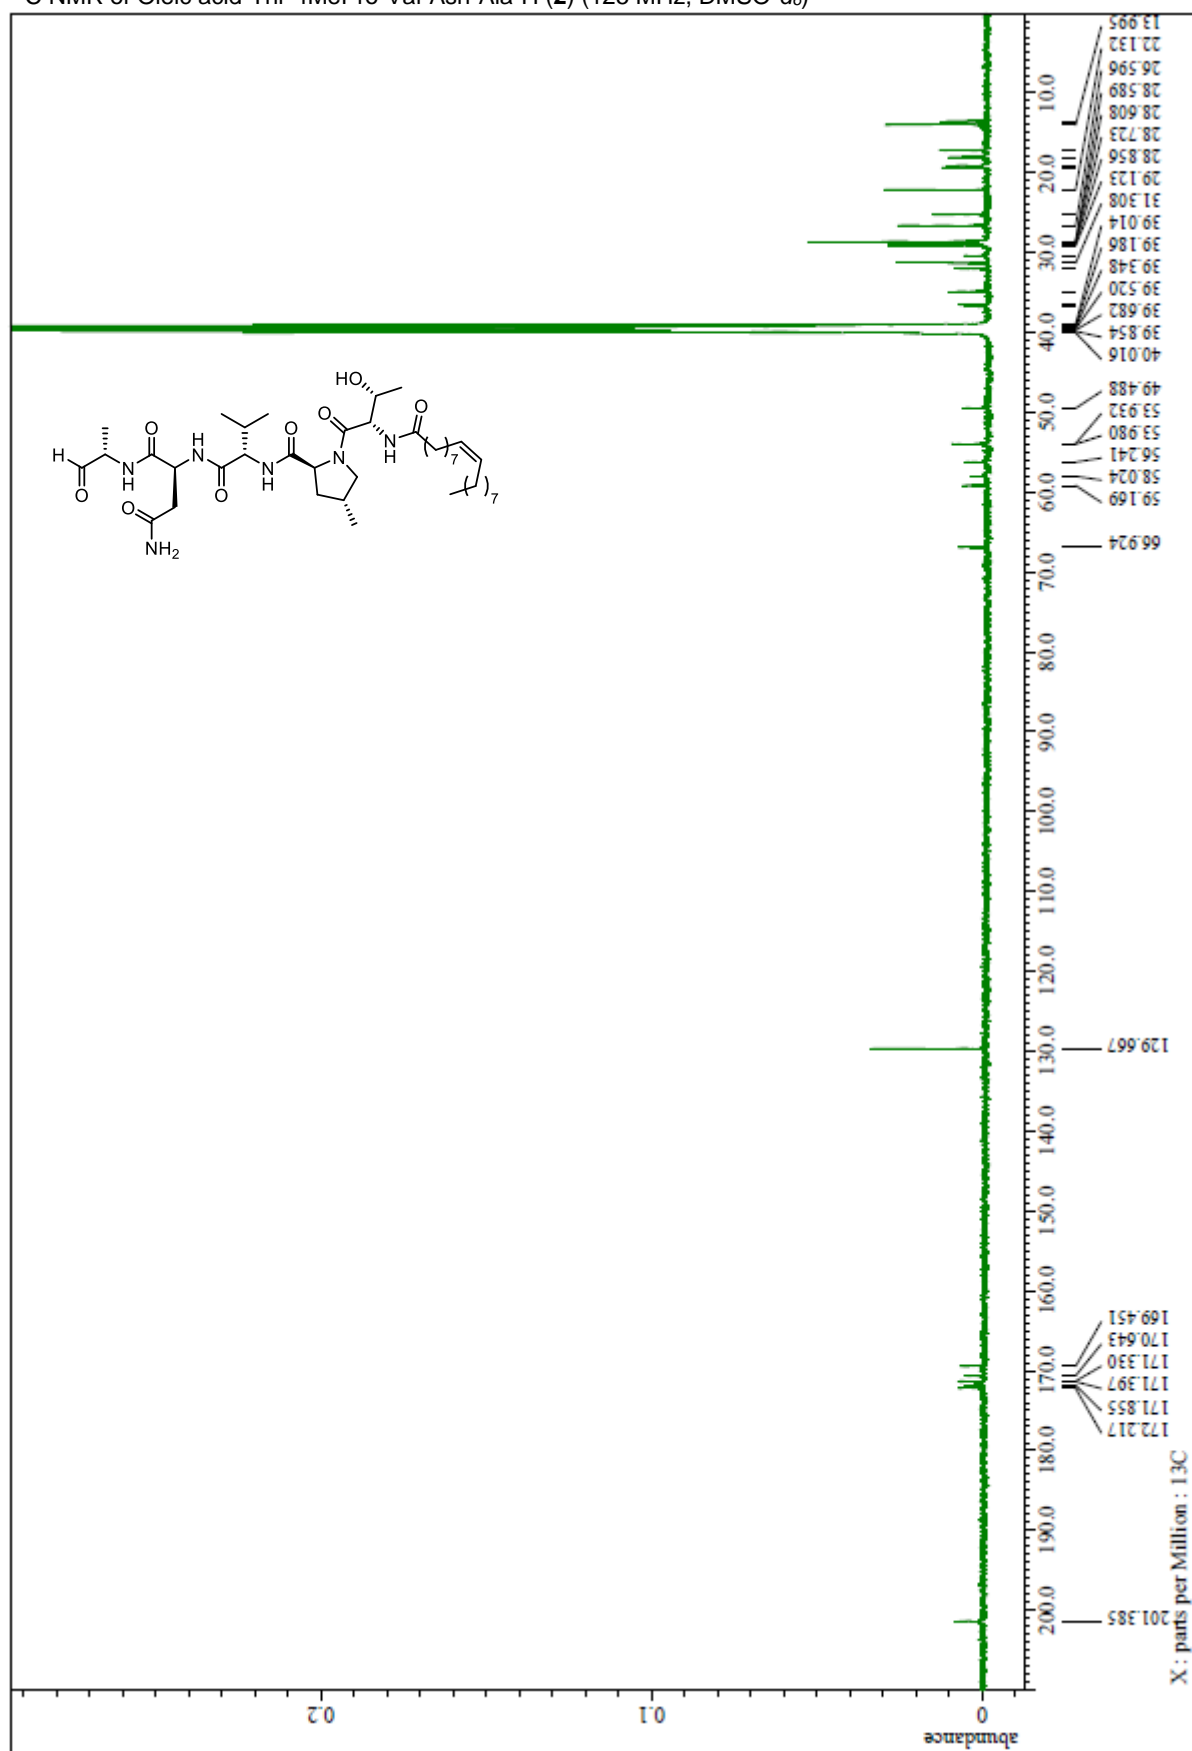

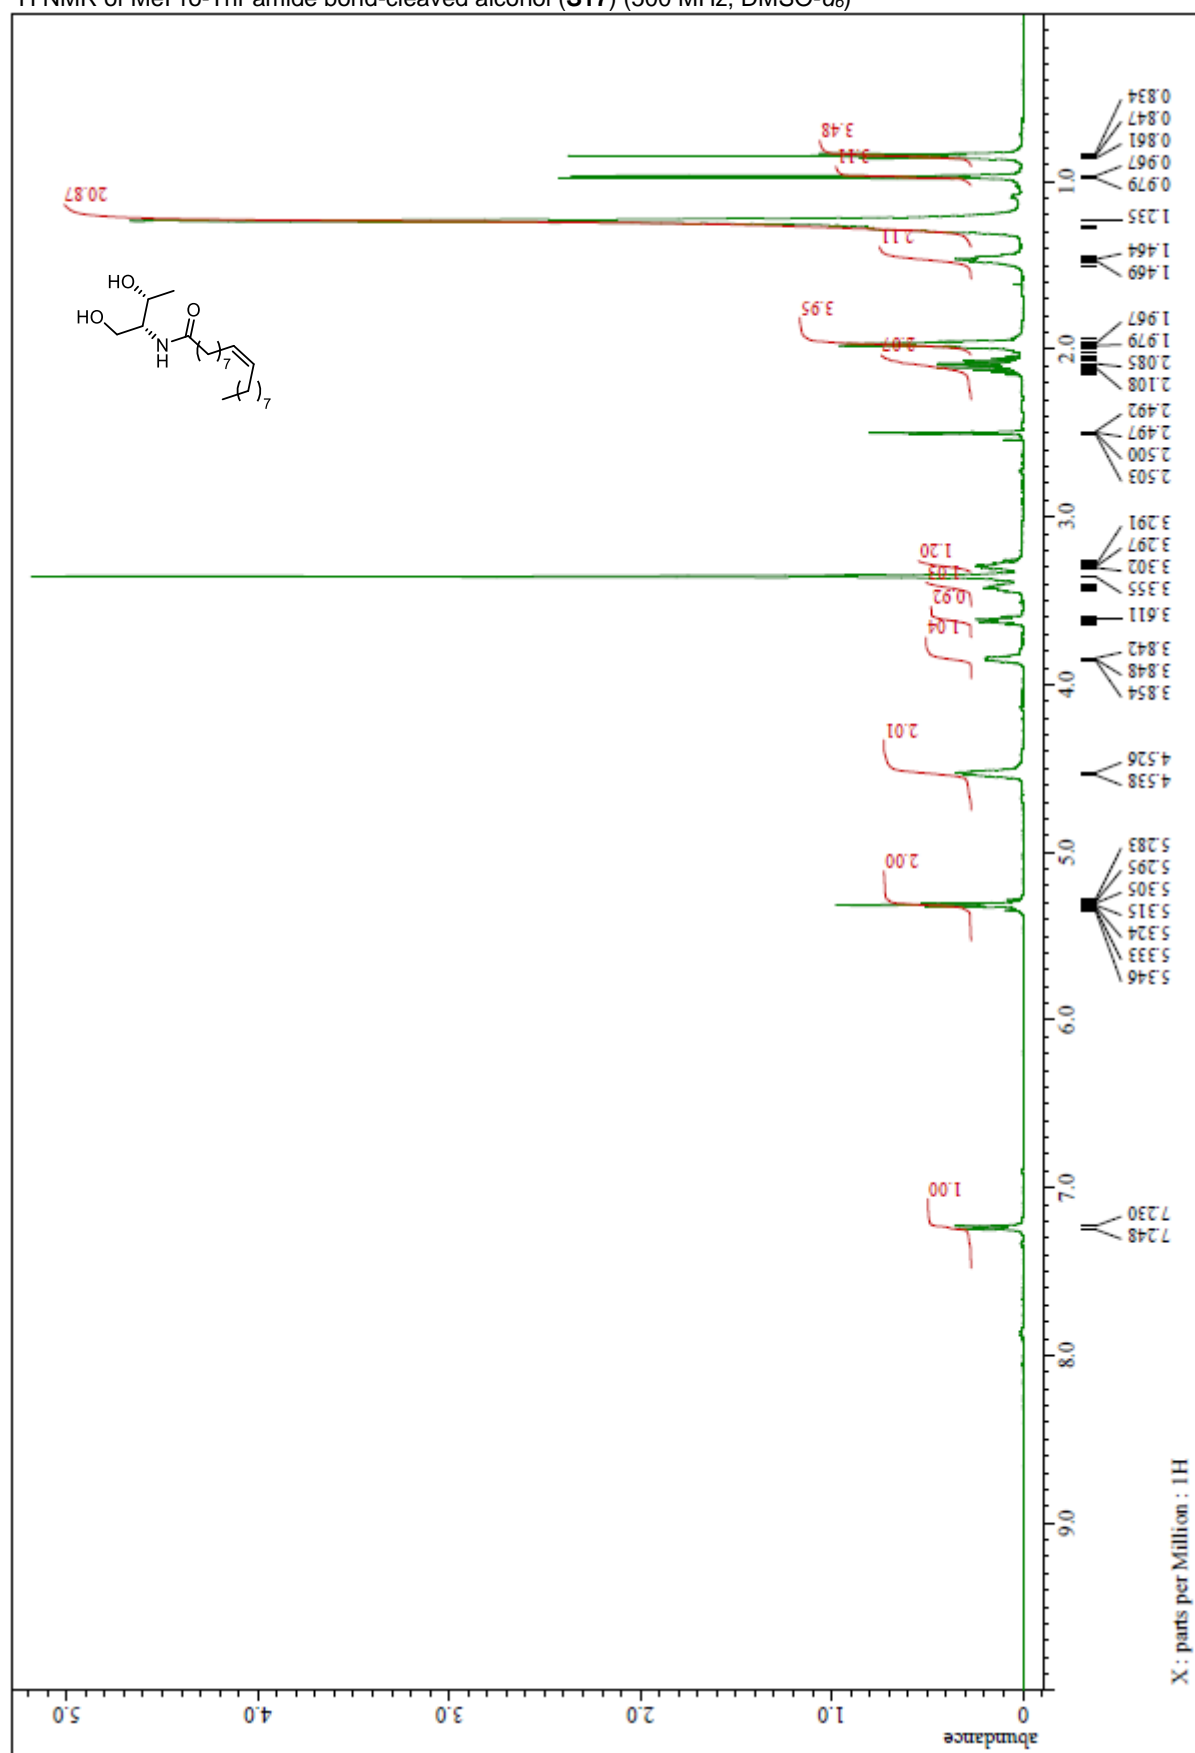

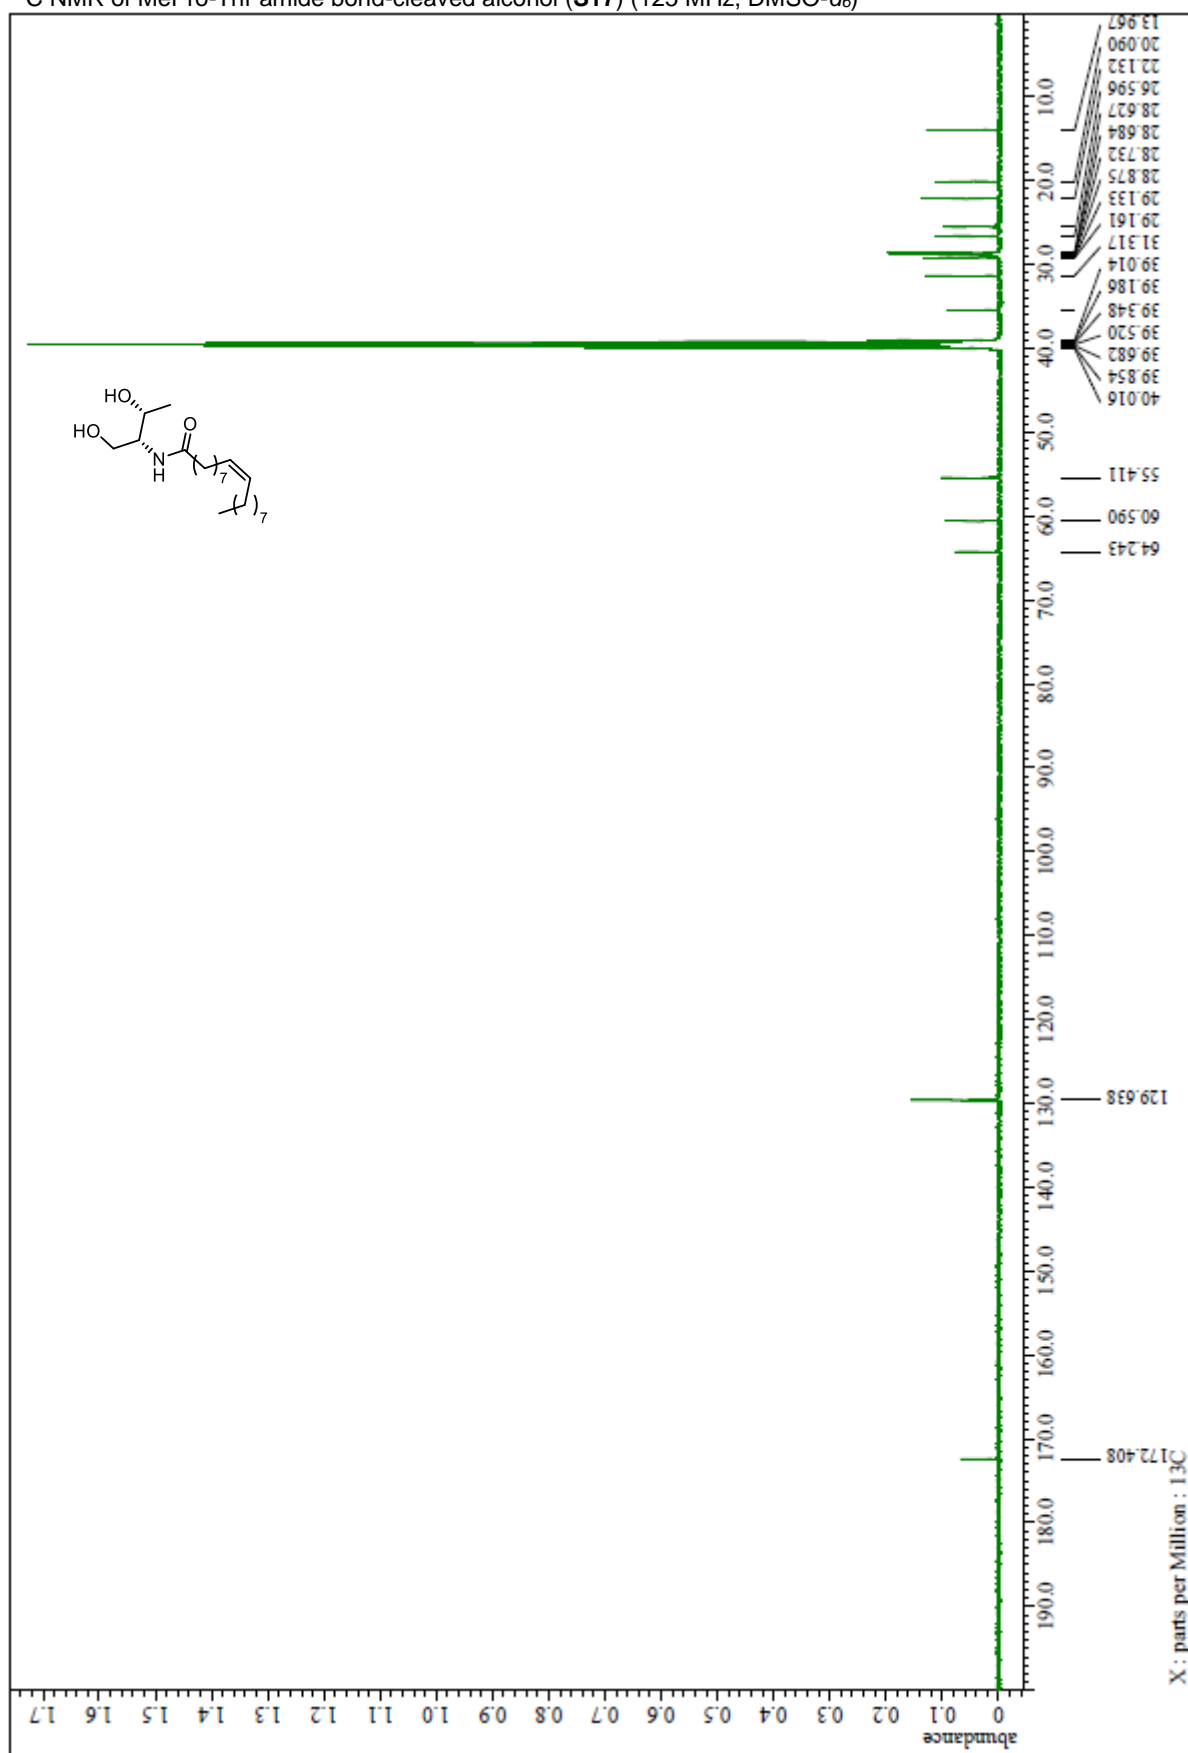



$^1\text{H}$  NMR of recovered Me-HN-O-TAGa (**3**) (up) and newly prepared **3** (500 MHz,  $\text{CDCl}_3$  + conc.  $\text{HCl}$ )

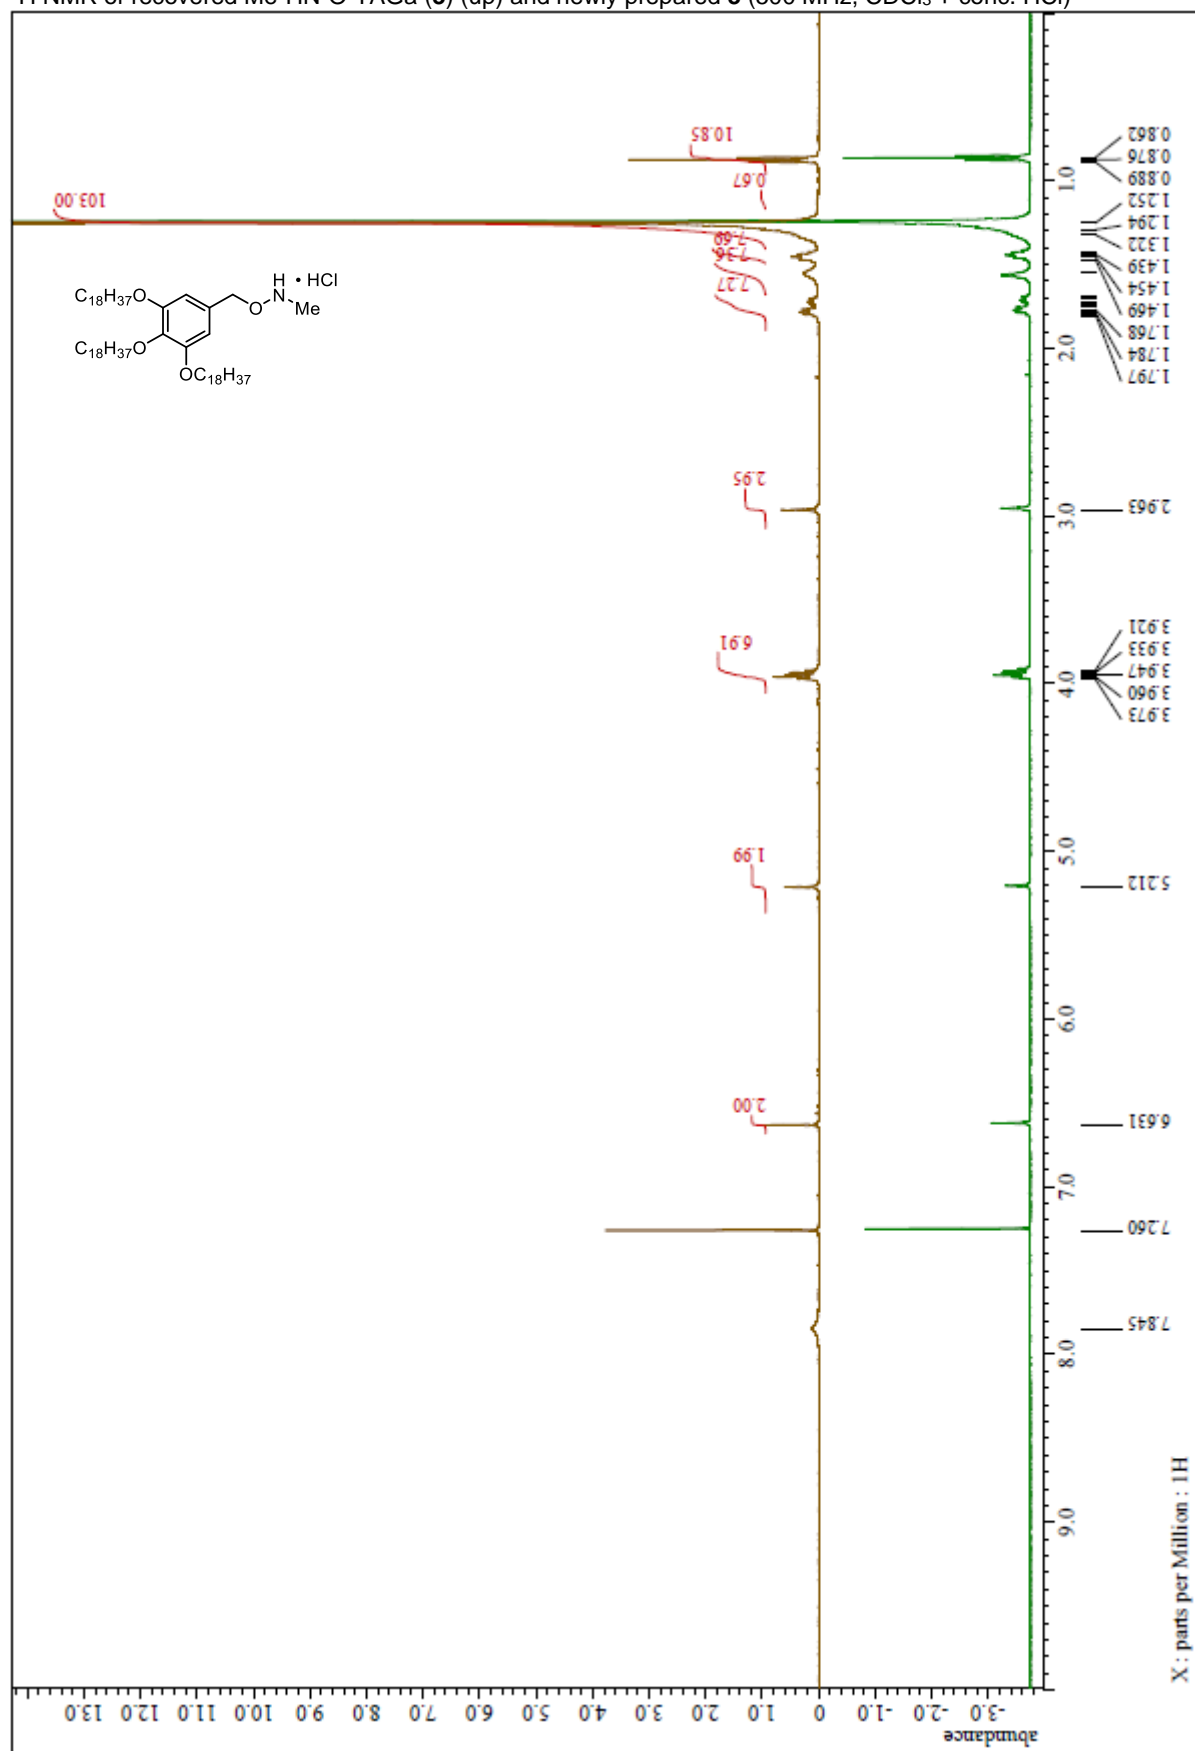

$^1\text{H}$  NMR of Fmoc-Val-Ala-(Me)N-O-TAGa (**S21**) (500 MHz,  $\text{CDCl}_3$ )

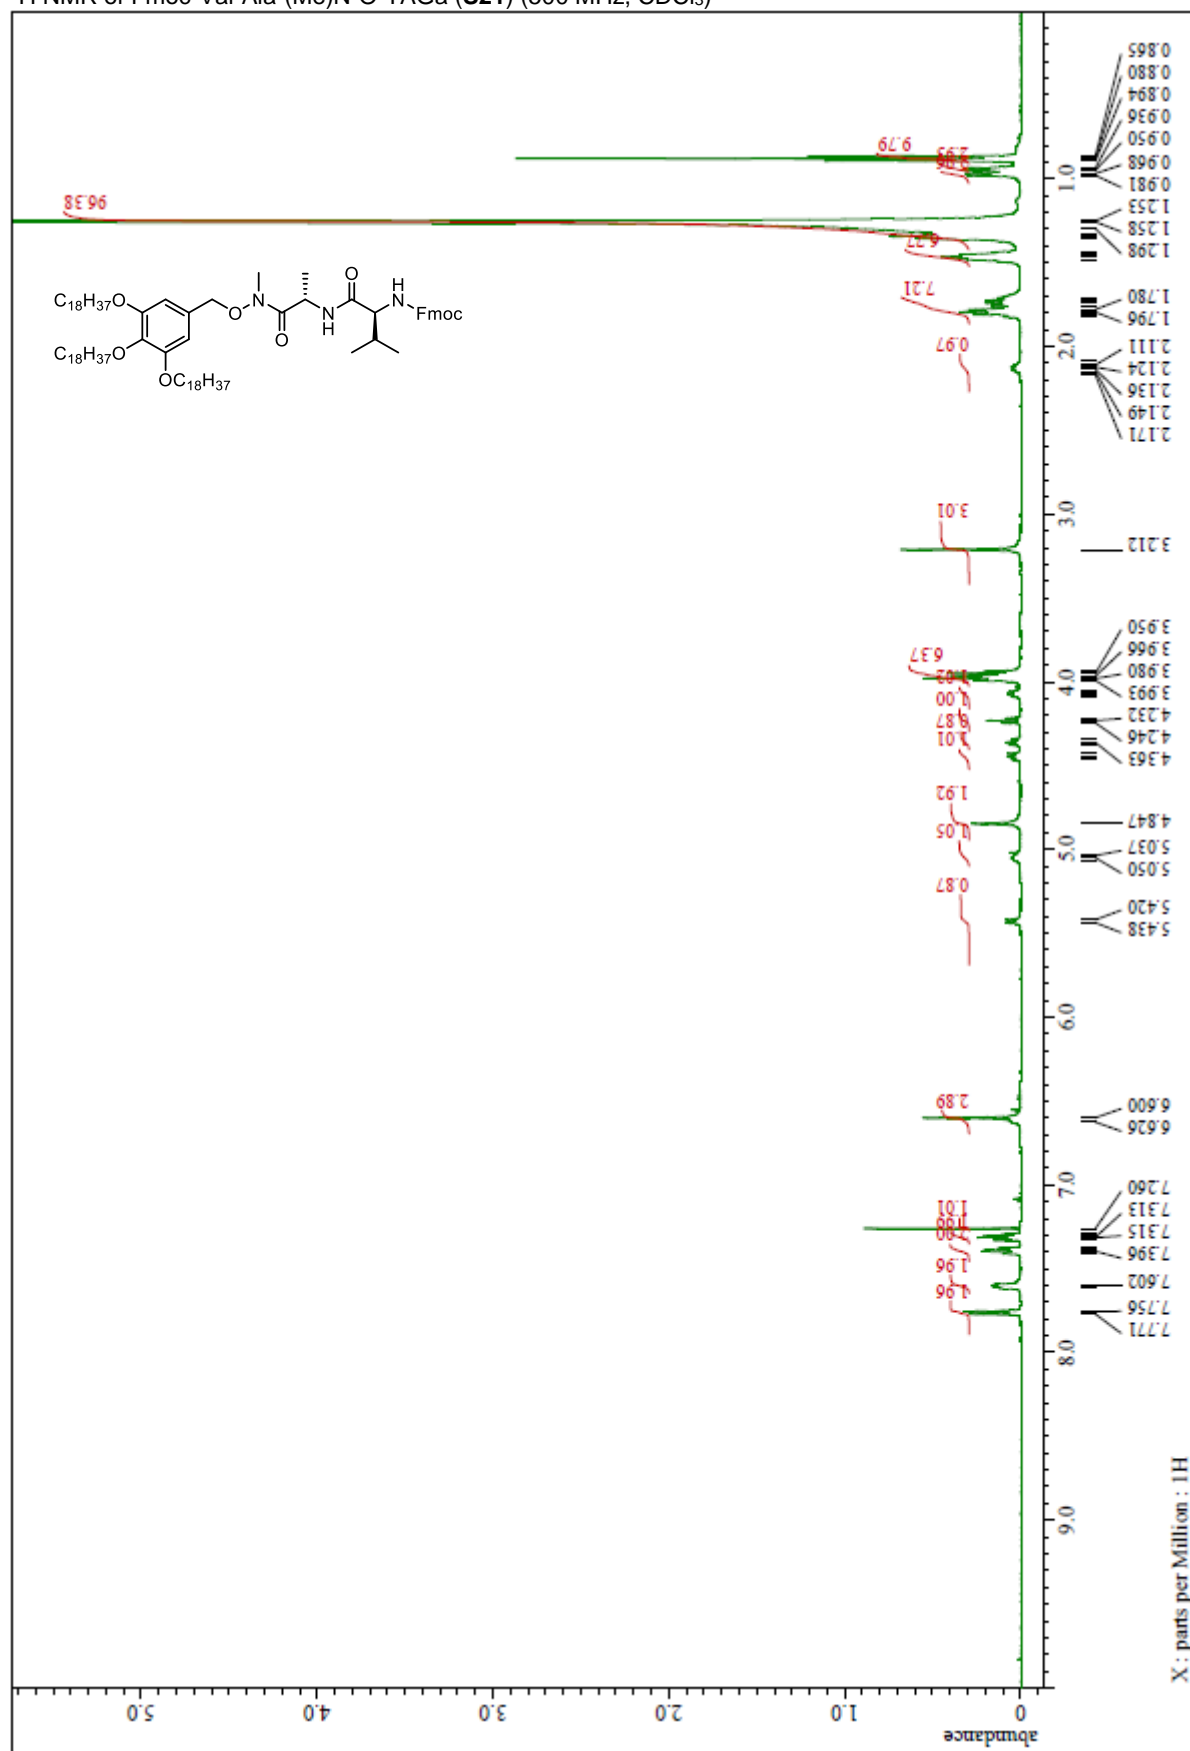

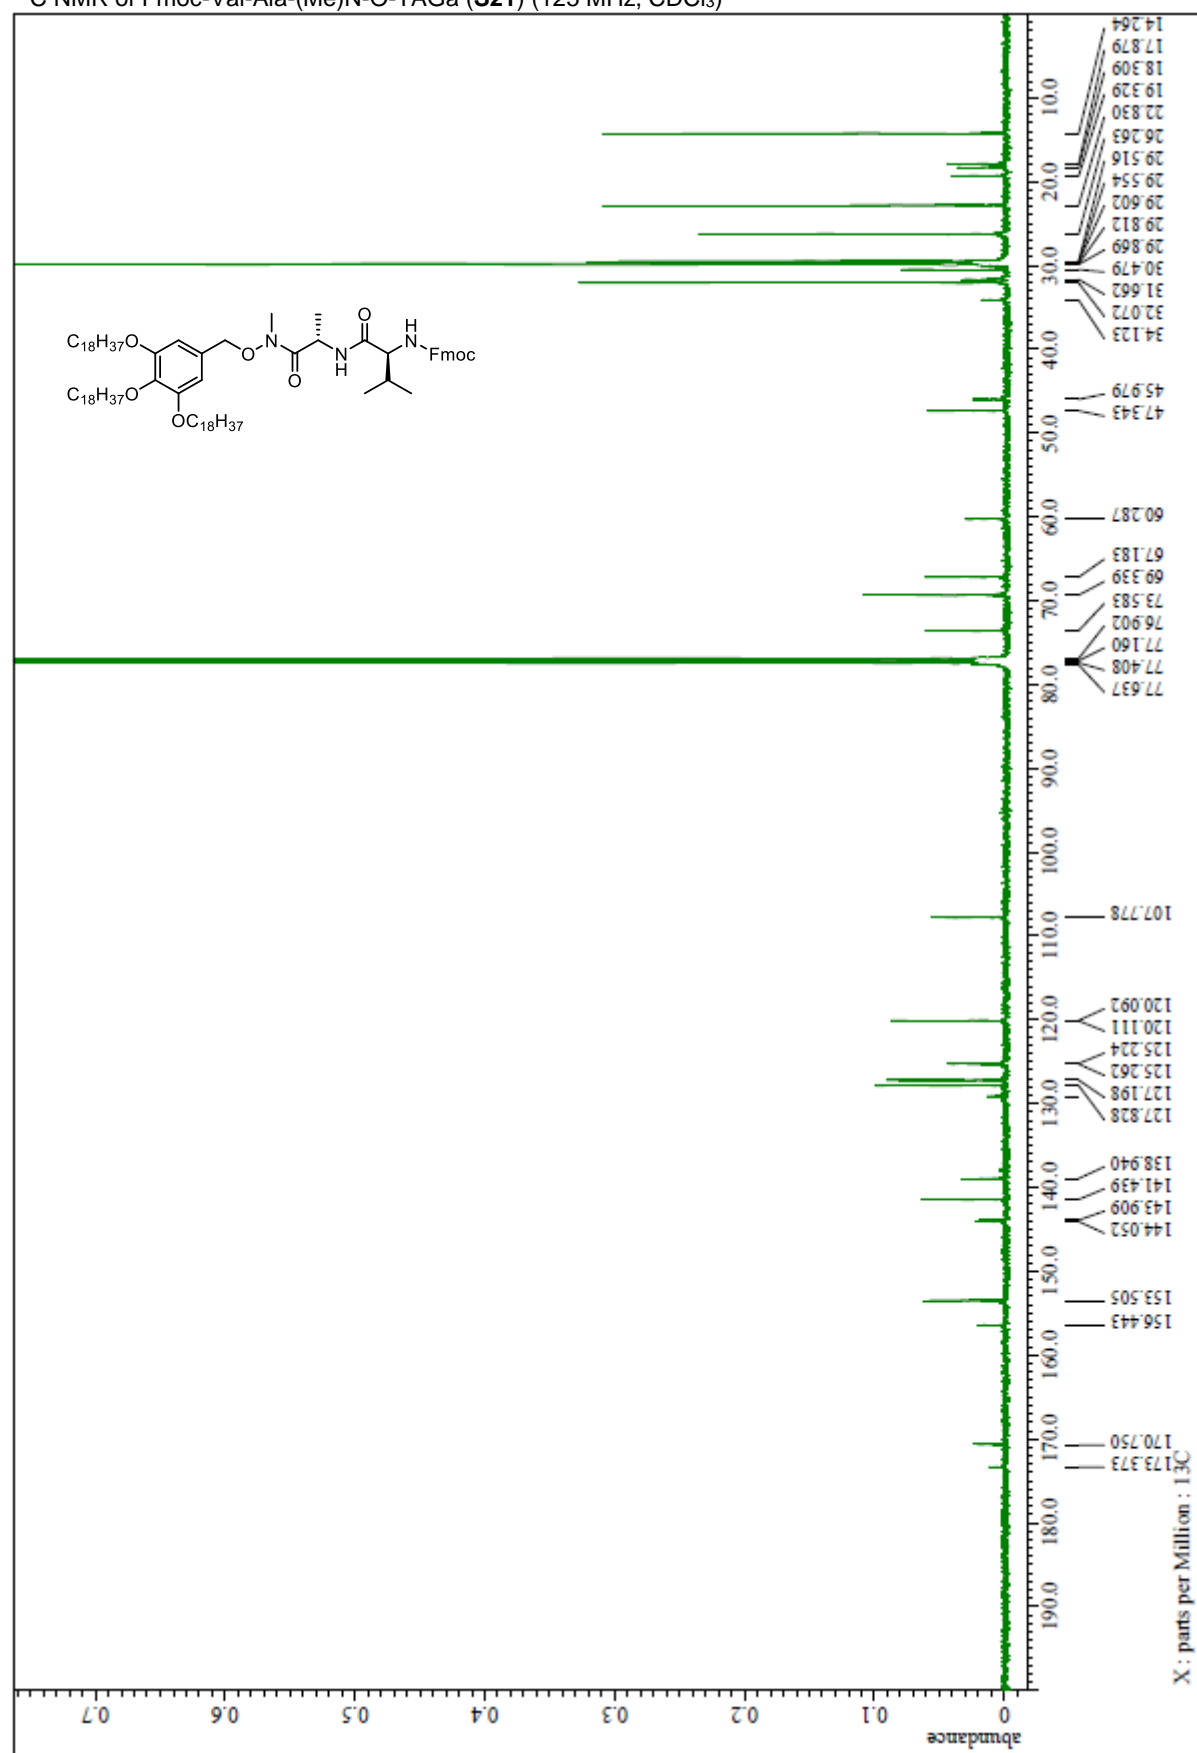

<sup>1</sup>H NMR of Val-Ala-(Me)N-O-TAGa (**S22**) (500 MHz, CDCl<sub>3</sub>)

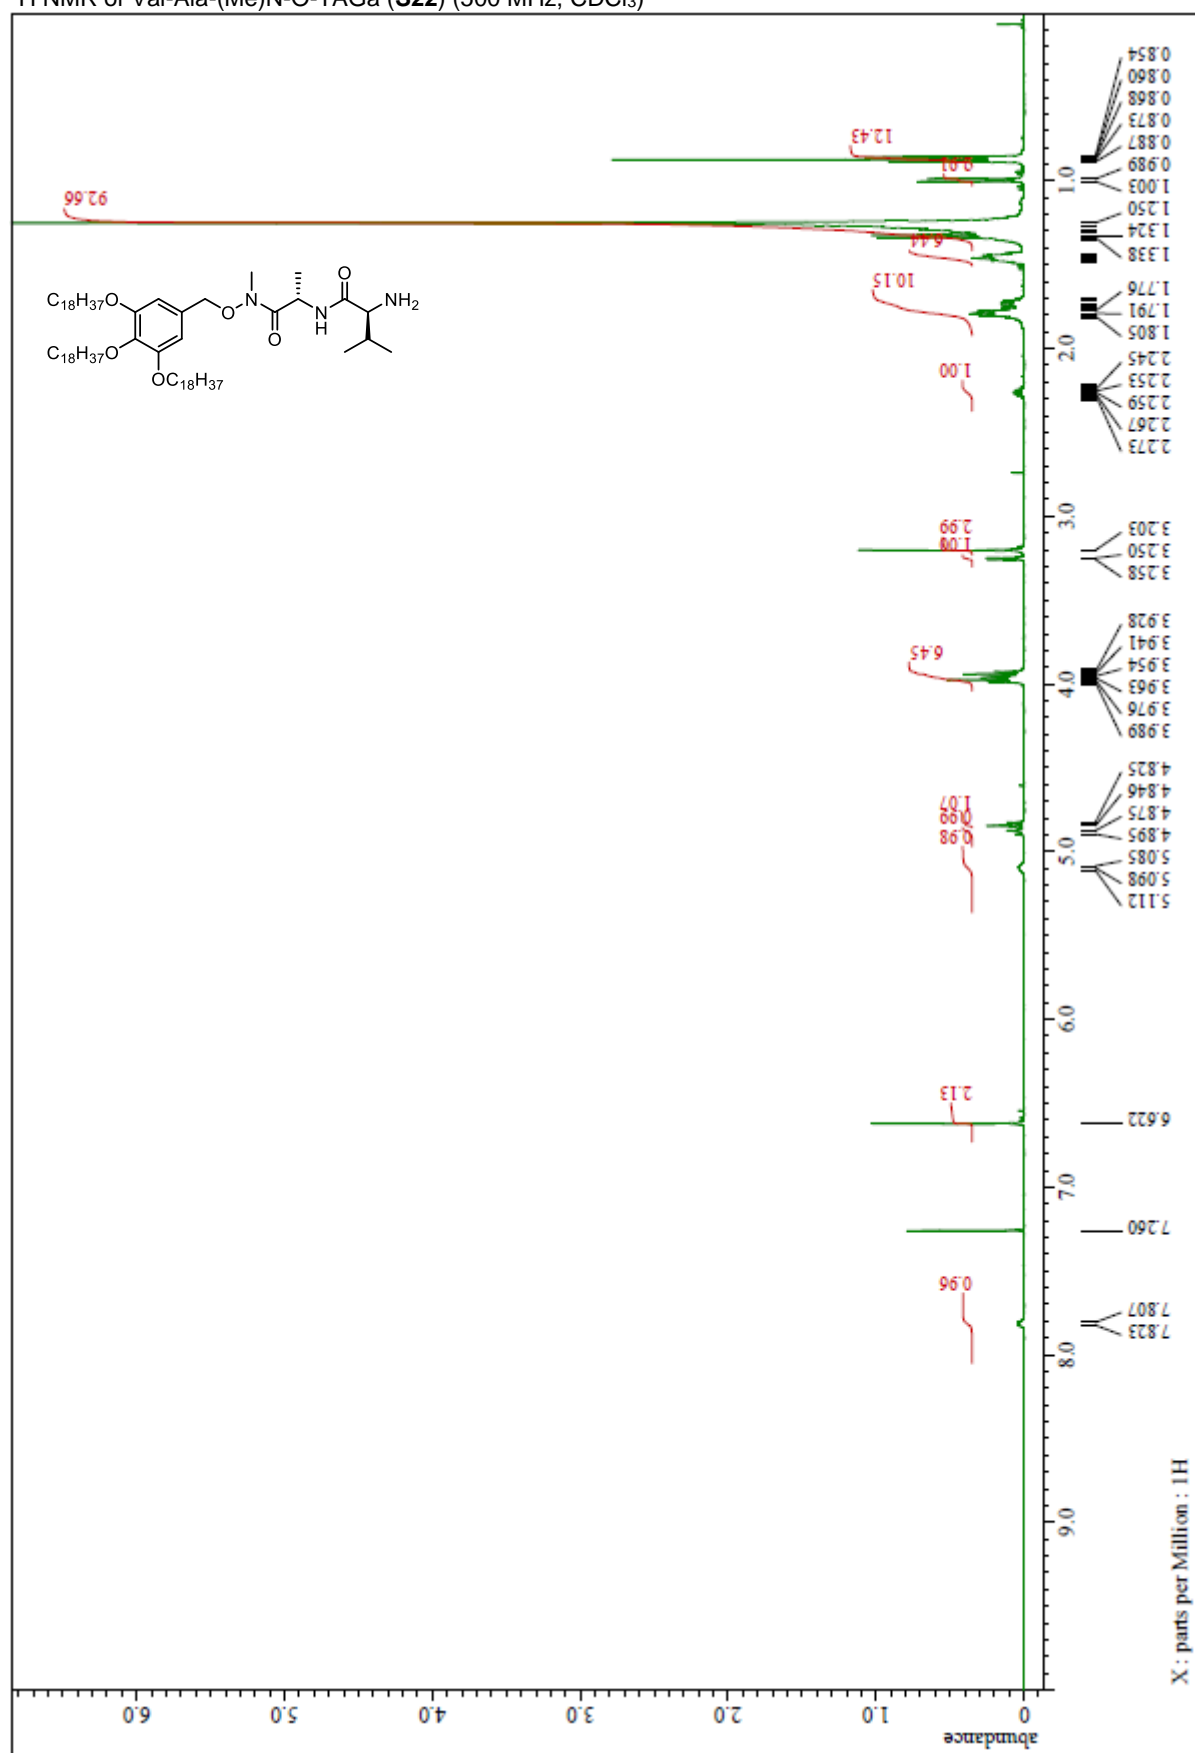

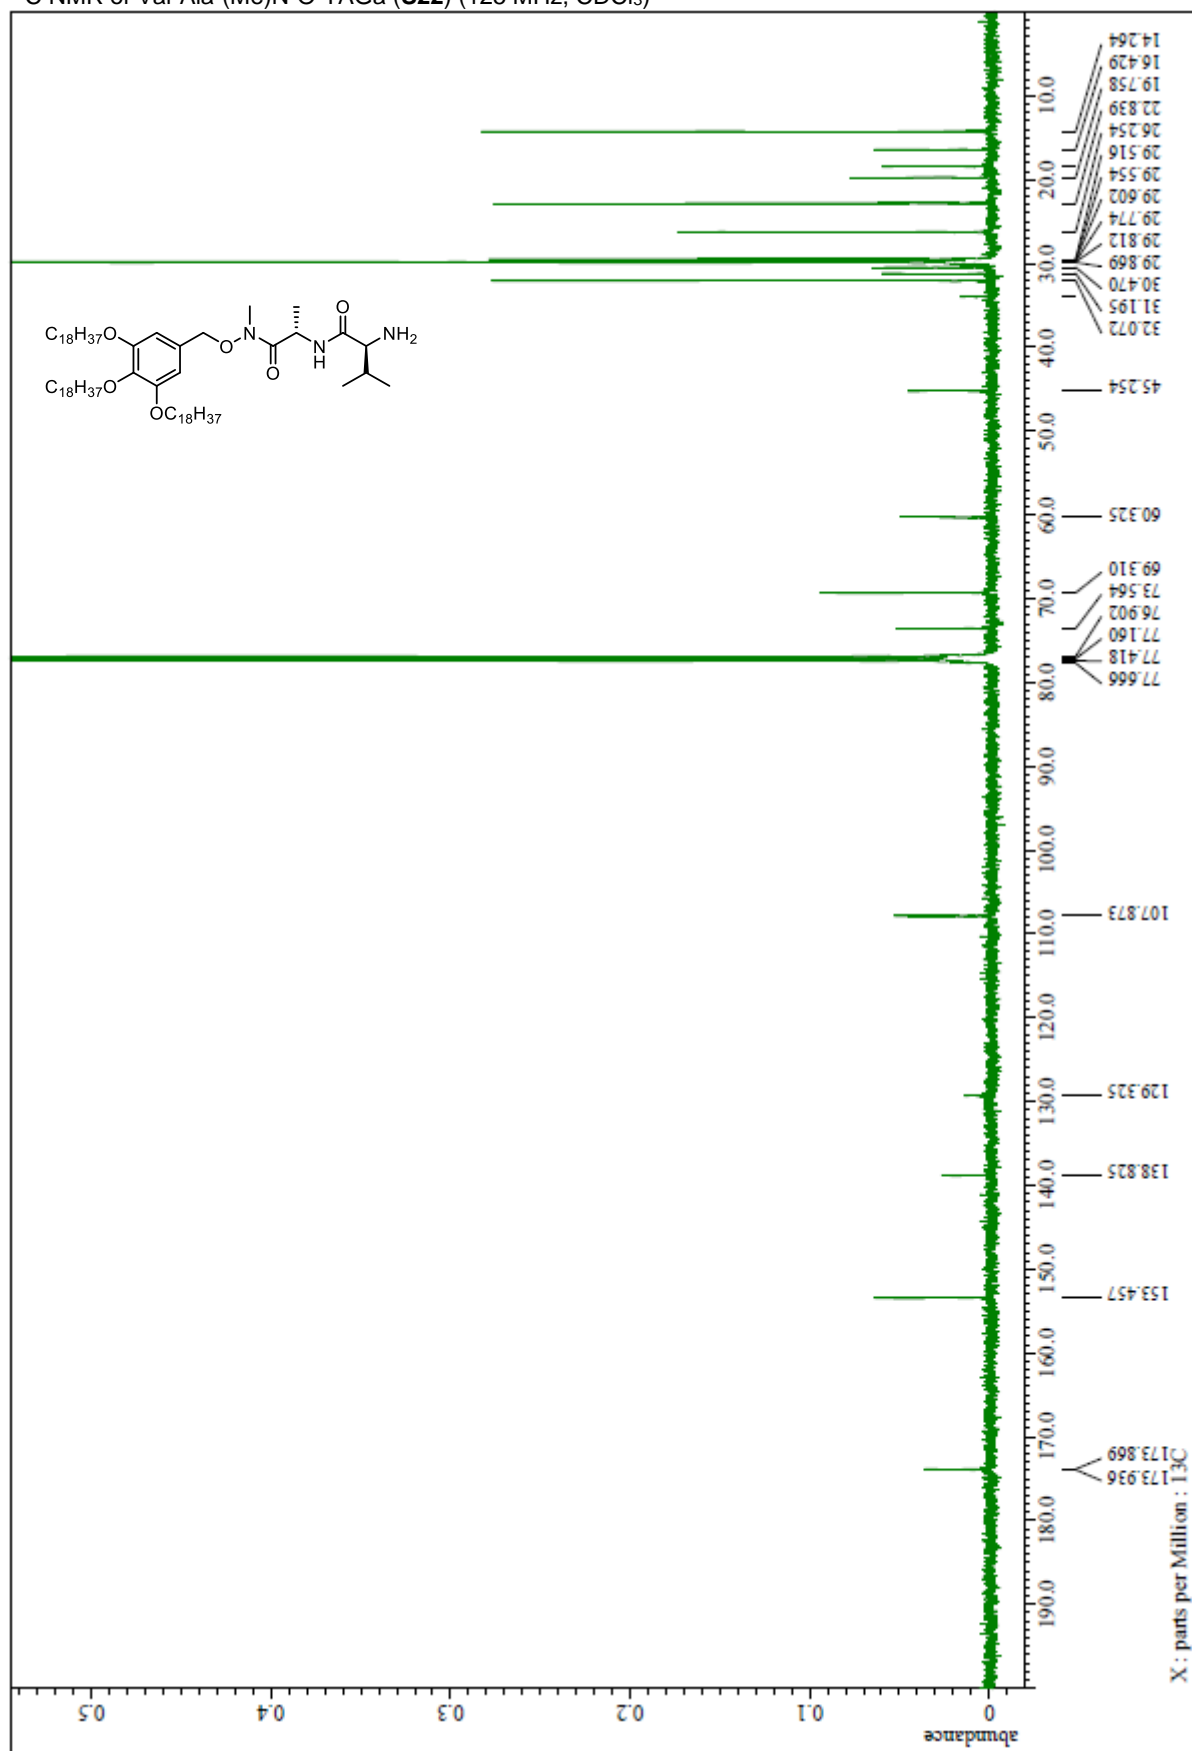

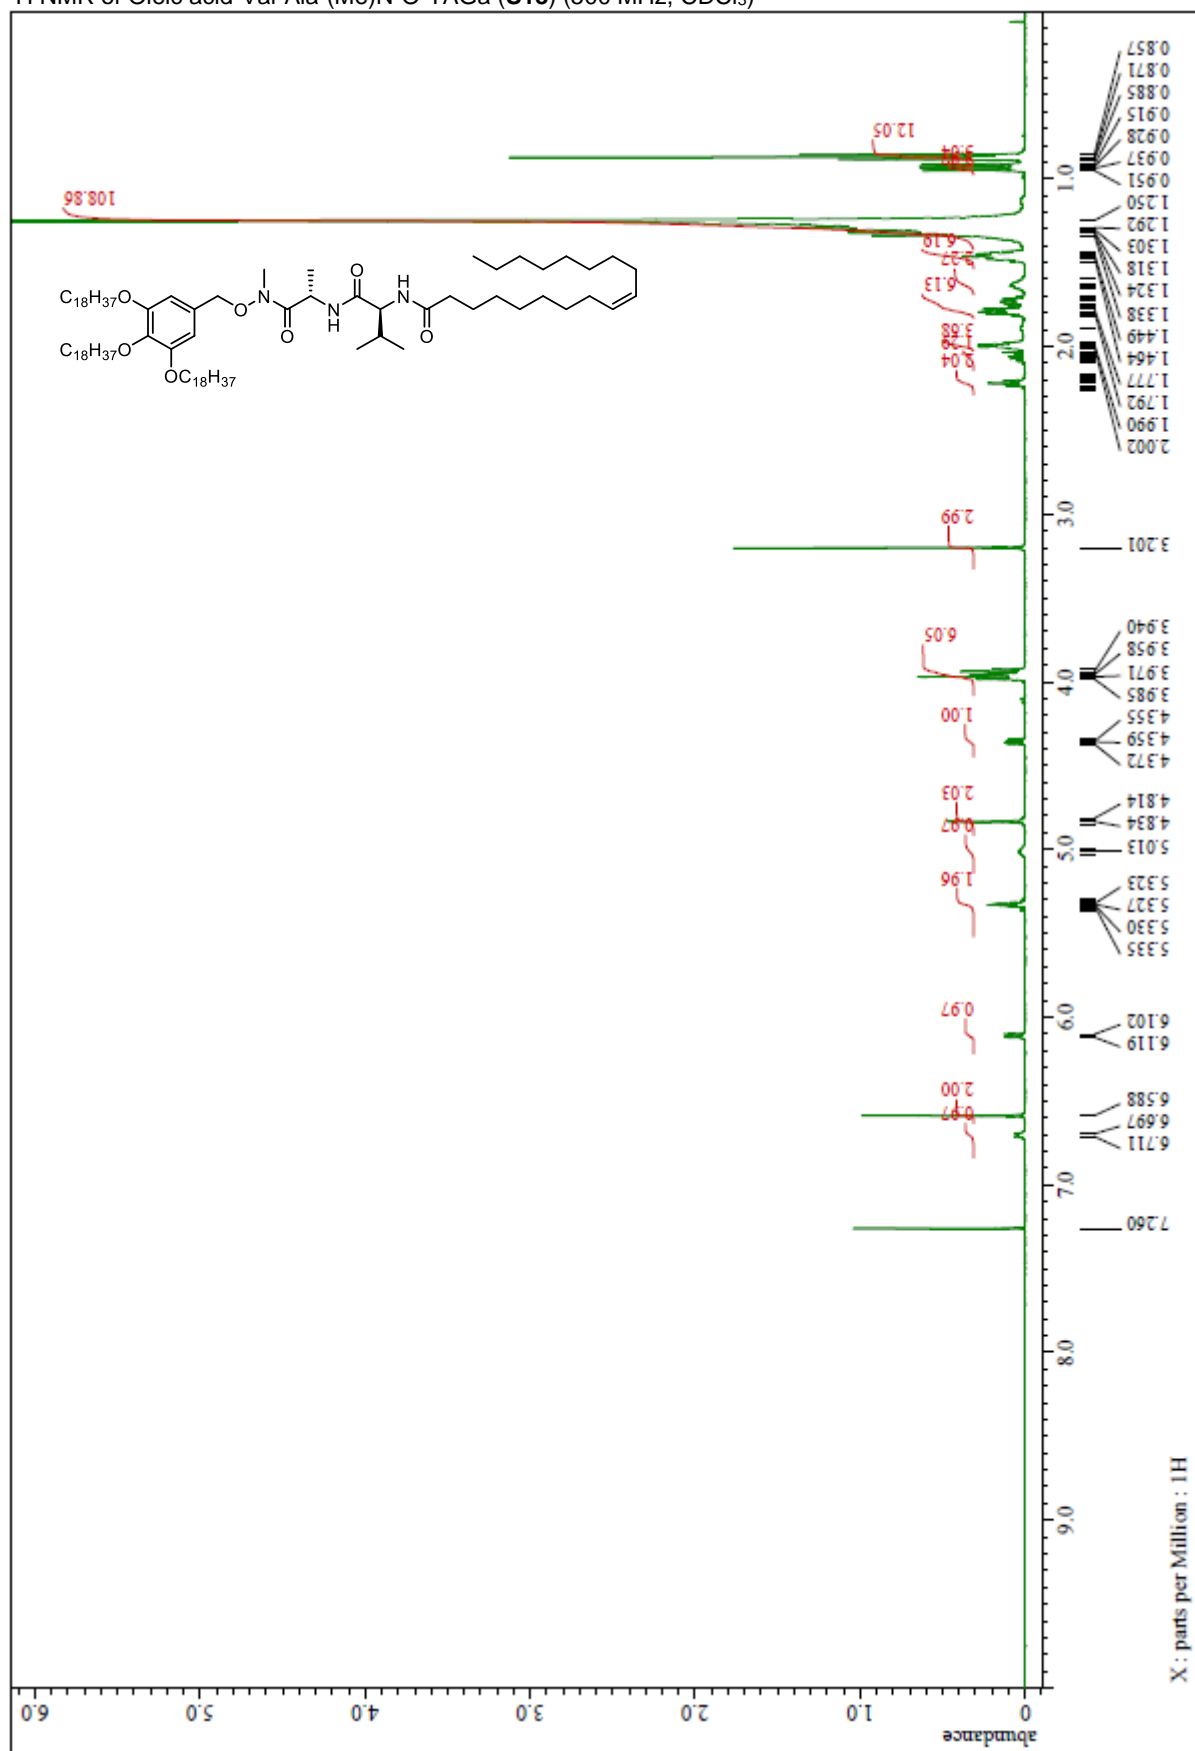

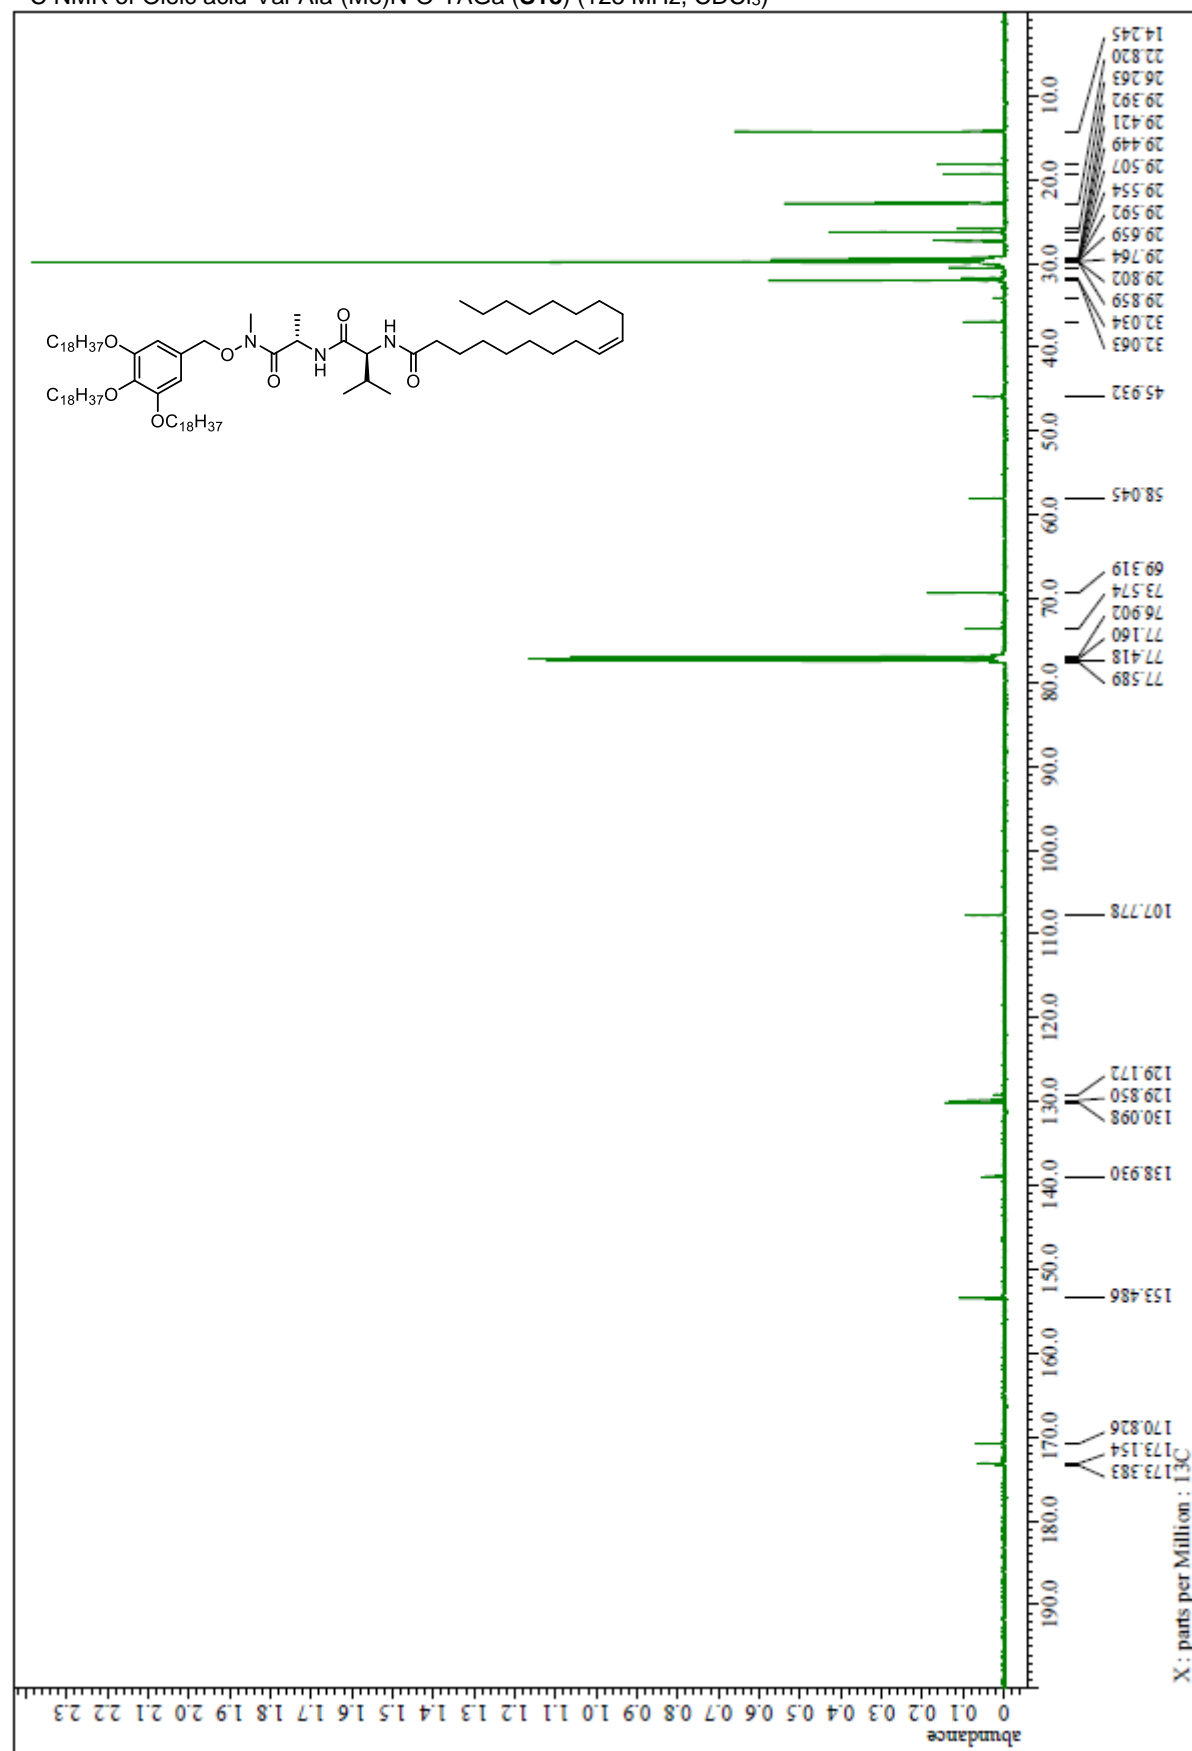

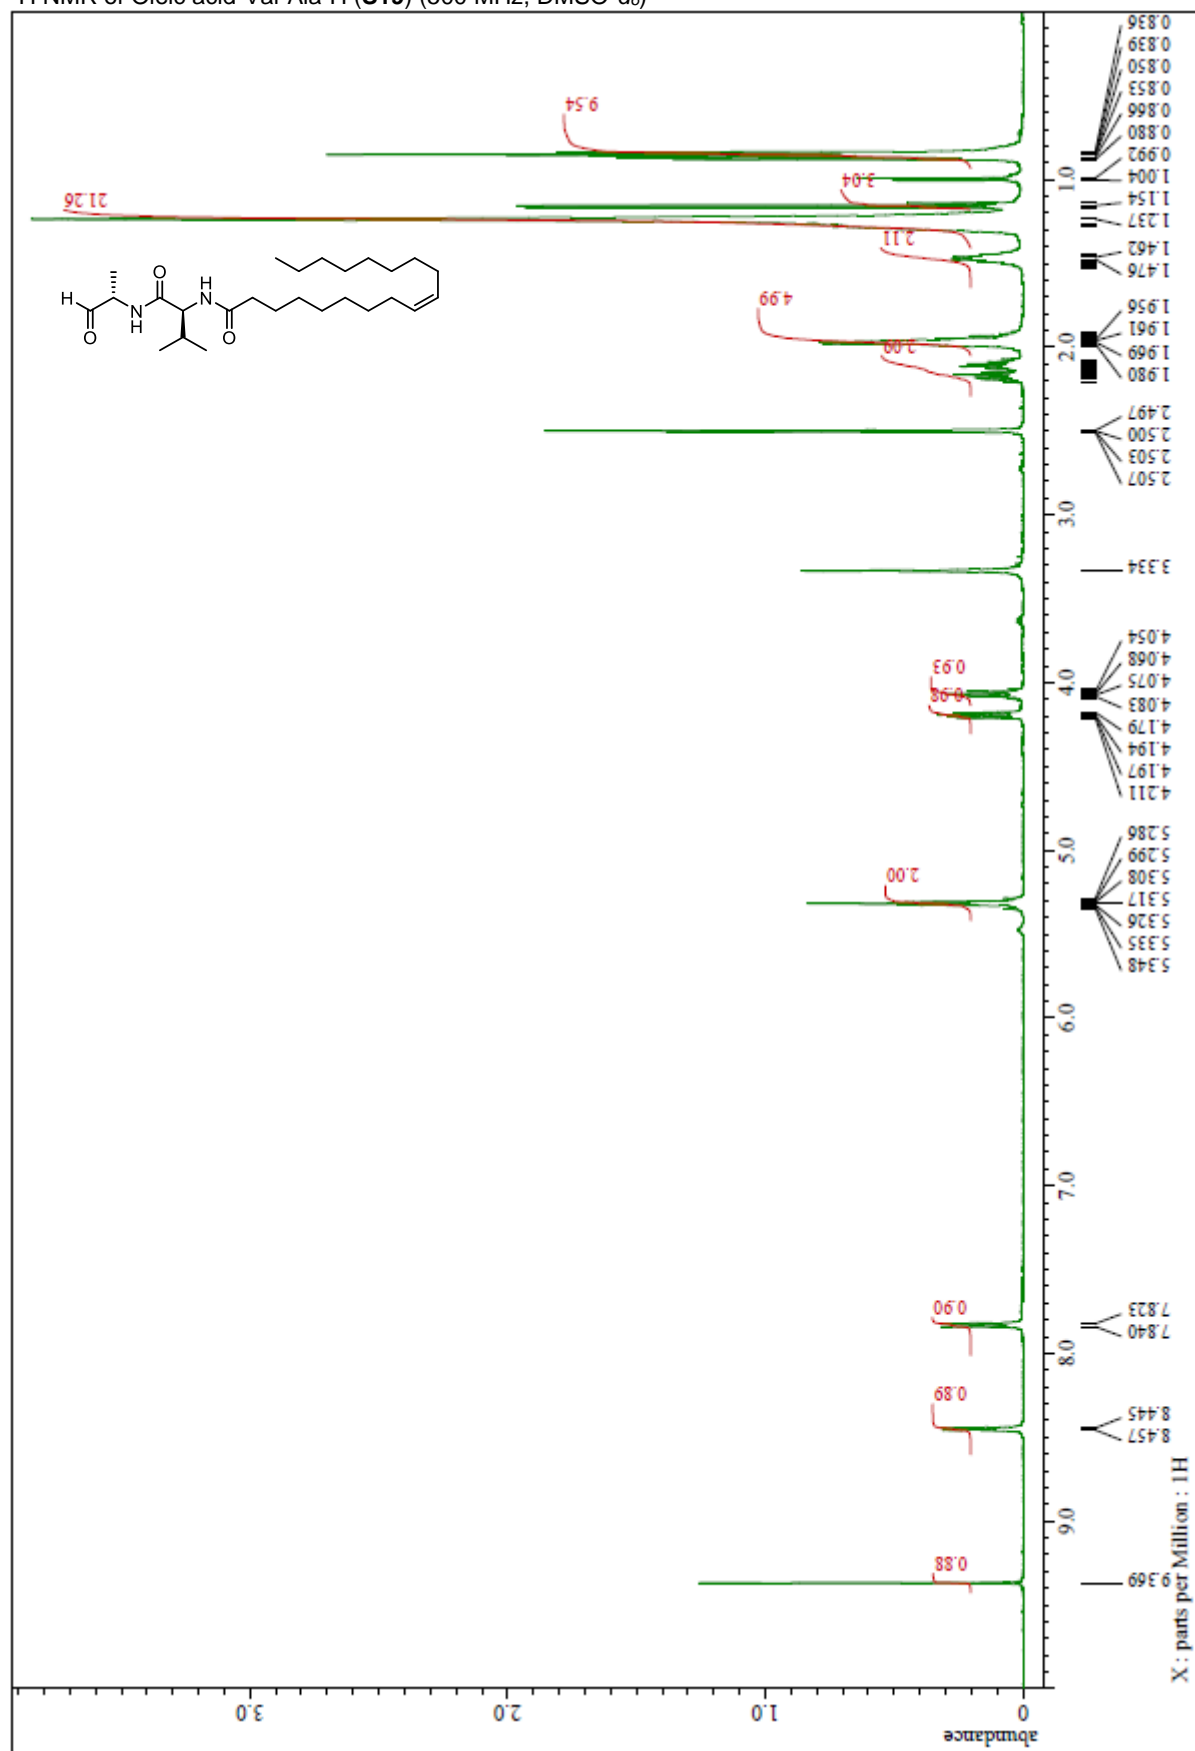



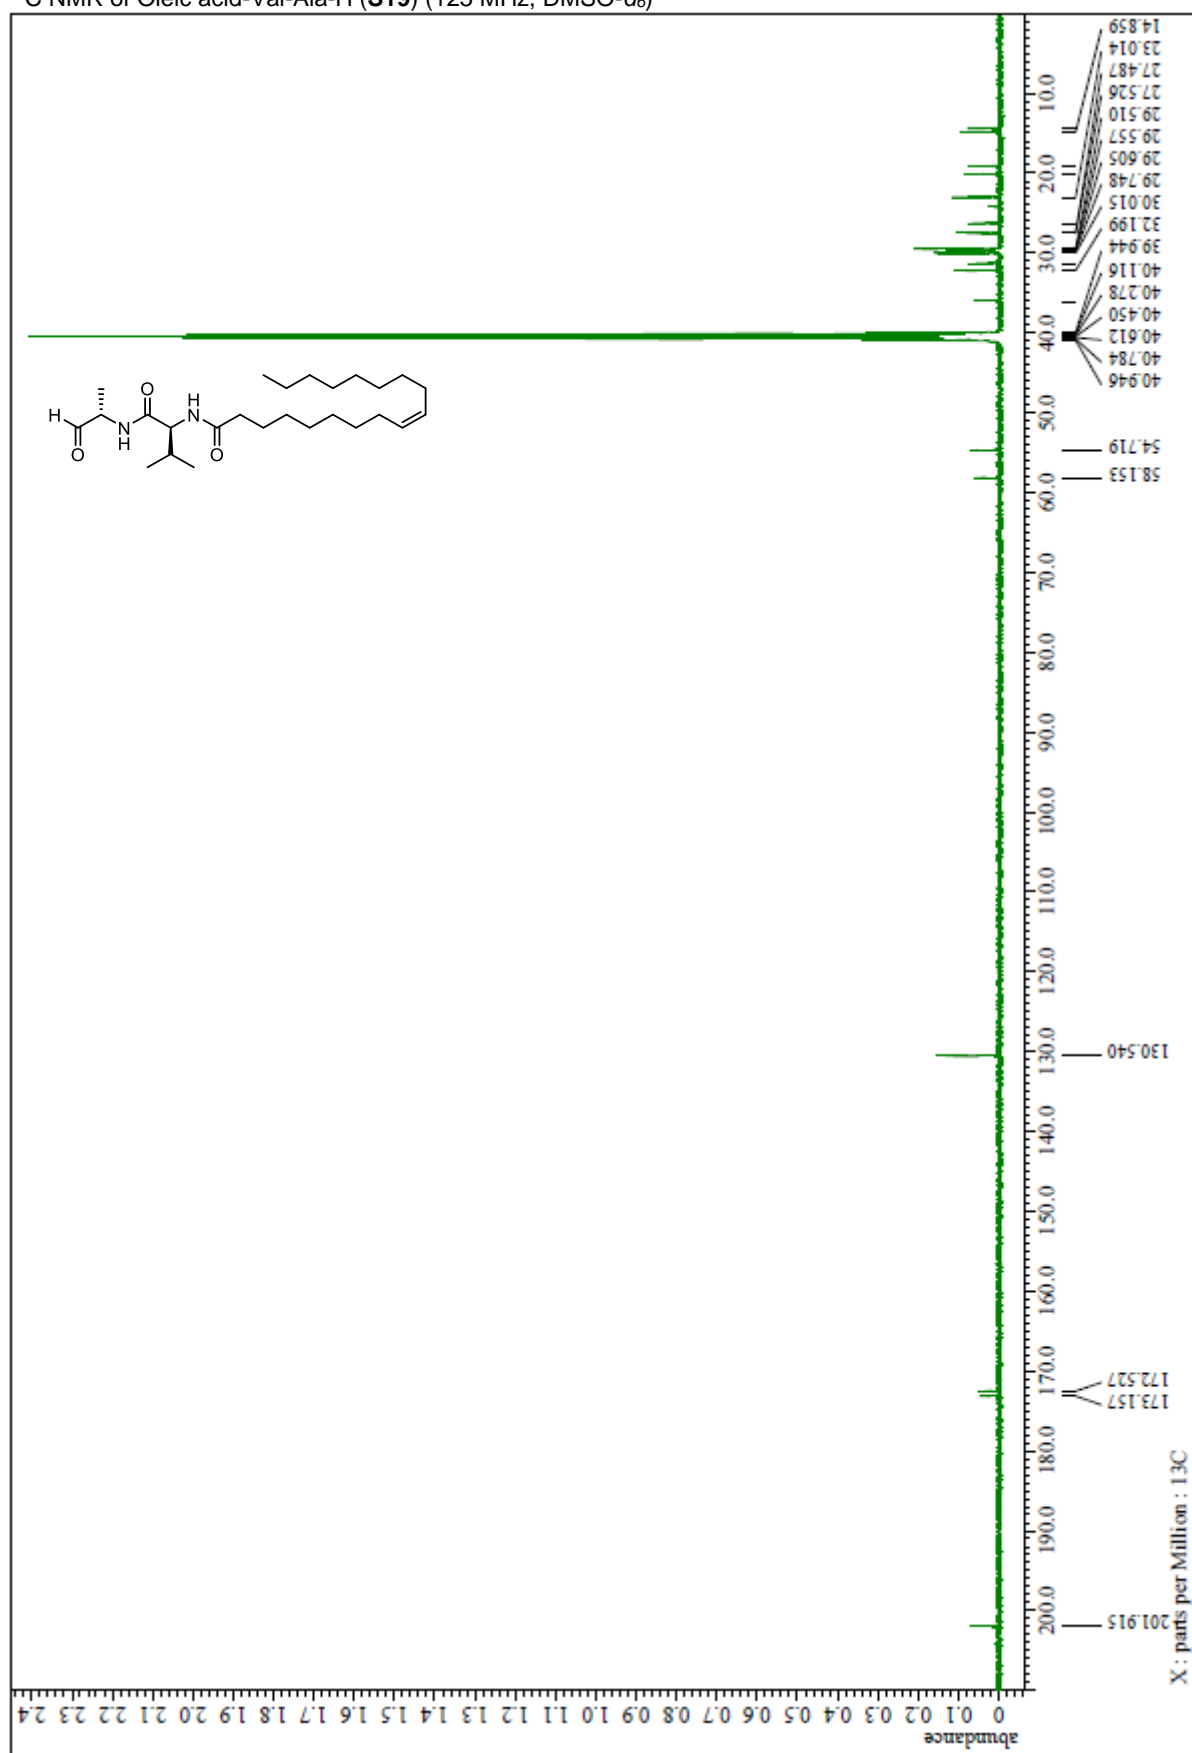

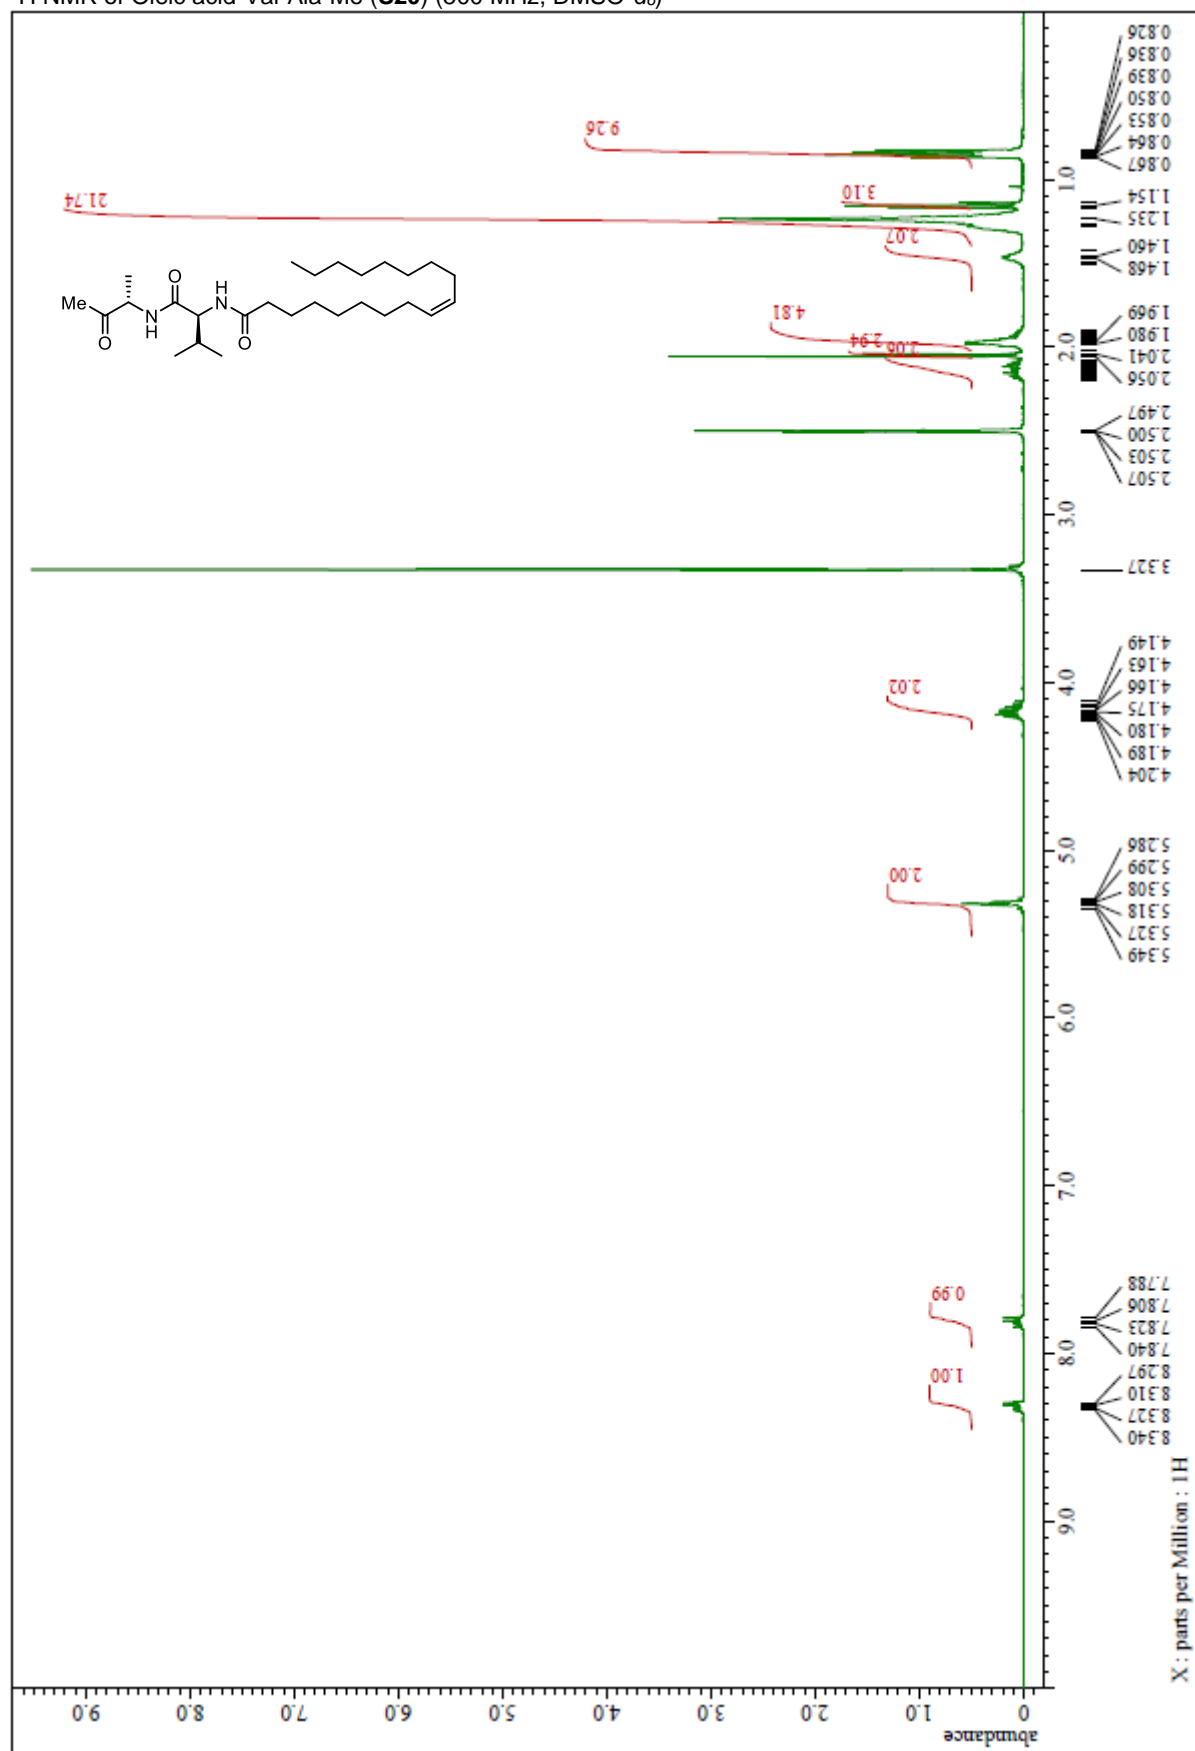

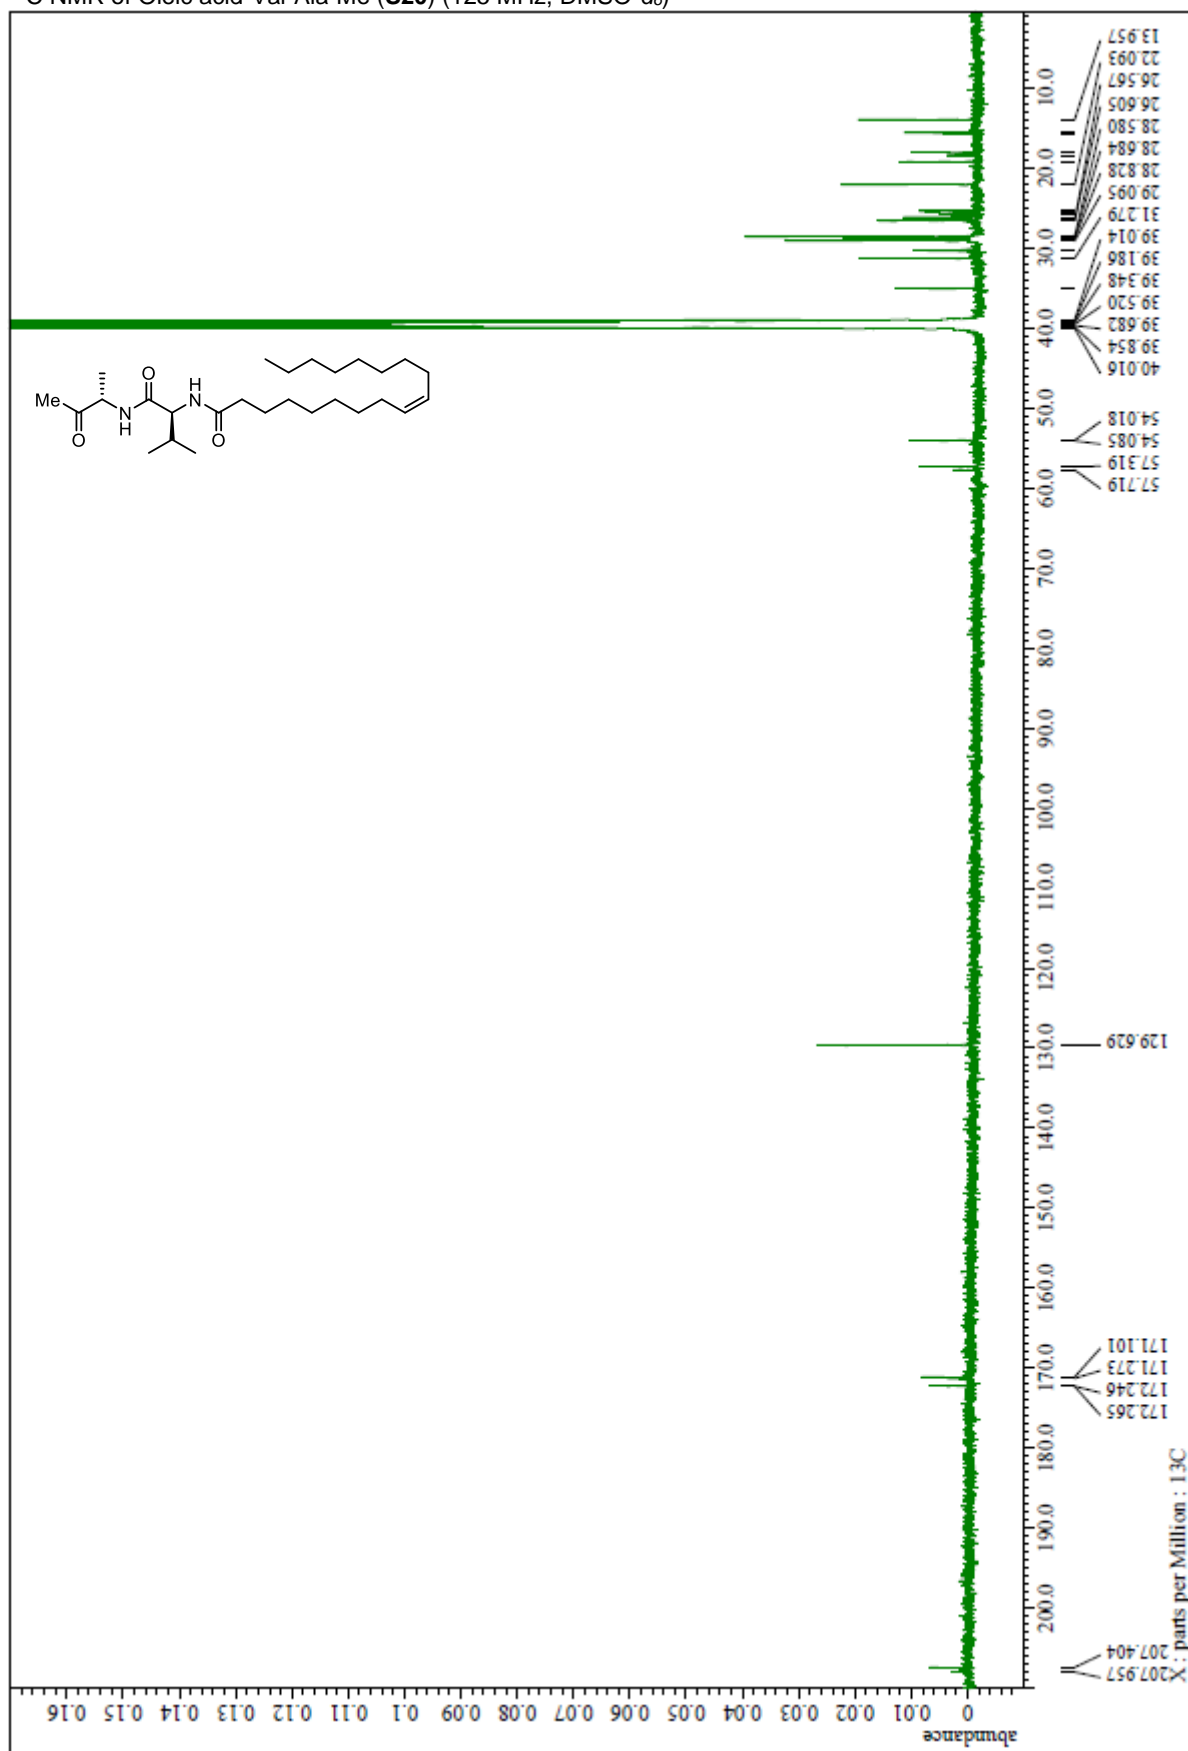

$^1\text{H}$  NMR of Fmoc-Ala-(Me)N-O-TAGb (**S23**) (500 MHz,  $\text{CDCl}_3$ )

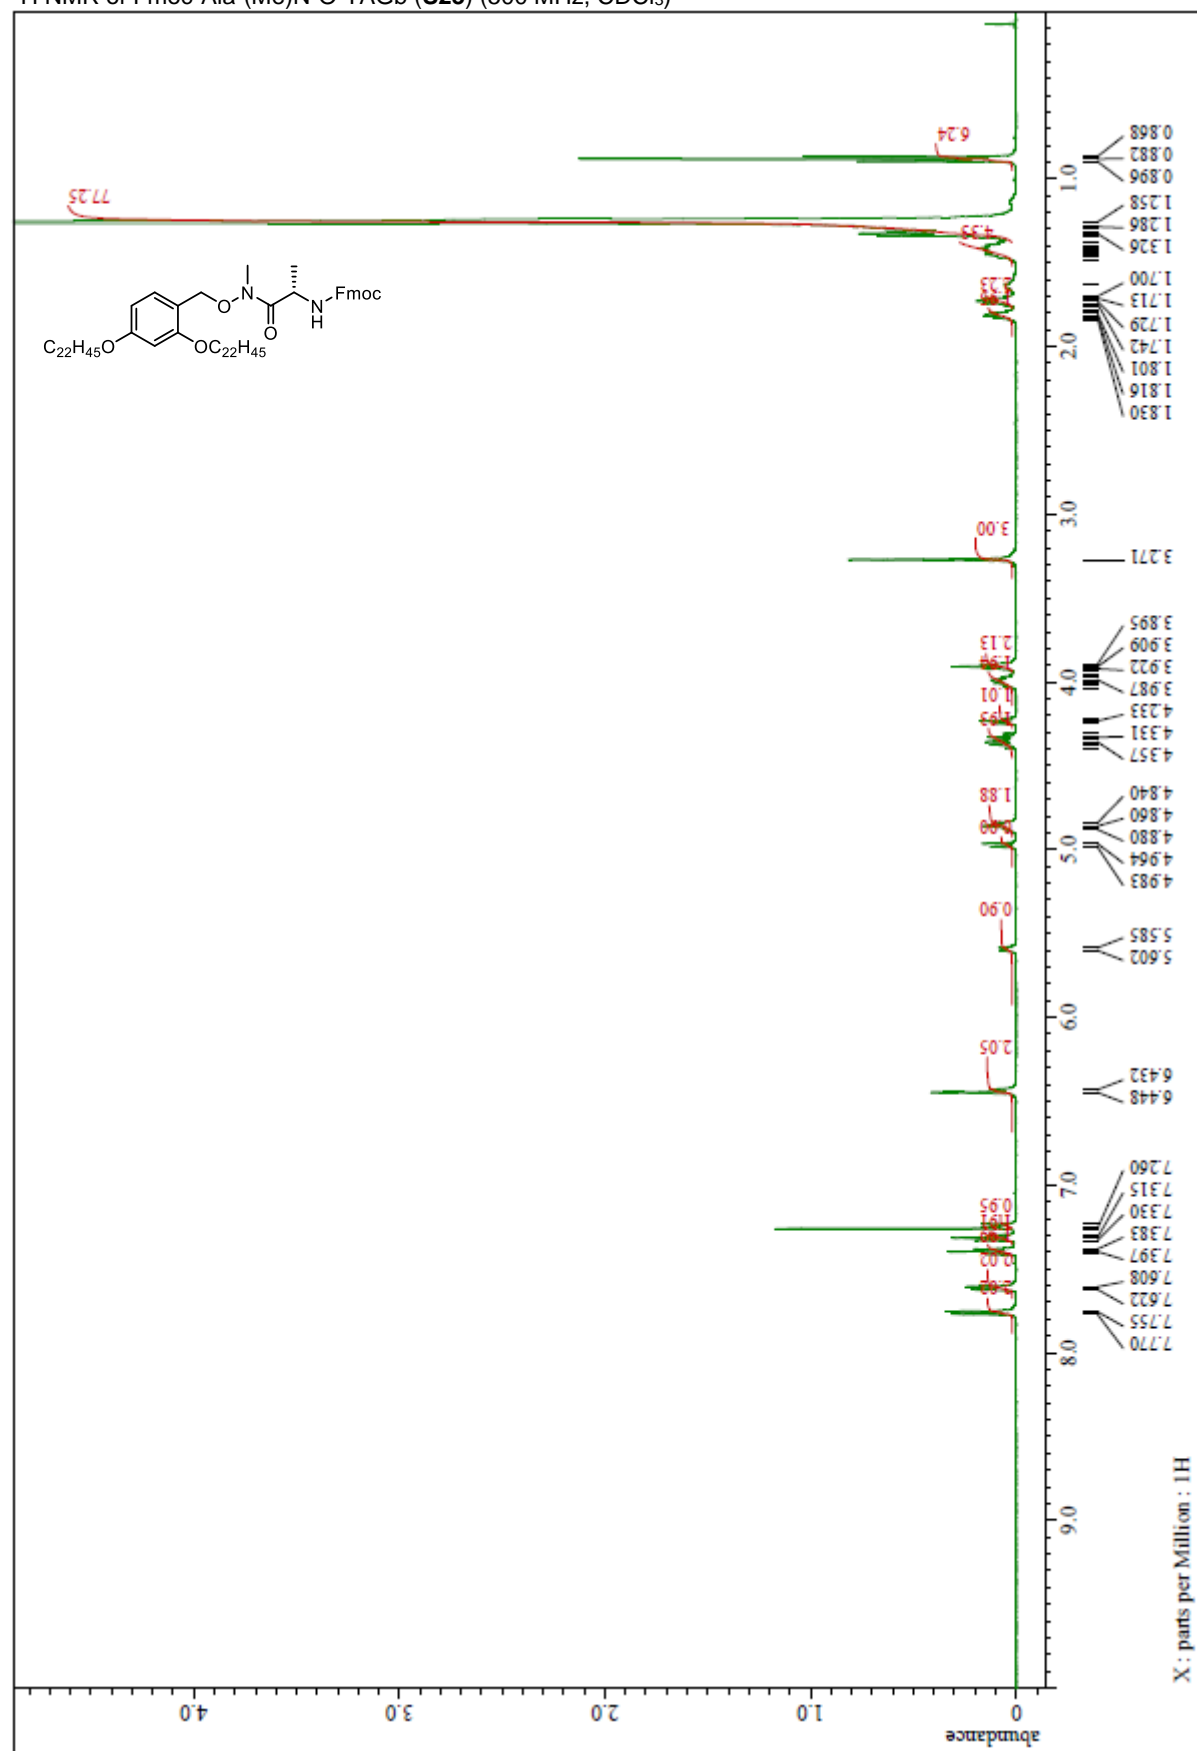

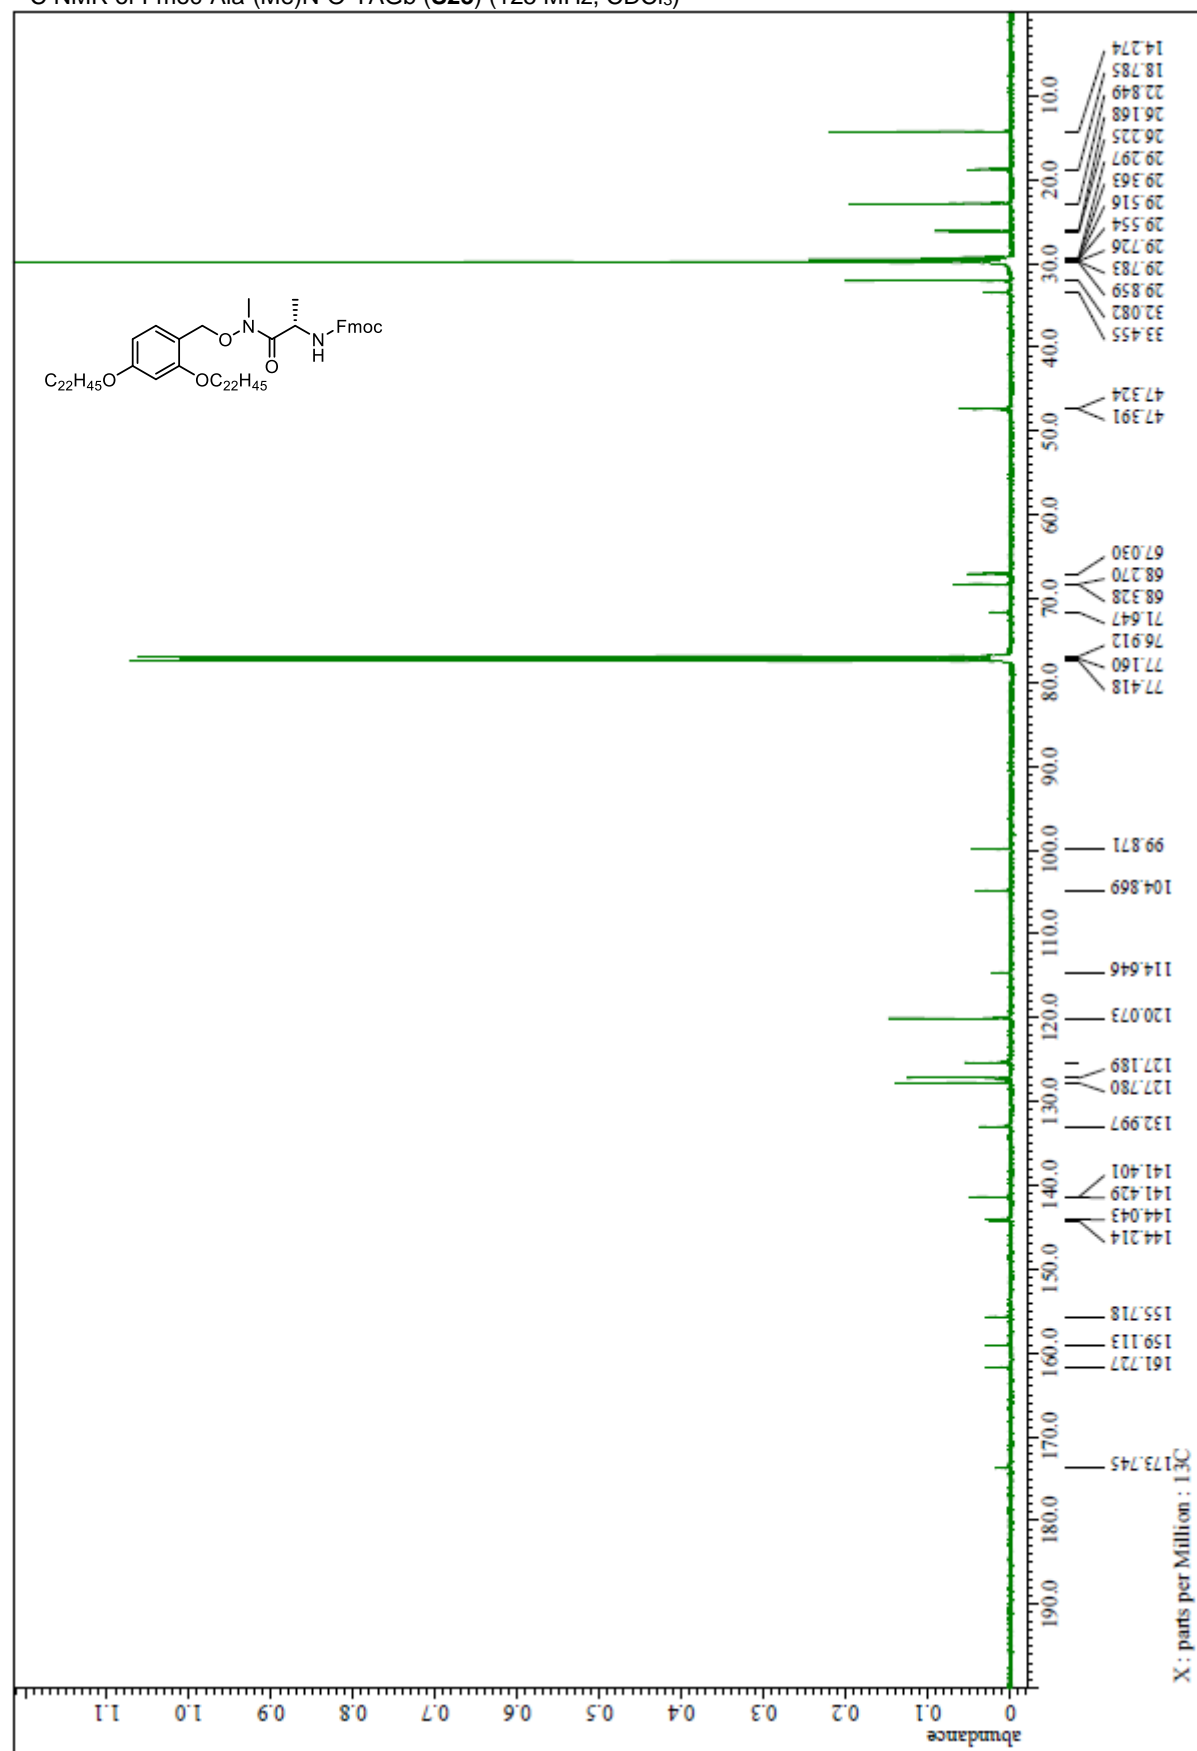

$^1\text{H}$  NMR of Ala-(Me)N-O-TAGb (**S24**) (500 MHz,  $\text{CDCl}_3$ )

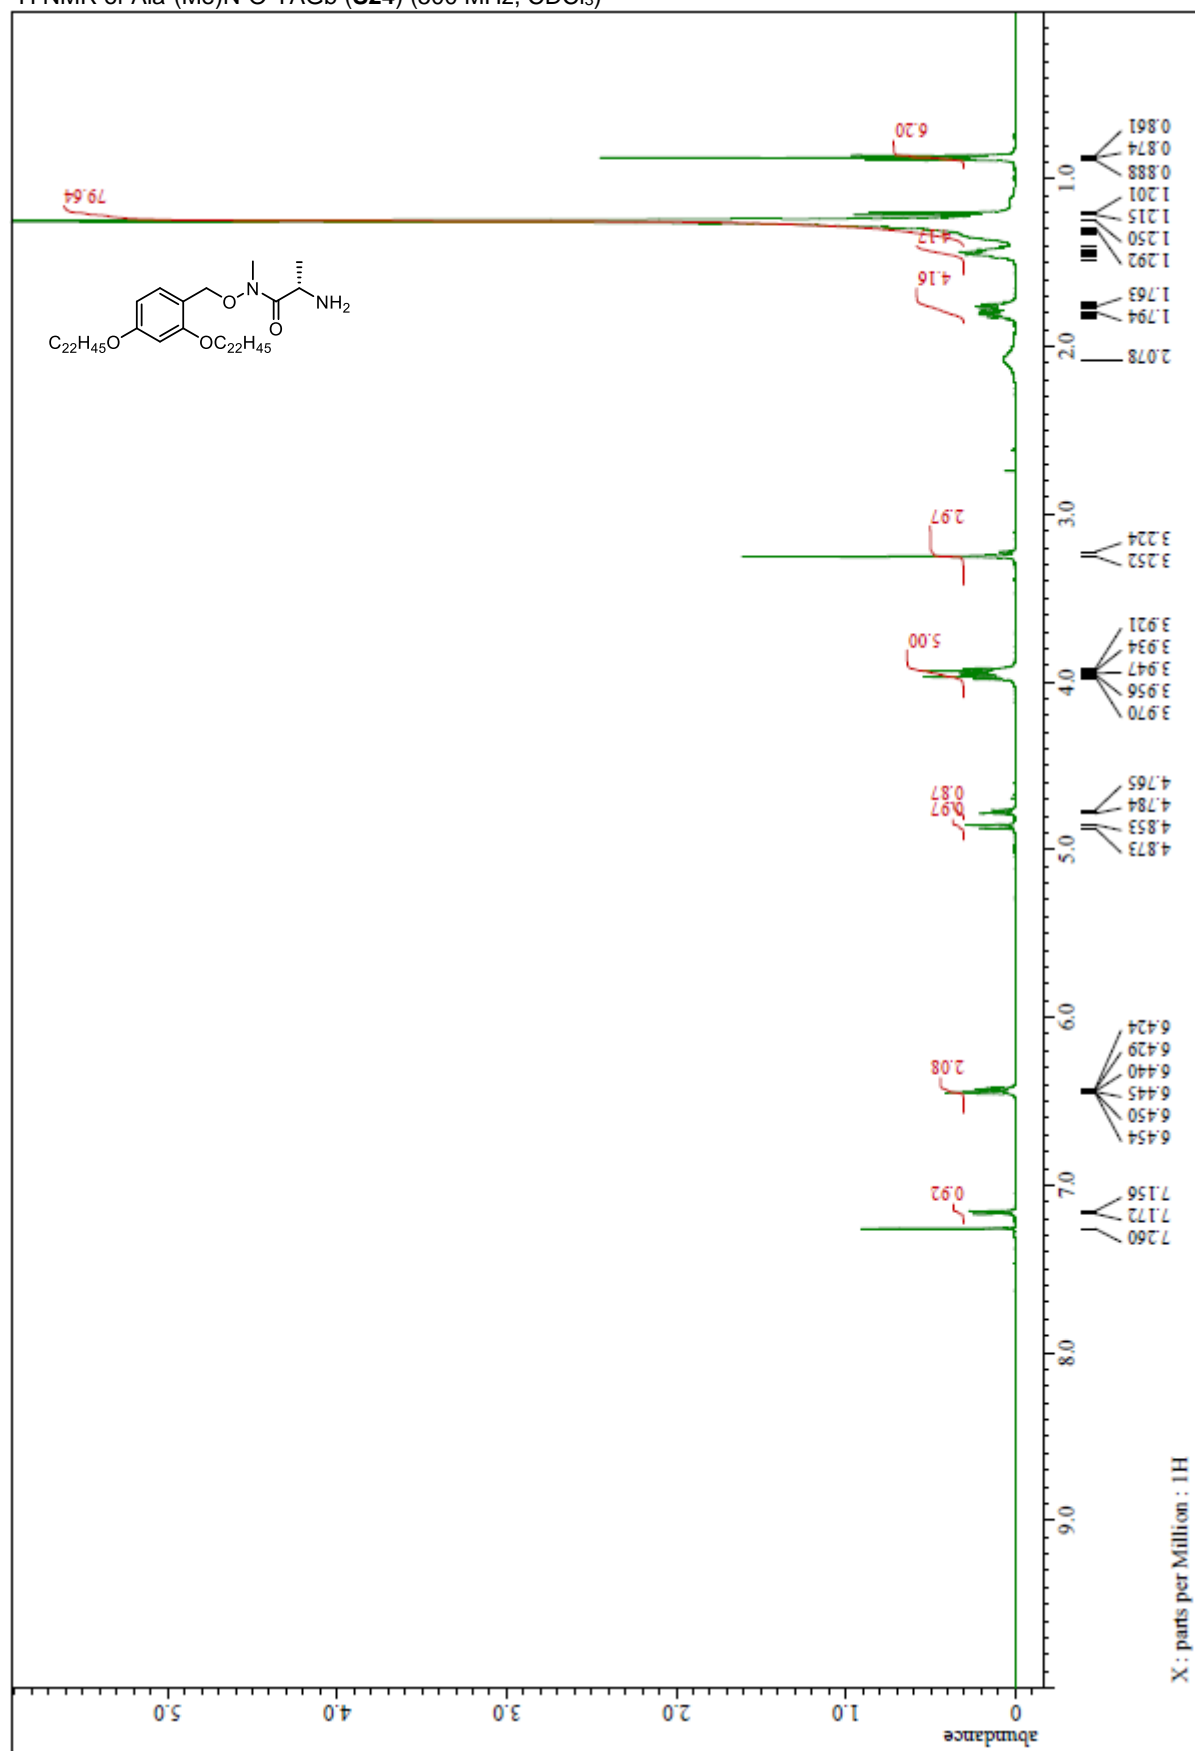

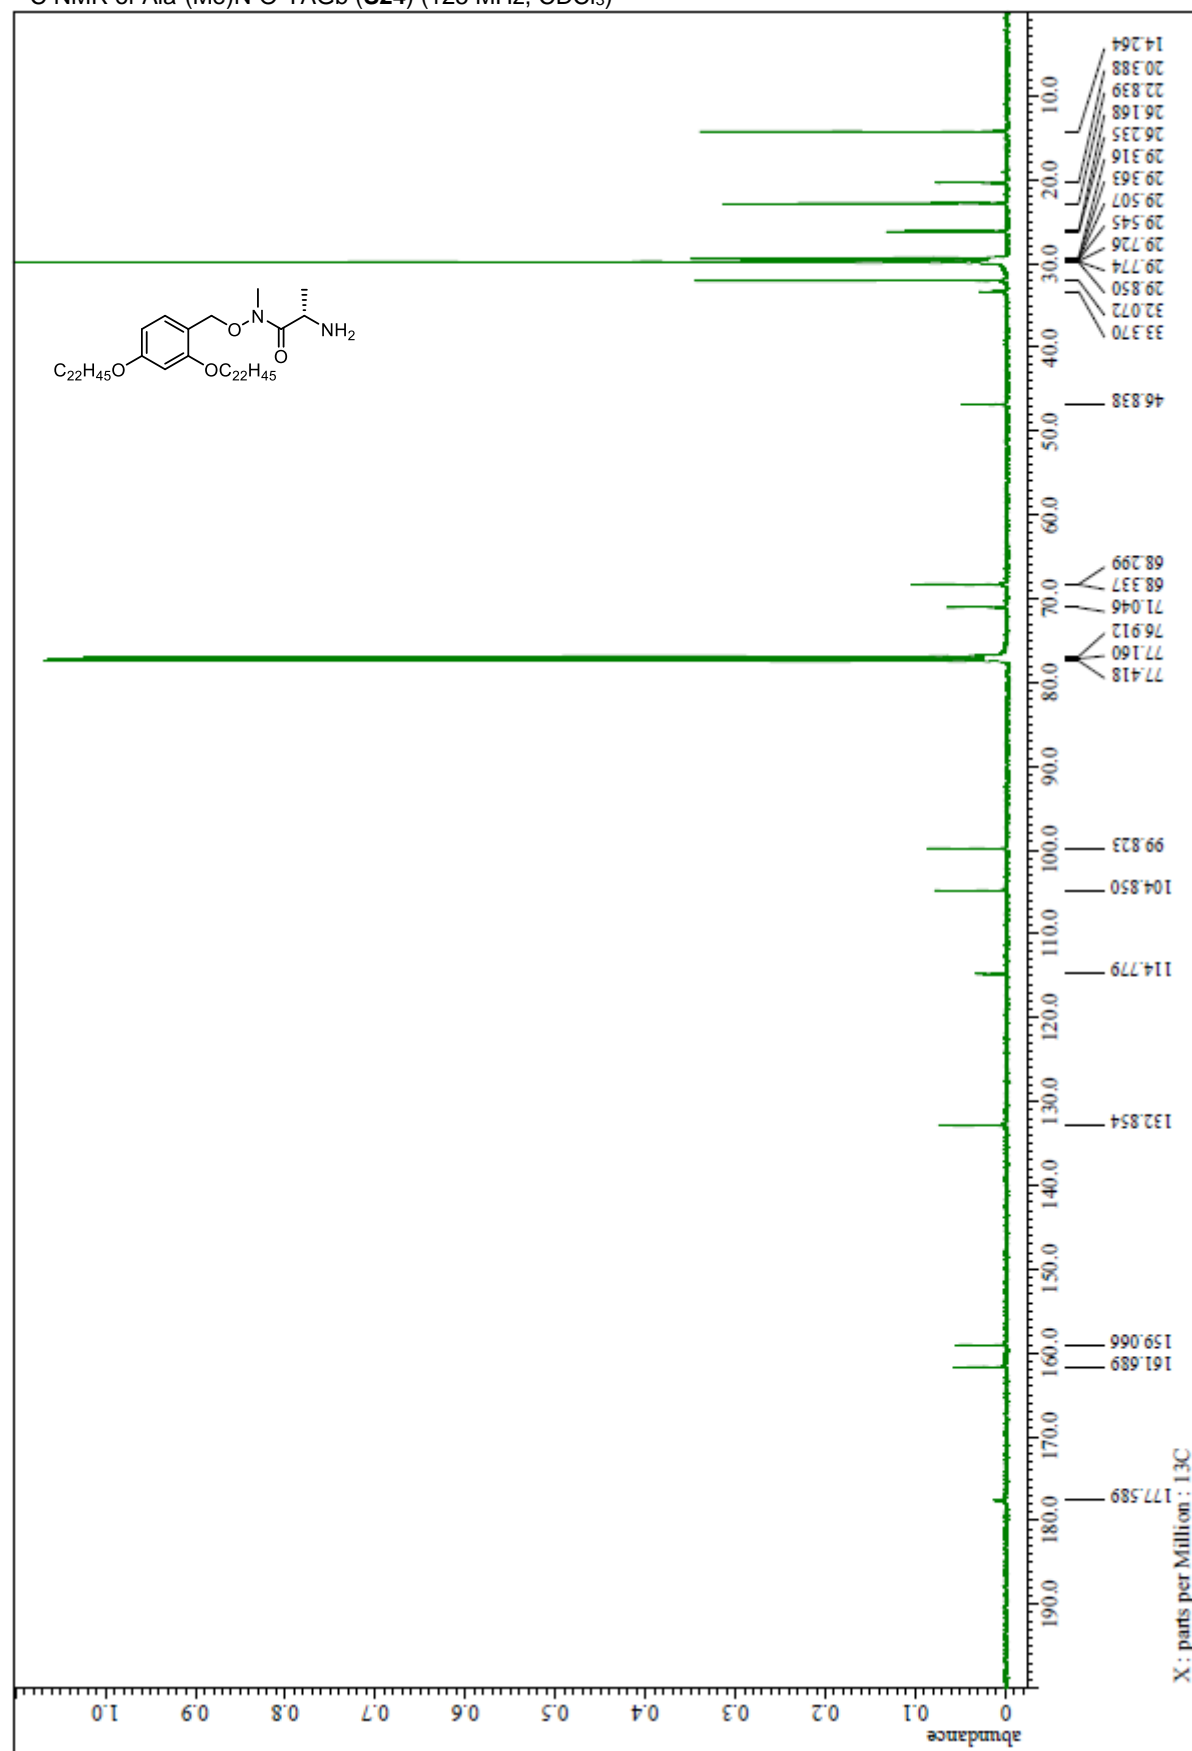

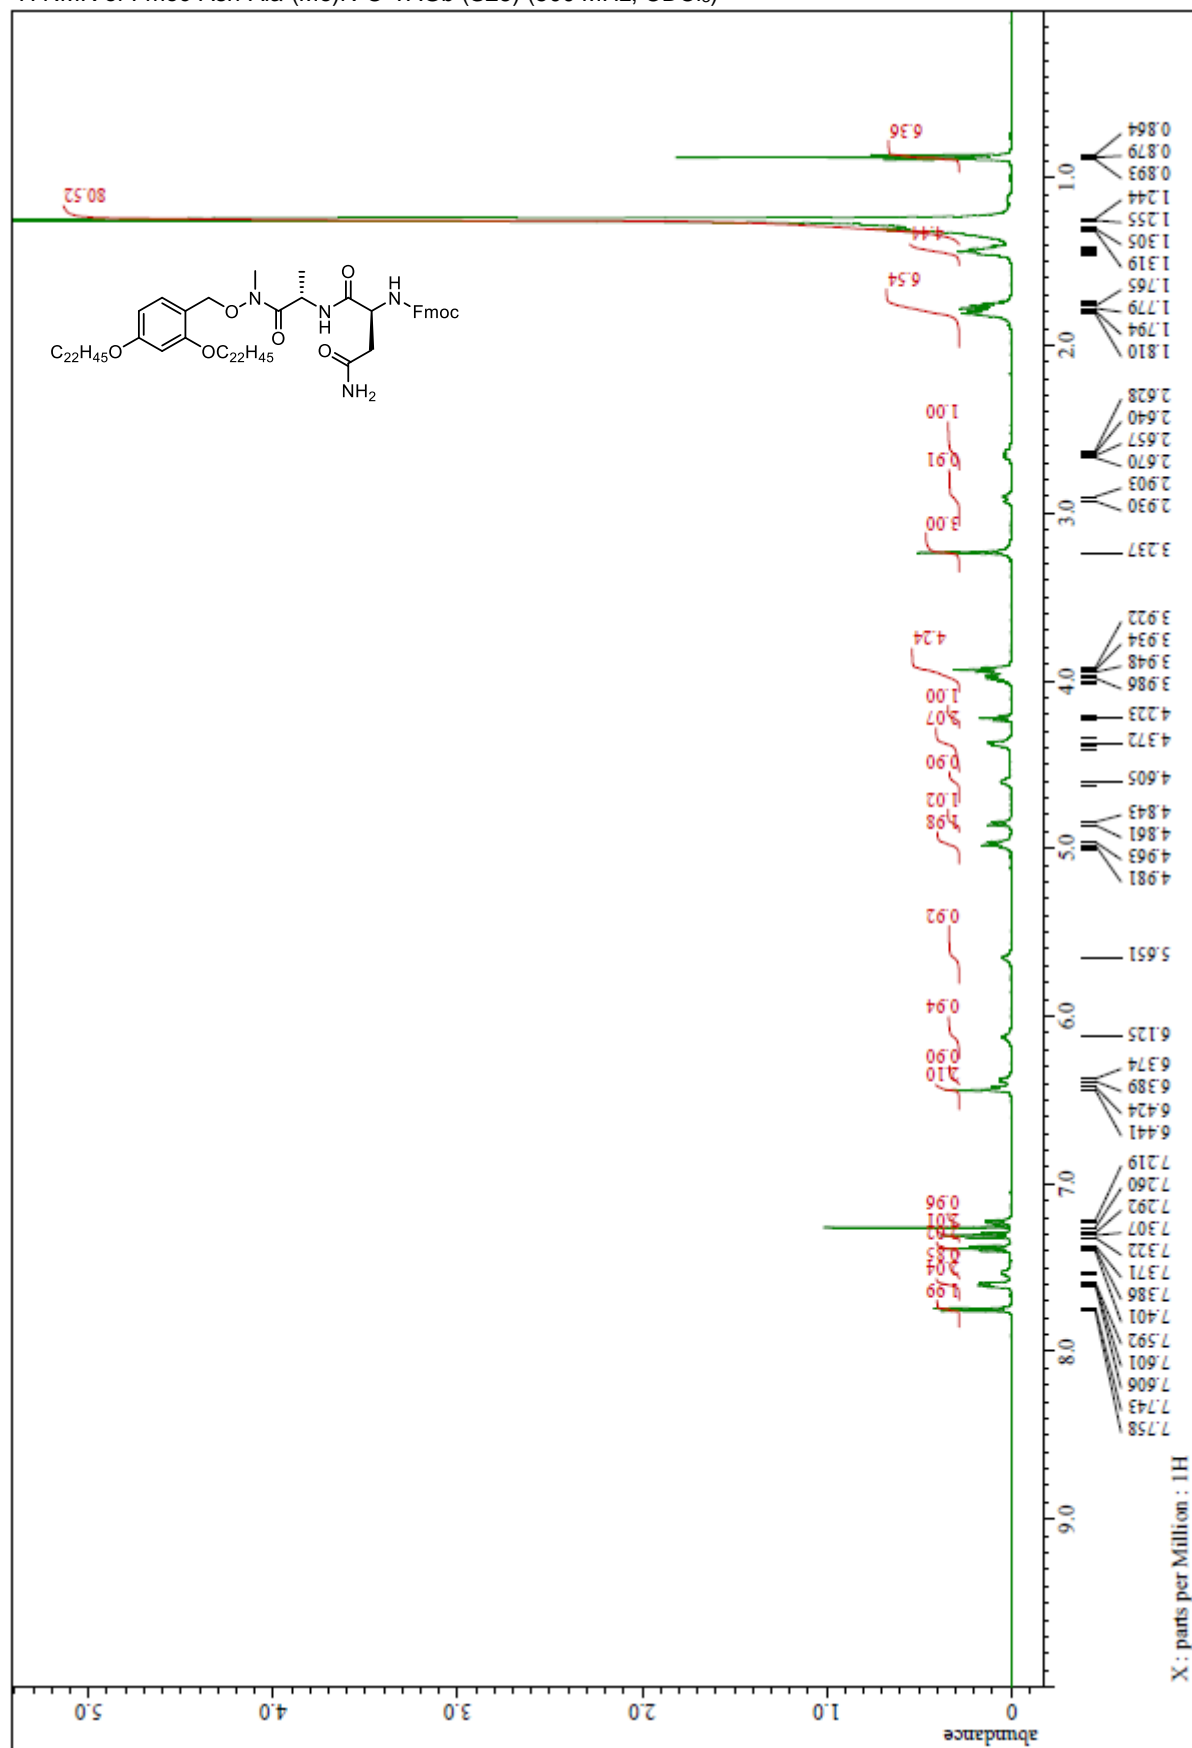



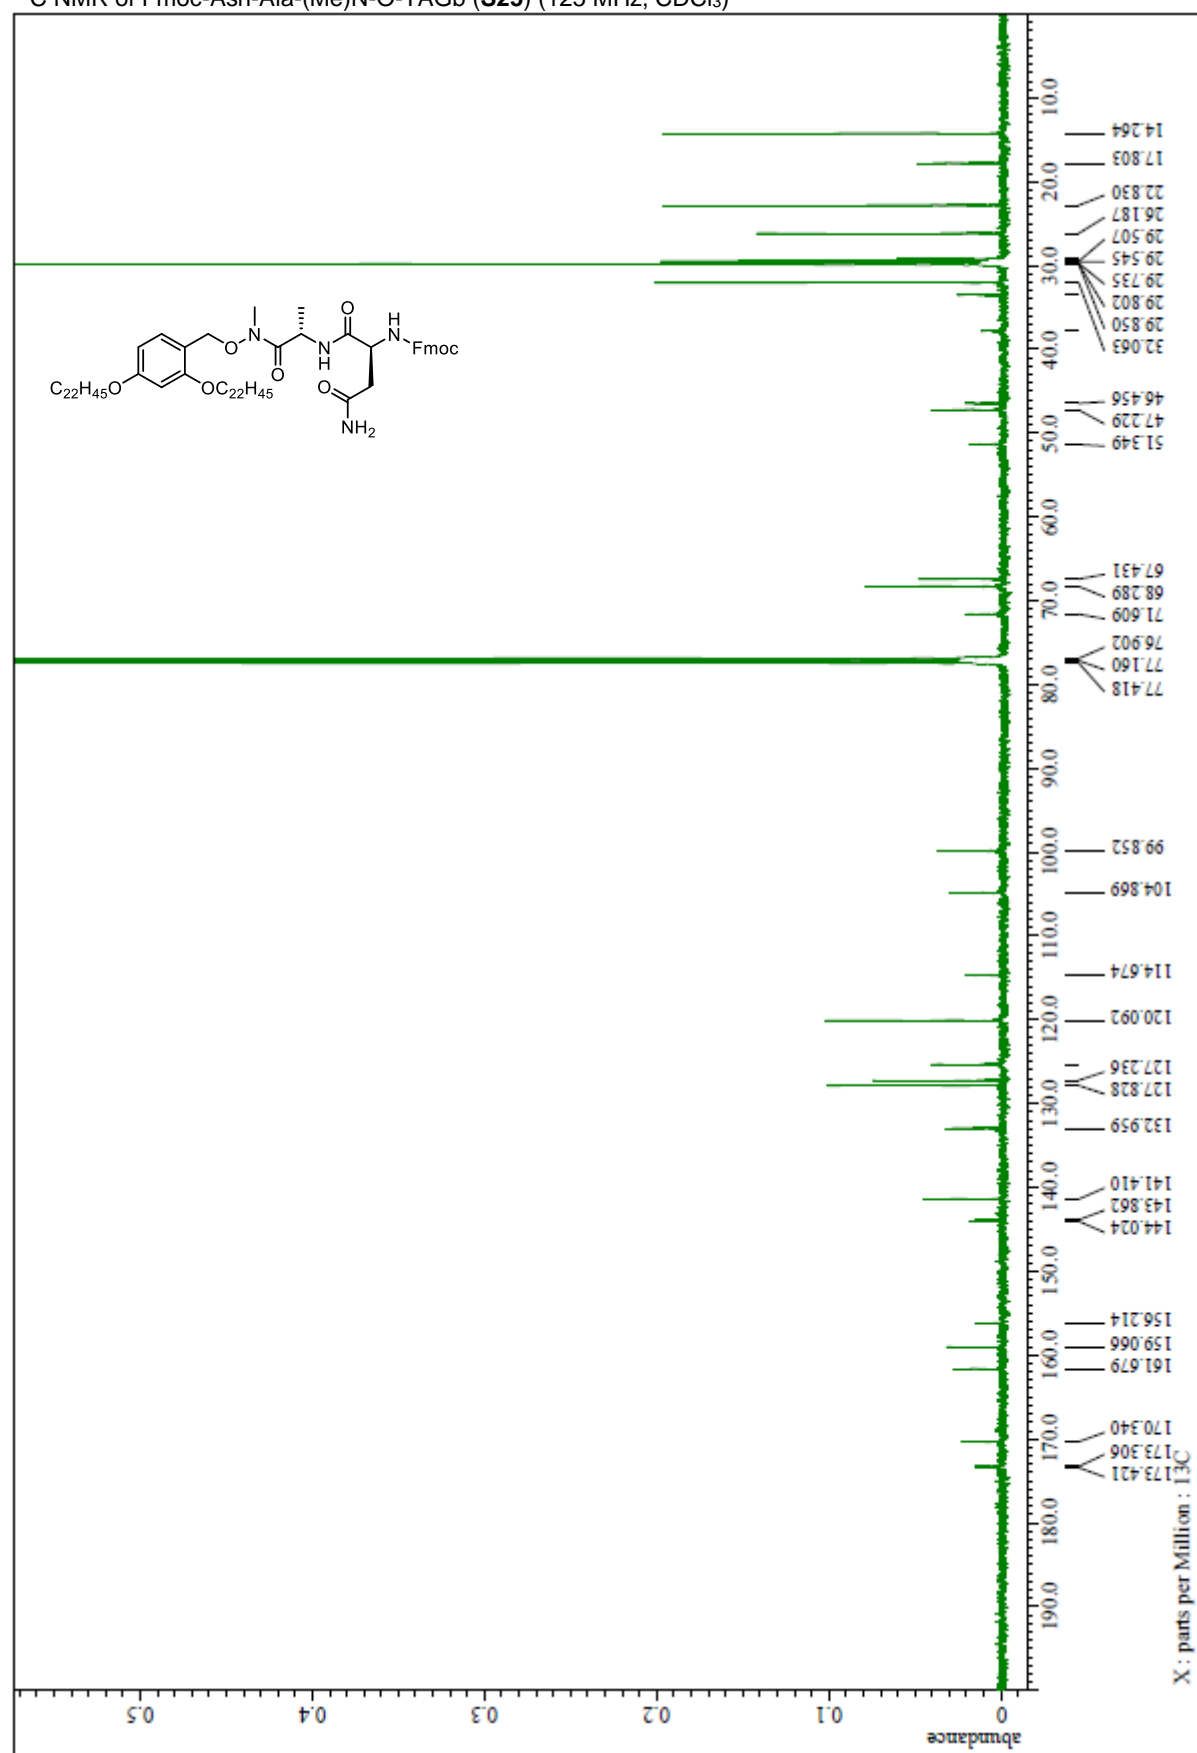

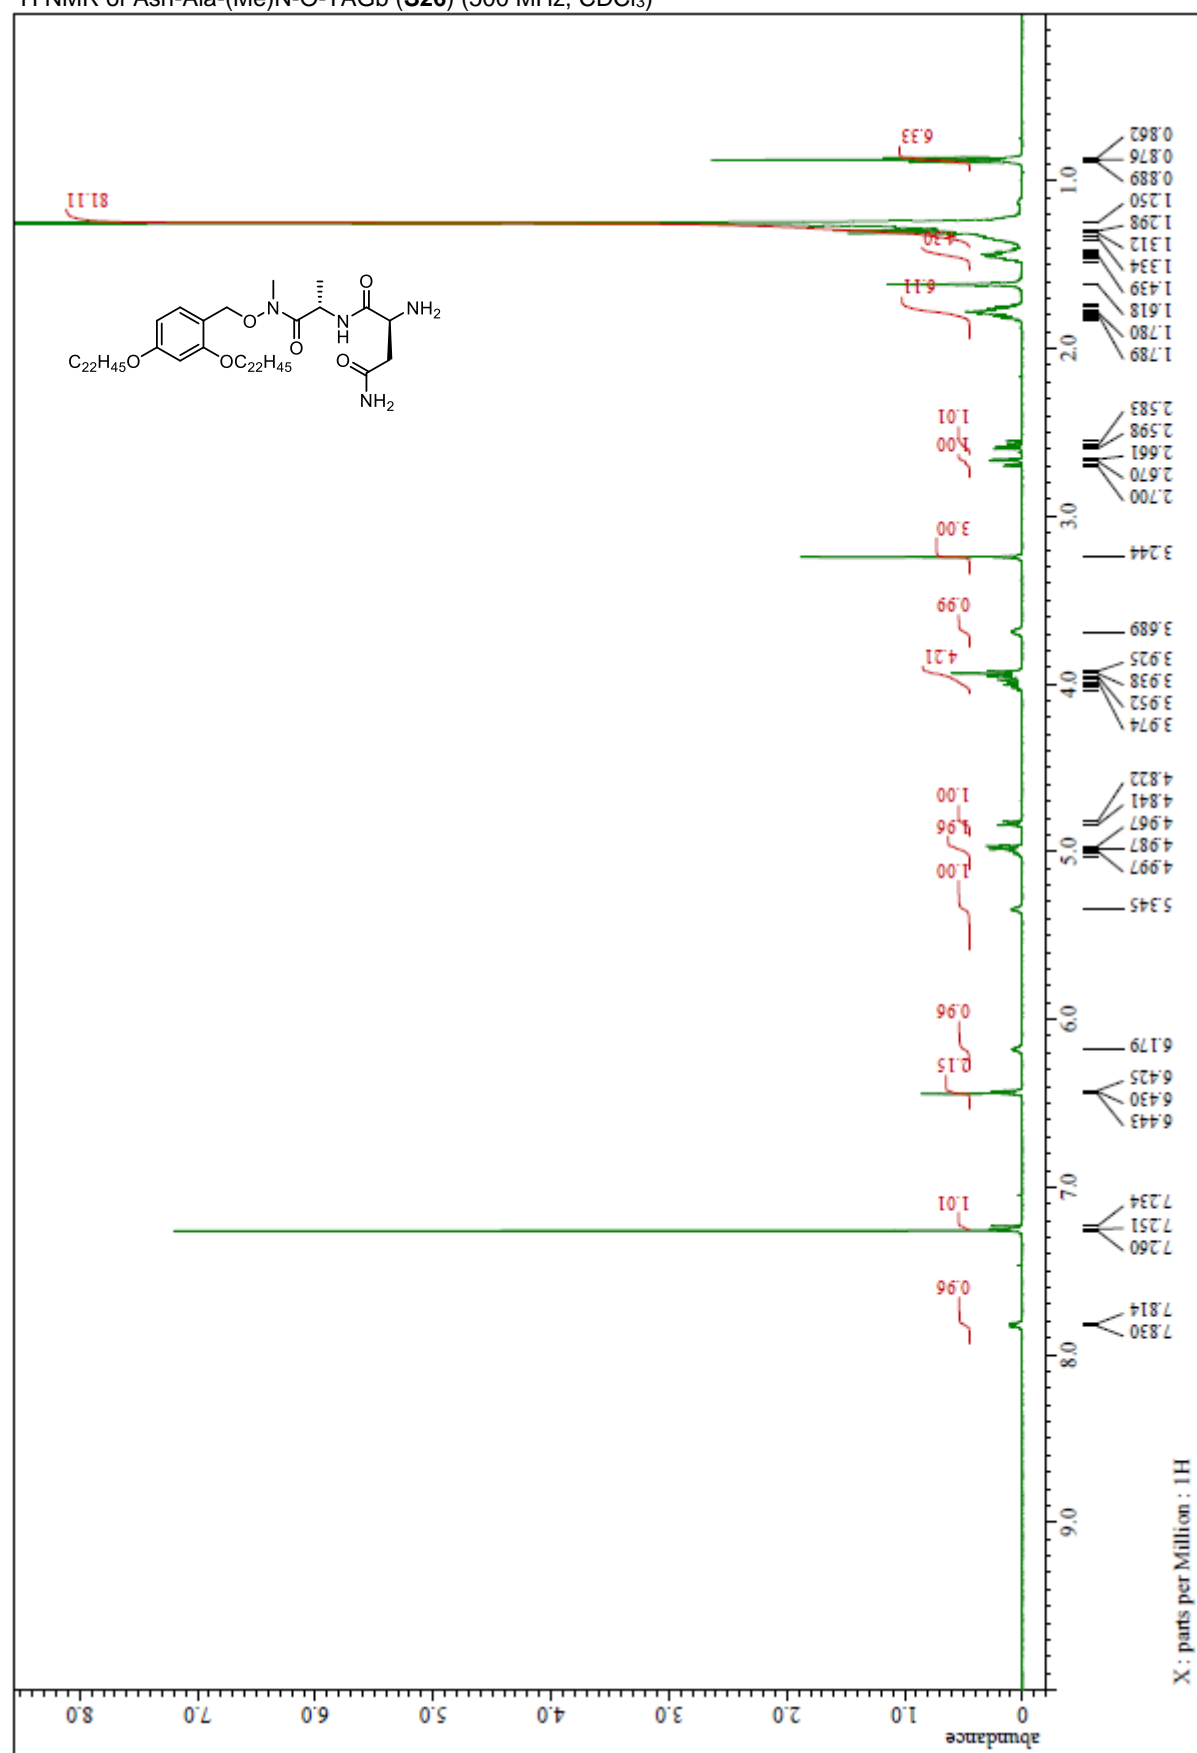

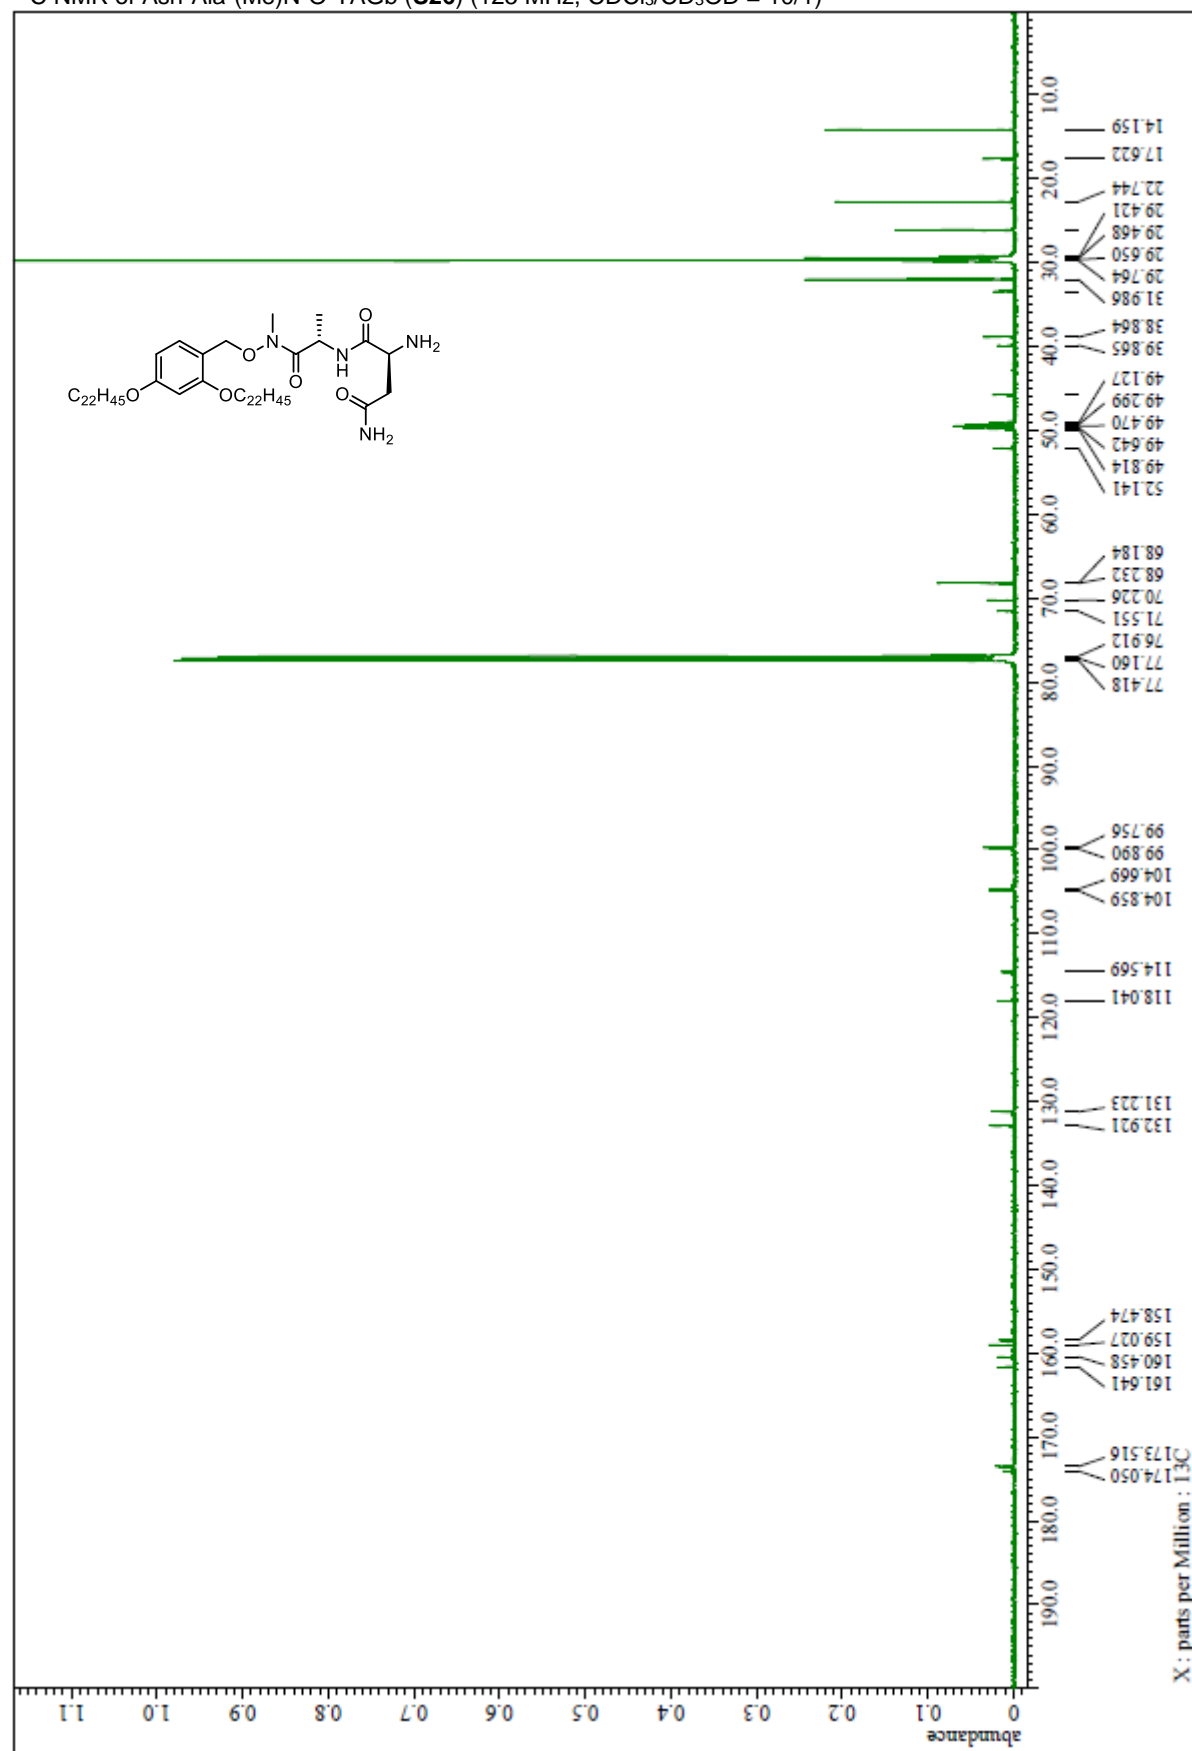

$^1\text{H}$  NMR of Fmoc-Val-Asn-Ala-(Me)N-O-TAGb (**S27**) (500 MHz,  $\text{CDCl}_3$ )

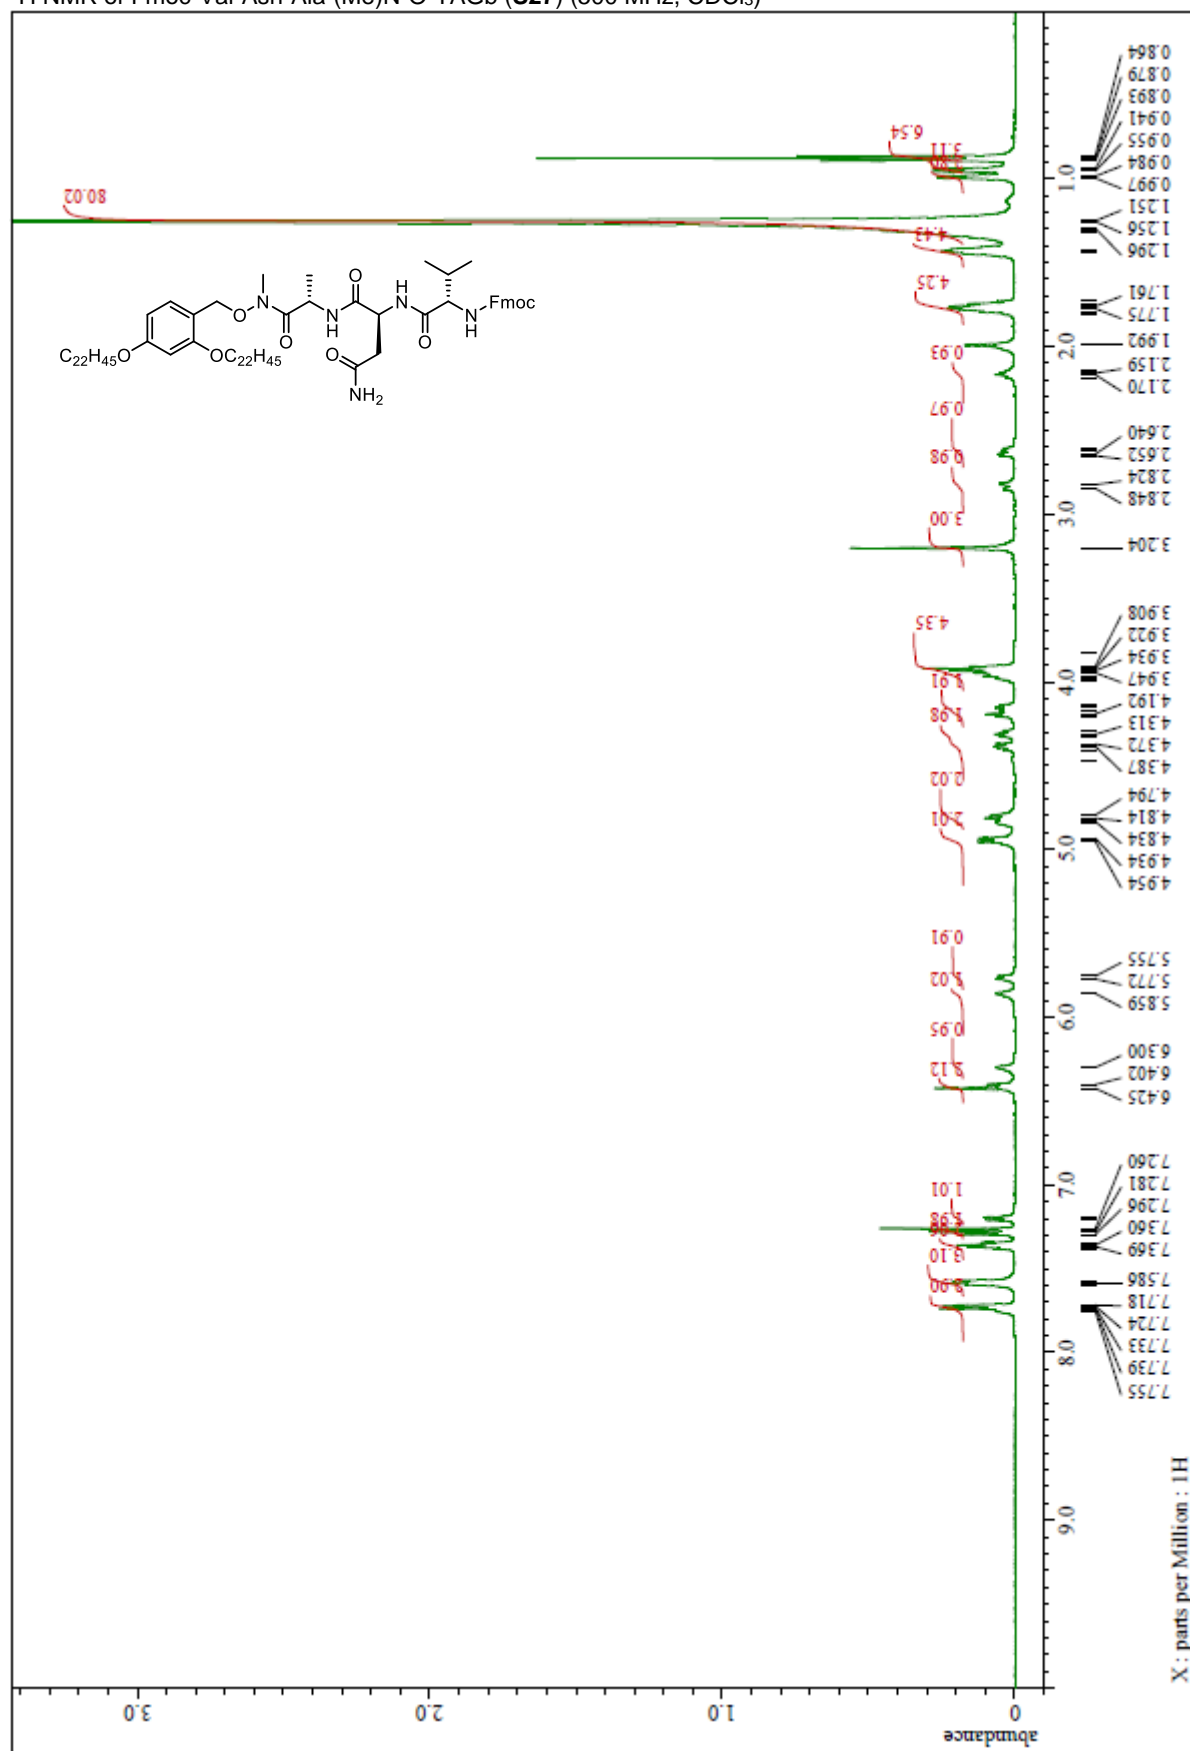

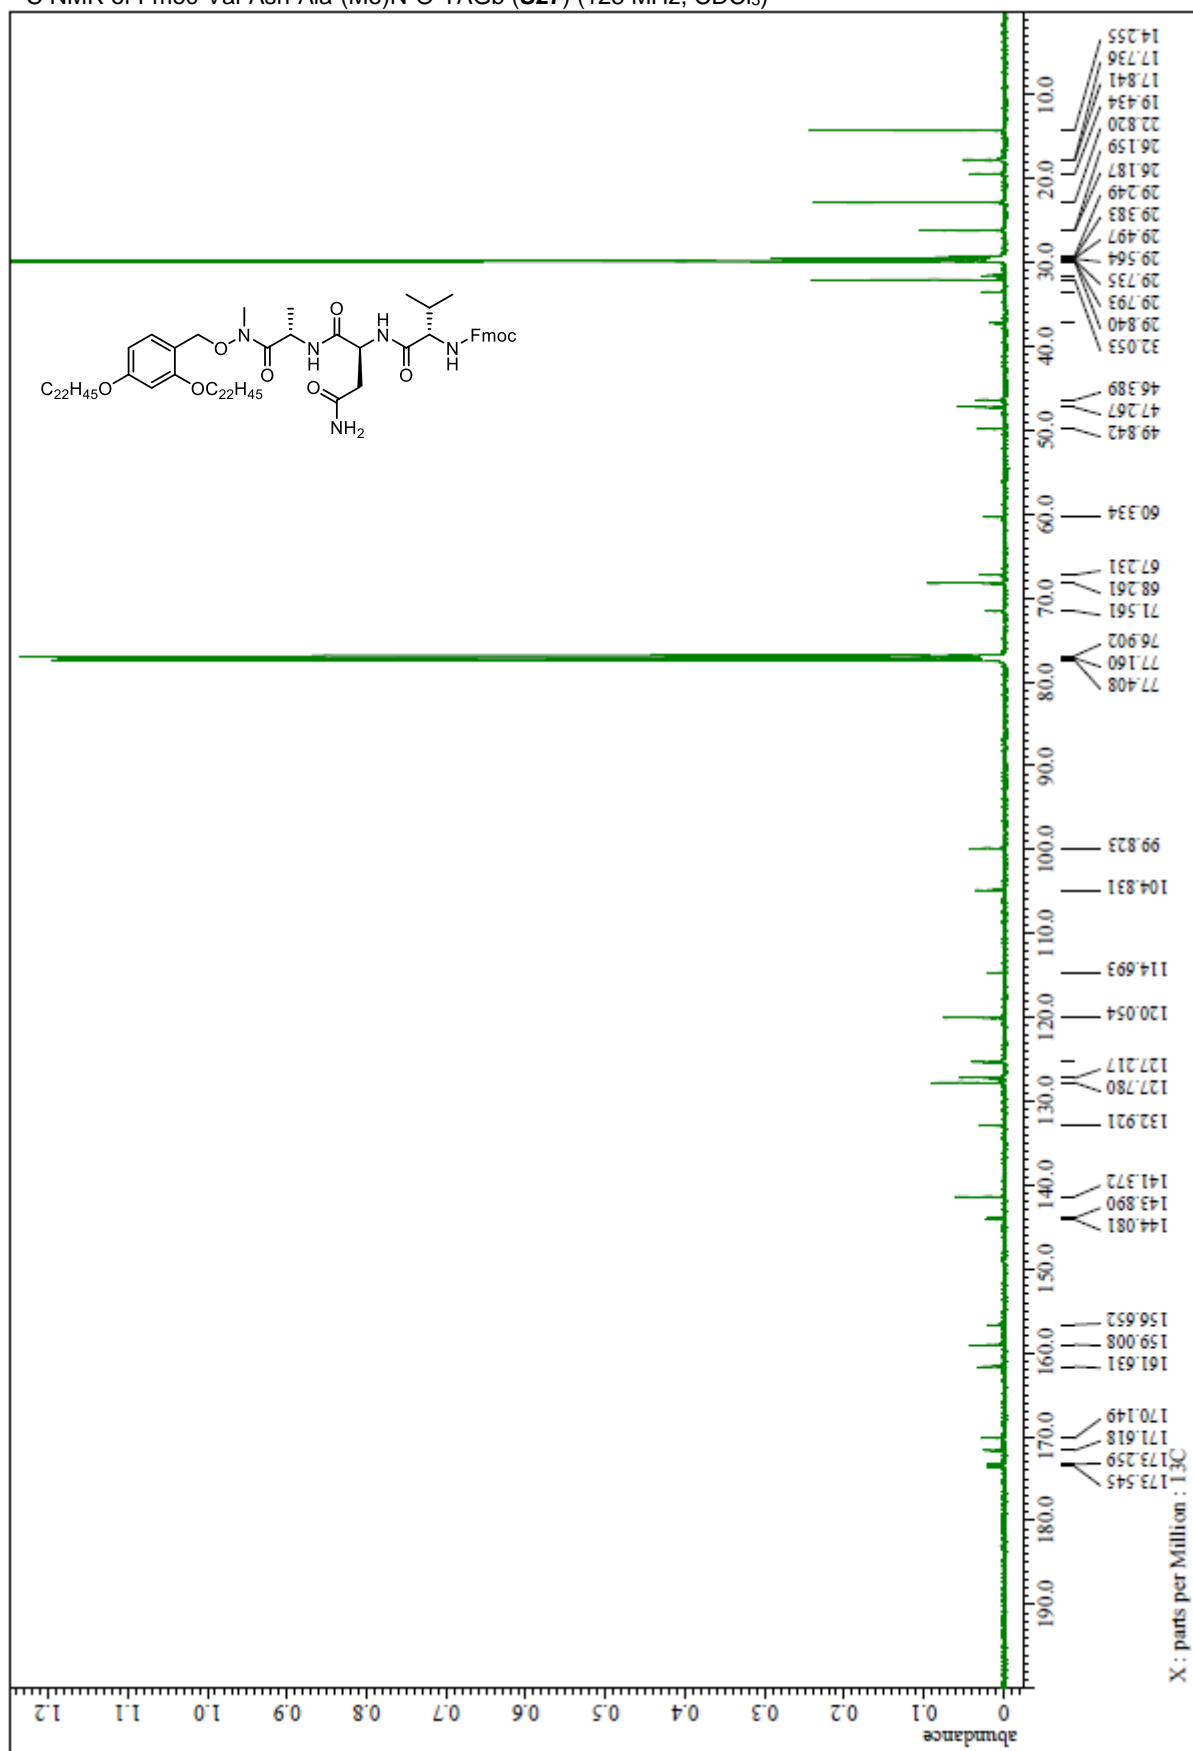

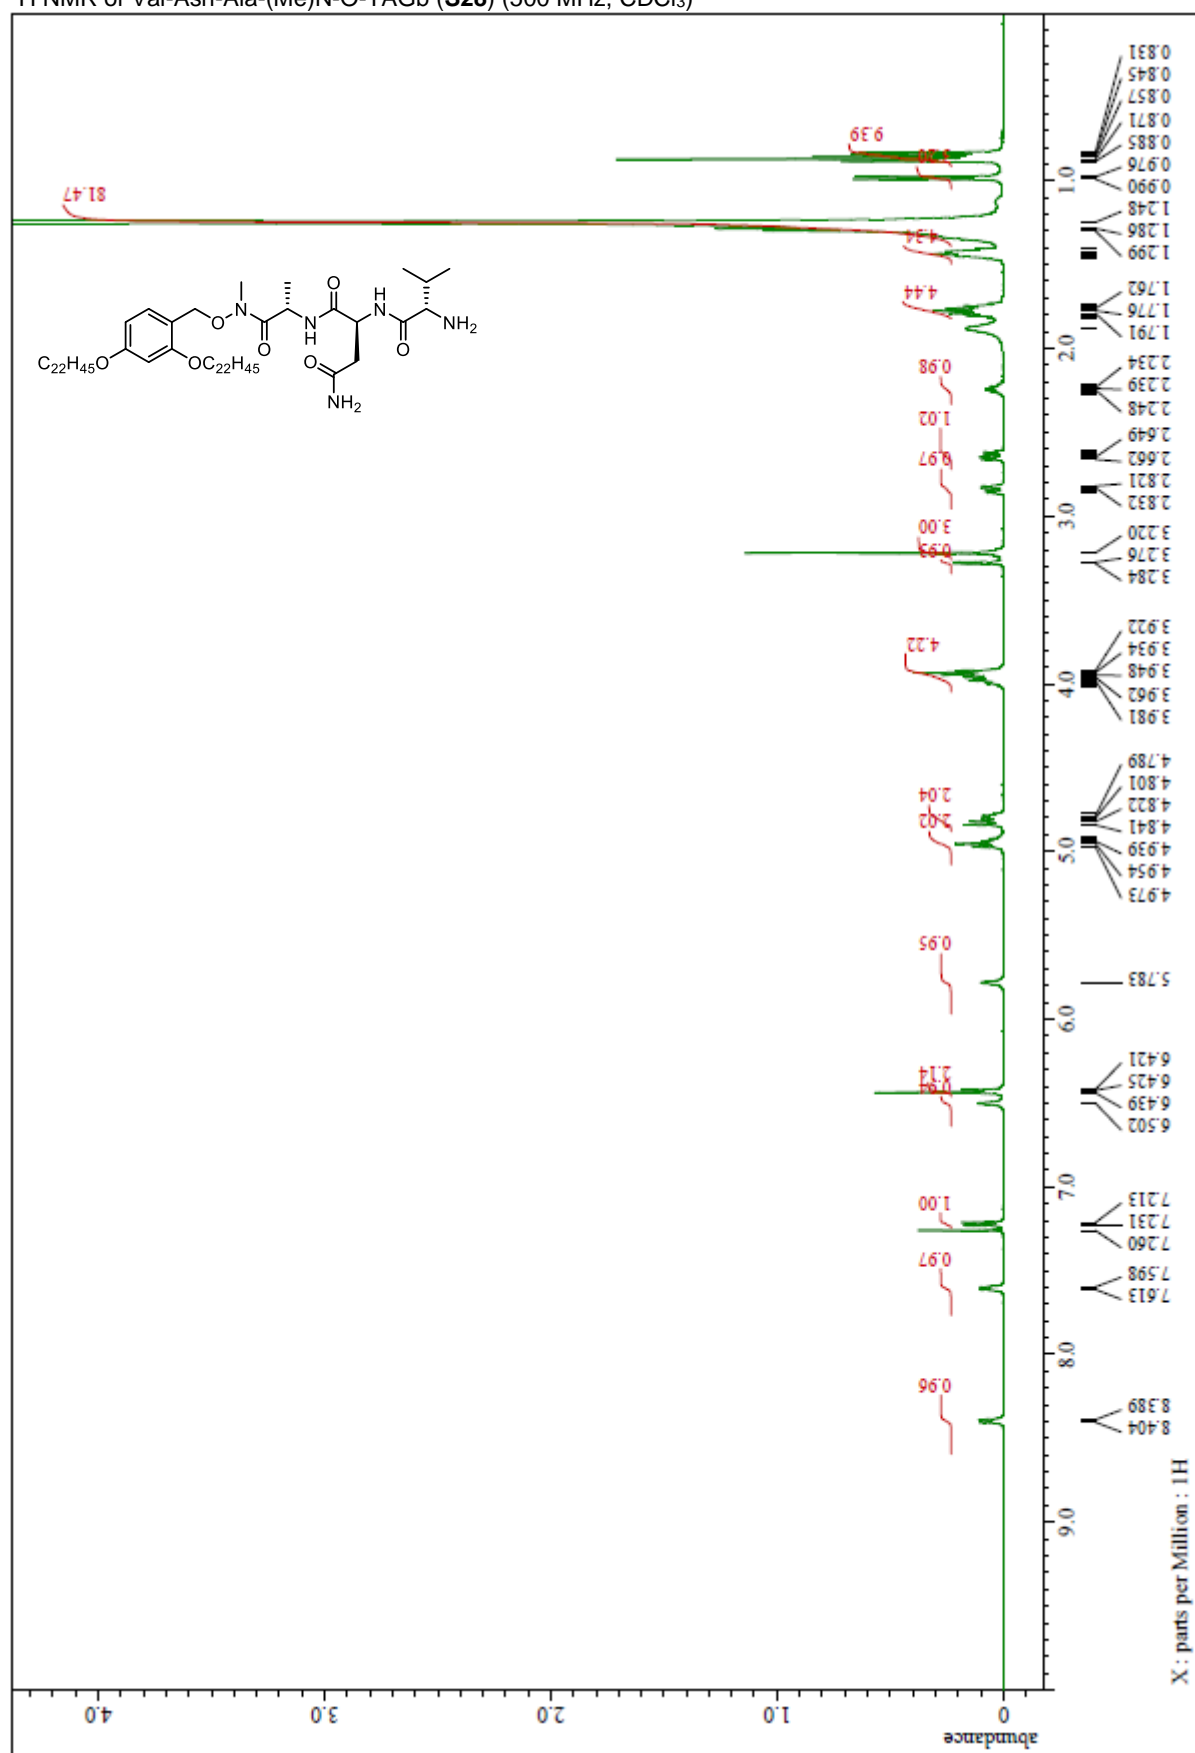

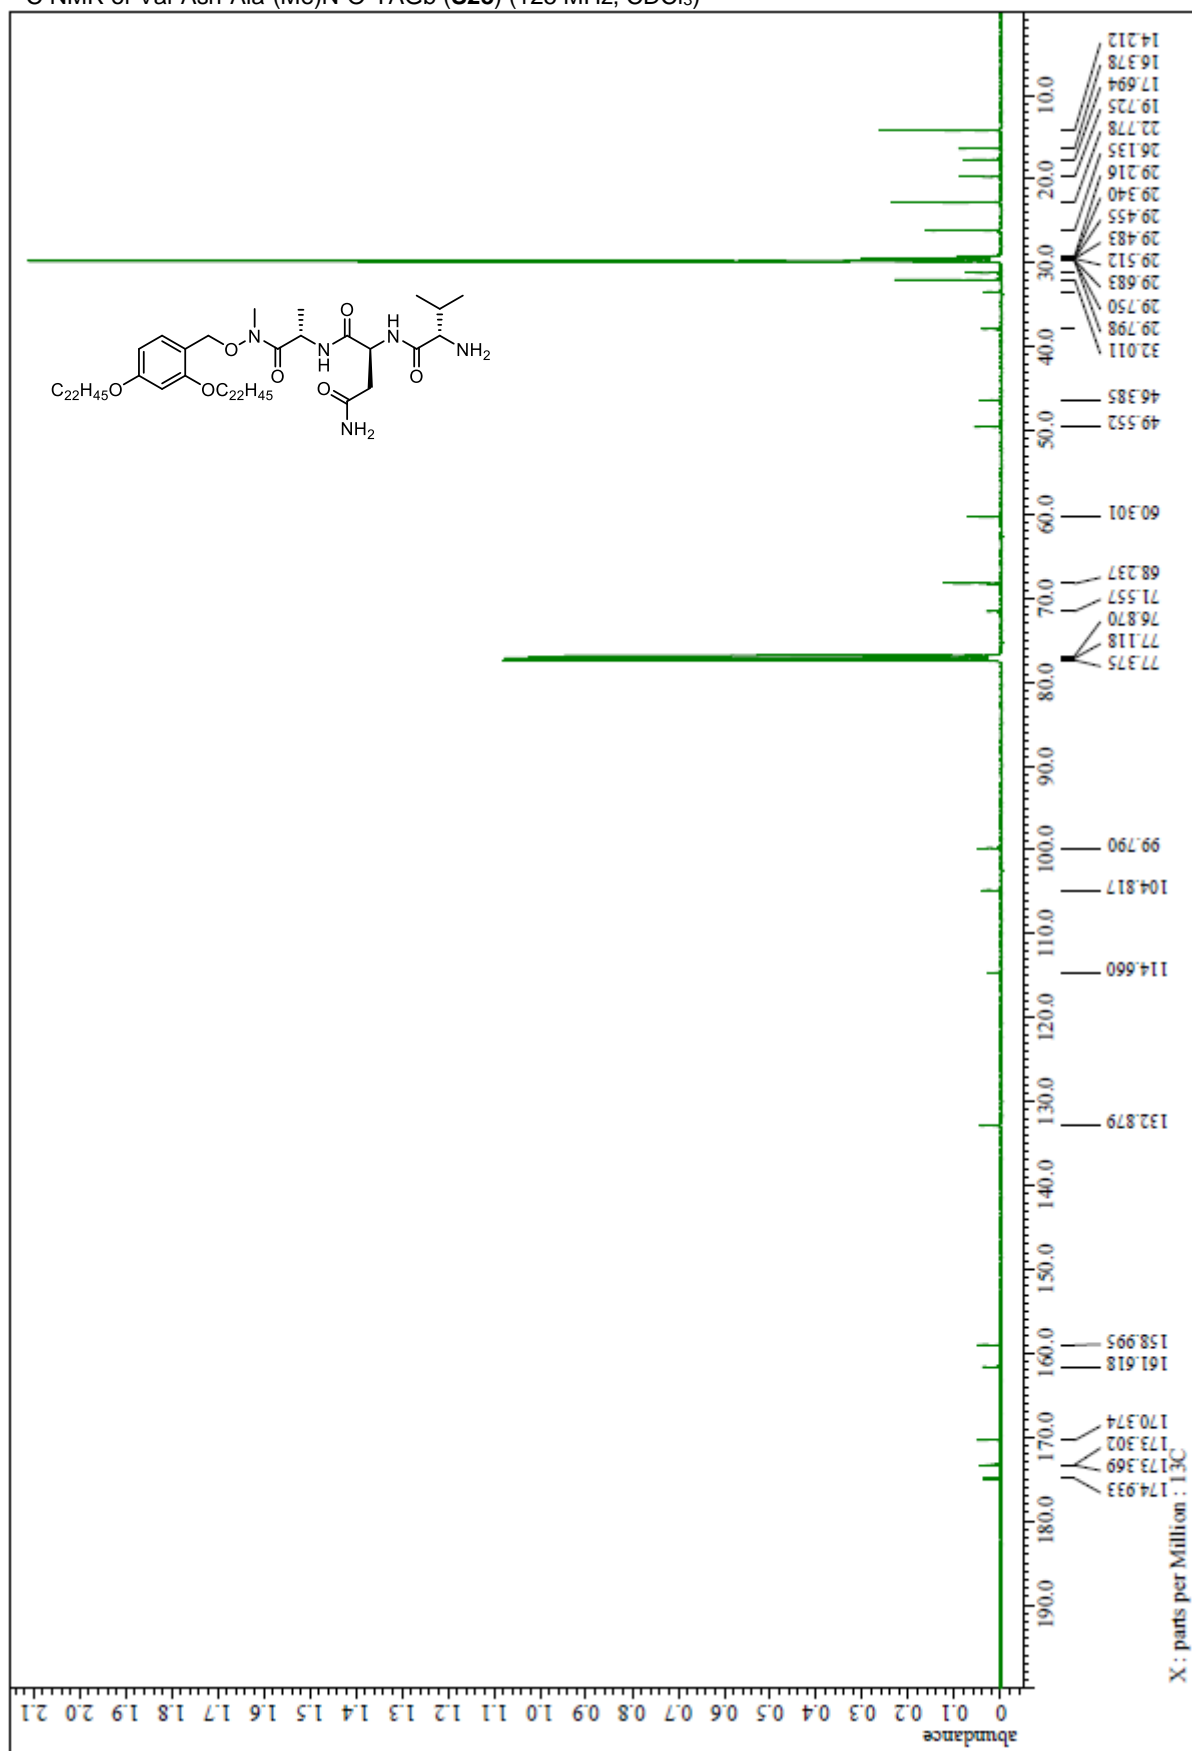

$^1\text{H}$  NMR of Fmoc-4MePro-Val-Asn-Ala-(Me)N-O-TAGb (**S29**) (500 MHz,  $\text{CDCl}_3$ )

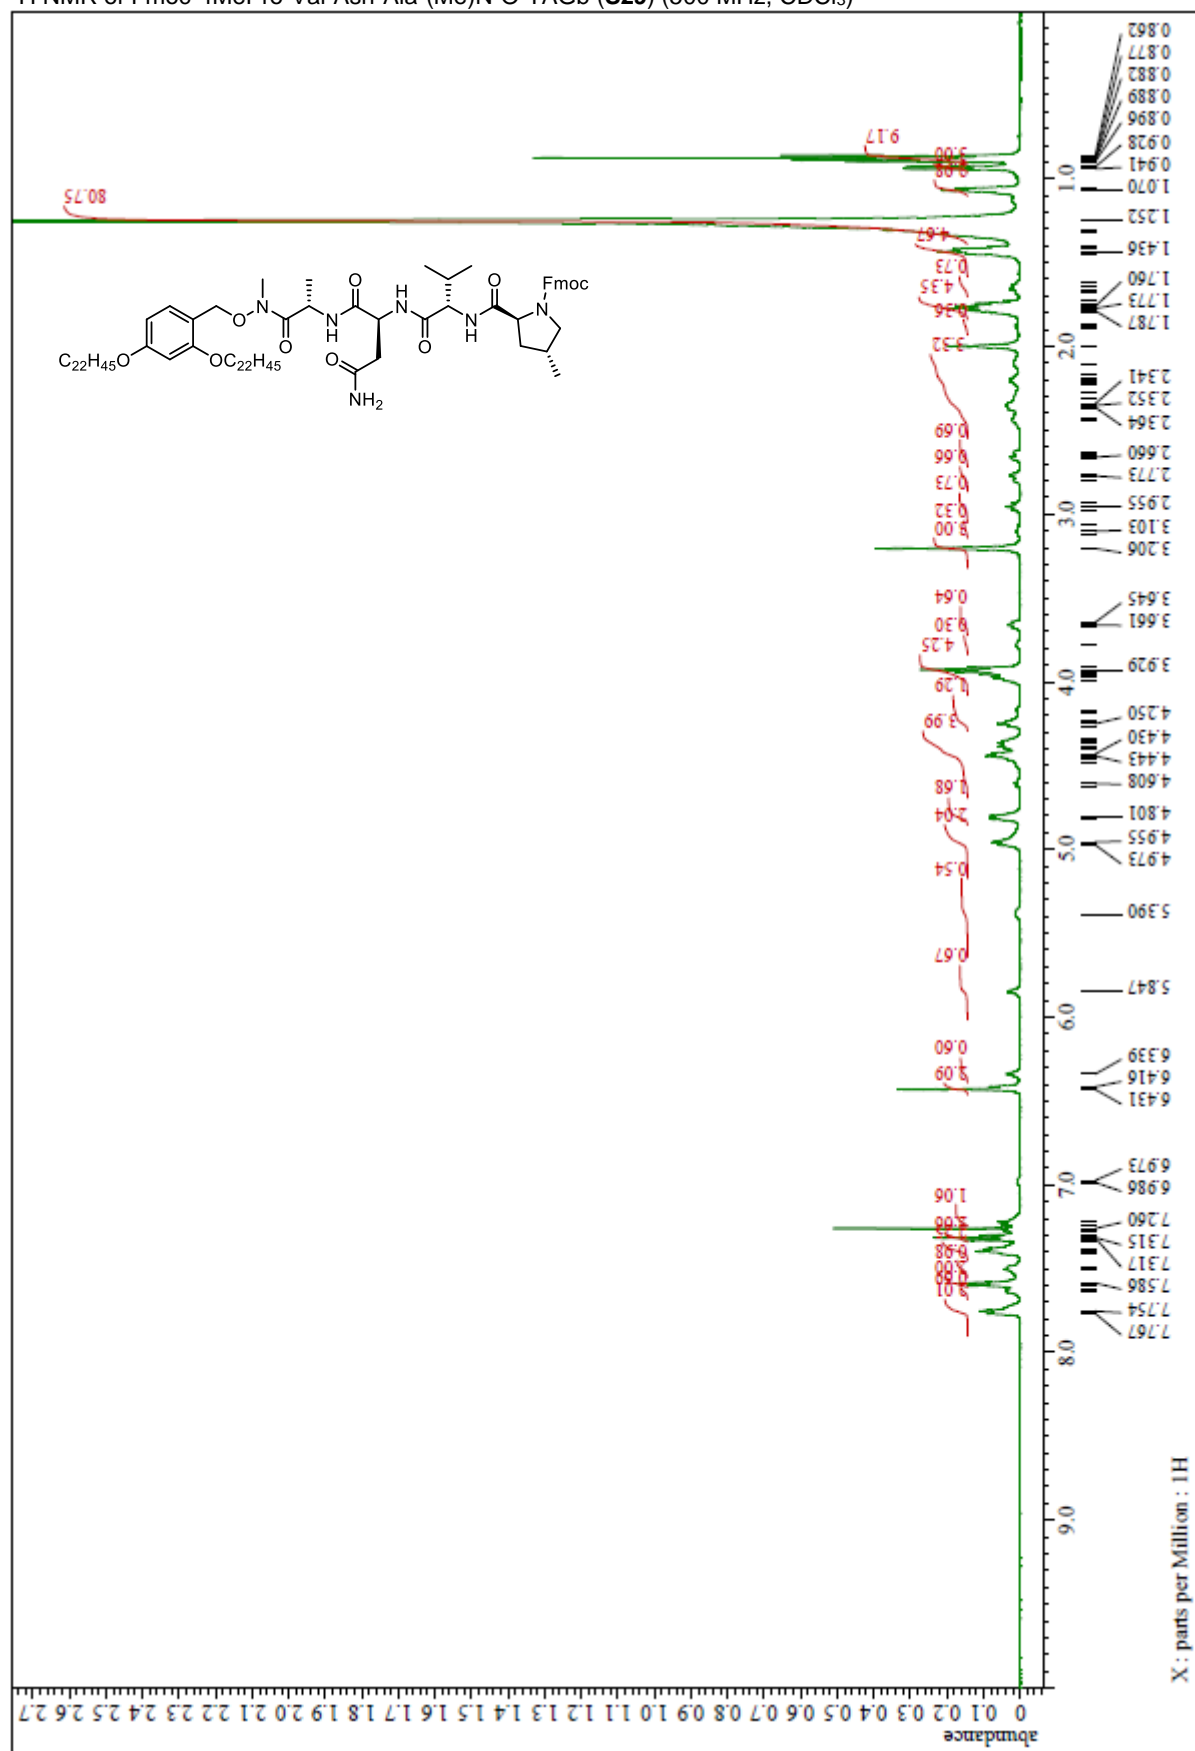



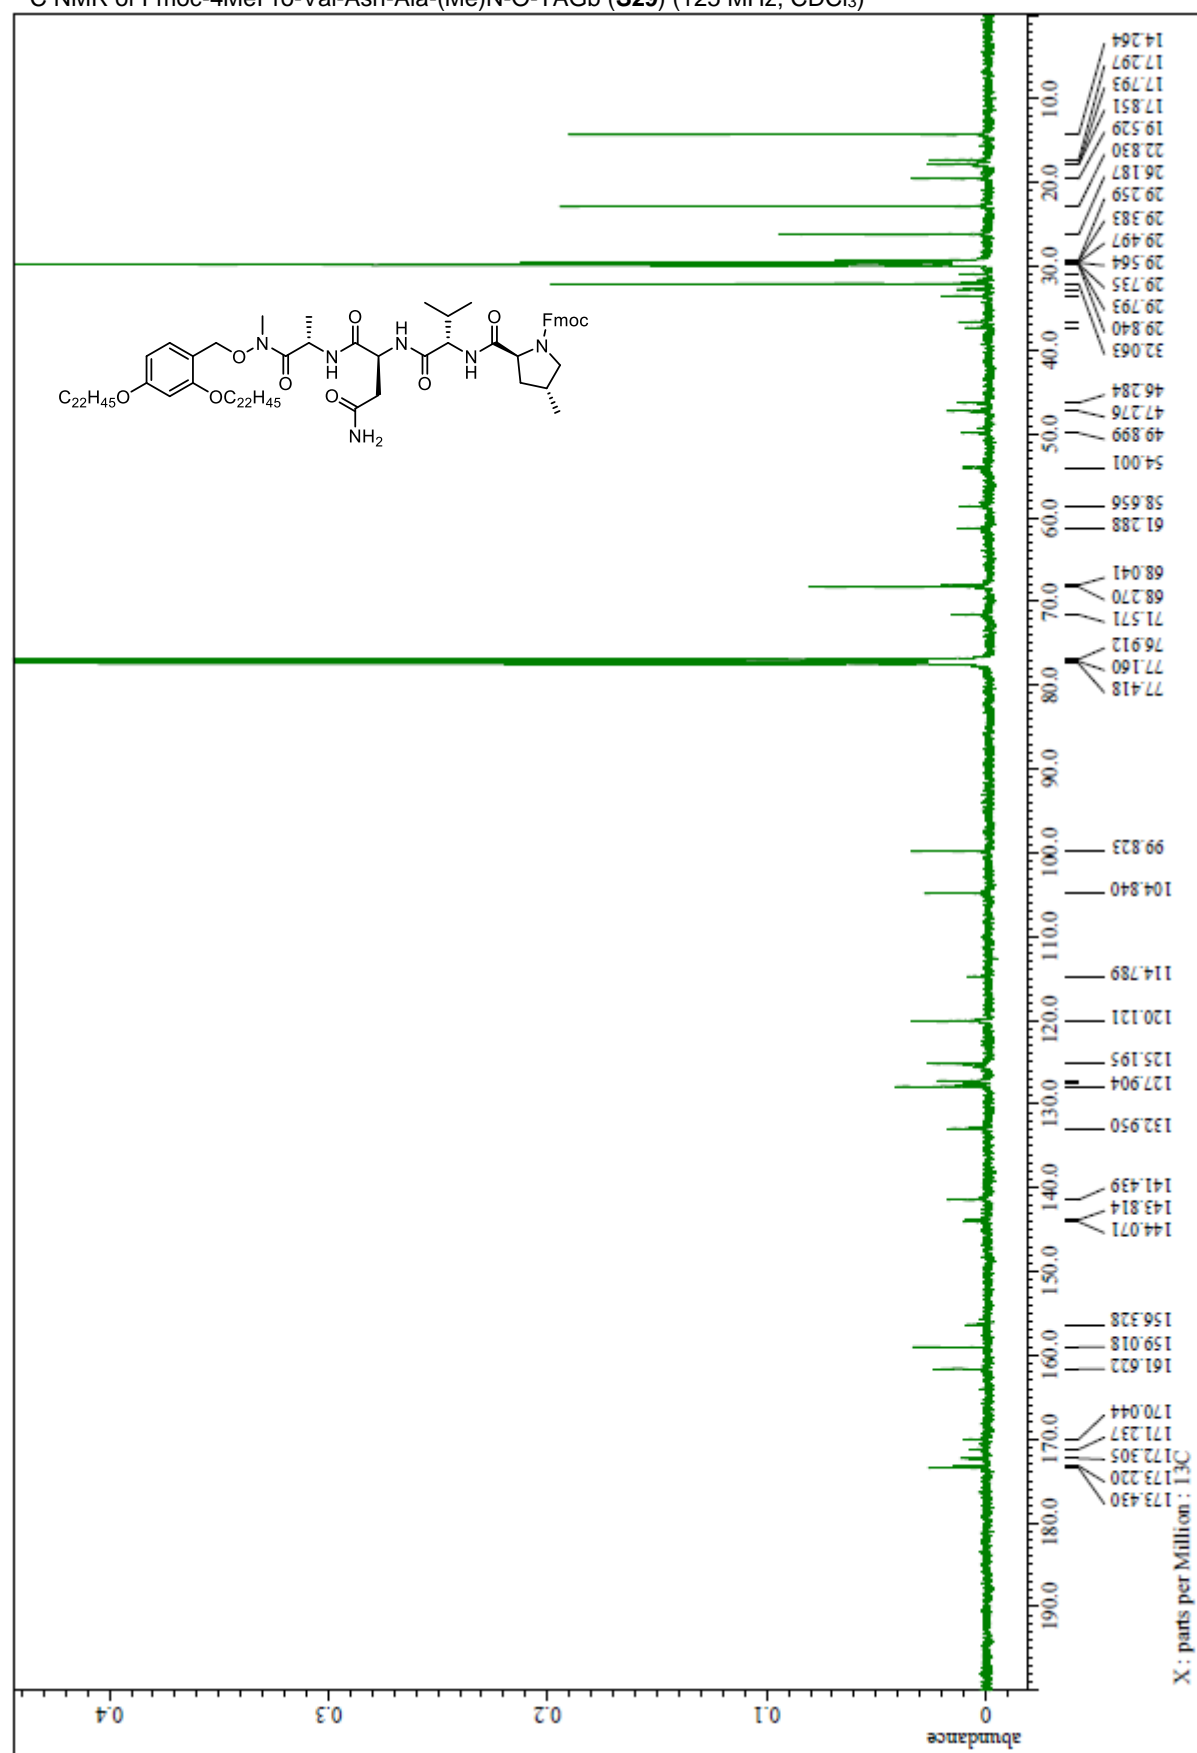

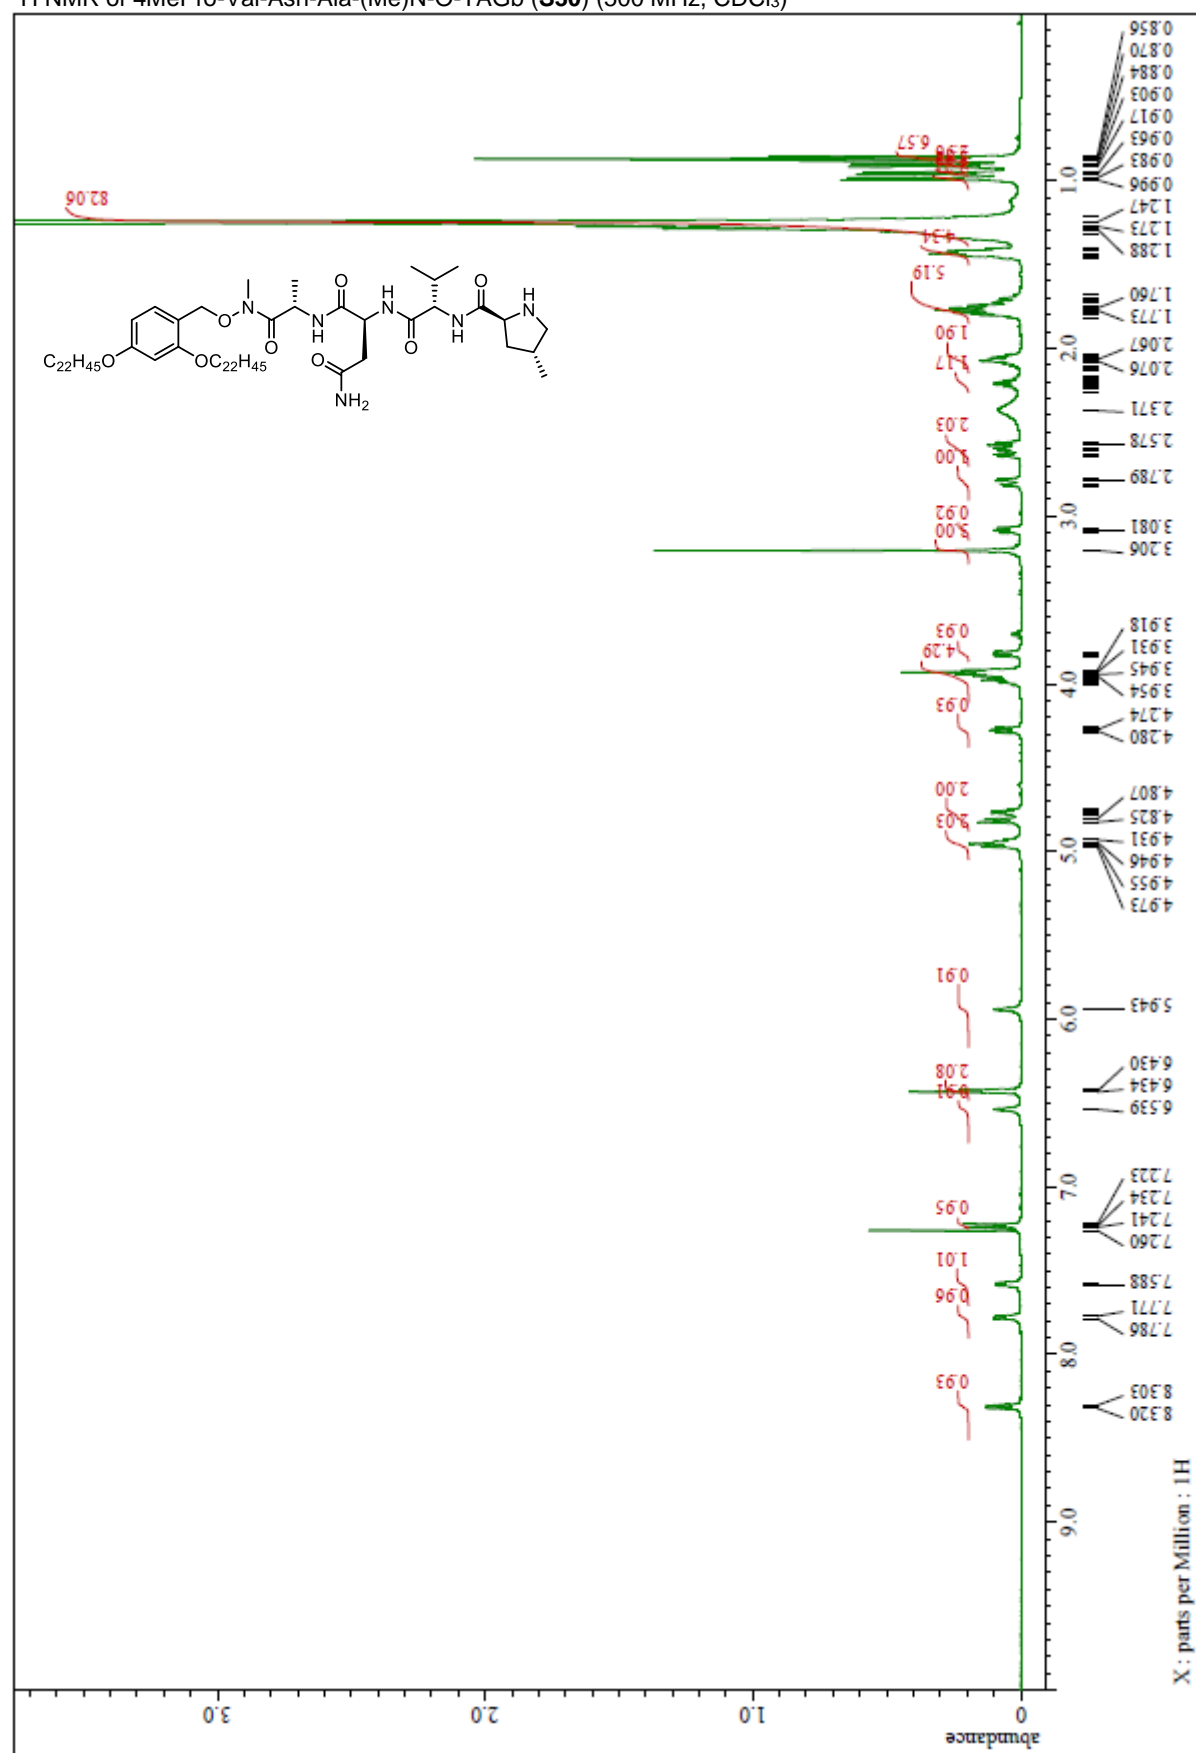

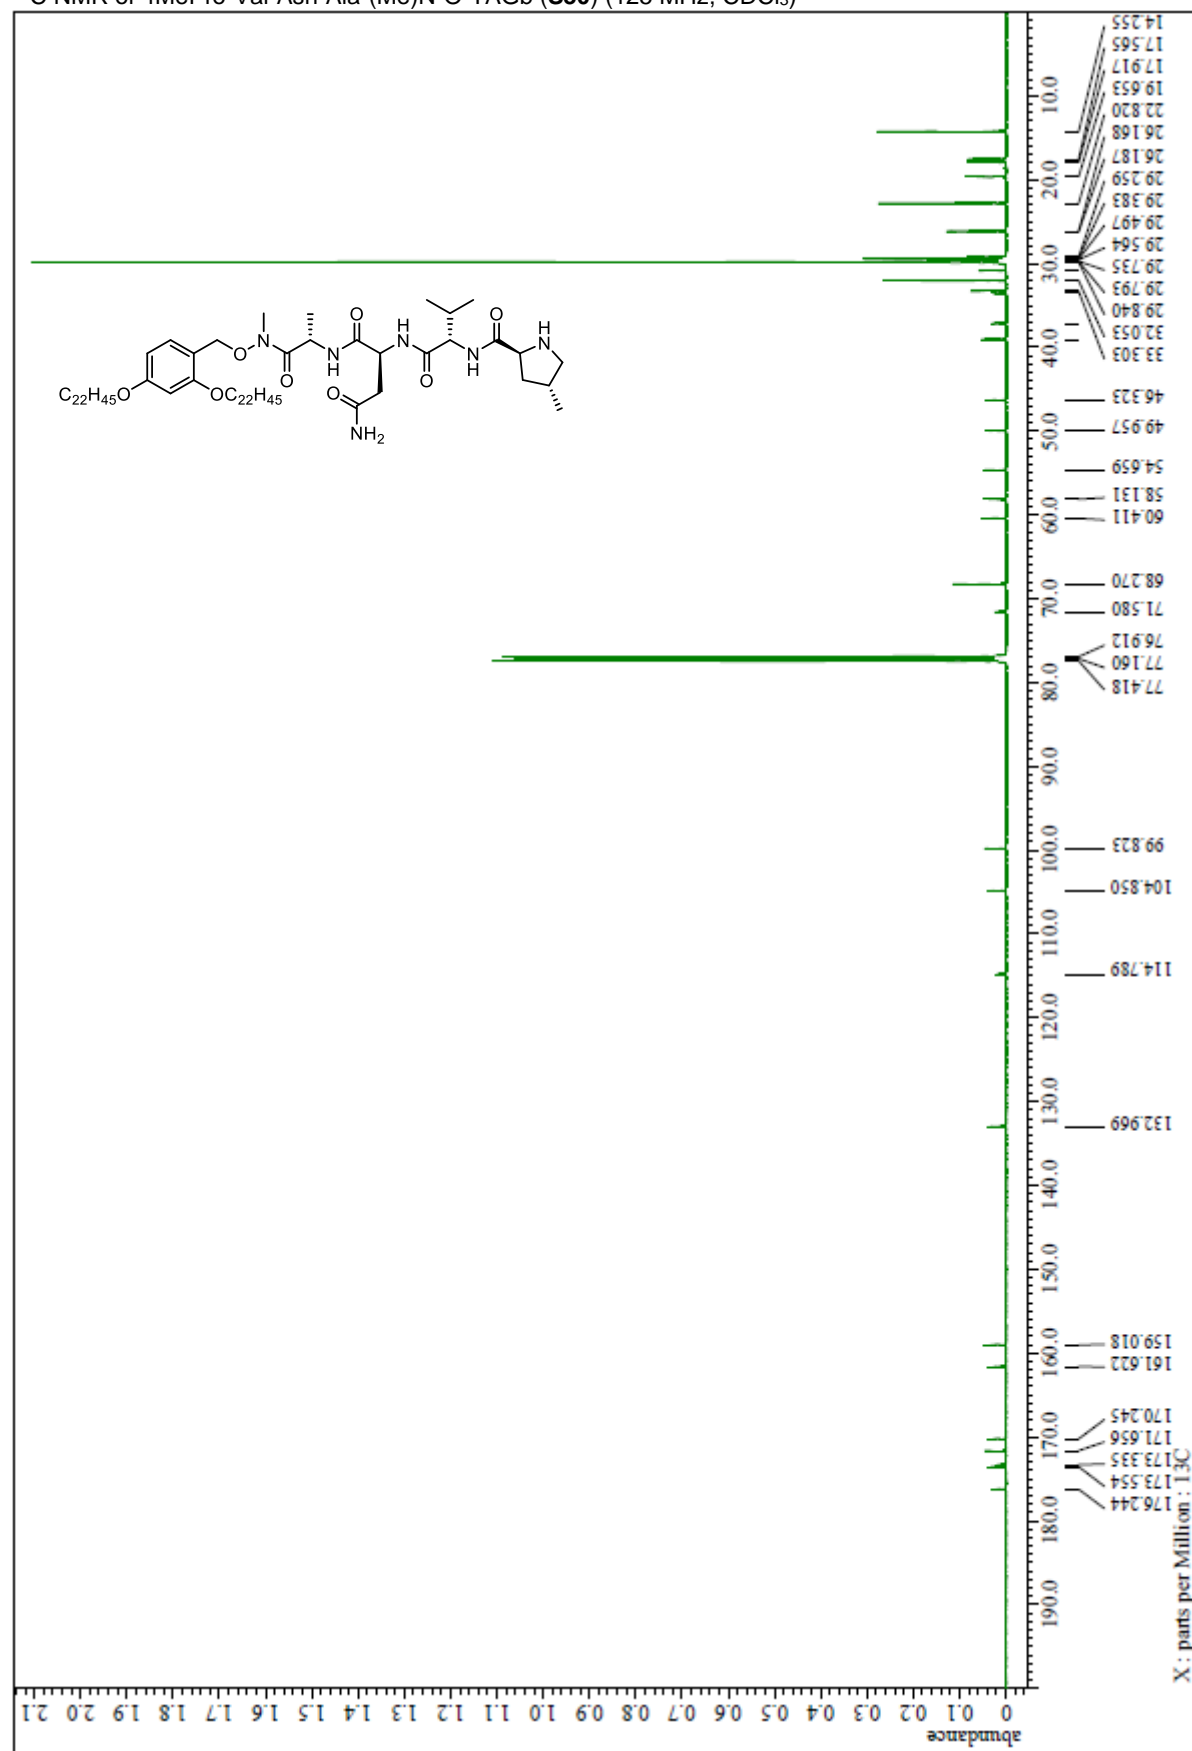

$^1\text{H}$  NMR of Fmoc-Thr-4MePro-Val-Asn-Ala-(Me)N-O-TAGb (**S31**) (500 MHz,  $\text{CDCl}_3$ )

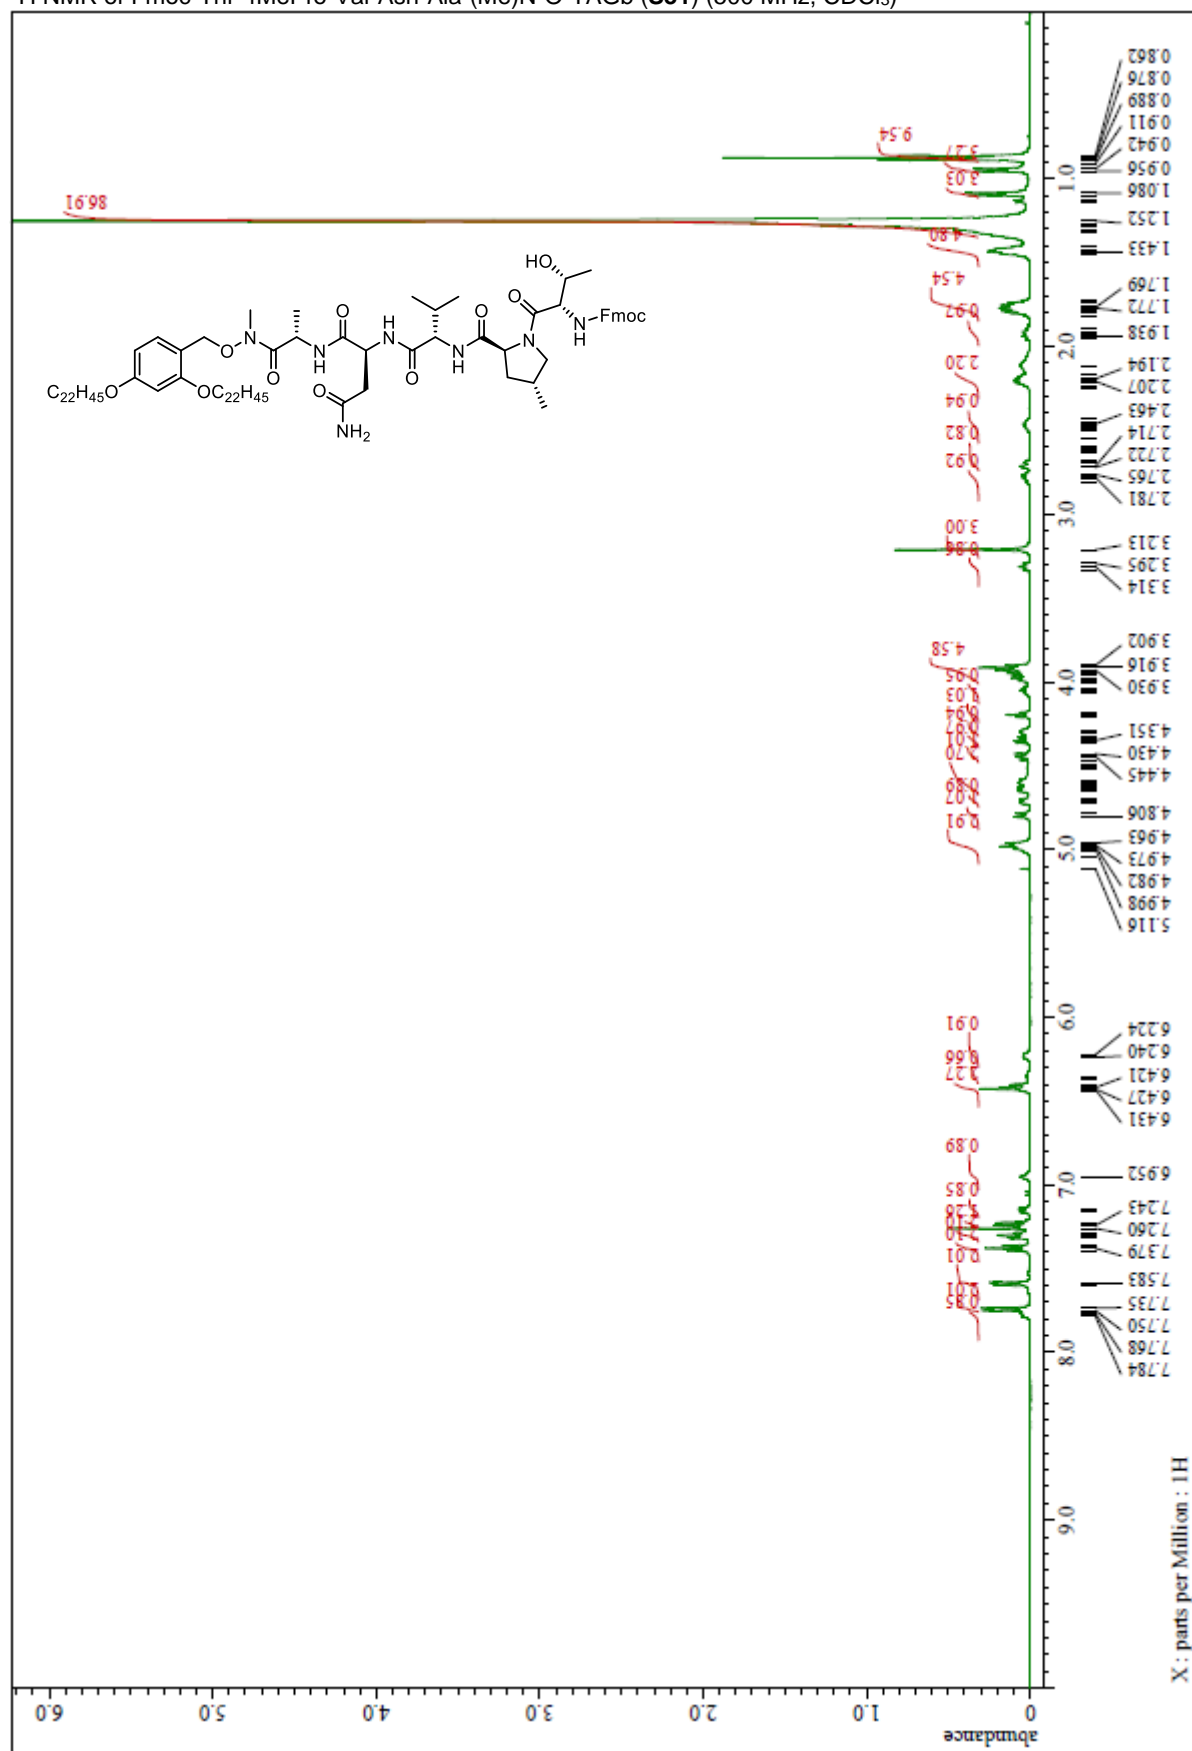

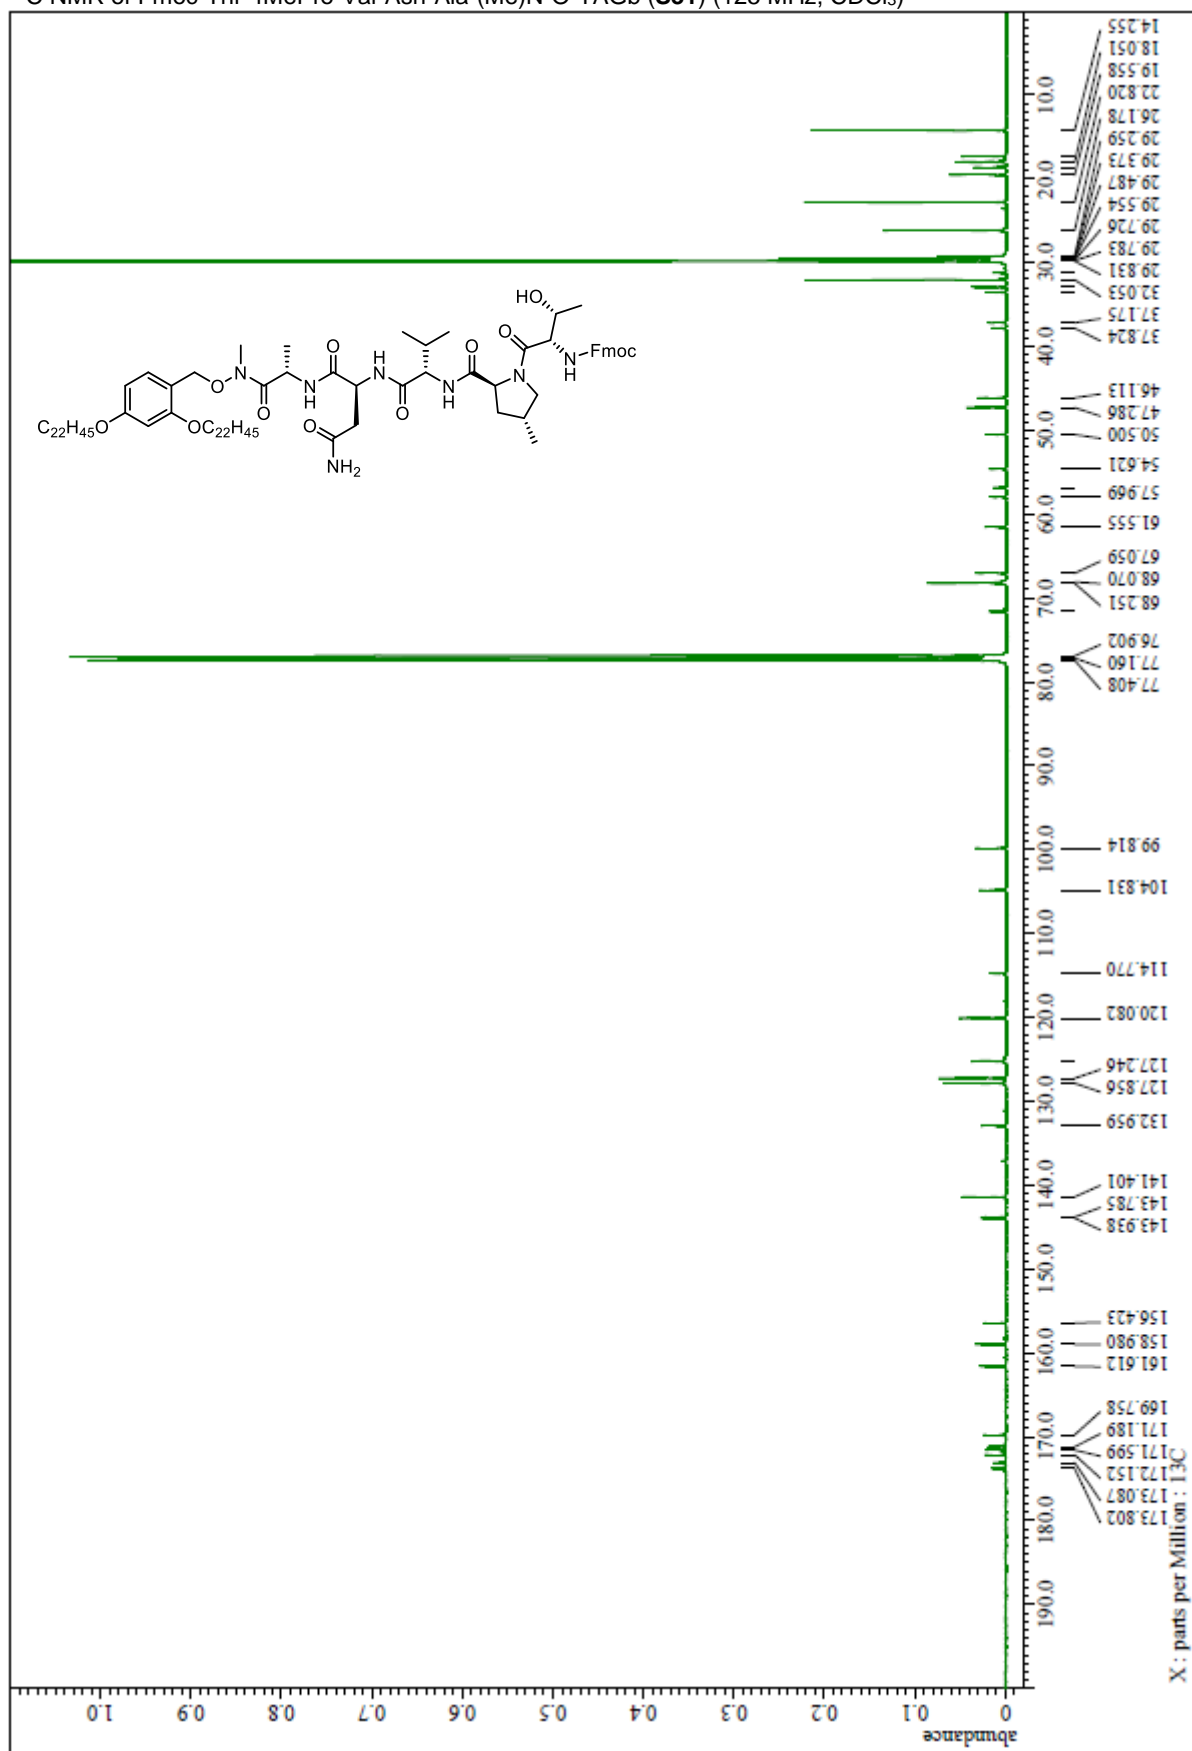

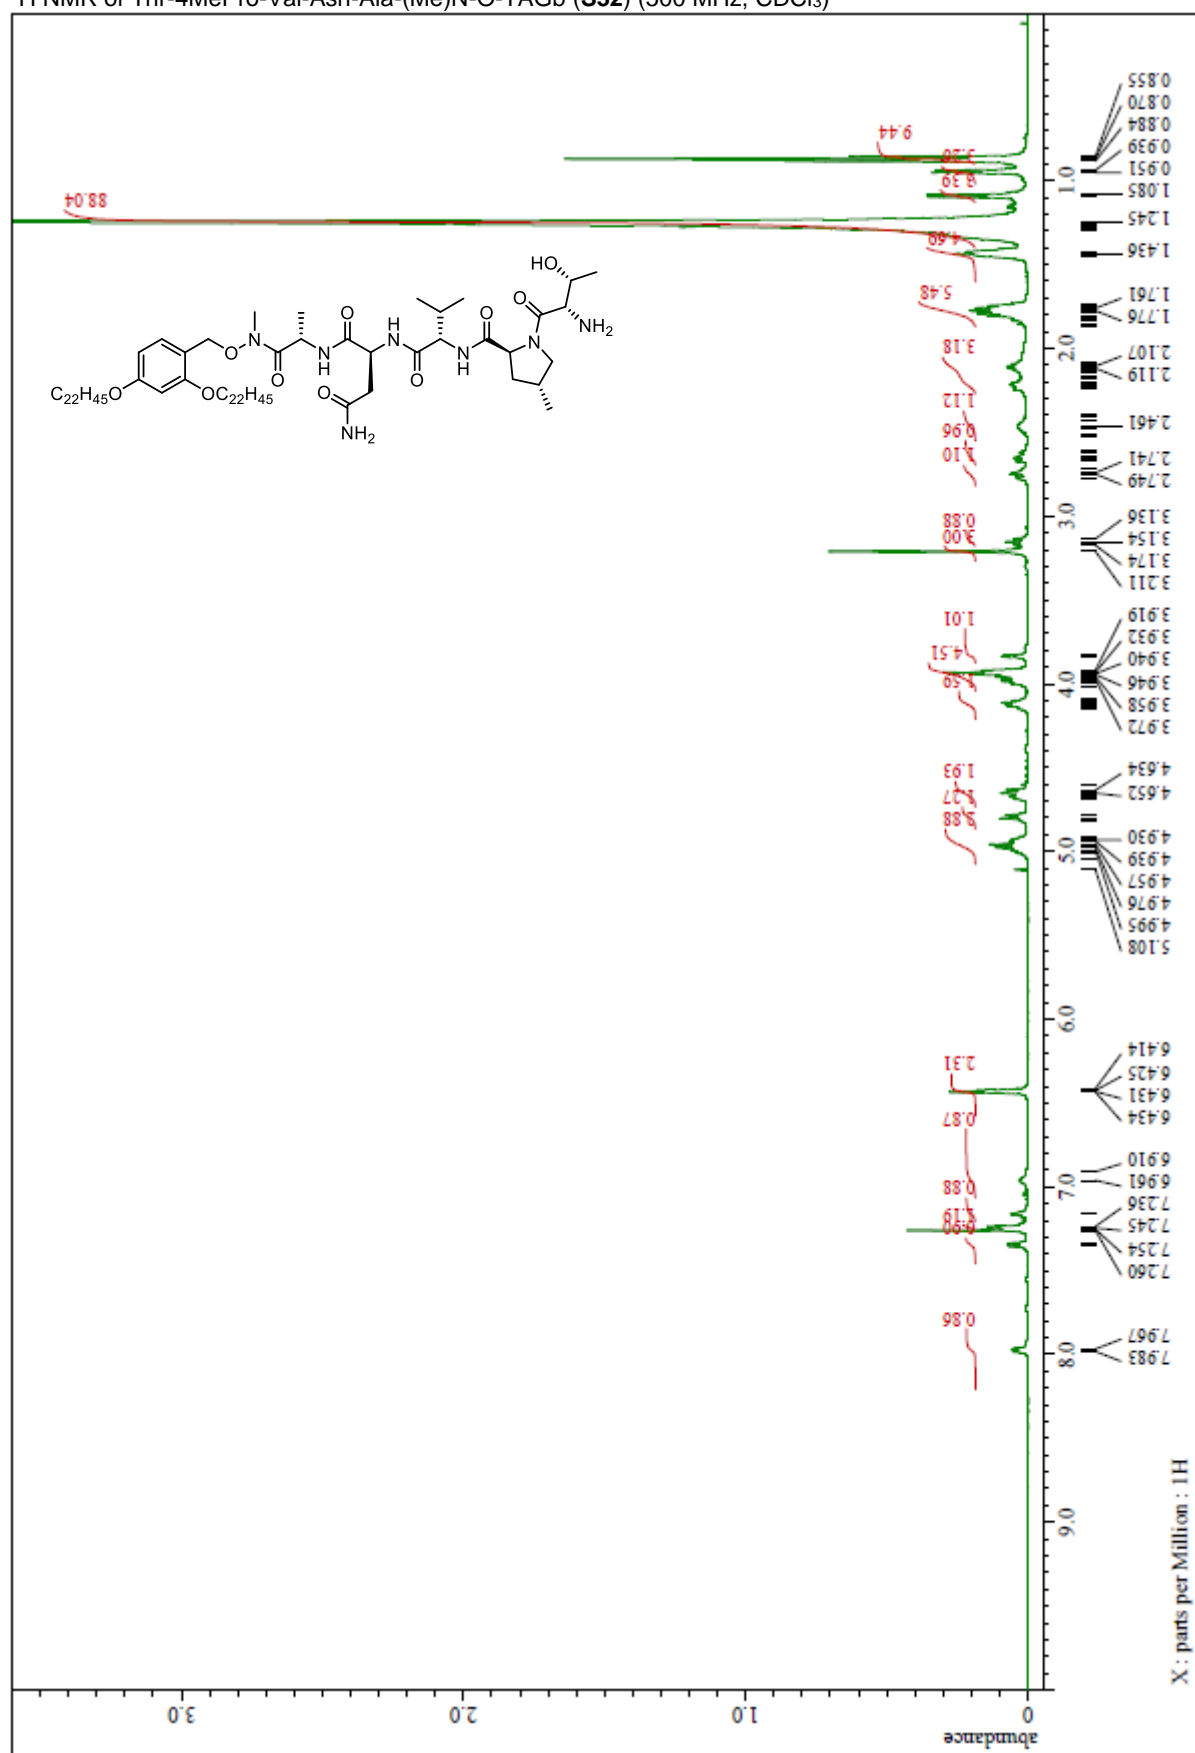

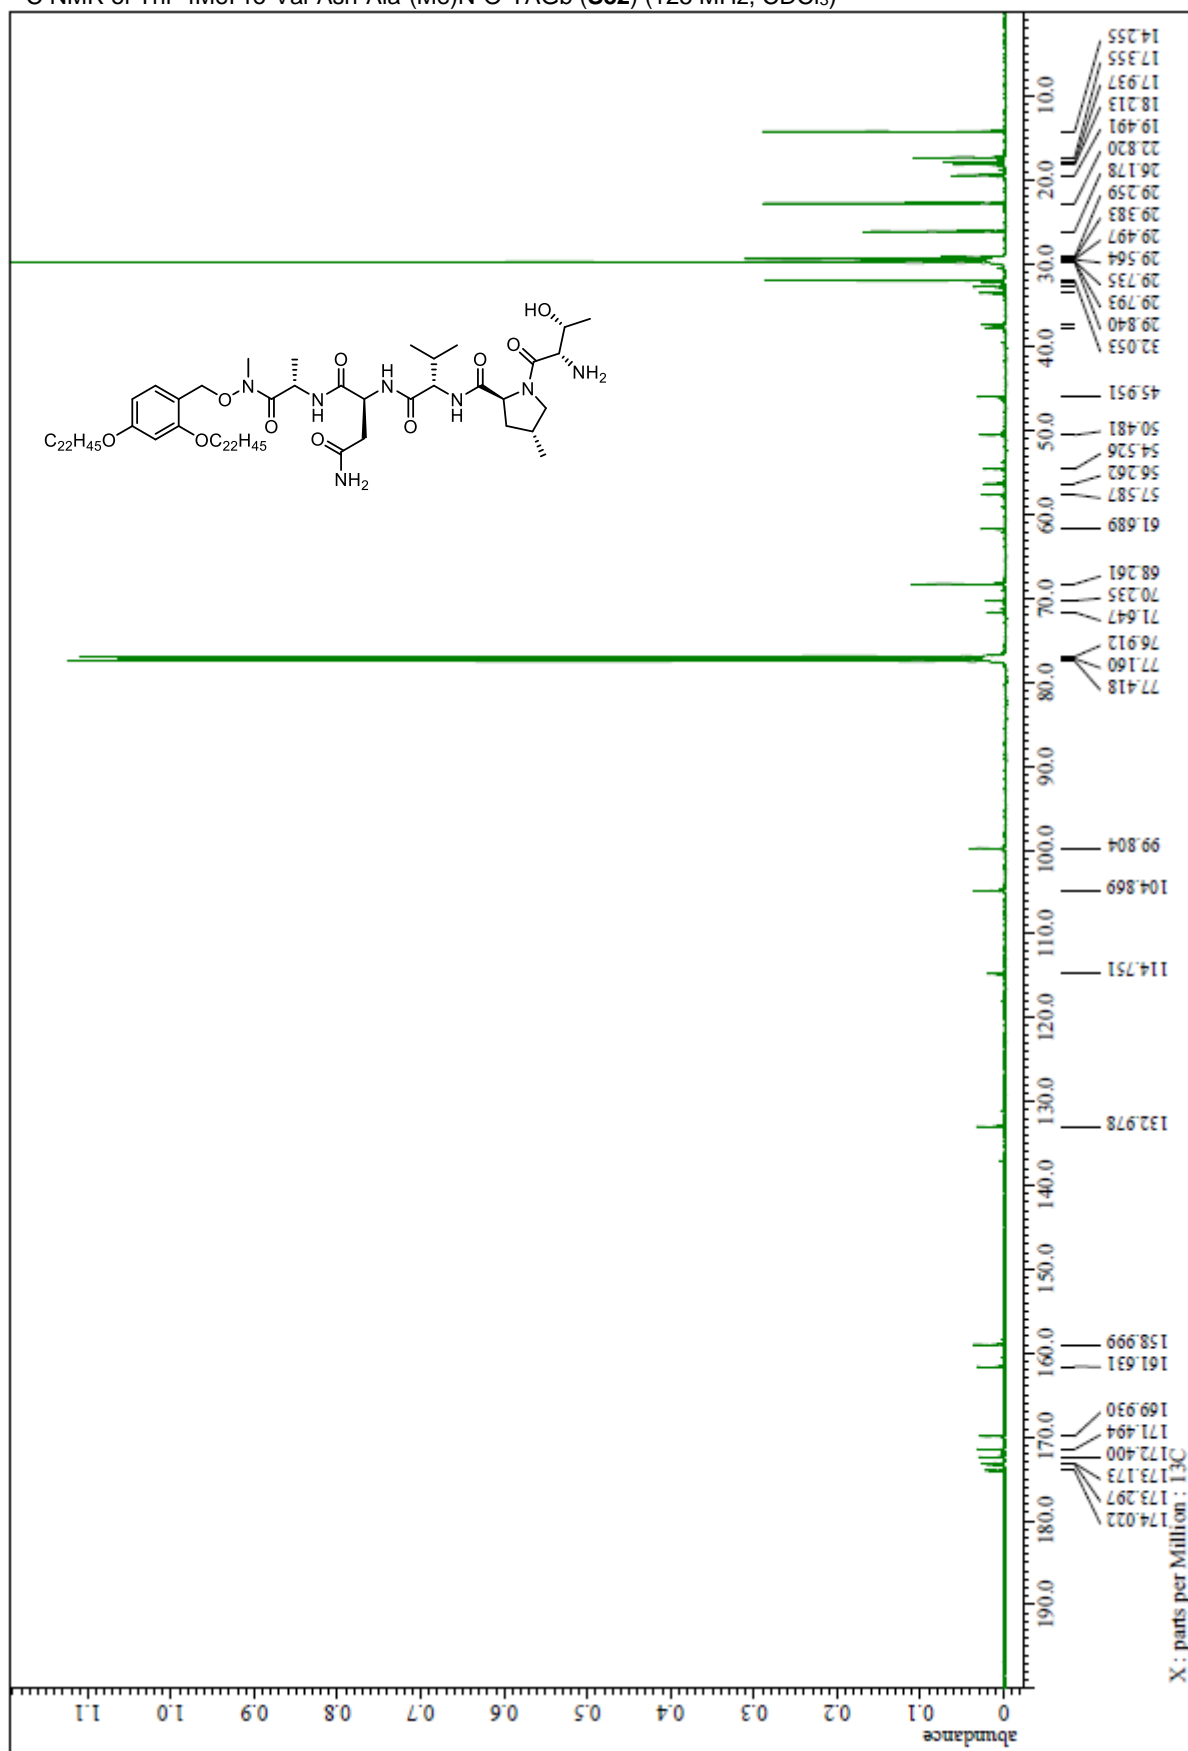

$^1\text{H}$  NMR of Oleic acid-Thr-4MePro-Val-Asn-Ala-(Me)N-O-TAGb (**12**) (500 MHz,  $\text{CDCl}_3$ )

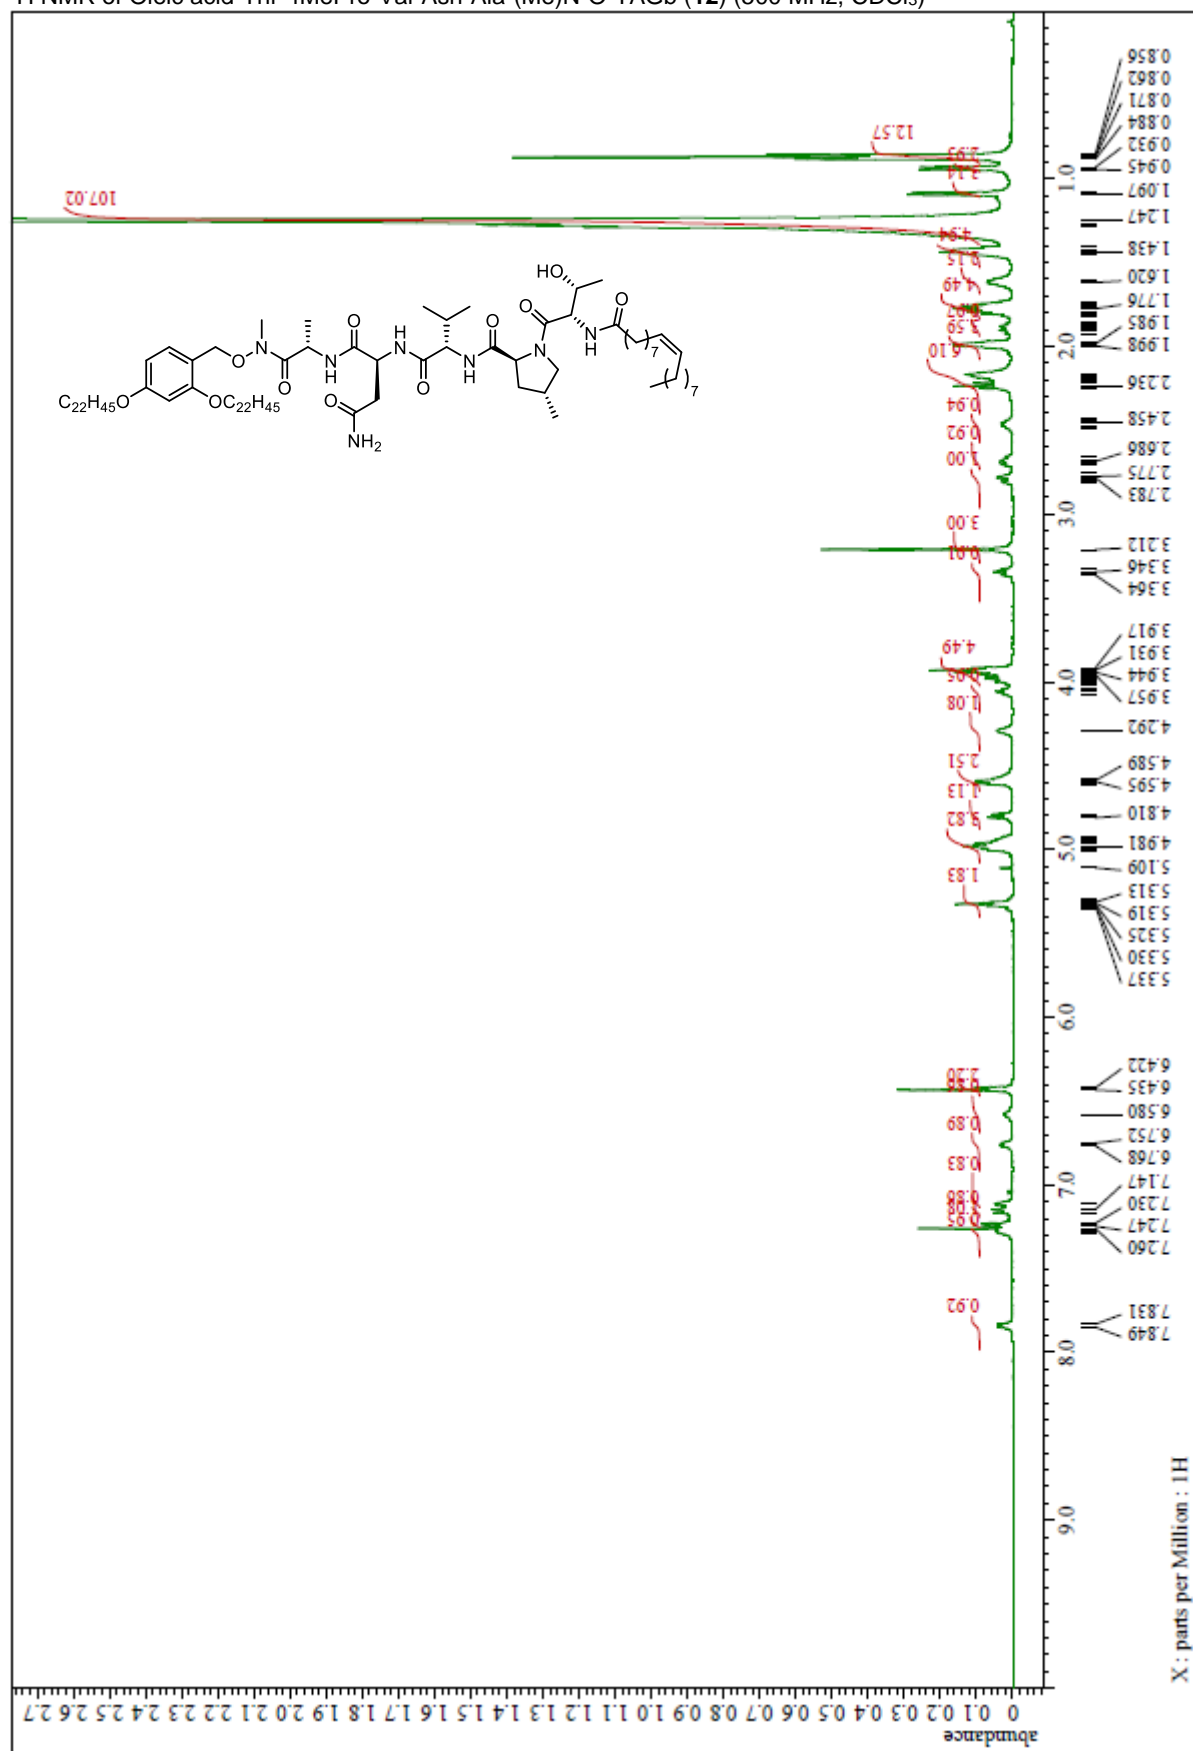



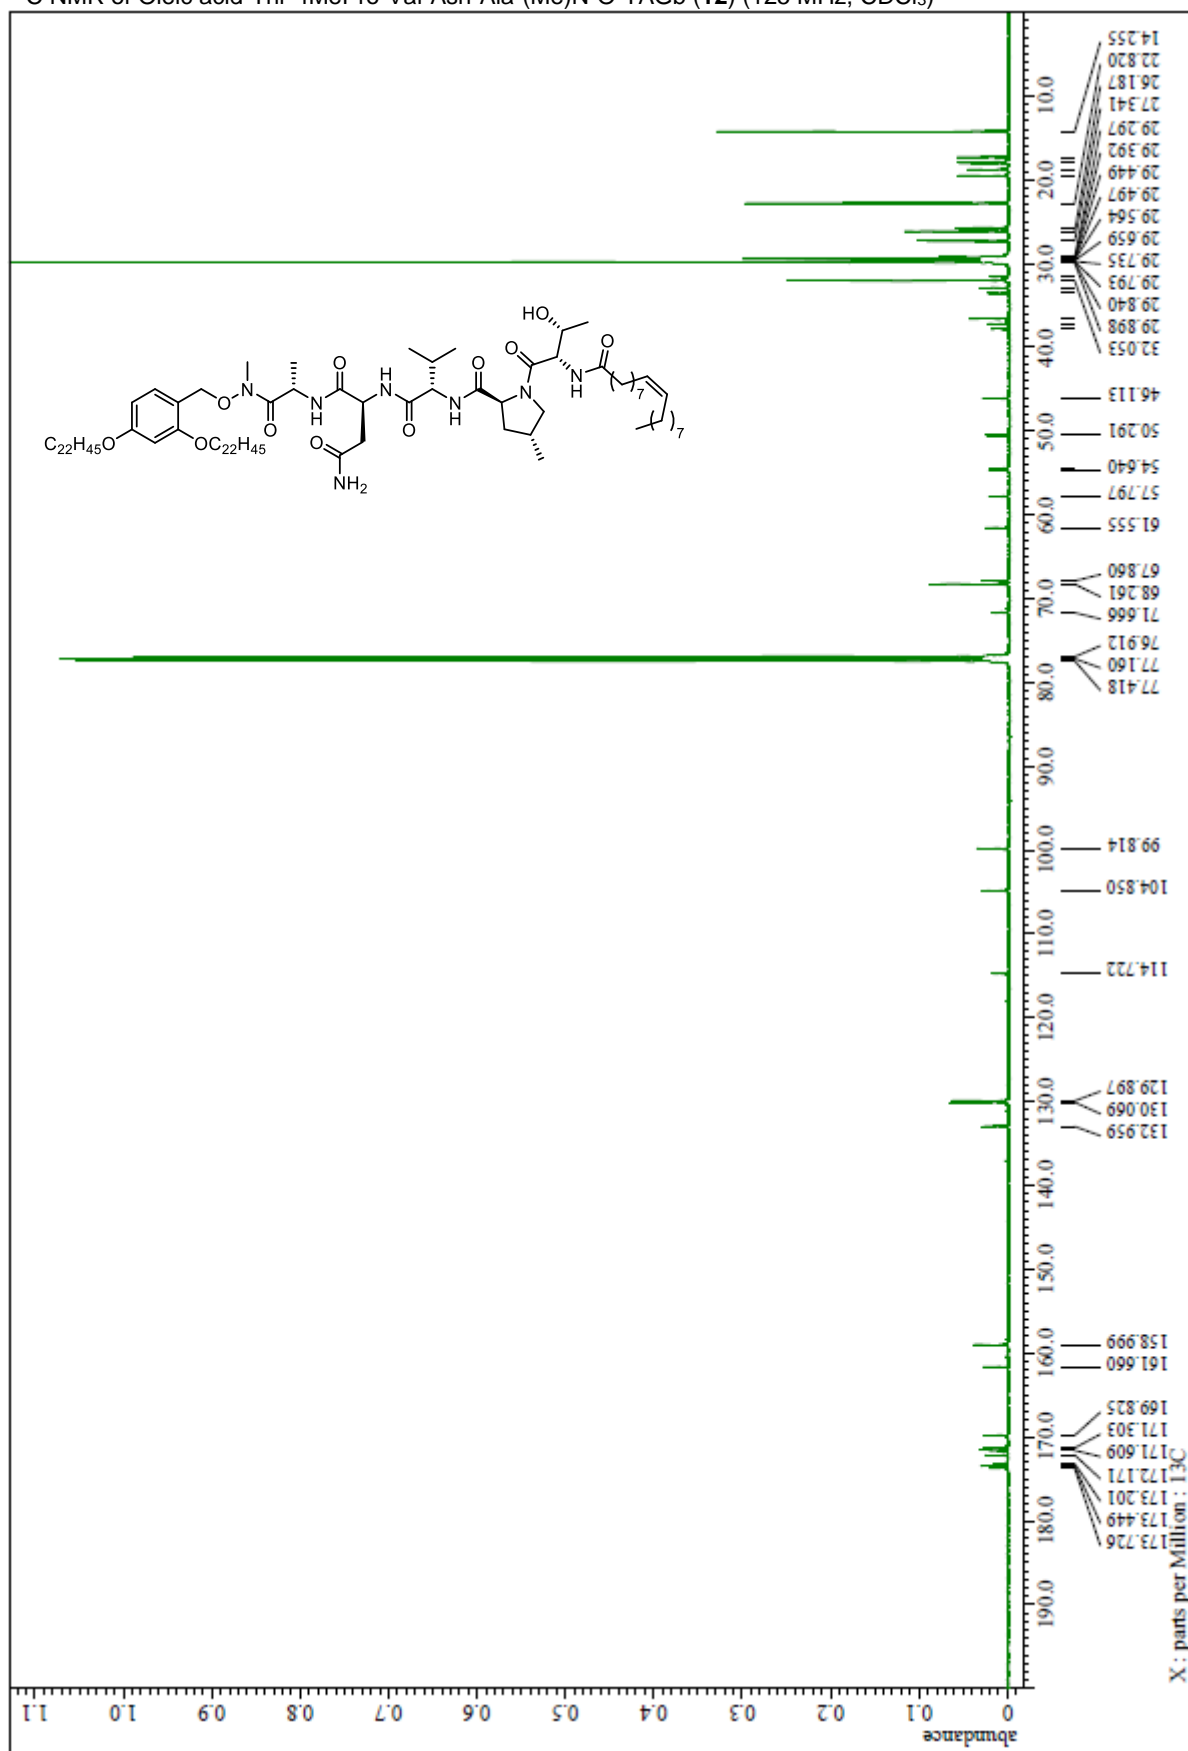

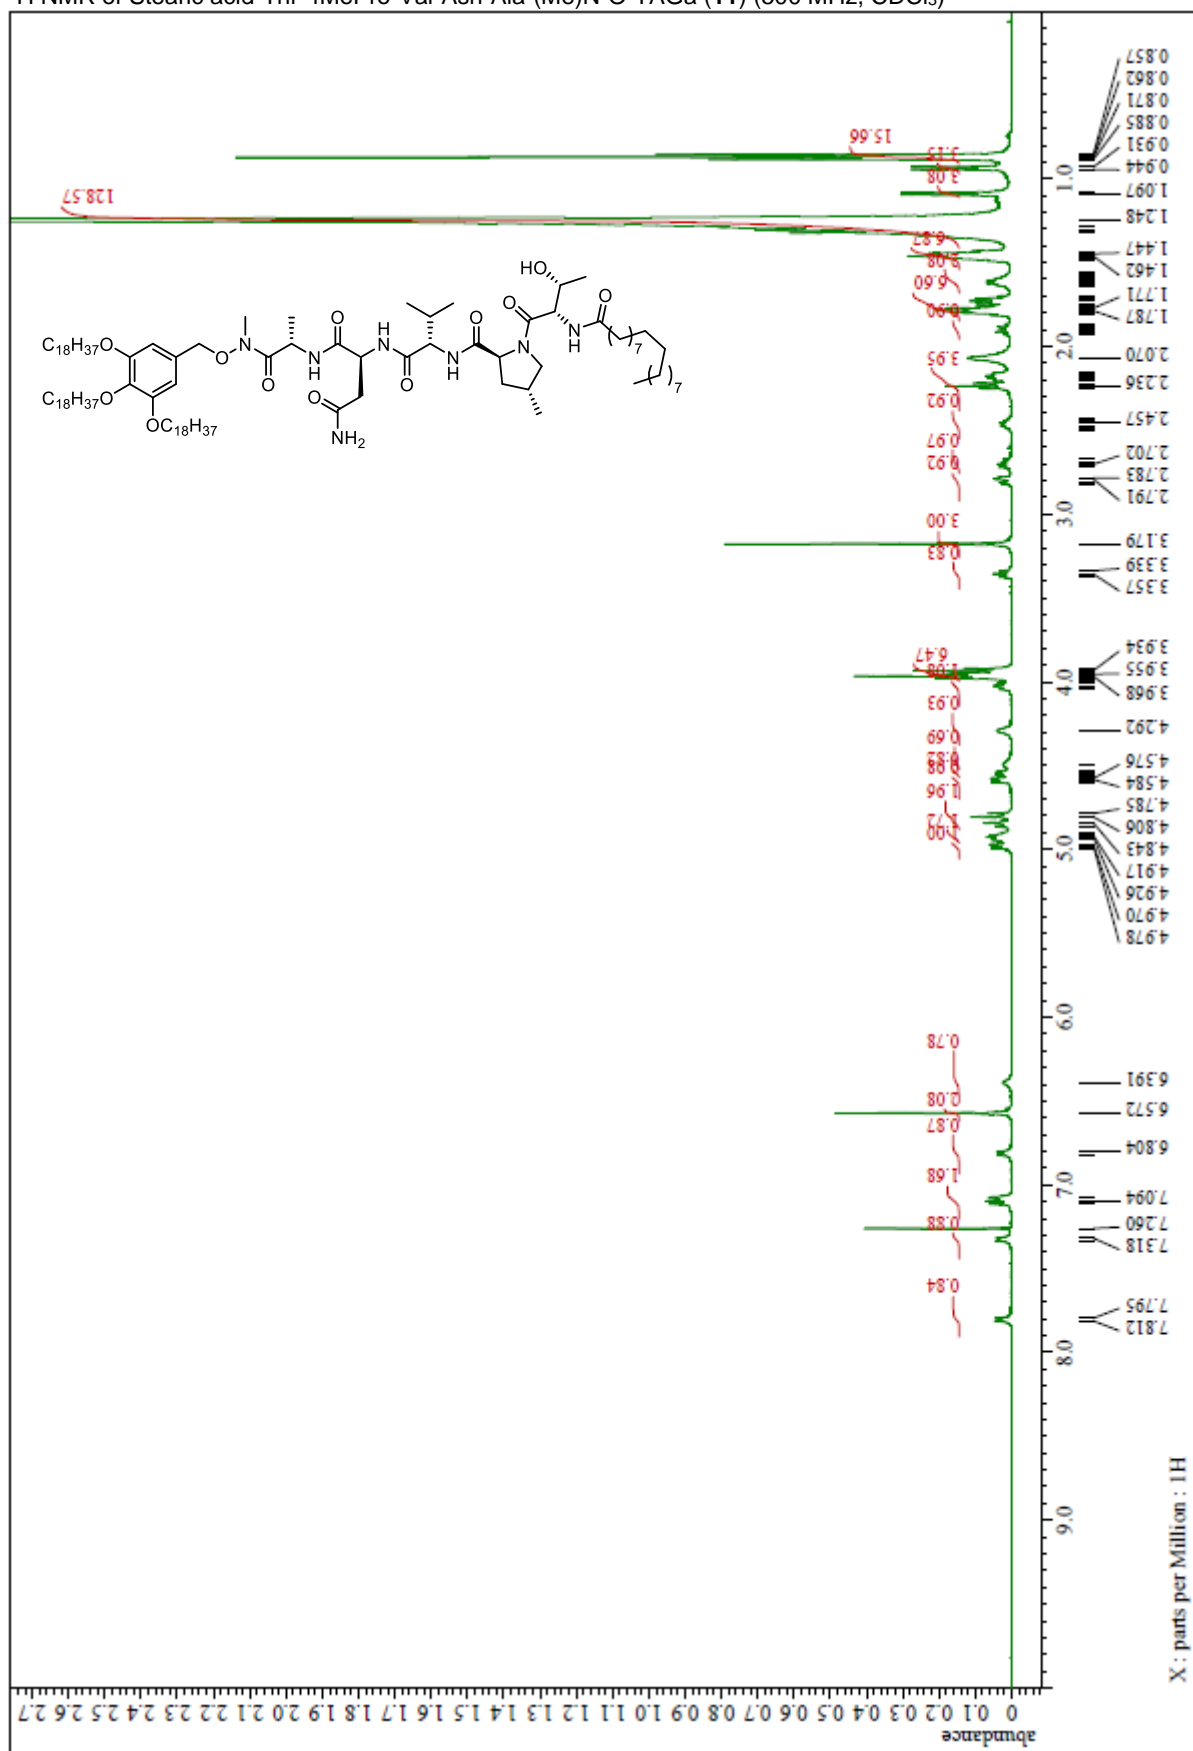

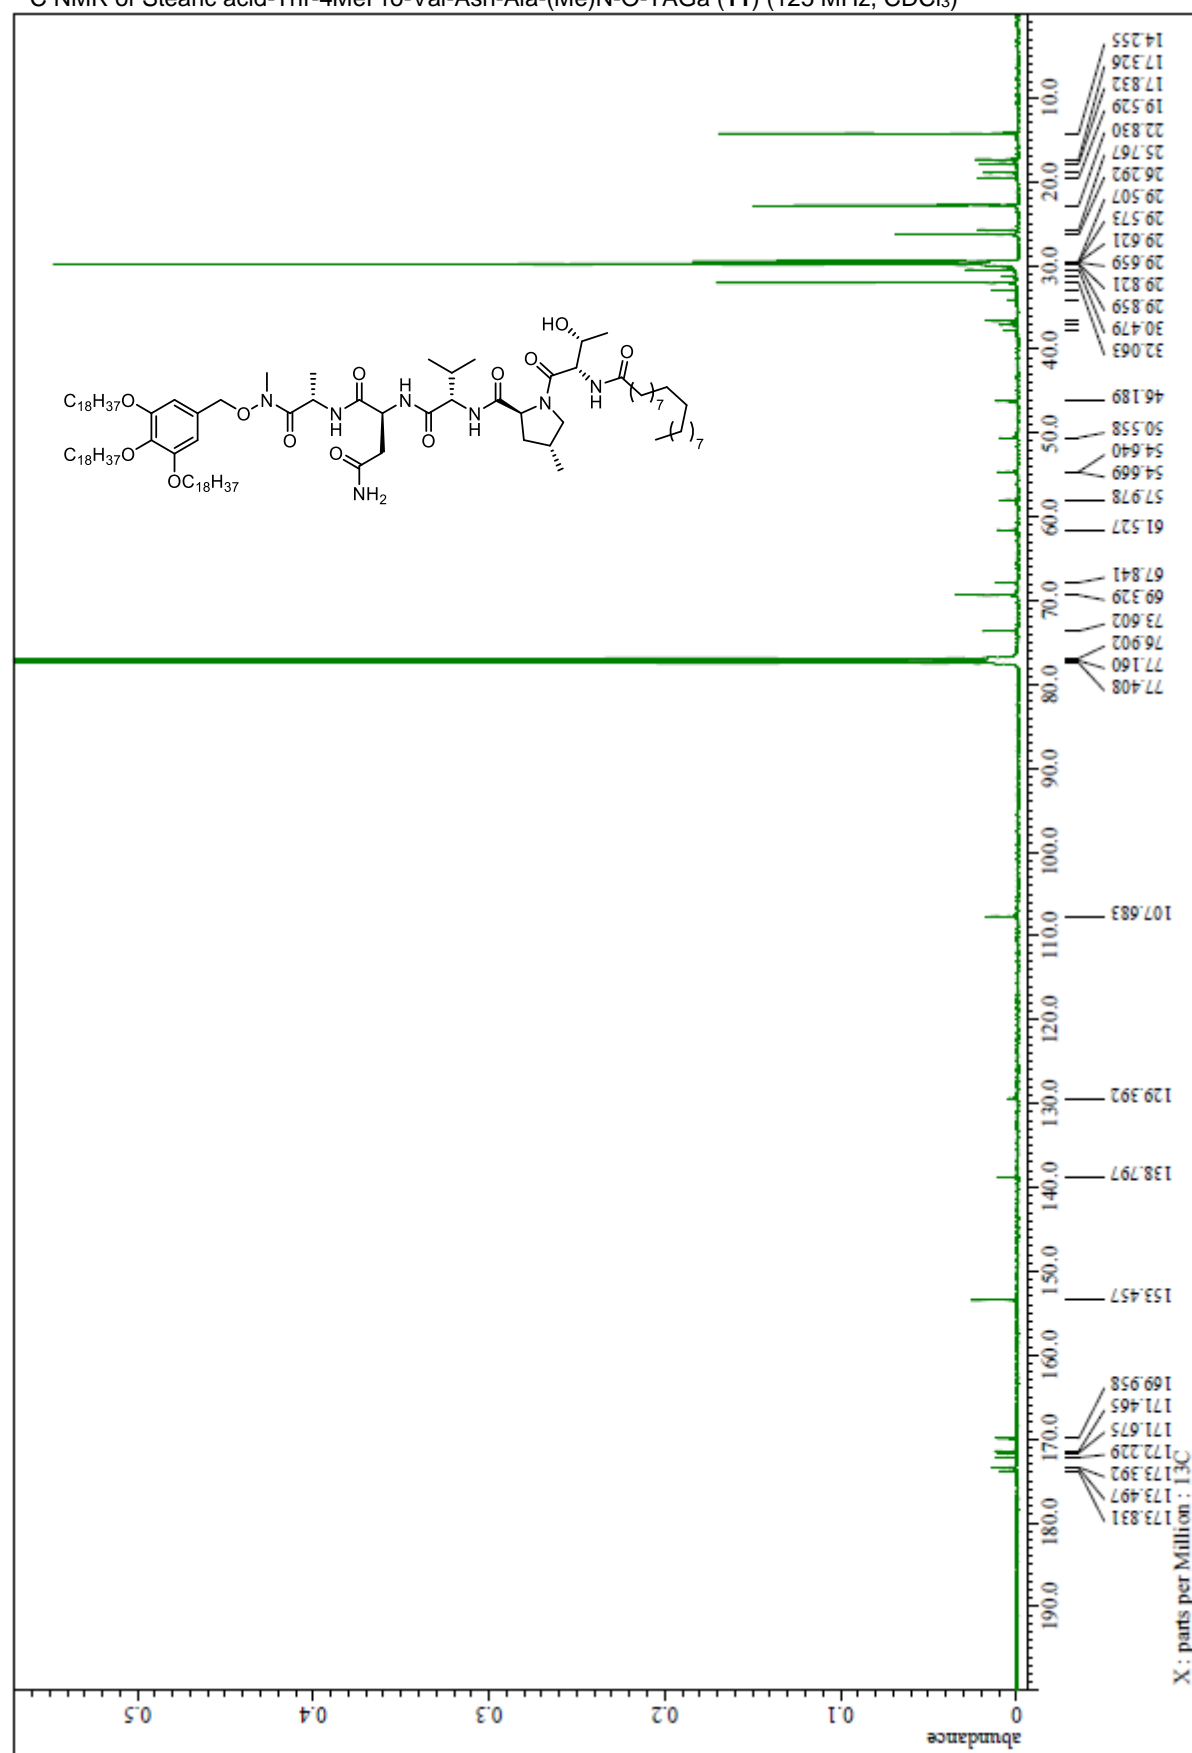

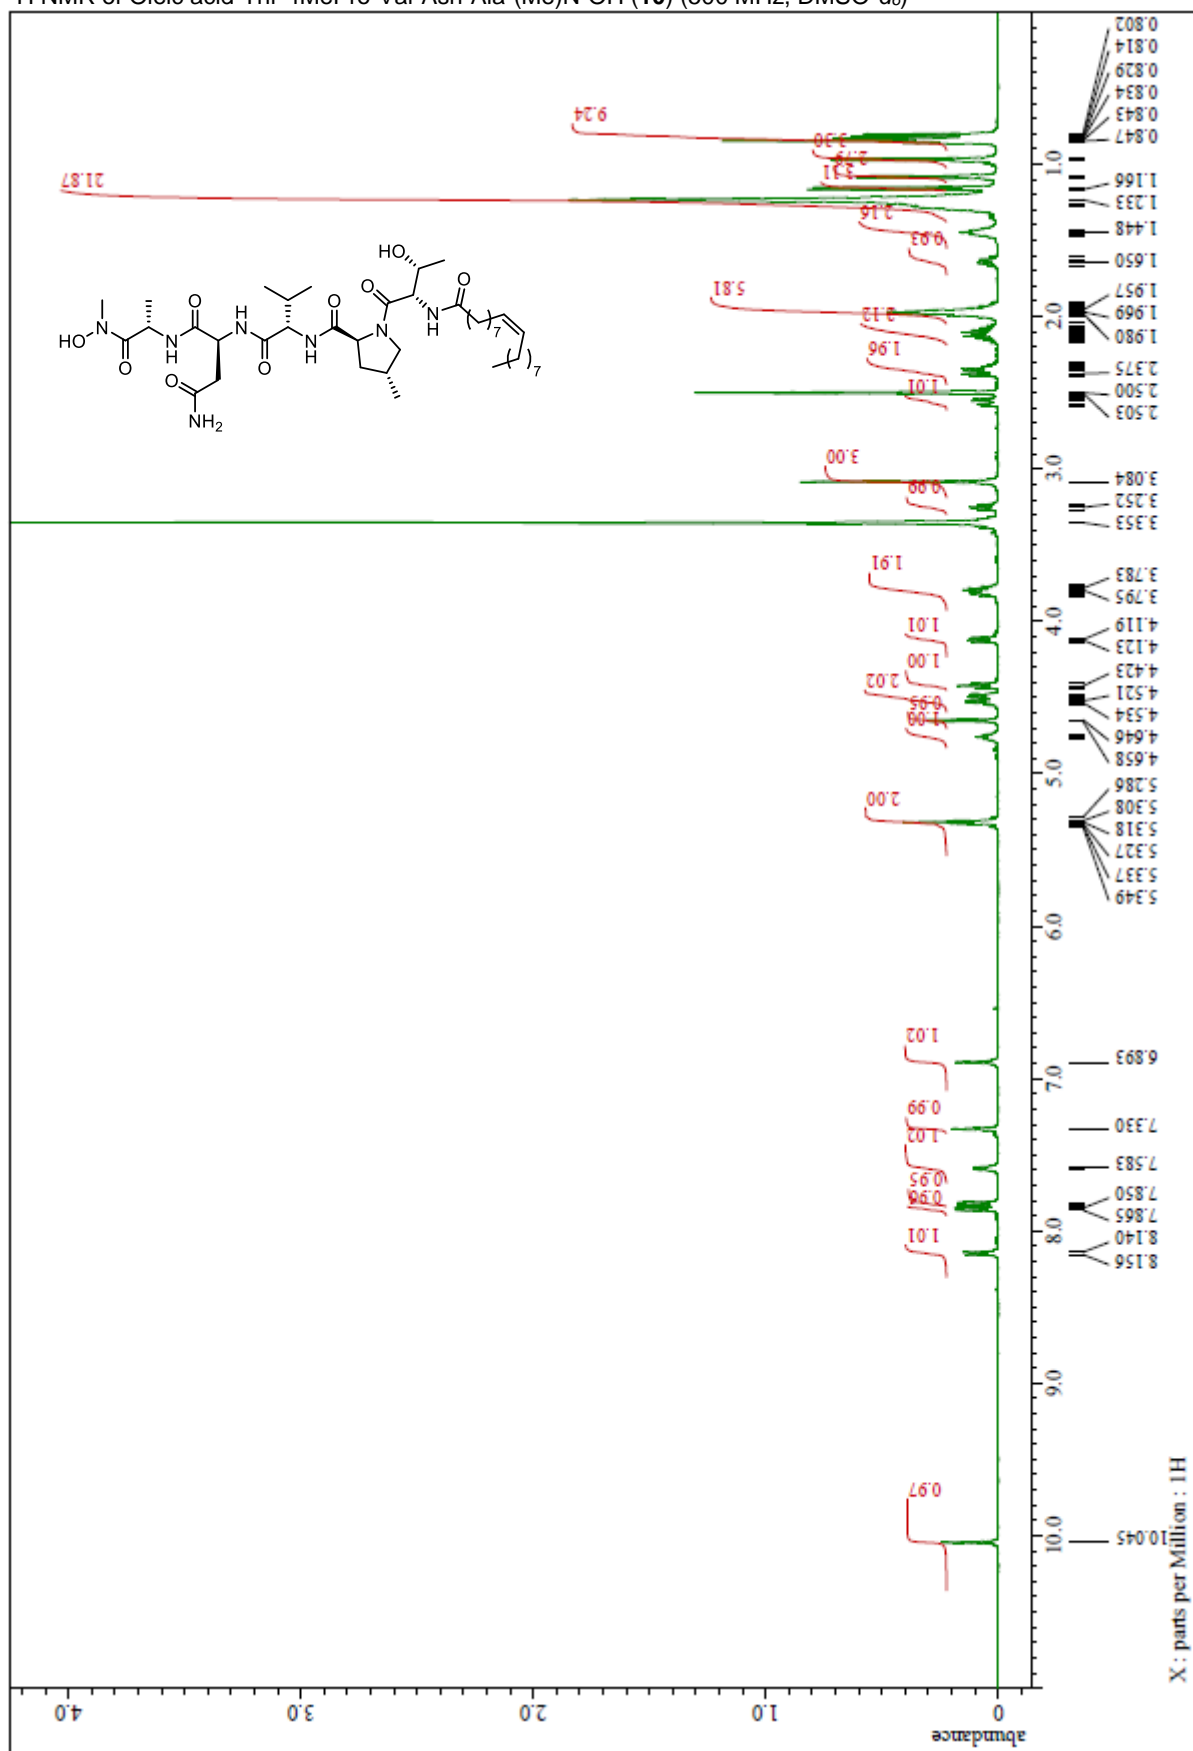

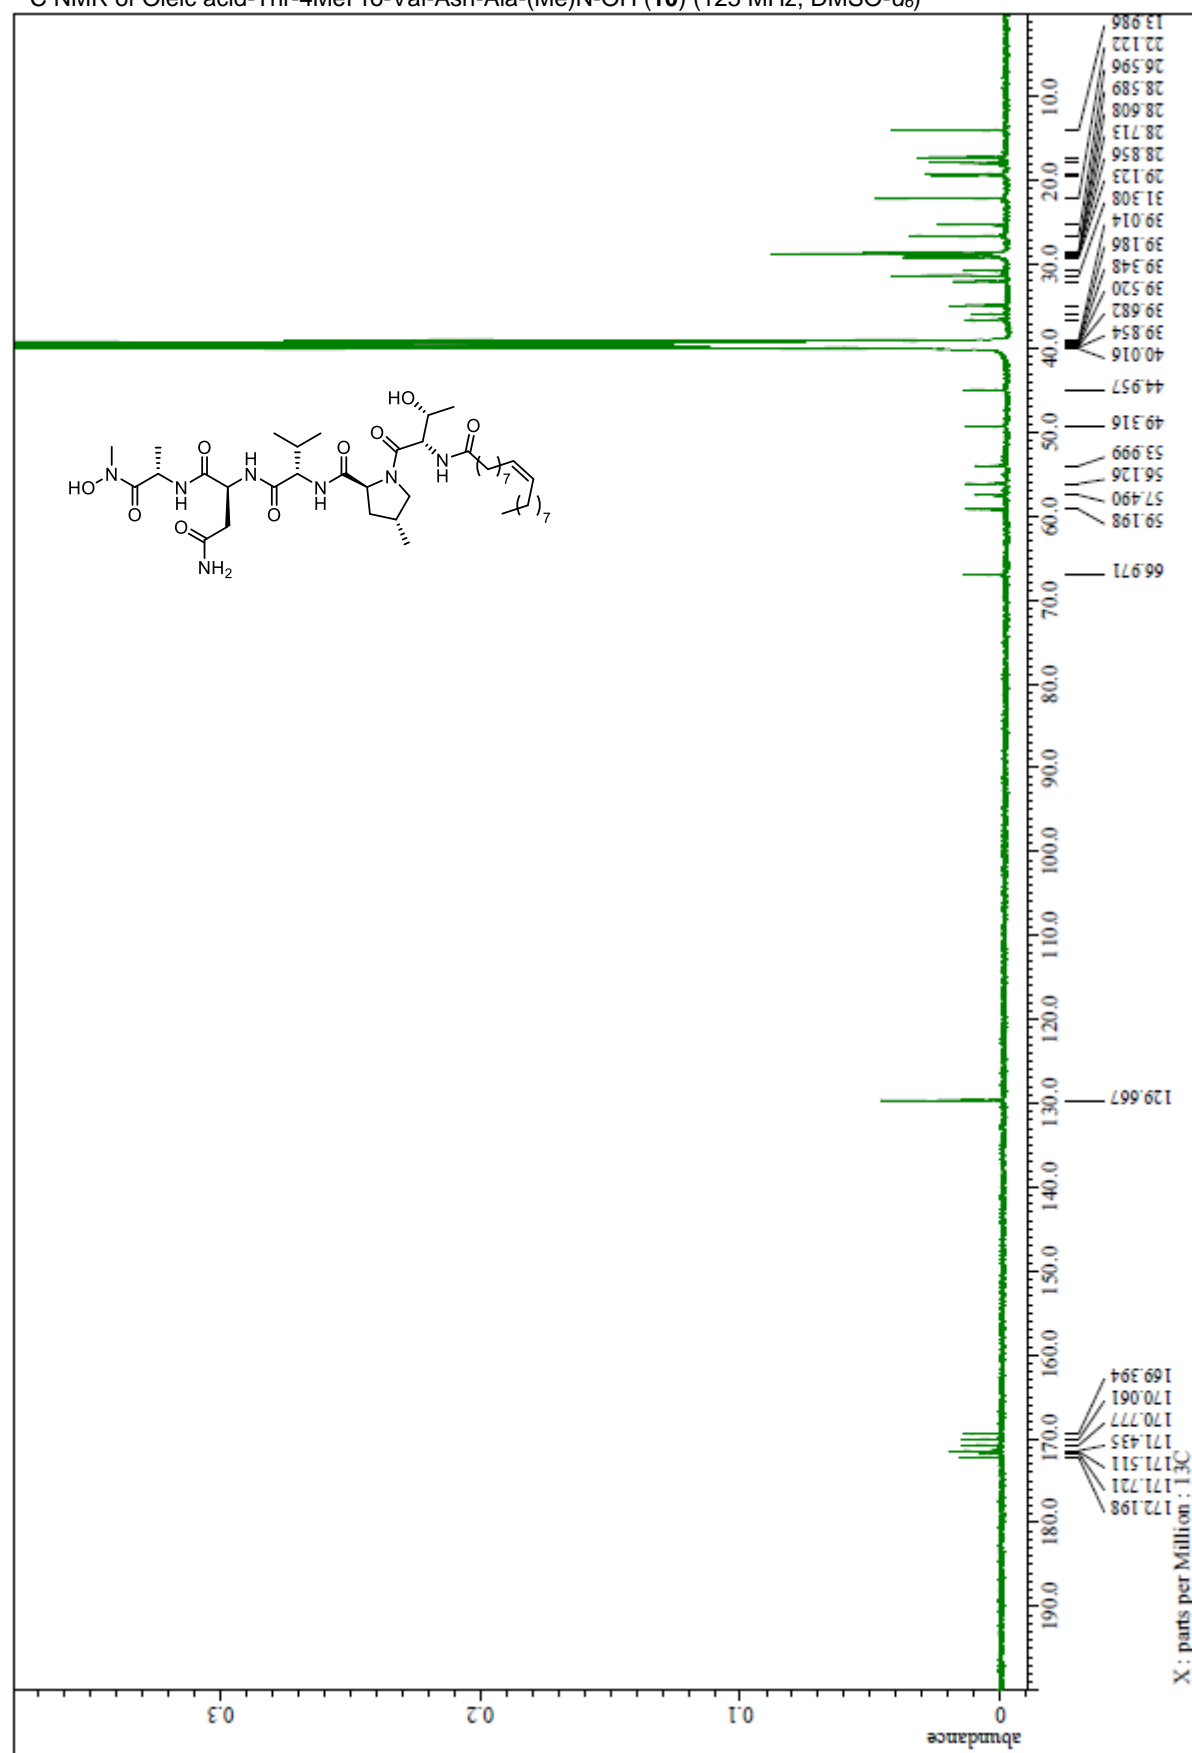

$^1\text{H}$  NMR of Stearic acid-Thr-4MePro-Val-Asn-Ala-H (**13**) (500 MHz,  $\text{DMSO}-d_6$ )

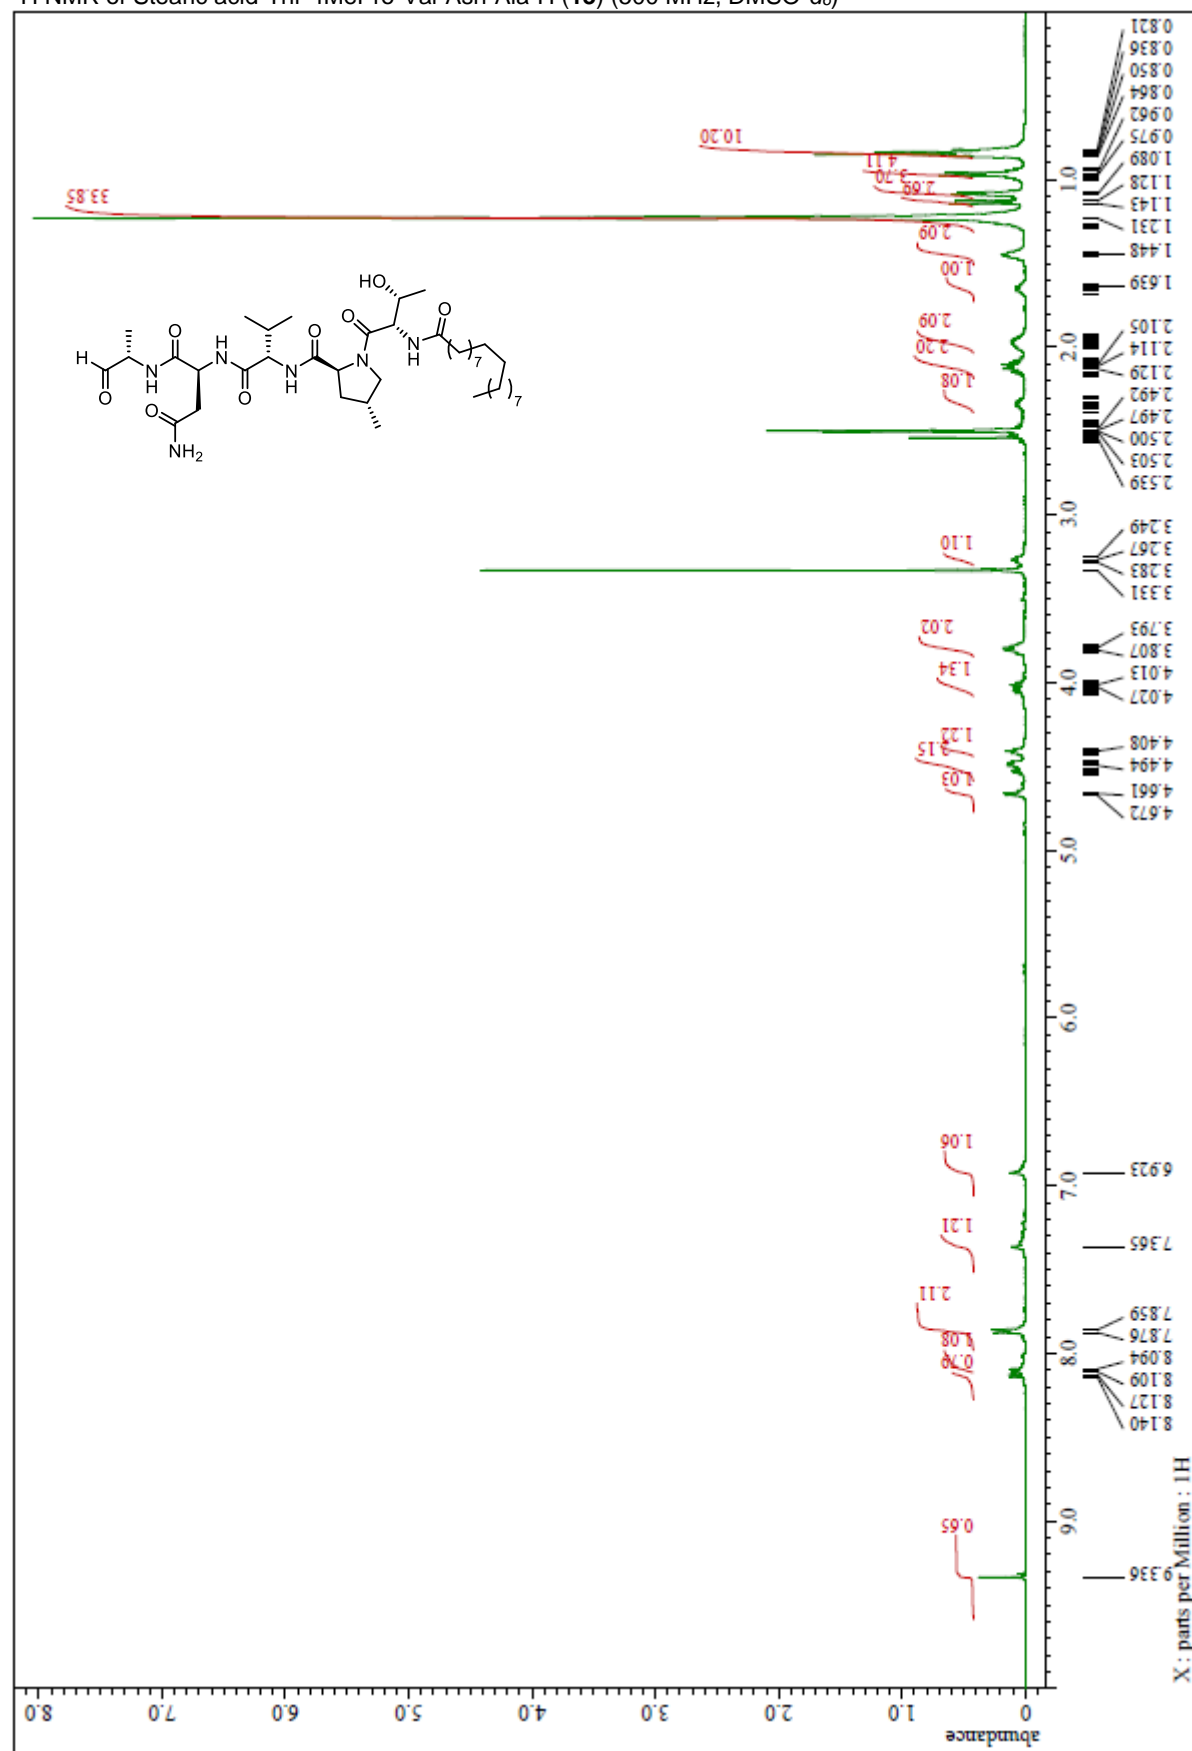

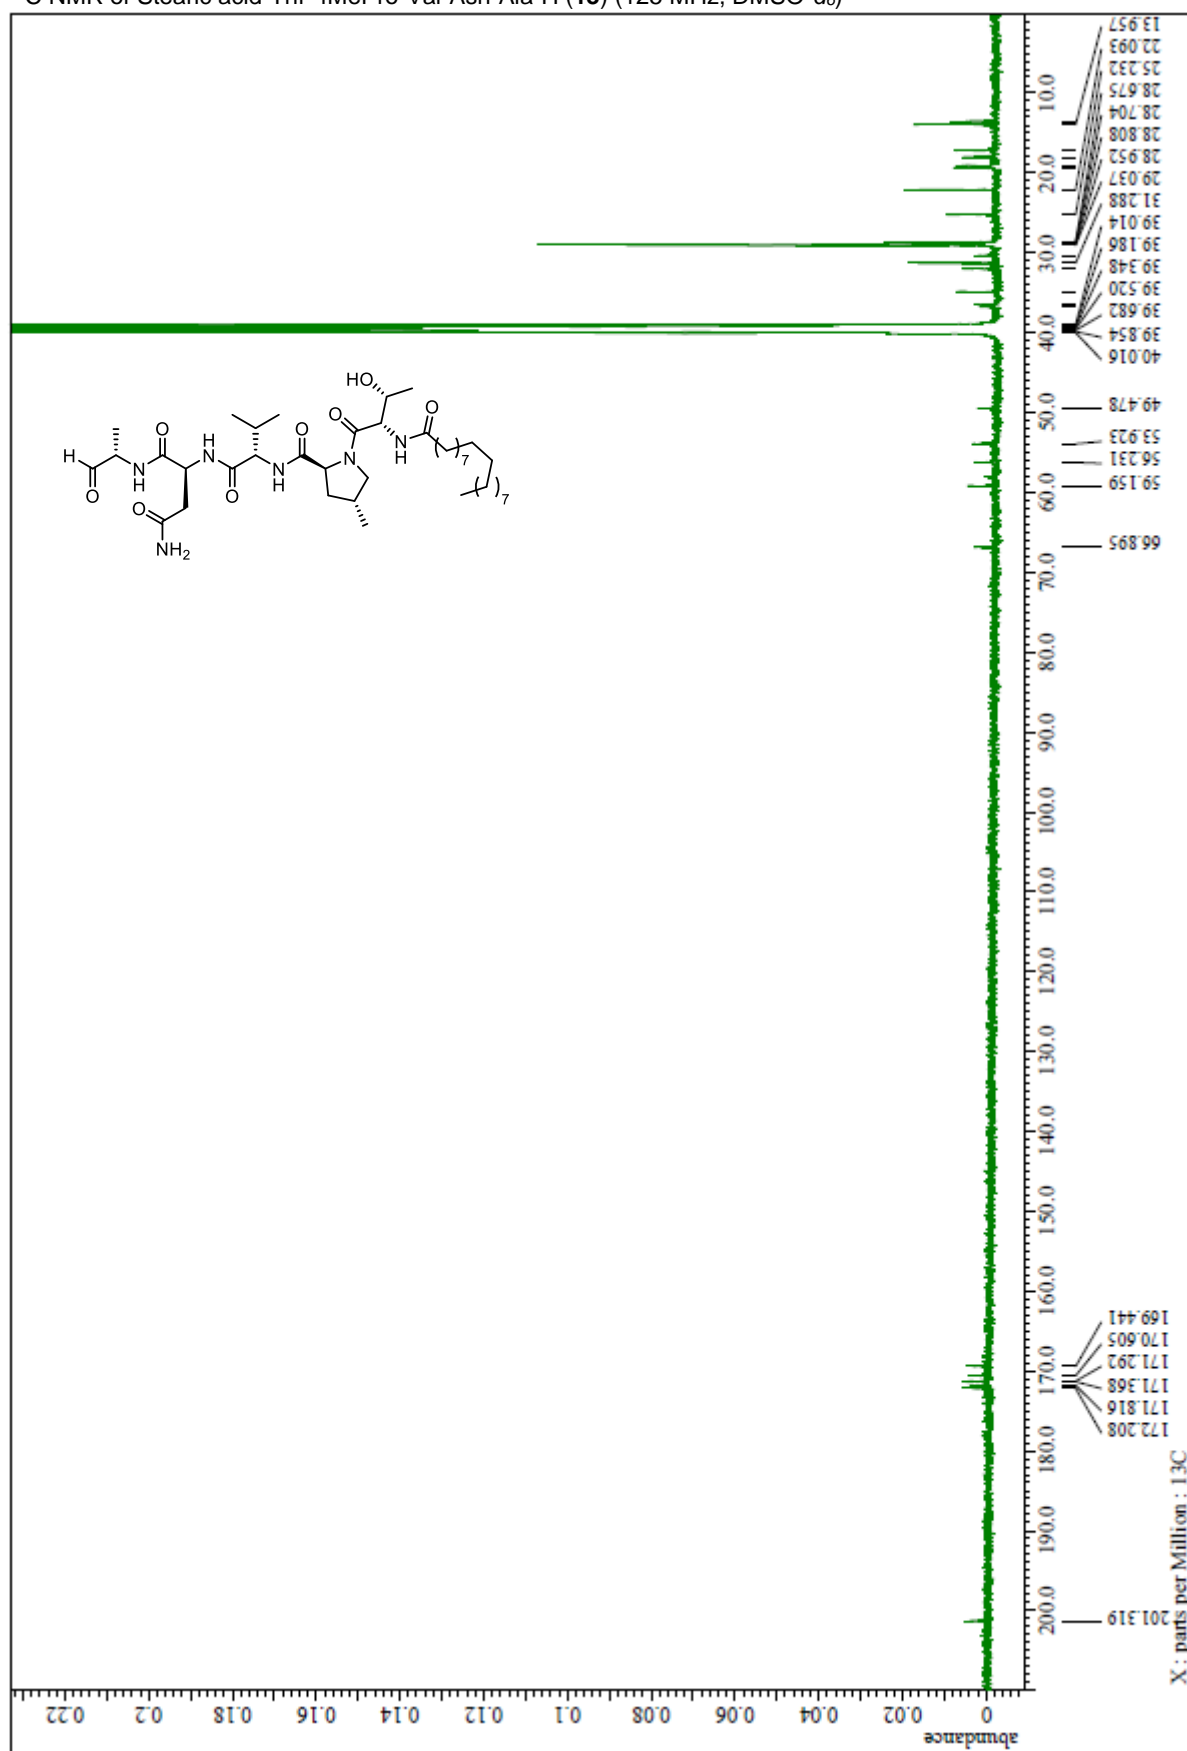

Supplement: Supplementary file 1 [file 17662967]
